# Supplementary material for: Towards a Comprehensive Wastewater Virome Atlas for Pathogen Monitoring
Source: Research Square preprint supplement (doi:10.21203/rs.3.rs-8093831/v1), 2025-11-17
Supplement: Supplementary file 1 [file 91f1910598cfbad70e154760.xlsx]

## Sheet: S1
Table S1. Metadata of the total samples, along with per sample reads and bases genertaed using sequencing.
sample_ID	Site	City	Date	Reads	Bases	Run	Library Type	Meteorological_Season
R-Ambavadi-Sept1	Ambawadi	Ahmedabad	2023-09-04	3191998	687895090	Run1	RNA	Monsoon 2023
R-Atladra-Sept1	Atladara	Vadodara	2023-09-05	4293936	926384518	Run1	RNA	Monsoon 2023
R-Chhani-Sept1	Channi	Vadodara	2023-09-05	5420965	1166223385	Run1	RNA	Monsoon 2023
R-Gajarwadi-Sept1	Gajarwadi	Vadodara	2023-09-05	57310724	12402973400	Run1	RNA	Monsoon 2023
R-Jamalpur-Sept1	Jamalpur	Ahmedabad	2023-09-04	4294406	928805153	Run1	RNA	Monsoon 2023
R-Kudasan-Sept1	Kudasan	Gandhinagar	2023-09-04	2249714	486778625	Run1	RNA	Monsoon 2023
R-Maninagar-Sept1	Maninagar	Ahmedabad	2023-09-04	10242827	2216342226	Run1	RNA	Monsoon 2023
R-Pirana-Sept1	Pirana	Ahmedabad	2023-09-04	8323741	1789163454	Run1	RNA	Monsoon 2023
R-Raysan-Sept1	Raysan	Gandhinagar	2023-09-04	30462637	6544508149	Run1	RNA	Monsoon 2023
R-Sargasan-Sept1	Sargasan	Gandhinagar	2023-09-04	4109889	890256288	Run1	RNA	Monsoon 2023
R-Tarsali-Sept1	Tarsali	Vadodara	2023-09-05	22342782	4829410498	Run1	RNA	Monsoon 2023
R-Vasna-MLD-Sept1	Vasna MLD	Ahmedabad	2023-09-04	24615007	5331280272	Run1	RNA	Monsoon 2023
R-Vasna-SPS-Sept1	Vasna SPS	Ahmedabad	2023-09-04	21587505	4663700692	Run1	RNA	Monsoon 2023
R-Vavol-Sept1	Vavol	Gandhinagar	2023-09-04	7879212	1701862935	Run1	RNA	Monsoon 2023
R-Vinzol-Sept1	Vinzol	Ahmedabad	2023-09-04	8938572	1936002289	Run1	RNA	Monsoon 2023
D-Ambavadi-Sept1	Ambawadi	Ahmedabad	2023-09-04	4170279	895251896	Run1	DNA	Monsoon 2023
D-Atladra-Sept1	Atladara	Vadodara	2023-09-05	2965674	639900341	Run1	DNA	Monsoon 2023
D-Chhani-Sept1	Channi	Vadodara	2023-09-05	2902323	627074662	Run1	DNA	Monsoon 2023
D-Gajarwadi-Sept1	Gajarwadi	Vadodara	2023-09-05	3885124	834496618	Run1	DNA	Monsoon 2023
D-Jamalpur-Sept1	Jamalpur	Ahmedabad	2023-09-04	3963434	852091250	Run1	DNA	Monsoon 2023
D-Kudasan-Sept1	Kudasan	Gandhinagar	2023-09-04	6771145	1461928291	Run1	DNA	Monsoon 2023
D-Pirana-Sept1	Pirana	Ahmedabad	2023-09-04	5113362	1104837042	Run1	DNA	Monsoon 2023
D-Raysan-Sept1	Raysan	Gandhinagar	2023-09-04	5787410	1249642031	Run1	DNA	Monsoon 2023
D-Tarsali-Sept1	Tarsali	Vadodara	2023-09-05	3124492	670295358	Run1	DNA	Monsoon 2023
D-Vasna-MLD-Sept1	Vasna MLD	Ahmedabad	2023-09-04	6369184	1374317030	Run1	DNA	Monsoon 2023
D-Vasna-SPS-Sept1	Vasna SPS	Ahmedabad	2023-09-04	7692318	1616038892	Run1	DNA	Monsoon 2023
D-Sargasan-Sept1	Sargasan	Gandhinagar	2023-09-04	6832942	1474210212	Run1	DNA	Monsoon 2023
D-Vavol-Sept1	Vavol	Gandhinagar	2023-09-04	5721456	1237234522	Run1	DNA	Monsoon 2023
D-Vinzol-Sept1	Vinzol	Ahmedabad	2023-09-04	8888866	1911491827	Run1	DNA	Monsoon 2023
R-Ambavadi-Sept2	Ambawadi	Ahmedabad	2023-09-18	9264113	2004715641	Run1	RNA	Monsoon 2023
R-Atladra-Sept2	Atladara	Vadodara	2023-09-19	2491583	538493823	Run1	RNA	Monsoon 2023
R-Chhani-Sept2	Channi	Vadodara	2023-09-19	15831264	3399267645	Run1	RNA	Monsoon 2023
R-Gajarwadi-Sept2	Gajarwadi	Vadodara	2023-09-19	2278291	491133929	Run1	RNA	Monsoon 2023
R-Jamalpur-Sept2	Jamalpur	Ahmedabad	2023-09-18	3203984	692649813	Run1	RNA	Monsoon 2023
R-Jaspur-Sept2	Jaspur	Gandhinagar	2023-09-18	3763303	810658871	Run1	RNA	Monsoon 2023
R-Kudasan-Sept2	Kudasan	Gandhinagar	2023-09-18	6345686	1370124159	Run1	RNA	Monsoon 2023
R-Maninagar-Sept2	Maninagar	Ahmedabad	2023-09-18	16718589	3618924444	Run1	RNA	Monsoon 2023
R-Pirana-Sept2	Pirana	Ahmedabad	2023-09-18	8398450	1815128019	Run1	RNA	Monsoon 2023
R-Raysan-Sept2	Raysan	Gandhinagar	2023-09-18	26882983	5819512566	Run1	RNA	Monsoon 2023
R-Sargasan-Sept2	Sargasan	Gandhinagar	2023-09-18	2472457	531505582	Run1	RNA	Monsoon 2023
R-Tarsali-Sept2	Tarsali	Vadodara	2023-09-19	25666104	5560399881	Run1	RNA	Monsoon 2023
R-Vasna-MLD-Sept2	Vasna MLD	Ahmedabad	2023-09-18	6902434	1494663516	Run1	RNA	Monsoon 2023
R-Vasna-SPS-Sept2	Vasna SPS	Ahmedabad	2023-09-18	4515270	976260170	Run1	RNA	Monsoon 2023
R-Vavol-Sept2	Vavol	Gandhinagar	2023-09-18	11604100	2493766394	Run1	RNA	Monsoon 2023
R-Vinzol-Sept2	Vinzol	Ahmedabad	2023-09-18	6979992	1507144527	Run1	RNA	Monsoon 2023
D-Atladra-Sept2	Atladara	Vadodara	2023-09-19	5781826	1243353281	Run1	DNA	Monsoon 2023
D-Gajarwadi-Sept2	Gajarwadi	Vadodara	2023-09-19	10588008	2278975718	Run1	DNA	Monsoon 2023
D-Kudasan-Sept2	Kudasan	Gandhinagar	2023-09-18	31335832	6648519509	Run1	DNA	Monsoon 2023
D-Maninagar-Sept2	Maninagar	Ahmedabad	2023-09-18	3381269	731094268	Run1	DNA	Monsoon 2023
D-Tarsali-Sept2	Tarsali	Vadodara	2023-09-19	2390839	514842934	Run1	DNA	Monsoon 2023
D-Vasna-MLD-Sept2	Vasna MLD	Ahmedabad	2023-09-18	5977898	1275208864	Run1	DNA	Monsoon 2023
D-Vasna-SPS-Sept2	Vasna SPS	Ahmedabad	2023-09-18	9992813	2156428699	Run1	DNA	Monsoon 2023
D-Vavol-Sept2	Vavol	Gandhinagar	2023-09-18	8672040	1872196760	Run1	DNA	Monsoon 2023
D-Ambavadi-Sept2	Ambawadi	Ahmedabad	2023-09-18	8042063	1736722764	Run1	DNA	Monsoon 2023
D-Chhani-Sept2	Channi	Vadodara	2023-09-19	2926836	633001825	Run1	DNA	Monsoon 2023
D-Jamalpur-Sept2	Jamalpur	Ahmedabad	2023-09-18	5939323	1284507983	Run1	DNA	Monsoon 2023
D-Jaspur-Sept2	Jaspur	Gandhinagar	2023-09-18	6126633	1323203395	Run1	DNA	Monsoon 2023
D-Pirana-Sept2	Pirana	Ahmedabad	2023-09-18	4856743	1049348550	Run1	DNA	Monsoon 2023
D-Raysan-Sept2	Raysan	Gandhinagar	2023-09-18	7455448	1612146482	Run1	DNA	Monsoon 2023
D-Sargasan-Sept2	Sargasan	Gandhinagar	2023-09-18	17642421	3798014203	Run1	DNA	Monsoon 2023
D-Vinzol-Sept2	Vinzol	Ahmedabad	2023-09-18	10899199	2346845660	Run1	DNA	Monsoon 2023
R-AP03	Pirana	Ahmedabad	2023-10-02	3454044	689467863	Run2	RNA	Monsoon 2023
R-AS03	Vasna SPS	Ahmedabad	2023-10-02	2203676	438756215	Run2	RNA	Monsoon 2023
D-AR03	Ranip	Ahmedabad	2023-10-02	2266249	490503394	Run2	DNA	Monsoon 2023
R-AV03	Vinzol	Ahmedabad	2023-10-02	14774543	3204095977	Run2	RNA	Monsoon 2023
R-AJ03	Jamalpur	Ahmedabad	2023-10-02	9140304	1980465714	Run2	RNA	Monsoon 2023
R-AD03	Paldi	Ahmedabad	2023-10-02	4576688	991115479	Run2	RNA	Monsoon 2023
R-AA03	Ambawadi	Ahmedabad	2023-10-02	12256987	2657049779	Run2	RNA	Monsoon 2023
R-AN03	Vasna MLD	Ahmedabad	2023-10-02	4783842	1037909926	Run2	RNA	Monsoon 2023
R-AM03	Motera	Ahmedabad	2023-10-02	6512479	1409890187	Run2	RNA	Monsoon 2023
R-AG03	Maninagar	Ahmedabad	2023-10-02	5738333	1241558829	Run2	RNA	Monsoon 2023
R-AR03	Ranip	Ahmedabad	2023-10-02	2498918	540974251	Run2	RNA	Monsoon 2023
D-AP03	Pirana	Ahmedabad	2023-10-02	7304862	1464619442	Run2	DNA	Monsoon 2023
D-AS03	Vasna SPS	Ahmedabad	2023-10-02	10444294	2084167530	Run2	DNA	Monsoon 2023
D-AV03	Vinzol	Ahmedabad	2023-10-02	11525536	2499216771	Run2	DNA	Monsoon 2023
D-AJ03	Jamalpur	Ahmedabad	2023-10-02	10184724	2208031391	Run2	DNA	Monsoon 2023
D-AA03	Ambawadi	Ahmedabad	2023-10-02	16360236	3548265665	Run2	DNA	Monsoon 2023
D-AD03	Paldi	Ahmedabad	2023-10-02	3465612	751584074	Run2	DNA	Monsoon 2023
D-AN03	Vasna MLD	Ahmedabad	2023-10-02	10835857	2351722185	Run2	DNA	Monsoon 2023
D-AG03	Maninagar	Ahmedabad	2023-10-02	7275205	1576203948	Run2	DNA	Monsoon 2023
D-AM03	Motera	Ahmedabad	2023-10-02	23387038	5066732701	Run2	DNA	Monsoon 2023
R-VT03	Tarsali	Vadodara	2023-10-03	26325751	5707494842	Run2	RNA	Monsoon 2023
R-GK03	Kudasan	Gandhinagar	2023-10-03	3839317	832146317	Run2	RNA	Monsoon 2023
R-VA03	Atladara	Vadodara	2023-10-03	9632874	2088624691	Run2	RNA	Monsoon 2023
R-GR03	Raysan	Gandhinagar	2023-10-03	2895400	627656284	Run2	RNA	Monsoon 2023
R-VC03	Channi	Vadodara	2023-10-03	11443178	2480043089	Run2	RNA	Monsoon 2023
R-VG03	Gajarwadi	Vadodara	2023-10-03	2094803	452955121	Run2	RNA	Monsoon 2023
R-GS03	Sargasan	Gandhinagar	2023-10-03	2829915	612724129	Run2	RNA	Monsoon 2023
R-GV03	Vavol	Gandhinagar	2023-10-03	4636540	1000634231	Run2	RNA	Monsoon 2023
R-GJ03	Jaspur	Gandhinagar	2023-10-03	2272232	492077611	Run2	RNA	Monsoon 2023
D-VT03	Tarsali	Vadodara	2023-10-03	5152223	1117505120	Run2	DNA	Monsoon 2023
D-VA03	Atladara	Vadodara	2023-10-03	11099361	2405540095	Run2	DNA	Monsoon 2023
D-VC03	Channi	Vadodara	2023-10-03	8484936	1840045209	Run2	DNA	Monsoon 2023
D-GS03	Sargasan	Gandhinagar	2023-10-03	4250458	920736139	Run2	DNA	Monsoon 2023
D-GR03	Raysan	Gandhinagar	2023-10-03	3918796	847667876	Run2	DNA	Monsoon 2023
D-GK03	Kudasan	Gandhinagar	2023-10-03	5206736	1127023108	Run2	DNA	Monsoon 2023
D-GV03	Vavol	Gandhinagar	2023-10-03	5167587	1109103669	Run2	DNA	Monsoon 2023
D-VG03	Gajarwadi	Vadodara	2023-10-03	2466077	534982521	Run2	DNA	Monsoon 2023
D-GJ03	Jaspur	Gandhinagar	2023-10-03	55840630	12086577579	Run2	DNA	Monsoon 2023
R-RR03	Raiya	Rajkot	2023-10-06	5026813	1085882631	Run2	RNA	Monsoon 2023
R-RO03	Kothariya old	Rajkot	2023-10-06	3544693	767624093	Run2	RNA	Monsoon 2023
R-RN03	Kothariya Near NH	Rajkot	2023-10-06	14928581	3228573183	Run2	RNA	Monsoon 2023
R-RP03	Popatpara	Rajkot	2023-10-06	7474208	1614033090	Run2	RNA	Monsoon 2023
R-RD03	Raiyadhar	Rajkot	2023-10-06	4836621	1046566737	Run2	RNA	Monsoon 2023
D-RR03	Raiya	Rajkot	2023-10-06	9803921	2097758821	Run2	DNA	Monsoon 2023
D-RD03	Raiyadhar	Rajkot	2023-10-06	7538424	1626284511	Run2	DNA	Monsoon 2023
D-RN03	Kothariya Near NH	Rajkot	2023-10-06	12723541	2753200446	Run2	DNA	Monsoon 2023
D-RO03	Kothariya old	Rajkot	2023-10-06	8749890	1867370648	Run2	DNA	Monsoon 2023
D-RP03	Popatpara	Rajkot	2023-10-06	82902382	17858830989	Run2	DNA	Monsoon 2023
R-AJ04	Jamalpur	Ahmedabad	2023-10-16	8135534	1763838709	Run2	RNA	Monsoon 2023
R-AA04	Ambawadi	Ahmedabad	2023-10-16	7477992	1621270037	Run2	RNA	Monsoon 2023
R-AP04	Pirana	Ahmedabad	2023-10-16	4790495	1038104712	Run2	RNA	Monsoon 2023
R-AM04	Motera	Ahmedabad	2023-10-16	3522060	761925118	Run2	RNA	Monsoon 2023
R-AR04	Ranip	Ahmedabad	2023-10-16	6841824	1481887673	Run2	RNA	Monsoon 2023
R-AV04	Vinzol	Ahmedabad	2023-10-16	7049968	1527579697	Run2	RNA	Monsoon 2023
R-AG04	Maninagar	Ahmedabad	2023-10-16	3834573	830752459	Run2	RNA	Monsoon 2023
R-AS04	Vasna SPS	Ahmedabad	2023-10-16	1907975	403369628	Run2	RNA	Monsoon 2023
D-AJ04	Jamalpur	Ahmedabad	2023-10-16	13868112	3007228814	Run2	DNA	Monsoon 2023
D-AV04	Vinzol	Ahmedabad	2023-10-16	36982074	8011133994	Run2	DNA	Monsoon 2023
D-AS04	Vasna SPS	Ahmedabad	2023-10-16	2350113	509959893	Run2	DNA	Monsoon 2023
D-AA04	Ambawadi	Ahmedabad	2023-10-16	12429193	2694698360	Run2	DNA	Monsoon 2023
D-AP04	Pirana	Ahmedabad	2023-10-16	11660775	2527560667	Run2	DNA	Monsoon 2023
D-AG04	Maninagar	Ahmedabad	2023-10-16	7290240	1582365186	Run2	DNA	Monsoon 2023
D-AR04	Ranip	Ahmedabad	2023-10-16	12372259	2666378609	Run2	DNA	Monsoon 2023
D-AM04	Motera	Ahmedabad	2023-10-16	7649274	1656034997	Run2	DNA	Monsoon 2023
D-VC04	Channi	Vadodara	2023-10-17	22372909	4839538036	Run2	DNA	Monsoon 2023
D-GR04	Raysan	Gandhinagar	2023-10-17	10758705	2327435643	Run2	DNA	Monsoon 2023
D-GJ04	Jaspur	Gandhinagar	2023-10-17	16054359	3472686632	Run2	DNA	Monsoon 2023
R-GR04	Raysan	Gandhinagar	2023-10-17	8638763	1871766412	Run2	RNA	Monsoon 2023
R-VG04	Gajarwadi	Vadodara	2023-10-17	5911484	1256184316	Run2	RNA	Monsoon 2023
R-GS04	Sargasan	Gandhinagar	2023-10-17	12584993	2729483678	Run2	RNA	Monsoon 2023
R-GJ04	Jaspur	Gandhinagar	2023-10-17	8927361	1933842671	Run2	RNA	Monsoon 2023
R-VT04	Tarsali	Vadodara	2023-10-17	8456036	1829395426	Run2	RNA	Monsoon 2023
R-VA04	Atladara	Vadodara	2023-10-17	7084481	1521955927	Run2	RNA	Monsoon 2023
R-GV04	Vavol	Gandhinagar	2023-10-17	6756907	1458635980	Run2	RNA	Monsoon 2023
R-GK04	Kudasan	Gandhinagar	2023-10-17	9481557	2039483024	Run2	RNA	Monsoon 2023
R-VC04	Channi	Vadodara	2023-10-17	8279565	1792917449	Run2	RNA	Monsoon 2023
D-VA04	Atladara	Vadodara	2023-10-17	9375545	2002220172	Run2	DNA	Monsoon 2023
D-GK04	Kudasan	Gandhinagar	2023-10-17	3473946	749185514	Run2	DNA	Monsoon 2023
D-VG04	Gajarwadi	Vadodara	2023-10-17	4773237	1033506412	Run2	DNA	Monsoon 2023
D-GS04	Sargasan	Gandhinagar	2023-10-17	3967243	858646784	Run2	DNA	Monsoon 2023
D-GV04	Vavol	Gandhinagar	2023-10-17	8548942	1850887785	Run2	DNA	Monsoon 2023
D-VT04	Tarsali	Vadodara	2023-10-17	6607459	1425177309	Run2	DNA	Monsoon 2023
D-RD04	Raiyadhar	Rajkot	2023-10-19	15621444	3388396840	Run2	DNA	Monsoon 2023
R-RR04	Raiya	Rajkot	2023-10-19	4848458	1047766379	Run2	RNA	Monsoon 2023
R-RO04	Kothariya old	Rajkot	2023-10-19	5456283	1179506818	Run2	RNA	Monsoon 2023
R-RD04	Raiyadhar	Rajkot	2023-10-19	8482874	1836751180	Run2	RNA	Monsoon 2023
R-RP04	Popatpara	Rajkot	2023-10-19	5252734	1134099782	Run2	RNA	Monsoon 2023
R-RN04	Kothariya Near NH	Rajkot	2023-10-19	7773317	1679744041	Run2	RNA	Monsoon 2023
D-RR04	Raiya	Rajkot	2023-10-19	10091317	2188824479	Run2	DNA	Monsoon 2023
D-RO04	Kothariya old	Rajkot	2023-10-19	11400967	2471901489	Run2	DNA	Monsoon 2023
D-RP04	Popatpara	Rajkot	2023-10-19	17444660	3783545825	Run2	DNA	Monsoon 2023
D-RN04	Kothariya Near NH	Rajkot	2023-10-19	15621736	3384230347	Run2	DNA	Monsoon 2023
D-VA05	Atladara	Vadodara	2023-10-31	9669161	1919587267	Run3	DNA	Monsoon 2023
D-VC05	Channi	Vadodara	2023-10-31	8202088	1639507560	Run3	DNA	Monsoon 2023
D-VG05	Gajarwadi	Vadodara	2023-10-31	6784974	1357882687	Run3	DNA	Monsoon 2023
D-VT05	Tarsali	Vadodara	2023-10-31	7034831	1410815464	Run3	DNA	Monsoon 2023
R-VA05	Atladara	Vadodara	2023-10-31	20420593	4098502986	Run3	RNA	Monsoon 2023
R-VC05	Channi	Vadodara	2023-10-31	47335101	9507412719	Run3	RNA	Monsoon 2023
R-VG05	Gajarwadi	Vadodara	2023-10-31	17890912	3593362911	Run3	RNA	Monsoon 2023
R-VT05	Tarsali	Vadodara	2023-10-31	14565749	2921198366	Run3	RNA	Monsoon 2023
D-RD05	Raiyadhar	Rajkot	2023-11-03	5330073	1069040913	Run3	DNA	Monsoon 2023
D-RN05	Kothariya Near NH	Rajkot	2023-11-03	6256599	1254656912	Run3	DNA	Monsoon 2023
D-RO05	Kothariya old	Rajkot	2023-11-03	7765620	1552671936	Run3	DNA	Monsoon 2023
D-RR05	Raiya	Rajkot	2023-11-03	13511999	2703649899	Run3	DNA	Monsoon 2023
R-RN05	Kothariya Near NH	Rajkot	2023-11-03	2807317	562313353	Run3	RNA	Monsoon 2023
R-RO05	Kothariya old	Rajkot	2023-11-03	4156344	834210538	Run3	RNA	Monsoon 2023
R-RR05	Raiya	Rajkot	2023-11-03	9274557	1861557239	Run3	RNA	Monsoon 2023
R-RD05	Raiyadhar	Rajkot	2023-11-03	3742670	750960938	Run3	RNA	Monsoon 2023
D-AP05	Pirana	Ahmedabad	2023-11-06	11516057	2305685703	Run3	DNA	Monsoon 2023
D-AA05	Ambawadi	Ahmedabad	2023-11-06	9249370	1855729833	Run3	DNA	Monsoon 2023
D-AD05	Paldi	Ahmedabad	2023-11-06	9735476	1940232342	Run3	DNA	Monsoon 2023
D-AG05	Maninagar	Ahmedabad	2023-11-06	4497410	901094134	Run3	DNA	Monsoon 2023
D-AJ05	Jamalpur	Ahmedabad	2023-11-06	10680381	2142696020	Run3	DNA	Monsoon 2023
D-AM05	Motera	Ahmedabad	2023-11-06	7245427	1450576267	Run3	DNA	Monsoon 2023
D-AN05	Vasna MLD	Ahmedabad	2023-11-06	6263556	1240524663	Run3	DNA	Monsoon 2023
D-AS05	Vasna SPS	Ahmedabad	2023-11-06	8917688	1786784424	Run3	DNA	Monsoon 2023
D-AV05	Vinzol	Ahmedabad	2023-11-06	5219282	1047067382	Run3	DNA	Monsoon 2023
R-AR05	Ranip	Ahmedabad	2023-11-06	23113886	4640816837	Run3	RNA	Monsoon 2023
R-AN05	Vasna MLD	Ahmedabad	2023-11-06	8130739	1632929723	Run3	RNA	Monsoon 2023
R-AP05	Pirana	Ahmedabad	2023-11-06	9334476	1874607021	Run3	RNA	Monsoon 2023
R-AA05	Ambawadi	Ahmedabad	2023-11-06	4109158	823343794	Run3	RNA	Monsoon 2023
R-AD05	Paldi	Ahmedabad	2023-11-06	7512687	1506788494	Run3	RNA	Monsoon 2023
R-AG05	Maninagar	Ahmedabad	2023-11-06	8513059	1706055299	Run3	RNA	Monsoon 2023
R-AJ05	Jamalpur	Ahmedabad	2023-11-06	19455471	3907457723	Run3	RNA	Monsoon 2023
R-AS05	Vasna SPS	Ahmedabad	2023-11-06	8681714	1744381716	Run3	RNA	Monsoon 2023
R-AM05	Motera	Ahmedabad	2023-11-06	11303095	2263189924	Run3	RNA	Monsoon 2023
R-AV05	Vinzol	Ahmedabad	2023-11-06	55197490	11086341728	Run3	RNA	Monsoon 2023
D-AR05	Ranip	Ahmedabad	2023-11-06	17228552	3416093324	Run3	DNA	Monsoon 2023
D-GJ05	Jaspur	Gandhinagar	2023-11-07	7028317	1407599057	Run3	DNA	Monsoon 2023
D-GK05	Kudasan	Gandhinagar	2023-11-07	17065088	3412568955	Run3	DNA	Monsoon 2023
D-GR05	Raysan	Gandhinagar	2023-11-07	7113747	1421789360	Run3	DNA	Monsoon 2023
D-GS05	Sargasan	Gandhinagar	2023-11-07	9720587	1946922940	Run3	DNA	Monsoon 2023
D-GV05	Vavol	Gandhinagar	2023-11-07	10343847	2067532784	Run3	DNA	Monsoon 2023
R-GJ05	Jaspur	Gandhinagar	2023-11-07	5946681	1191589787	Run3	RNA	Monsoon 2023
R-GK05	Kudasan	Gandhinagar	2023-11-07	4197187	842953245	Run3	RNA	Monsoon 2023
R-GR05	Raysan	Gandhinagar	2023-11-07	10431394	2093148724	Run3	RNA	Monsoon 2023
R-GS05	Sargasan	Gandhinagar	2023-11-07	13337806	2678817827	Run3	RNA	Monsoon 2023
R-GV05	Vavol	Gandhinagar	2023-11-07	4526737	908370229	Run3	RNA	Monsoon 2023
D-AP06	Pirana	Ahmedabad	2023-11-20	4800572	958331205	Run3	DNA	Monsoon 2023
D-AA06	Ambawadi	Ahmedabad	2023-11-20	5847423	1173539450	Run3	DNA	Monsoon 2023
D-AD06	Paldi	Ahmedabad	2023-11-20	5166790	1033724983	Run3	DNA	Monsoon 2023
D-AG06	Maninagar	Ahmedabad	2023-11-20	5521912	1098949225	Run3	DNA	Monsoon 2023
D-AJ06	Jamalpur	Ahmedabad	2023-11-20	5640634	1129998063	Run3	DNA	Monsoon 2023
D-AM06	Motera	Ahmedabad	2023-11-20	5458101	1092582713	Run3	DNA	Monsoon 2023
D-AR06	Ranip	Ahmedabad	2023-11-20	4508955	900893669	Run3	DNA	Monsoon 2023
D-AS06	Vasna SPS	Ahmedabad	2023-11-20	4412787	880779704	Run3	DNA	Monsoon 2023
R-AN06	Vasna MLD	Ahmedabad	2023-11-20	5588511	1120051507	Run3	RNA	Monsoon 2023
R-AA06	Ambawadi	Ahmedabad	2023-11-20	4898917	983447325	Run3	RNA	Monsoon 2023
R-AP06	Pirana	Ahmedabad	2023-11-20	11654658	2338974660	Run3	RNA	Monsoon 2023
R-AD06	Paldi	Ahmedabad	2023-11-20	5248209	1051836619	Run3	RNA	Monsoon 2023
R-AG06	Maninagar	Ahmedabad	2023-11-20	18806062	3777759671	Run3	RNA	Monsoon 2023
R-AR06	Ranip	Ahmedabad	2023-11-20	3862050	768196282	Run3	RNA	Monsoon 2023
R-AJ06	Jamalpur	Ahmedabad	2023-11-20	37844355	7602126446	Run3	RNA	Monsoon 2023
R-AS06	Vasna SPS	Ahmedabad	2023-11-20	4257521	852474082	Run3	RNA	Monsoon 2023
R-AM06	Motera	Ahmedabad	2023-11-20	15007729	3010462060	Run3	RNA	Monsoon 2023
R-AV06	Vinzol	Ahmedabad	2023-11-20	25739181	5170966107	Run3	RNA	Monsoon 2023
D-AV06	Vinzol	Ahmedabad	2023-11-20	6403995	1283202416	Run3	DNA	Monsoon 2023
D-AN06	Vasna MLD	Ahmedabad	2023-11-20	4833537	966991865	Run3	DNA	Monsoon 2023
D-GJ06	Jaspur	Gandhinagar	2023-11-21	5086561	1019005942	Run3	DNA	Monsoon 2023
D-GK06	Kudasan	Gandhinagar	2023-11-21	6124376	1226551828	Run3	DNA	Monsoon 2023
D-GR06	Raysan	Gandhinagar	2023-11-21	6304627	1260338588	Run3	DNA	Monsoon 2023
D-GS06	Sargasan	Gandhinagar	2023-11-21	2453403	489811432	Run3	DNA	Monsoon 2023
D-GV06	Vavol	Gandhinagar	2023-11-21	6553405	1314114830	Run3	DNA	Monsoon 2023
D-VA06	Atladara	Vadodara	2023-11-21	7775091	1557888243	Run3	DNA	Monsoon 2023
D-VC06	Channi	Vadodara	2023-11-21	12992902	2587525202	Run3	DNA	Monsoon 2023
D-VG06	Gajarwadi	Vadodara	2023-11-21	13367725	2635338265	Run3	DNA	Monsoon 2023
D-VT06	Tarsali	Vadodara	2023-11-21	5134906	1028172311	Run3	DNA	Monsoon 2023
R-VA06	Atladara	Vadodara	2023-11-21	21399760	4293948475	Run3	RNA	Monsoon 2023
R-VC06	Channi	Vadodara	2023-11-21	19042081	3824252320	Run3	RNA	Monsoon 2023
R-VG06	Gajarwadi	Vadodara	2023-11-21	12781757	2565867255	Run3	RNA	Monsoon 2023
R-VT06	Tarsali	Vadodara	2023-11-21	13488229	2702489586	Run3	RNA	Monsoon 2023
R-GJ06	Jaspur	Gandhinagar	2023-11-21	11898094	2379819554	Run3	RNA	Monsoon 2023
R-GK06	Kudasan	Gandhinagar	2023-11-21	9716852	1944429897	Run3	RNA	Monsoon 2023
R-GR06	Raysan	Gandhinagar	2023-11-21	36325144	7281658146	Run3	RNA	Monsoon 2023
R-GS06	Sargasan	Gandhinagar	2023-11-21	13854337	2770258617	Run3	RNA	Monsoon 2023
R-GV06	Vavol	Gandhinagar	2023-11-21	17362660	3479979948	Run3	RNA	Monsoon 2023
D-RD06	Raiyadhar	Rajkot	2023-11-23	5959504	1193570887	Run3	DNA	Monsoon 2023
D-RN06	Kothariya Near NH	Rajkot	2023-11-23	14845073	2973818432	Run3	DNA	Monsoon 2023
D-RO06	Kothariya old	Rajkot	2023-11-23	12679150	2537265316	Run3	DNA	Monsoon 2023
D-RP06	Popatpara	Rajkot	2023-11-23	6554808	1312077405	Run3	DNA	Monsoon 2023
D-RR06	Raiya	Rajkot	2023-11-23	5897367	1181224822	Run3	DNA	Monsoon 2023
R-RN06	Kothariya Near NH	Rajkot	2023-11-23	6363888	1277304445	Run3	RNA	Monsoon 2023
R-RO06	Kothariya old	Rajkot	2023-11-23	12104164	2430260214	Run3	RNA	Monsoon 2023
R-RP06	Popatpara	Rajkot	2023-11-23	10397059	2089775247	Run3	RNA	Monsoon 2023
R-RR06	Raiya	Rajkot	2023-11-23	11848523	2373311302	Run3	RNA	Monsoon 2023
R-RD06	Raiyadhar	Rajkot	2023-11-23	16627698	3312732113	Run3	RNA	Monsoon 2023
R-AP07	Pirana	Ahmedabad	2023-12-04	8560008	1719568424	Run4	RNA	Winter 2023-2024
R-AR07	Ranip	Ahmedabad	2023-12-04	16215107	3256421429	Run4	RNA	Winter 2023-2024
R-AS07	Vasna SPS	Ahmedabad	2023-12-04	9704187	1949801146	Run4	RNA	Winter 2023-2024
R-AV07	Vinzol	Ahmedabad	2023-12-04	9852075	1978886296	Run4	RNA	Winter 2023-2024
D-AA07	Ambawadi	Ahmedabad	2023-12-04	4492957	902737941	Run4	DNA	Winter 2023-2024
D-AD07	Paldi	Ahmedabad	2023-12-04	3747776	751647635	Run4	DNA	Winter 2023-2024
D-AG07	Maninagar	Ahmedabad	2023-12-04	4906890	980741287	Run4	DNA	Winter 2023-2024
D-AJ07	Jamalpur	Ahmedabad	2023-12-04	7116937	1428527429	Run4	DNA	Winter 2023-2024
D-AM07	Motera	Ahmedabad	2023-12-04	10945284	2194768857	Run4	DNA	Winter 2023-2024
D-AP07	Pirana	Ahmedabad	2023-12-04	5443148	1092871047	Run4	DNA	Winter 2023-2024
D-AS07	Vasna SPS	Ahmedabad	2023-12-04	5869891	1176973424	Run4	DNA	Winter 2023-2024
R-AA07	Ambawadi	Ahmedabad	2023-12-04	38951476	7825553724	Run4	RNA	Winter 2023-2024
R-AD07	Paldi	Ahmedabad	2023-12-04	4700014	942896831	Run4	RNA	Winter 2023-2024
R-AG07	Maninagar	Ahmedabad	2023-12-04	31460034	6317348789	Run4	RNA	Winter 2023-2024
R-AJ07	Jamalpur	Ahmedabad	2023-12-04	1953428	392444989	Run4	RNA	Winter 2023-2024
R-AM07	Motera	Ahmedabad	2023-12-04	22983545	4616838745	Run4	RNA	Winter 2023-2024
R-AN07	Vasna MLD	Ahmedabad	2023-12-04	8704957	1745680810	Run4	RNA	Winter 2023-2024
D-AN07	Vasna MLD	Ahmedabad	2023-12-04	1833583	368258467	Run4	DNA	Winter 2023-2024
D-AR07	Ranip	Ahmedabad	2023-12-04	3975445	783736994	Run4	DNA	Winter 2023-2024
D-AV07	Vinzol	Ahmedabad	2023-12-04	4821558	968365838	Run4	DNA	Winter 2023-2024
R-VA07	Atladara	Vadodara	2023-12-05	6717023	1348495155	Run4	RNA	Winter 2023-2024
R-VG07	Gajarwadi	Vadodara	2023-12-05	9530514	1913897369	Run4	RNA	Winter 2023-2024
R-GJ07	Jaspur	Gandhinagar	2023-12-05	1827414	367084754	Run4	RNA	Winter 2023-2024
R-GK07	Kudasan	Gandhinagar	2023-12-05	6769825	1360234106	Run4	RNA	Winter 2023-2024
R-VT07	Tarsali	Vadodara	2023-12-05	24901793	5001885818	Run4	RNA	Winter 2023-2024
R-GR07	Raysan	Gandhinagar	2023-12-05	16637245	3341741615	Run4	RNA	Winter 2023-2024
R-GS07	Sargasan	Gandhinagar	2023-12-05	4936856	990960684	Run4	RNA	Winter 2023-2024
R-GV07	Vavol	Gandhinagar	2023-12-05	39222046	7881098481	Run4	RNA	Winter 2023-2024
R-VC07	Channi	Vadodara	2023-12-05	13330603	2676219690	Run4	RNA	Winter 2023-2024
D-VC07	Channi	Vadodara	2023-12-05	5084462	1020962681	Run4	DNA	Winter 2023-2024
D-GK07	Kudasan	Gandhinagar	2023-12-05	10358921	2076650733	Run4	DNA	Winter 2023-2024
D-GV07	Vavol	Gandhinagar	2023-12-05	3048476	606859560	Run4	DNA	Winter 2023-2024
D-VA07	Atladara	Vadodara	2023-12-05	3248851	642468967	Run4	DNA	Winter 2023-2024
D-GJ07	Jaspur	Gandhinagar	2023-12-05	6199773	1234604359	Run4	DNA	Winter 2023-2024
D-VG07	Gajarwadi	Vadodara	2023-12-05	6731810	1350876220	Run4	DNA	Winter 2023-2024
D-GR07	Raysan	Gandhinagar	2023-12-05	4065819	809251631	Run4	DNA	Winter 2023-2024
D-GS07	Sargasan	Gandhinagar	2023-12-05	4256629	832828552	Run4	DNA	Winter 2023-2024
D-VT07	Tarsali	Vadodara	2023-12-05	4531703	906914940	Run4	DNA	Winter 2023-2024
R-AP08	Pirana	Ahmedabad	2023-12-18	3251010	652329736	Run4	RNA	Winter 2023-2024
R-AR08	Ranip	Ahmedabad	2023-12-18	38348466	7699369714	Run4	RNA	Winter 2023-2024
R-AS08	Vasna SPS	Ahmedabad	2023-12-18	7340245	1473644414	Run4	RNA	Winter 2023-2024
R-AV08	Vinzol	Ahmedabad	2023-12-18	6329990	1271133259	Run4	RNA	Winter 2023-2024
D-AD08	Paldi	Ahmedabad	2023-12-18	4422328	883776356	Run4	DNA	Winter 2023-2024
D-AG08	Maninagar	Ahmedabad	2023-12-18	4436221	891110980	Run4	DNA	Winter 2023-2024
D-AJ08	Jamalpur	Ahmedabad	2023-12-18	3347187	671837424	Run4	DNA	Winter 2023-2024
D-AN08	Vasna MLD	Ahmedabad	2023-12-18	5704581	1136936952	Run4	DNA	Winter 2023-2024
D-AV08	Vinzol	Ahmedabad	2023-12-18	5220706	1048464882	Run4	DNA	Winter 2023-2024
R-AA08	Ambawadi	Ahmedabad	2023-12-18	10032133	2014056749	Run4	RNA	Winter 2023-2024
R-AD08	Paldi	Ahmedabad	2023-12-18	8671968	1741535110	Run4	RNA	Winter 2023-2024
R-AG08	Maninagar	Ahmedabad	2023-12-18	4762769	955633629	Run4	RNA	Winter 2023-2024
R-AJ08	Jamalpur	Ahmedabad	2023-12-18	25611270	5141645898	Run4	RNA	Winter 2023-2024
R-AM08	Motera	Ahmedabad	2023-12-18	5995306	1203669047	Run4	RNA	Winter 2023-2024
R-AN08	Vasna MLD	Ahmedabad	2023-12-18	17956243	3606136311	Run4	RNA	Winter 2023-2024
D-AA08	Ambawadi	Ahmedabad	2023-12-18	2839331	569889636	Run4	DNA	Winter 2023-2024
D-AM08	Motera	Ahmedabad	2023-12-18	3821823	766613345	Run4	DNA	Winter 2023-2024
D-AP08	Pirana	Ahmedabad	2023-12-18	4490548	895055440	Run4	DNA	Winter 2023-2024
D-AR08	Ranip	Ahmedabad	2023-12-18	2875868	577802914	Run4	DNA	Winter 2023-2024
D-AS08	Vasna SPS	Ahmedabad	2023-12-18	4942536	989708896	Run4	DNA	Winter 2023-2024
R-VC08	Channi	Vadodara	2023-12-19	8830657	1774236553	Run4	RNA	Winter 2023-2024
R-VG08	Gajarwadi	Vadodara	2023-12-19	11180882	2245341382	Run4	RNA	Winter 2023-2024
R-GJ08	Jaspur	Gandhinagar	2023-12-19	44483045	8927708098	Run4	RNA	Winter 2023-2024
R-GK08	Kudasan	Gandhinagar	2023-12-19	6692403	1344079093	Run4	RNA	Winter 2023-2024
R-VT08	Tarsali	Vadodara	2023-12-19	7510161	1509015756	Run4	RNA	Winter 2023-2024
R-GR08	Raysan	Gandhinagar	2023-12-19	2986150	598735636	Run4	RNA	Winter 2023-2024
R-GS08	Sargasan	Gandhinagar	2023-12-19	26715032	5362504975	Run4	RNA	Winter 2023-2024
R-GV08	Vavol	Gandhinagar	2023-12-19	14216900	2855242802	Run4	RNA	Winter 2023-2024
R-VA08	Atladara	Vadodara	2023-12-19	3787362	759743411	Run4	RNA	Winter 2023-2024
D-VA08	Atladara	Vadodara	2023-12-19	2691014	533594029	Run4	DNA	Winter 2023-2024
D-VC08	Channi	Vadodara	2023-12-19	2867227	571367503	Run4	DNA	Winter 2023-2024
D-VT08	Tarsali	Vadodara	2023-12-19	3283607	658190336	Run4	DNA	Winter 2023-2024
D-VG08	Gajarwadi	Vadodara	2023-12-19	4096580	815905229	Run4	DNA	Winter 2023-2024
D-GJ08	Jaspur	Gandhinagar	2023-12-19	5386364	1077797629	Run4	DNA	Winter 2023-2024
D-GK08	Kudasan	Gandhinagar	2023-12-19	3398362	680596801	Run4	DNA	Winter 2023-2024
D-GR08	Raysan	Gandhinagar	2023-12-19	2135335	427054154	Run4	DNA	Winter 2023-2024
D-GS08	Sargasan	Gandhinagar	2023-12-19	4343865	869882221	Run4	DNA	Winter 2023-2024
D-GV08	Vavol	Gandhinagar	2023-12-19	5511193	1104003501	Run4	DNA	Winter 2023-2024
R-RO08	Kothariya old	Rajkot	2023-12-27	9249780	1853783693	Run4	RNA	Winter 2023-2024
R-RP08	Popatpara	Rajkot	2023-12-27	5104634	1025143191	Run4	RNA	Winter 2023-2024
R-RR08	Raiya	Rajkot	2023-12-27	20645096	4146462825	Run4	RNA	Winter 2023-2024
R-RD08	Raiyadhar	Rajkot	2023-12-27	40628133	8158181032	Run4	RNA	Winter 2023-2024
R-RN08	Kothariya Near NH	Rajkot	2023-12-27	4465988	895522486	Run4	RNA	Winter 2023-2024
D-RP08	Popatpara	Rajkot	2023-12-27	6940688	1390388389	Run4	DNA	Winter 2023-2024
D-RR08	Raiya	Rajkot	2023-12-27	4029105	803485153	Run4	DNA	Winter 2023-2024
D-RD08	Raiyadhar	Rajkot	2023-12-27	13206555	2642173047	Run4	DNA	Winter 2023-2024
D-RN08	Kothariya Near NH	Rajkot	2023-12-27	9343780	1855579218	Run4	DNA	Winter 2023-2024
D-RO08	Kothariya old	Rajkot	2023-12-27	11118722	2228812959	Run4	DNA	Winter 2023-2024
D-RN09	Kothariya Near NH	Rajkot	2024-01-01	12330028	2431912559	Run5	DNA	Winter 2023-2024
D-AJ09	Jamalpur	Ahmedabad	2024-01-01	6444758	1371216224	Run5	DNA	Winter 2023-2024
D-AM09	Motera	Ahmedabad	2024-01-01	3659652	759495003	Run5	DNA	Winter 2023-2024
D-AN09	Vasna MLD	Ahmedabad	2024-01-01	6260956	1282313779	Run5	DNA	Winter 2023-2024
D-AR09	Ranip	Ahmedabad	2024-01-01	7914337	1682765226	Run5	DNA	Winter 2023-2024
D-AS09	Vasna SPS	Ahmedabad	2024-01-01	8530379	1779271085	Run5	DNA	Winter 2023-2024
D-RR09	Raiya	Rajkot	2024-01-01	8508377	1807835531	Run5	DNA	Winter 2023-2024
R-AA09	Ambawadi	Ahmedabad	2024-01-01	38197089	8254644074	Run5	RNA	Winter 2023-2024
R-AD09	Paldi	Ahmedabad	2024-01-01	7334642	1579623954	Run5	RNA	Winter 2023-2024
R-AG09	Maninagar	Ahmedabad	2024-01-01	4302131	912899626	Run5	RNA	Winter 2023-2024
R-AJ09	Jamalpur	Ahmedabad	2024-01-01	17770045	3836497597	Run5	RNA	Winter 2023-2024
R-AM09	Motera	Ahmedabad	2024-01-01	4539598	974735504	Run5	RNA	Winter 2023-2024
R-AN09	Vasna MLD	Ahmedabad	2024-01-01	4637601	997369861	Run5	RNA	Winter 2023-2024
R-RD09	Raiyadhar	Rajkot	2024-01-01	6083945	1305856256	Run5	RNA	Winter 2023-2024
R-AP09	Pirana	Ahmedabad	2024-01-01	9212443	1985104302	Run5	RNA	Winter 2023-2024
R-RR09	Raiya	Rajkot	2024-01-01	13735970	2955282673	Run5	RNA	Winter 2023-2024
R-RN09	Kothariya Near NH	Rajkot	2024-01-01	9451576	2035432749	Run5	RNA	Winter 2023-2024
R-AR09	Ranip	Ahmedabad	2024-01-01	9583186	2056691246	Run5	RNA	Winter 2023-2024
R-AS09	Vasna SPS	Ahmedabad	2024-01-01	9414752	2028254714	Run5	RNA	Winter 2023-2024
R-RO09	Kothariya old	Rajkot	2024-01-01	7462046	1582207324	Run5	RNA	Winter 2023-2024
R-AV09	Vinzol	Ahmedabad	2024-01-01	3143434	674331345	Run5	RNA	Winter 2023-2024
R-RP09	Popatpara	Rajkot	2024-01-01	3612439	768837469	Run5	RNA	Winter 2023-2024
D-AD09	Paldi	Ahmedabad	2024-01-01	2403533	513133050	Run5	DNA	Winter 2023-2024
D-AG09	Maninagar	Ahmedabad	2024-01-01	3666322	776417963	Run5	DNA	Winter 2023-2024
D-AP09	Pirana	Ahmedabad	2024-01-01	3086821	629978371	Run5	DNA	Winter 2023-2024
D-RO09	Kothariya old	Rajkot	2024-01-01	7607585	1626131969	Run5	DNA	Winter 2023-2024
D-AV09	Vinzol	Ahmedabad	2024-01-01	2192447	468592205	Run5	DNA	Winter 2023-2024
D-RD09	Raiyadhar	Rajkot	2024-01-01	7077905	1455356697	Run5	DNA	Winter 2023-2024
D-RP09	Popatpara	Rajkot	2024-01-01	3404324	692379106	Run5	DNA	Winter 2023-2024
D-AA09	Ambawadi	Ahmedabad	2024-01-01	4147659	890302250	Run5	DNA	Winter 2023-2024
D-GJ09	Jaspur	Gandhinagar	2024-01-02	5565836	1182744582	Run5	DNA	Winter 2023-2024
D-GK09	Kudasan	Gandhinagar	2024-01-02	2990195	631873198	Run5	DNA	Winter 2023-2024
D-GR09	Raysan	Gandhinagar	2024-01-02	5111106	1093933425	Run5	DNA	Winter 2023-2024
D-GS09	Sargasan	Gandhinagar	2024-01-02	4447983	949553865	Run5	DNA	Winter 2023-2024
D-GV09	Vavol	Gandhinagar	2024-01-02	5564939	1190150372	Run5	DNA	Winter 2023-2024
D-VG09	Gajarwadi	Vadodara	2024-01-02	6234361	1316014415	Run5	DNA	Winter 2023-2024
D-VT09	Tarsali	Vadodara	2024-01-02	8610537	1759151469	Run5	DNA	Winter 2023-2024
R-GS09	Sargasan	Gandhinagar	2024-01-02	8771092	1888221505	Run5	RNA	Winter 2023-2024
R-GV09	Vavol	Gandhinagar	2024-01-02	11321171	2431001110	Run5	RNA	Winter 2023-2024
R-GJ09	Jaspur	Gandhinagar	2024-01-02	28810424	6213995401	Run5	RNA	Winter 2023-2024
R-GK09	Kudasan	Gandhinagar	2024-01-02	13794359	2972653518	Run5	RNA	Winter 2023-2024
R-VA09	Atladara	Vadodara	2024-01-02	3357075	719886032	Run5	RNA	Winter 2023-2024
R-GR09	Raysan	Gandhinagar	2024-01-02	3671731	793963849	Run5	RNA	Winter 2023-2024
R-VC09	Channi	Vadodara	2024-01-02	6052260	1297698600	Run5	RNA	Winter 2023-2024
R-VG09	Gajarwadi	Vadodara	2024-01-02	9914477	2132085009	Run5	RNA	Winter 2023-2024
R-VT09	Tarsali	Vadodara	2024-01-02	3198821	678931728	Run5	RNA	Winter 2023-2024
D-VA09	Atladara	Vadodara	2024-01-02	5812501	1198382719	Run5	DNA	Winter 2023-2024
D-VC09	Channi	Vadodara	2024-01-02	8685114	1848860936	Run5	DNA	Winter 2023-2024
D-AJ10	Jamalpur	Ahmedabad	2024-01-15	4934936	1050961617	Run5	DNA	Winter 2023-2024
D-AM10	Motera	Ahmedabad	2024-01-15	3411511	722908177	Run5	DNA	Winter 2023-2024
D-AP10	Pirana	Ahmedabad	2024-01-15	5596931	1153382004	Run5	DNA	Winter 2023-2024
D-AR10	Ranip	Ahmedabad	2024-01-15	4885222	1013893010	Run5	DNA	Winter 2023-2024
R-AD10	Paldi	Ahmedabad	2024-01-15	6065149	1285813712	Run5	RNA	Winter 2023-2024
R-AG10	Maninagar	Ahmedabad	2024-01-15	11718823	2518386518	Run5	RNA	Winter 2023-2024
R-AJ10	Jamalpur	Ahmedabad	2024-01-15	14218330	3045868564	Run5	RNA	Winter 2023-2024
R-AM10	Motera	Ahmedabad	2024-01-15	3561730	757644030	Run5	RNA	Winter 2023-2024
R-AP10	Pirana	Ahmedabad	2024-01-15	15695293	3385850616	Run5	RNA	Winter 2023-2024
R-AR10	Ranip	Ahmedabad	2024-01-15	5490448	1159955769	Run5	RNA	Winter 2023-2024
R-AS10	Vasna SPS	Ahmedabad	2024-01-15	13548336	2920689107	Run5	RNA	Winter 2023-2024
R-AV10	Vinzol	Ahmedabad	2024-01-15	17538874	3765033982	Run5	RNA	Winter 2023-2024
D-AD10	Paldi	Ahmedabad	2024-01-15	5643363	1209254518	Run5	DNA	Winter 2023-2024
D-AG10	Maninagar	Ahmedabad	2024-01-15	7606820	1618126691	Run5	DNA	Winter 2023-2024
D-AS10	Vasna SPS	Ahmedabad	2024-01-15	3014126	639995573	Run5	DNA	Winter 2023-2024
D-AV10	Vinzol	Ahmedabad	2024-01-15	6125621	1284941159	Run5	DNA	Winter 2023-2024
D-RN10	Kothariya Near NH	Rajkot	2024-01-16	3280807	702720689	Run5	DNA	Winter 2023-2024
D-RR10	Raiya	Rajkot	2024-01-16	6234809	1322340793	Run5	DNA	Winter 2023-2024
D-RO10	Kothariya old	Rajkot	2024-01-16	4586094	968239131	Run5	DNA	Winter 2023-2024
D-GJ10	Jaspur	Gandhinagar	2024-01-16	7812555	1672868161	Run5	DNA	Winter 2023-2024
D-GK10	Kudasan	Gandhinagar	2024-01-16	8767848	1841550056	Run5	DNA	Winter 2023-2024
D-GR10	Raysan	Gandhinagar	2024-01-16	2589840	533431633	Run5	DNA	Winter 2023-2024
R-RD10	Raiyadhar	Rajkot	2024-01-16	38579878	8310867850	Run5	RNA	Winter 2023-2024
R-GR10	Raysan	Gandhinagar	2024-01-16	12049110	2592899831	Run5	RNA	Winter 2023-2024
R-GS10	Sargasan	Gandhinagar	2024-01-16	4749816	997231366	Run5	RNA	Winter 2023-2024
R-GV10	Vavol	Gandhinagar	2024-01-16	2534589	544141319	Run5	RNA	Winter 2023-2024
R-RN10	Kothariya Near NH	Rajkot	2024-01-16	3714955	793813148	Run5	RNA	Winter 2023-2024
R-RO10	Kothariya old	Rajkot	2024-01-16	9386553	2021203076	Run5	RNA	Winter 2023-2024
R-RP10	Popatpara	Rajkot	2024-01-16	7273492	1560793952	Run5	RNA	Winter 2023-2024
R-GJ10	Jaspur	Gandhinagar	2024-01-16	5408787	1162172707	Run5	RNA	Winter 2023-2024
R-GK10	Kudasan	Gandhinagar	2024-01-16	8648406	1858855977	Run5	RNA	Winter 2023-2024
R-RR10	Raiya	Rajkot	2024-01-16	29478840	6354041893	Run5	RNA	Winter 2023-2024
D-GS10	Sargasan	Gandhinagar	2024-01-16	3571758	741944477	Run5	DNA	Winter 2023-2024
D-GV10	Vavol	Gandhinagar	2024-01-16	4620671	985359568	Run5	DNA	Winter 2023-2024
D-RD10	Raiyadhar	Rajkot	2024-01-16	7155611	1529447110	Run5	DNA	Winter 2023-2024
D-RP10	Popatpara	Rajkot	2024-01-16	1744333	370347486	Run5	DNA	Winter 2023-2024
D-VC10	Channi	Vadodara	2024-01-17	7956412	1631033802	Run5	DNA	Winter 2023-2024
R-VA10	Atladara	Vadodara	2024-01-17	3545678	756693261	Run5	RNA	Winter 2023-2024
R-VC10	Channi	Vadodara	2024-01-17	6668847	1410765907	Run5	RNA	Winter 2023-2024
R-VG10	Gajarwadi	Vadodara	2024-01-17	2781778	593624116	Run5	RNA	Winter 2023-2024
R-VT10	Tarsali	Vadodara	2024-01-17	2616722	551692748	Run5	RNA	Winter 2023-2024
D-VA10	Atladara	Vadodara	2024-01-17	2344658	500759550	Run5	DNA	Winter 2023-2024
D-VG10	Gajarwadi	Vadodara	2024-01-17	3865147	806334083	Run5	DNA	Winter 2023-2024
D-VT10	Tarsali	Vadodara	2024-01-17	2099405	418104087	Run5	DNA	Winter 2023-2024
R-VA11	Atladara	Vadodara	2024-02-05	11826850	2542671140	Run6	RNA	Winter 2023-2024
R-VC11	Channi	Vadodara	2024-02-05	9389600	2006107482	Run6	RNA	Winter 2023-2024
R-VT11	Tarsali	Vadodara	2024-02-05	30076932	6447199921	Run6	RNA	Winter 2023-2024
R-VG11	Gajarwadi	Vadodara	2024-02-05	10031007	2149999712	Run6	RNA	Winter 2023-2024
D-VT11	Tarsali	Vadodara	2024-02-05	3062613	614170123	Run6	DNA	Winter 2023-2024
D-VC11	Channi	Vadodara	2024-02-05	2224722	468227731	Run6	DNA	Winter 2023-2024
D-VG11	Gajarwadi	Vadodara	2024-02-05	5031623	930623925	Run6	DNA	Winter 2023-2024
D-VA11	Atladara	Vadodara	2024-02-05	2361218	479564048	Run6	DNA	Winter 2023-2024
R-GJ11	Jaspur	Gandhinagar	2024-02-06	40457318	8703119239	Run6	RNA	Winter 2023-2024
R-GK11	Kudasan	Gandhinagar	2024-02-06	11732884	2532987616	Run6	RNA	Winter 2023-2024
R-AV11	Vinzol	Ahmedabad	2024-02-06	13785365	2983451473	Run6	RNA	Winter 2023-2024
R-AN11	Vasna MLD	Ahmedabad	2024-02-06	11573175	2502043654	Run6	RNA	Winter 2023-2024
R-AP11	Pirana	Ahmedabad	2024-02-06	15360621	3322710936	Run6	RNA	Winter 2023-2024
R-AS11	Vasna SPS	Ahmedabad	2024-02-06	16298048	3524722223	Run6	RNA	Winter 2023-2024
R-GV11	Vavol	Gandhinagar	2024-02-06	7382321	1595744107	Run6	RNA	Winter 2023-2024
R-AG11	Maninagar	Ahmedabad	2024-02-06	11716573	2533189241	Run6	RNA	Winter 2023-2024
R-AR11	Ranip	Ahmedabad	2024-02-06	17055756	3677064788	Run6	RNA	Winter 2023-2024
R-AJ11	Jamalpur	Ahmedabad	2024-02-06	7402794	1600312562	Run6	RNA	Winter 2023-2024
R-GS11	Sargasan	Gandhinagar	2024-02-06	4058955	873973291	Run6	RNA	Winter 2023-2024
R-AA11	Ambawadi	Ahmedabad	2024-02-06	6689753	1444525749	Run6	RNA	Winter 2023-2024
R-GR11	Raysan	Gandhinagar	2024-02-06	1734854	368078058	Run6	RNA	Winter 2023-2024
D-AG11	Maninagar	Ahmedabad	2024-02-06	12350748	2579959719	Run6	DNA	Winter 2023-2024
R-AD11	Paldi	Ahmedabad	2024-02-06	4665991	1003869833	Run6	RNA	Winter 2023-2024
R-AM11	Motera	Ahmedabad	2024-02-06	4365523	926454129	Run6	RNA	Winter 2023-2024
D-GS11	Sargasan	Gandhinagar	2024-02-06	8896128	1912372312	Run6	DNA	Winter 2023-2024
D-AP11	Pirana	Ahmedabad	2024-02-06	6387936	1305187854	Run6	DNA	Winter 2023-2024
D-AS11	Vasna SPS	Ahmedabad	2024-02-06	10169821	2125451973	Run6	DNA	Winter 2023-2024
D-GJ11	Jaspur	Gandhinagar	2024-02-06	8249438	1776195315	Run6	DNA	Winter 2023-2024
D-AV11	Vinzol	Ahmedabad	2024-02-06	7560427	1587776747	Run6	DNA	Winter 2023-2024
D-GK11	Kudasan	Gandhinagar	2024-02-06	5076717	1065947698	Run6	DNA	Winter 2023-2024
D-AN11	Vasna MLD	Ahmedabad	2024-02-06	5522500	1182991374	Run6	DNA	Winter 2023-2024
D-AR11	Ranip	Ahmedabad	2024-02-06	14653934	3161215828	Run6	DNA	Winter 2023-2024
D-AM11	Motera	Ahmedabad	2024-02-06	3662573	770524987	Run6	DNA	Winter 2023-2024
D-GV11	Vavol	Gandhinagar	2024-02-06	9066848	1960750069	Run6	DNA	Winter 2023-2024
D-AA11	Ambawadi	Ahmedabad	2024-02-06	3668073	773619632	Run6	DNA	Winter 2023-2024
D-AJ11	Jamalpur	Ahmedabad	2024-02-06	8792751	1862441492	Run6	DNA	Winter 2023-2024
D-GR11	Raysan	Gandhinagar	2024-02-06	3614247	744920922	Run6	DNA	Winter 2023-2024
D-AD11	Paldi	Ahmedabad	2024-02-06	13543152	2817791063	Run6	DNA	Winter 2023-2024
R-RR11	Raiya	Rajkot	2024-02-14	20927853	4485856844	Run6	RNA	Winter 2023-2024
R-RD11	Raiyadhar	Rajkot	2024-02-14	39536116	8464202888	Run6	RNA	Winter 2023-2024
R-RN11	Kothariya Near NH	Rajkot	2024-02-14	24360165	5229576822	Run6	RNA	Winter 2023-2024
R-RP11	Popatpara	Rajkot	2024-02-14	17790905	3825357046	Run6	RNA	Winter 2023-2024
D-RD11	Raiyadhar	Rajkot	2024-02-14	2273182	487876047	Run6	DNA	Winter 2023-2024
D-RR11	Raiya	Rajkot	2024-02-14	2489015	518160162	Run6	DNA	Winter 2023-2024
D-RN11	Kothariya Near NH	Rajkot	2024-02-14	3015985	622487822	Run6	DNA	Winter 2023-2024
D-RP11	Popatpara	Rajkot	2024-02-14	6203531	1332085491	Run6	DNA	Winter 2023-2024
D-RO11	Kothariya old	Rajkot	2024-02-14	2543112	527532445	Run6	DNA	Winter 2023-2024
R-RO11	Kothariya old	Rajkot	2024-02-14	54949	11699952	Run6	RNA	Winter 2023-2024
R-VT12	Tarsali	Vadodara	2024-02-19	25216858	5444732654	Run6	RNA	Winter 2023-2024
R-VA12	Atladara	Vadodara	2024-02-19	12245939	2643899532	Run6	RNA	Winter 2023-2024
R-GJ12	Jaspur	Gandhinagar	2024-02-19	4930928	1059636385	Run6	RNA	Winter 2023-2024
R-GV12	Vavol	Gandhinagar	2024-02-19	7438957	1607206924	Run6	RNA	Winter 2023-2024
R-GS12	Sargasan	Gandhinagar	2024-02-19	96567182	20881351580	Run6	RNA	Winter 2023-2024
R-AN12	Vasna MLD	Ahmedabad	2024-02-19	13797801	2977652618	Run6	RNA	Winter 2023-2024
R-VC12	Channi	Vadodara	2024-02-19	15635499	3364844018	Run6	RNA	Winter 2023-2024
R-GK12	Kudasan	Gandhinagar	2024-02-19	8919539	1924196440	Run6	RNA	Winter 2023-2024
R-VG12	Gajarwadi	Vadodara	2024-02-19	14450497	3120899503	Run6	RNA	Winter 2023-2024
R-AS12	Vasna SPS	Ahmedabad	2024-02-19	12967053	2804344802	Run6	RNA	Winter 2023-2024
R-GR12	Raysan	Gandhinagar	2024-02-19	10795856	2339358519	Run6	RNA	Winter 2023-2024
R-AJ12	Jamalpur	Ahmedabad	2024-02-19	5807092	1253253681	Run6	RNA	Winter 2023-2024
R-AG12	Maninagar	Ahmedabad	2024-02-19	17785122	3846728205	Run6	RNA	Winter 2023-2024
R-AP12	Pirana	Ahmedabad	2024-02-19	17050723	3688477335	Run6	RNA	Winter 2023-2024
R-AM12	Motera	Ahmedabad	2024-02-19	8011445	1725222150	Run6	RNA	Winter 2023-2024
R-AR12	Ranip	Ahmedabad	2024-02-19	10173613	2200015388	Run6	RNA	Winter 2023-2024
R-AV12	Vinzol	Ahmedabad	2024-02-19	43539756	9413102092	Run6	RNA	Winter 2023-2024
D-GK12	Kudasan	Gandhinagar	2024-02-19	4442725	957108530	Run6	DNA	Winter 2023-2024
D-AG12	Maninagar	Ahmedabad	2024-02-19	11493506	2457496290	Run6	DNA	Winter 2023-2024
D-GS12	Sargasan	Gandhinagar	2024-02-19	1913805	412237678	Run6	DNA	Winter 2023-2024
D-VT12	Tarsali	Vadodara	2024-02-19	2497390	529668004	Run6	DNA	Winter 2023-2024
D-VA12	Atladara	Vadodara	2024-02-19	3757612	786034117	Run6	DNA	Winter 2023-2024
D-GV12	Vavol	Gandhinagar	2024-02-19	6468980	1381952533	Run6	DNA	Winter 2023-2024
D-VC12	Channi	Vadodara	2024-02-19	6626823	1409991872	Run6	DNA	Winter 2023-2024
D-AS12	Vasna SPS	Ahmedabad	2024-02-19	8843175	1904446069	Run6	DNA	Winter 2023-2024
D-VG12	Gajarwadi	Vadodara	2024-02-19	5662822	1211117015	Run6	DNA	Winter 2023-2024
D-AN12	Vasna MLD	Ahmedabad	2024-02-19	12226766	2599876059	Run6	DNA	Winter 2023-2024
D-AP12	Pirana	Ahmedabad	2024-02-19	6867318	1468419210	Run6	DNA	Winter 2023-2024
D-AR12	Ranip	Ahmedabad	2024-02-19	3227899	690379365	Run6	DNA	Winter 2023-2024
D-AM12	Motera	Ahmedabad	2024-02-19	6205947	1328283176	Run6	DNA	Winter 2023-2024
D-GR12	Raysan	Gandhinagar	2024-02-19	3263449	693402054	Run6	DNA	Winter 2023-2024
D-AV12	Vinzol	Ahmedabad	2024-02-19	5022517	1078706822	Run6	DNA	Winter 2023-2024
D-GJ12	Jaspur	Gandhinagar	2024-02-19	1080665	230537880	Run6	DNA	Winter 2023-2024
D-AA12	Ambawadi	Ahmedabad	2024-02-19	3858778	828521677	Run6	DNA	Winter 2023-2024
D-AJ12	Jamalpur	Ahmedabad	2024-02-19	4415444	936274240	Run6	DNA	Winter 2023-2024
R-AA12	Ambawadi	Ahmedabad	2024-02-19	379850	80755346	Run6	RNA	Winter 2023-2024
R-RR12	Raiya	Rajkot	2024-02-27	21056773	4547784220	Run6	RNA	Winter 2023-2024
R-RN12	Kothariya Near NH	Rajkot	2024-02-27	7643714	1652093052	Run6	RNA	Winter 2023-2024
R-RP12	Popatpara	Rajkot	2024-02-27	5495188	1178936265	Run6	RNA	Winter 2023-2024
R-RD12	Raiyadhar	Rajkot	2024-02-27	9154559	1977938211	Run6	RNA	Winter 2023-2024
D-RD12	Raiyadhar	Rajkot	2024-02-27	5238421	1107186262	Run6	DNA	Winter 2023-2024
D-RN12	Kothariya Near NH	Rajkot	2024-02-27	2403007	507283293	Run6	DNA	Winter 2023-2024
D-RO12	Kothariya old	Rajkot	2024-02-27	3886800	808808629	Run6	DNA	Winter 2023-2024
D-RR12	Raiya	Rajkot	2024-02-27	3198386	664558258	Run6	DNA	Winter 2023-2024
D-RP12	Popatpara	Rajkot	2024-02-27	1725358	369657894	Run6	DNA	Winter 2023-2024
R-RO12	Kothariya old	Rajkot	2024-02-27	8061	1721718	Run6	RNA	Winter 2023-2024
D-VA13	Atladara	Vadodara	2024-03-04	1086850	208941689	Run7	DNA	Summer 2024
D-VC13	Channi	Vadodara	2024-03-04	18981199	3911861276	Run7	DNA	Summer 2024
D-VG13	Gajarwadi	Vadodara	2024-03-04	8151648	1492971599	Run7	DNA	Summer 2024
D-VT13	Tarsali	Vadodara	2024-03-04	9284631	1702995275	Run7	DNA	Summer 2024
R-VA13	Atladara	Vadodara	2024-03-04	6249683	1319289222	Run7	RNA	Summer 2024
R-VC13	Channi	Vadodara	2024-03-04	9240858	1991840633	Run7	RNA	Summer 2024
R-VG13	Gajarwadi	Vadodara	2024-03-04	35621764	7675820110	Run7	RNA	Summer 2024
R-VT13	Tarsali	Vadodara	2024-03-04	10227785	2200900111	Run7	RNA	Summer 2024
D-AD13	Paldi	Ahmedabad	2024-03-08	4553702	945621360	Run7	DNA	Summer 2024
D-AG13	Maninagar	Ahmedabad	2024-03-08	4964497	1018066774	Run7	DNA	Summer 2024
D-AM13	Motera	Ahmedabad	2024-03-08	3067292	574585008	Run7	DNA	Summer 2024
D-AN13	Vasna MLD	Ahmedabad	2024-03-08	5519606	1108794751	Run7	DNA	Summer 2024
D-AP13	Pirana	Ahmedabad	2024-03-08	67409861	14008257505	Run7	DNA	Summer 2024
D-AR13	Ranip	Ahmedabad	2024-03-08	12726273	2646481833	Run7	DNA	Summer 2024
D-AS13	Vasna SPS	Ahmedabad	2024-03-08	55880931	11244470539	Run7	DNA	Summer 2024
D-AV13	Vinzol	Ahmedabad	2024-03-08	5935493	1207210763	Run7	DNA	Summer 2024
D-GJ13	Jaspur	Gandhinagar	2024-03-08	7885391	1657075205	Run7	DNA	Summer 2024
D-GK13	Kudasan	Gandhinagar	2024-03-08	8078668	1693847679	Run7	DNA	Summer 2024
D-GR13	Raysan	Gandhinagar	2024-03-08	13373305	2786878797	Run7	DNA	Summer 2024
D-GS13	Sargasan	Gandhinagar	2024-03-08	1724396	356118254	Run7	DNA	Summer 2024
D-GV13	Vavol	Gandhinagar	2024-03-08	12081275	2464212286	Run7	DNA	Summer 2024
R-AA13	Ambawadi	Ahmedabad	2024-03-08	3227286	695499960	Run7	RNA	Summer 2024
R-AD13	Paldi	Ahmedabad	2024-03-08	5093825	1096009600	Run7	RNA	Summer 2024
R-AG13	Maninagar	Ahmedabad	2024-03-08	8844538	1903968449	Run7	RNA	Summer 2024
R-GV13	Vavol	Gandhinagar	2024-03-08	9852238	2117757885	Run7	RNA	Summer 2024
R-AM13	Motera	Ahmedabad	2024-03-08	8057452	1729716141	Run7	RNA	Summer 2024
R-AN13	Vasna MLD	Ahmedabad	2024-03-08	2527004	542305627	Run7	RNA	Summer 2024
R-AP13	Pirana	Ahmedabad	2024-03-08	1175405	253156908	Run7	RNA	Summer 2024
R-AR13	Ranip	Ahmedabad	2024-03-08	15470370	3343300489	Run7	RNA	Summer 2024
R-AS13	Vasna SPS	Ahmedabad	2024-03-08	4113620	887436230	Run7	RNA	Summer 2024
R-AV13	Vinzol	Ahmedabad	2024-03-08	4565633	986091350	Run7	RNA	Summer 2024
R-GJ13	Jaspur	Gandhinagar	2024-03-08	13571317	2930425898	Run7	RNA	Summer 2024
R-GK13	Kudasan	Gandhinagar	2024-03-08	11466452	2472382511	Run7	RNA	Summer 2024
R-GR13	Raysan	Gandhinagar	2024-03-08	9383169	2009206044	Run7	RNA	Summer 2024
R-GS13	Sargasan	Gandhinagar	2024-03-08	12116626	2617287563	Run7	RNA	Summer 2024
D-AA13	Ambawadi	Ahmedabad	2024-03-08	4420656	893102255	Run7	DNA	Summer 2024
D-RD13	Raiyadhar	Rajkot	2024-03-13	7564746	1616666756	Run7	DNA	Summer 2024
D-RN13	Kothariya Near NH	Rajkot	2024-03-13	9264693	1903470873	Run7	DNA	Summer 2024
D-RO13	Kothariya old	Rajkot	2024-03-13	10070994	2094086733	Run7	DNA	Summer 2024
D-RP13	Popatpara	Rajkot	2024-03-13	13962382	2780059430	Run7	DNA	Summer 2024
D-RR13	Raiya	Rajkot	2024-03-13	9951051	2038613850	Run7	DNA	Summer 2024
R-RD13	Raiyadhar	Rajkot	2024-03-13	12021367	2490189443	Run7	RNA	Summer 2024
R-RN13	Kothariya Near NH	Rajkot	2024-03-13	9325107	1937074162	Run7	RNA	Summer 2024
R-RO13	Kothariya old	Rajkot	2024-03-13	7135816	1509124132	Run7	RNA	Summer 2024
R-RP13	Popatpara	Rajkot	2024-03-13	9341558	2006235946	Run7	RNA	Summer 2024
R-RR13	Raiya	Rajkot	2024-03-13	13627997	2939160153	Run7	RNA	Summer 2024
D-AD14	Paldi	Ahmedabad	2024-03-18	15053848	3223924054	Run7	DNA	Summer 2024
D-AG14	Maninagar	Ahmedabad	2024-03-18	12691859	2675097401	Run7	DNA	Summer 2024
D-AJ14	Jamalpur	Ahmedabad	2024-03-18	22291281	4613948553	Run7	DNA	Summer 2024
D-AM14	Motera	Ahmedabad	2024-03-18	27569844	5895138891	Run7	DNA	Summer 2024
D-AN14	Vasna MLD	Ahmedabad	2024-03-18	13072092	2676098426	Run7	DNA	Summer 2024
D-AP14	Pirana	Ahmedabad	2024-03-18	8458027	1651046106	Run7	DNA	Summer 2024
D-AR14	Ranip	Ahmedabad	2024-03-18	12908451	2671849471	Run7	DNA	Summer 2024
D-AS14	Vasna SPS	Ahmedabad	2024-03-18	22483171	4725578715	Run7	DNA	Summer 2024
D-AV14	Vinzol	Ahmedabad	2024-03-18	11302114	2376923256	Run7	DNA	Summer 2024
D-GJ14	Jaspur	Gandhinagar	2024-03-18	14710679	2924126713	Run7	DNA	Summer 2024
D-GK14	Kudasan	Gandhinagar	2024-03-18	12417919	2596294735	Run7	DNA	Summer 2024
D-GR14	Raysan	Gandhinagar	2024-03-18	9298286	1905510245	Run7	DNA	Summer 2024
D-GS14	Sargasan	Gandhinagar	2024-03-18	12875892	2679199658	Run7	DNA	Summer 2024
D-GV14	Vavol	Gandhinagar	2024-03-18	7239790	1481483078	Run7	DNA	Summer 2024
D-VA14	Atladara	Vadodara	2024-03-18	11282952	2281823419	Run7	DNA	Summer 2024
D-VC14	Channi	Vadodara	2024-03-18	12017345	2580138661	Run7	DNA	Summer 2024
D-VG14	Gajarwadi	Vadodara	2024-03-18	8185495	1683477553	Run7	DNA	Summer 2024
D-VT14	Tarsali	Vadodara	2024-03-18	7862701	1583255887	Run7	DNA	Summer 2024
R-AA14	Ambawadi	Ahmedabad	2024-03-18	2004886	415761799	Run7	RNA	Summer 2024
R-AD14	Paldi	Ahmedabad	2024-03-18	450919	89933998	Run7	RNA	Summer 2024
R-GS14	Sargasan	Gandhinagar	2024-03-18	8951208	1834897038	Run7	RNA	Summer 2024
R-AG14	Maninagar	Ahmedabad	2024-03-18	1255342	259058644	Run7	RNA	Summer 2024
R-AJ14	Jamalpur	Ahmedabad	2024-03-18	5440118	1120183421	Run7	RNA	Summer 2024
R-AM14	Motera	Ahmedabad	2024-03-18	4254627	868449308	Run7	RNA	Summer 2024
R-GV14	Vavol	Gandhinagar	2024-03-18	11746823	2453678406	Run7	RNA	Summer 2024
R-AN14	Vasna MLD	Ahmedabad	2024-03-18	27424114	5560273821	Run7	RNA	Summer 2024
R-AP14	Pirana	Ahmedabad	2024-03-18	10541140	2269430252	Run7	RNA	Summer 2024
R-AR14	Ranip	Ahmedabad	2024-03-18	18907757	4037733004	Run7	RNA	Summer 2024
R-AS14	Vasna SPS	Ahmedabad	2024-03-18	2800789	579000428	Run7	RNA	Summer 2024
R-AV14	Vinzol	Ahmedabad	2024-03-18	2679300	541826213	Run7	RNA	Summer 2024
R-GJ14	Jaspur	Gandhinagar	2024-03-18	14433347	2965830635	Run7	RNA	Summer 2024
R-GK14	Kudasan	Gandhinagar	2024-03-18	18948020	3988384613	Run7	RNA	Summer 2024
R-GR14	Raysan	Gandhinagar	2024-03-18	3575998	752048785	Run7	RNA	Summer 2024
R-VA14	Atladara	Vadodara	2024-03-18	6657732	1429237924	Run7	RNA	Summer 2024
R-VC14	Channi	Vadodara	2024-03-18	2460822	513634957	Run7	RNA	Summer 2024
R-VG14	Gajarwadi	Vadodara	2024-03-18	10283962	2181870190	Run7	RNA	Summer 2024
R-VT14	Tarsali	Vadodara	2024-03-18	9557171	2049157156	Run7	RNA	Summer 2024
D-AA14	Ambawadi	Ahmedabad	2024-03-18	13491181	2850635608	Run7	DNA	Summer 2024
D-RP14	Popatpara	Rajkot	2024-03-26	12041178	2425654780	Run7	DNA	Summer 2024
D-RD14	Raiyadhar	Rajkot	2024-03-26	6877316	1441078565	Run7	DNA	Summer 2024
D-RN14	Kothariya Near NH	Rajkot	2024-03-26	22567244	4559559503	Run7	DNA	Summer 2024
D-RO14	Kothariya old	Rajkot	2024-03-26	9720984	2005055191	Run7	DNA	Summer 2024
D-RR14	Raiya	Rajkot	2024-03-26	4107193	836336254	Run7	DNA	Summer 2024
R-RD14	Raiyadhar	Rajkot	2024-03-26	6019877	1296851683	Run7	RNA	Summer 2024
R-RP14	Popatpara	Rajkot	2024-03-26	7050966	1479507484	Run7	RNA	Summer 2024
R-RN14	Kothariya Near NH	Rajkot	2024-03-26	13477165	2897668893	Run7	RNA	Summer 2024
R-RO14	Kothariya old	Rajkot	2024-03-26	4213821	897790402	Run7	RNA	Summer 2024
R-RR14	Raiya	Rajkot	2024-03-26	8878329	1838969090	Run7	RNA	Summer 2024
D-VA15	Atladara	Vadodara	2024-04-01	3403093	668089217	Run8	DNA	Summer 2024
D-VC15	Channi	Vadodara	2024-04-01	2711968	536708019	Run8	DNA	Summer 2024
D-VG15	Gajarwadi	Vadodara	2024-04-01	139720	26744194	Run8	DNA	Summer 2024
D-VT15	Tarsali	Vadodara	2024-04-01	2894757	567552312	Run8	DNA	Summer 2024
R-VA15	Atladara	Vadodara	2024-04-01	29594098	5884717098	Run8	RNA	Summer 2024
R-VC15	Channi	Vadodara	2024-04-01	6723934	1312698391	Run8	RNA	Summer 2024
R-VG15	Gajarwadi	Vadodara	2024-04-01	8220808	1609724109	Run8	RNA	Summer 2024
R-VT15	Tarsali	Vadodara	2024-04-01	14472241	2864194680	Run8	RNA	Summer 2024
D-AA15	Ambawadi	Ahmedabad	2024-04-02	4483854	878036838	Run8	DNA	Summer 2024
D-AD15	Paldi	Ahmedabad	2024-04-02	4412645	866766056	Run8	DNA	Summer 2024
D-AG15	Maninagar	Ahmedabad	2024-04-02	6101904	1197724373	Run8	DNA	Summer 2024
D-AM15	Motera	Ahmedabad	2024-04-02	4398980	862567100	Run8	DNA	Summer 2024
D-AN15	Vasna MLD	Ahmedabad	2024-04-02	6709548	1319803360	Run8	DNA	Summer 2024
D-AP15	Pirana	Ahmedabad	2024-04-02	4126548	807351618	Run8	DNA	Summer 2024
D-AR15	Ranip	Ahmedabad	2024-04-02	1858515	360229126	Run8	DNA	Summer 2024
D-AS15	Vasna SPS	Ahmedabad	2024-04-02	6684198	1315787355	Run8	DNA	Summer 2024
D-AV15	Vinzol	Ahmedabad	2024-04-02	1778915	347275342	Run8	DNA	Summer 2024
D-GJ15	Jaspur	Gandhinagar	2024-04-02	639549	120837153	Run8	DNA	Summer 2024
D-GK15	Kudasan	Gandhinagar	2024-04-02	2256479	425853726	Run8	DNA	Summer 2024
D-GR15	Raysan	Gandhinagar	2024-04-02	1250418	242646099	Run8	DNA	Summer 2024
D-GS15	Sargasan	Gandhinagar	2024-04-02	4710276	901335933	Run8	DNA	Summer 2024
D-GV15	Vavol	Gandhinagar	2024-04-02	2860543	546186068	Run8	DNA	Summer 2024
D-AJ15	Jamalpur	Ahmedabad	2024-04-02	2889775	508058485	Run8	DNA	Summer 2024
R-AA15	Ambawadi	Ahmedabad	2024-04-02	249828	47772889	Run8	RNA	Summer 2024
R-AD15	Paldi	Ahmedabad	2024-04-02	5285234	1034401905	Run8	RNA	Summer 2024
R-AG15	Maninagar	Ahmedabad	2024-04-02	3352837	647853465	Run8	RNA	Summer 2024
R-AJ15	Jamalpur	Ahmedabad	2024-04-02	35007892	6846283371	Run8	RNA	Summer 2024
R-AM15	Motera	Ahmedabad	2024-04-02	13583392	2684779349	Run8	RNA	Summer 2024
R-AN15	Vasna MLD	Ahmedabad	2024-04-02	1671710	325727169	Run8	RNA	Summer 2024
R-AP15	Pirana	Ahmedabad	2024-04-02	34435542	6609974939	Run8	RNA	Summer 2024
R-AR15	Ranip	Ahmedabad	2024-04-02	34081314	6780805248	Run8	RNA	Summer 2024
R-AS15	Vasna SPS	Ahmedabad	2024-04-02	7600285	1463057332	Run8	RNA	Summer 2024
R-AV15	Vinzol	Ahmedabad	2024-04-02	5322915	1046450277	Run8	RNA	Summer 2024
R-GJ15	Jaspur	Gandhinagar	2024-04-02	1687092	326810623	Run8	RNA	Summer 2024
R-GK15	Kudasan	Gandhinagar	2024-04-02	11770701	2314835284	Run8	RNA	Summer 2024
R-GR15	Raysan	Gandhinagar	2024-04-02	23665556	4702918491	Run8	RNA	Summer 2024
R-GS15	Sargasan	Gandhinagar	2024-04-02	15930496	3157828415	Run8	RNA	Summer 2024
R-GV15	Vavol	Gandhinagar	2024-04-02	9310353	1833577249	Run8	RNA	Summer 2024
D-RD15	Raiyadhar	Rajkot	2024-04-09	881319	140844196	Run8	DNA	Summer 2024
D-RN15	Kothariya Near NH	Rajkot	2024-04-09	3312046	540316470	Run8	DNA	Summer 2024
D-RO15	Kothariya old	Rajkot	2024-04-09	3408624	626794090	Run8	DNA	Summer 2024
D-RP15	Popatpara	Rajkot	2024-04-09	219853	33348698	Run8	DNA	Summer 2024
R-RD15	Raiyadhar	Rajkot	2024-04-09	19710966	3907289125	Run8	RNA	Summer 2024
R-RN15	Kothariya Near NH	Rajkot	2024-04-09	15028767	2990482476	Run8	RNA	Summer 2024
R-RO15	Kothariya old	Rajkot	2024-04-09	13059103	2590292002	Run8	RNA	Summer 2024
R-RP15	Popatpara	Rajkot	2024-04-09	3816014	752336850	Run8	RNA	Summer 2024
D-VA16	Atladara	Vadodara	2024-04-15	1637627	302429221	Run8	DNA	Summer 2024
D-VC16	Channi	Vadodara	2024-04-15	9245926	1579022040	Run8	DNA	Summer 2024
D-VG16	Gajarwadi	Vadodara	2024-04-15	3980104	672398867	Run8	DNA	Summer 2024
D-VT16	Tarsali	Vadodara	2024-04-15	10445139	2014618222	Run8	DNA	Summer 2024
R-VA16	Atladara	Vadodara	2024-04-15	1502315	297568924	Run8	RNA	Summer 2024
R-VC16	Channi	Vadodara	2024-04-15	34886904	6878527777	Run8	RNA	Summer 2024
R-VG16	Gajarwadi	Vadodara	2024-04-15	5021365	972867547	Run8	RNA	Summer 2024
R-VT16	Tarsali	Vadodara	2024-04-15	1251203	245063097	Run8	RNA	Summer 2024
D-AA16	Ambawadi	Ahmedabad	2024-04-16	2586680	468807042	Run8	DNA	Summer 2024
D-AD16	Paldi	Ahmedabad	2024-04-16	11031048	2114020438	Run8	DNA	Summer 2024
D-AG16	Maninagar	Ahmedabad	2024-04-16	5734572	1088948522	Run8	DNA	Summer 2024
D-AJ16	Jamalpur	Ahmedabad	2024-04-16	1836587	321936208	Run8	DNA	Summer 2024
D-AM16	Motera	Ahmedabad	2024-04-16	2155843	399012011	Run8	DNA	Summer 2024
D-AN16	Vasna MLD	Ahmedabad	2024-04-16	6312640	1219602638	Run8	DNA	Summer 2024
D-AP16	Pirana	Ahmedabad	2024-04-16	2289303	455325523	Run8	DNA	Summer 2024
D-AR16	Ranip	Ahmedabad	2024-04-16	9939513	1758694980	Run8	DNA	Summer 2024
D-AS16	Vasna SPS	Ahmedabad	2024-04-16	5100397	993883808	Run8	DNA	Summer 2024
D-AV16	Vinzol	Ahmedabad	2024-04-16	6299530	1213752154	Run8	DNA	Summer 2024
D-GK16	Kudasan	Gandhinagar	2024-04-16	1848907	359208730	Run8	DNA	Summer 2024
D-GR16	Raysan	Gandhinagar	2024-04-16	11211747	2217436035	Run8	DNA	Summer 2024
D-GS16	Sargasan	Gandhinagar	2024-04-16	7089623	1333144722	Run8	DNA	Summer 2024
D-GV16	Vavol	Gandhinagar	2024-04-16	6723003	1309082744	Run8	DNA	Summer 2024
R-AA16	Ambawadi	Ahmedabad	2024-04-16	605386	116130839	Run8	RNA	Summer 2024
R-AD16	Paldi	Ahmedabad	2024-04-16	5856413	1139842997	Run8	RNA	Summer 2024
R-AG16	Maninagar	Ahmedabad	2024-04-16	7547146	1477104500	Run8	RNA	Summer 2024
R-AJ16	Jamalpur	Ahmedabad	2024-04-16	12415864	2465447727	Run8	RNA	Summer 2024
R-AM16	Motera	Ahmedabad	2024-04-16	5217319	1026177081	Run8	RNA	Summer 2024
R-AN16	Vasna MLD	Ahmedabad	2024-04-16	12851143	2526237473	Run8	RNA	Summer 2024
R-AP16	Pirana	Ahmedabad	2024-04-16	4615782	896113113	Run8	RNA	Summer 2024
R-AR16	Ranip	Ahmedabad	2024-04-16	18015957	3546574618	Run8	RNA	Summer 2024
R-AS16	Vasna SPS	Ahmedabad	2024-04-16	9963132	1973634297	Run8	RNA	Summer 2024
R-AV16	Vinzol	Ahmedabad	2024-04-16	25814679	5091966845	Run8	RNA	Summer 2024
R-GJ16	Jaspur	Gandhinagar	2024-04-16	3187199	619448847	Run8	RNA	Summer 2024
R-GK16	Kudasan	Gandhinagar	2024-04-16	4816302	927586884	Run8	RNA	Summer 2024
R-GR16	Raysan	Gandhinagar	2024-04-16	7782486	1513849644	Run8	RNA	Summer 2024
R-GS16	Sargasan	Gandhinagar	2024-04-16	4366209	855351286	Run8	RNA	Summer 2024
R-GV16	Vavol	Gandhinagar	2024-04-16	2815849	547993778	Run8	RNA	Summer 2024
D-RD16	Raiyadhar	Rajkot	2024-04-23	7552209	1378129866	Run8	DNA	Summer 2024
D-RN16	Kothariya Near NH	Rajkot	2024-04-23	553978	96792453	Run8	DNA	Summer 2024
D-RO16	Kothariya old	Rajkot	2024-04-23	4881456	811807831	Run8	DNA	Summer 2024
D-RP16	Popatpara	Rajkot	2024-04-23	2321447	421564415	Run8	DNA	Summer 2024
D-RR16	Raiya	Rajkot	2024-04-23	4874377	827436986	Run8	DNA	Summer 2024
R-RD16	Raiyadhar	Rajkot	2024-04-23	6569755	1294672207	Run8	RNA	Summer 2024
R-RN16	Kothariya Near NH	Rajkot	2024-04-23	2342798	461110221	Run8	RNA	Summer 2024
R-RO16	Kothariya old	Rajkot	2024-04-23	29672654	5850759270	Run8	RNA	Summer 2024
R-RP16	Popatpara	Rajkot	2024-04-23	16346813	3173845998	Run8	RNA	Summer 2024
R-RR16	Raiya	Rajkot	2024-04-23	7840338	1524963844	Run8	RNA	Summer 2024
D-AA17	Ambawadi	Ahmedabad	2024-05-06	4098943	842038240	Run9	DNA	Summer 2024
D-AD17	Paldi	Ahmedabad	2024-05-06	9667947	2085843367	Run9	DNA	Summer 2024
D-AG17	Maninagar	Ahmedabad	2024-05-06	3398792	734142168	Run9	DNA	Summer 2024
D-AJ17	Jamalpur	Ahmedabad	2024-05-06	9920013	2138849891	Run9	DNA	Summer 2024
D-AN17	Vasna MLD	Ahmedabad	2024-05-06	21164725	4490822683	Run9	DNA	Summer 2024
D-AP17	Pirana	Ahmedabad	2024-05-06	15333208	3176224101	Run9	DNA	Summer 2024
D-AR17	Ranip	Ahmedabad	2024-05-06	51369204	10520484508	Run9	DNA	Summer 2024
D-AS17	Vasna SPS	Ahmedabad	2024-05-06	14486142	2988245579	Run9	DNA	Summer 2024
D-AV17	Vinzol	Ahmedabad	2024-05-06	7776859	1676531170	Run9	DNA	Summer 2024
D-GJ17	Jaspur	Gandhinagar	2024-05-06	6786502	1461224341	Run9	DNA	Summer 2024
D-GK17	Kudasan	Gandhinagar	2024-05-06	10551876	2279492705	Run9	DNA	Summer 2024
D-GR17	Raysan	Gandhinagar	2024-05-06	6823271	1467674026	Run9	DNA	Summer 2024
D-GS17	Sargasan	Gandhinagar	2024-05-06	7639616	1648495982	Run9	DNA	Summer 2024
D-GV17	Vavol	Gandhinagar	2024-05-06	11559152	2496914465	Run9	DNA	Summer 2024
D-VA17	Atladara	Vadodara	2024-05-06	10861422	1963253045	Run9	DNA	Summer 2024
D-VC17	Channi	Vadodara	2024-05-06	10141655	2059430497	Run9	DNA	Summer 2024
D-VG17	Gajarwadi	Vadodara	2024-05-06	33757929	6845388740	Run9	DNA	Summer 2024
D-VT17	Tarsali	Vadodara	2024-05-06	7028631	1512374098	Run9	DNA	Summer 2024
R-AA17	Ambawadi	Ahmedabad	2024-05-06	10277435	2220610392	Run9	RNA	Summer 2024
R-AD17	Paldi	Ahmedabad	2024-05-06	4427848	956123727	Run9	RNA	Summer 2024
R-AG17	Maninagar	Ahmedabad	2024-05-06	2224373	480252321	Run9	RNA	Summer 2024
R-AJ17	Jamalpur	Ahmedabad	2024-05-06	7562884	1637103962	Run9	RNA	Summer 2024
R-AN17	Vasna MLD	Ahmedabad	2024-05-06	4784523	1032632193	Run9	RNA	Summer 2024
R-AP17	Pirana	Ahmedabad	2024-05-06	5321381	1147521510	Run9	RNA	Summer 2024
R-AR17	Ranip	Ahmedabad	2024-05-06	5757956	1240181605	Run9	RNA	Summer 2024
R-AS17	Vasna SPS	Ahmedabad	2024-05-06	4969677	1073226575	Run9	RNA	Summer 2024
R-AV17	Vinzol	Ahmedabad	2024-05-06	13278320	2872873107	Run9	RNA	Summer 2024
R-GJ17	Jaspur	Gandhinagar	2024-05-06	4461429	963801826	Run9	RNA	Summer 2024
R-GK17	Kudasan	Gandhinagar	2024-05-06	6625066	1434638666	Run9	RNA	Summer 2024
R-GR17	Raysan	Gandhinagar	2024-05-06	3584392	773508730	Run9	RNA	Summer 2024
R-GS17	Sargasan	Gandhinagar	2024-05-06	8430525	1826065690	Run9	RNA	Summer 2024
R-GV17	Vavol	Gandhinagar	2024-05-06	6699518	1447890638	Run9	RNA	Summer 2024
R-VA17	Atladara	Vadodara	2024-05-06	5582328	1208552107	Run9	RNA	Summer 2024
R-VC17	Channi	Vadodara	2024-05-06	5144334	1111221351	Run9	RNA	Summer 2024
R-VG17	Gajarwadi	Vadodara	2024-05-06	6457396	1393973102	Run9	RNA	Summer 2024
R-VT17	Tarsali	Vadodara	2024-05-06	7589178	1637858915	Run9	RNA	Summer 2024
D-RD17	Raiyadhar	Rajkot	2024-05-14	11213533	2266134280	Run9	DNA	Summer 2024
D-RN17	Kothariya Near NH	Rajkot	2024-05-14	9966750	2133209868	Run9	DNA	Summer 2024
D-RO17	Kothariya old	Rajkot	2024-05-14	7653370	1513169219	Run9	DNA	Summer 2024
D-RP17	Popatpara	Rajkot	2024-05-14	6892619	1485752562	Run9	DNA	Summer 2024
R-RD17	Raiyadhar	Rajkot	2024-05-14	5512320	1193059677	Run9	RNA	Summer 2024
R-RN17	Kothariya Near NH	Rajkot	2024-05-14	4731591	1021753165	Run9	RNA	Summer 2024
R-RO17	Kothariya old	Rajkot	2024-05-14	5410990	1168074796	Run9	RNA	Summer 2024
R-RP17	Popatpara	Rajkot	2024-05-14	5530708	1196441908	Run9	RNA	Summer 2024
D-AA18	Ambawadi	Ahmedabad	2024-05-21	4417462	940875272	Run9	DNA	Summer 2024
D-AD18	Paldi	Ahmedabad	2024-05-21	5437748	1139403666	Run9	DNA	Summer 2024
D-AG18	Maninagar	Ahmedabad	2024-05-21	3700458	777334681	Run9	DNA	Summer 2024
D-AJ18	Jamalpur	Ahmedabad	2024-05-21	3678652	779066632	Run9	DNA	Summer 2024
D-AM18	Motera	Ahmedabad	2024-05-21	4266956	906595094	Run9	DNA	Summer 2024
D-AN18	Vasna MLD	Ahmedabad	2024-05-21	5901620	1263427106	Run9	DNA	Summer 2024
D-AP18	Pirana	Ahmedabad	2024-05-21	4691322	1005528514	Run9	DNA	Summer 2024
D-AR18	Ranip	Ahmedabad	2024-05-21	4599482	990346874	Run9	DNA	Summer 2024
D-AS18	Vasna SPS	Ahmedabad	2024-05-21	5049681	1050386705	Run9	DNA	Summer 2024
D-AV18	Vinzol	Ahmedabad	2024-05-21	7370355	1581010665	Run9	DNA	Summer 2024
D-GJ18	Jaspur	Gandhinagar	2024-05-21	7066873	1524582261	Run9	DNA	Summer 2024
D-GK18	Kudasan	Gandhinagar	2024-05-21	7206323	1556841476	Run9	DNA	Summer 2024
D-GR18	Raysan	Gandhinagar	2024-05-21	4593419	972673466	Run9	DNA	Summer 2024
D-GS18	Sargasan	Gandhinagar	2024-05-21	7918234	1688602900	Run9	DNA	Summer 2024
D-GV18	Vavol	Gandhinagar	2024-05-21	6321887	1342262034	Run9	DNA	Summer 2024
D-VA18	Atladara	Vadodara	2024-05-21	16615508	3598532152	Run9	DNA	Summer 2024
D-VC18	Channi	Vadodara	2024-05-21	18630314	4009415405	Run9	DNA	Summer 2024
D-VG18	Gajarwadi	Vadodara	2024-05-21	5265406	1130531878	Run9	DNA	Summer 2024
D-VT18	Tarsali	Vadodara	2024-05-21	17867332	3857070760	Run9	DNA	Summer 2024
R-AA18	Ambawadi	Ahmedabad	2024-05-21	21122795	4574857492	Run9	RNA	Summer 2024
R-AD18	Paldi	Ahmedabad	2024-05-21	5341291	1157205108	Run9	RNA	Summer 2024
R-AG18	Maninagar	Ahmedabad	2024-05-21	4314942	933046914	Run9	RNA	Summer 2024
R-AJ18	Jamalpur	Ahmedabad	2024-05-21	15394543	3333139843	Run9	RNA	Summer 2024
R-AM18	Motera	Ahmedabad	2024-05-21	5886209	1272653499	Run9	RNA	Summer 2024
R-AN18	Vasna MLD	Ahmedabad	2024-05-21	10466983	2265105964	Run9	RNA	Summer 2024
R-AP18	Pirana	Ahmedabad	2024-05-21	10962039	2365781058	Run9	RNA	Summer 2024
R-AR18	Ranip	Ahmedabad	2024-05-21	6714512	1449173314	Run9	RNA	Summer 2024
R-AS18	Vasna SPS	Ahmedabad	2024-05-21	7282418	1571120575	Run9	RNA	Summer 2024
R-AV18	Vinzol	Ahmedabad	2024-05-21	11958807	2586431044	Run9	RNA	Summer 2024
R-GJ18	Jaspur	Gandhinagar	2024-05-21	6894306	1494854082	Run9	RNA	Summer 2024
R-GK18	Kudasan	Gandhinagar	2024-05-21	7502088	1624219831	Run9	RNA	Summer 2024
R-GR18	Raysan	Gandhinagar	2024-05-21	7703146	1661903590	Run9	RNA	Summer 2024
R-GS18	Sargasan	Gandhinagar	2024-05-21	10576829	2279867510	Run9	RNA	Summer 2024
R-GV18	Vavol	Gandhinagar	2024-05-21	5693250	1230472142	Run9	RNA	Summer 2024
R-VA18	Atladara	Vadodara	2024-05-21	7758709	1678475861	Run9	RNA	Summer 2024
R-VC18	Channi	Vadodara	2024-05-21	24326687	5277215494	Run9	RNA	Summer 2024
R-VG18	Gajarwadi	Vadodara	2024-05-21	7310123	1583795815	Run9	RNA	Summer 2024
R-VT18	Tarsali	Vadodara	2024-05-21	10397806	2252969539	Run9	RNA	Summer 2024
D-RD18	Raiyadhar	Rajkot	2024-05-28	7187343	1504945218	Run9	DNA	Summer 2024
D-RN18	Kothariya Near NH	Rajkot	2024-05-28	9797773	2086468739	Run9	DNA	Summer 2024
D-RO18	Kothariya old	Rajkot	2024-05-28	5752519	1211565518	Run9	DNA	Summer 2024
D-RP18	Popatpara	Rajkot	2024-05-28	12851816	2665641345	Run9	DNA	Summer 2024
D-RR18	Raiya	Rajkot	2024-05-28	10948121	2364681962	Run9	DNA	Summer 2024
R-RD18	Raiyadhar	Rajkot	2024-05-28	10301204	2220862570	Run9	RNA	Summer 2024
R-RN18	Kothariya Near NH	Rajkot	2024-05-28	11076827	2398931146	Run9	RNA	Summer 2024
R-RO18	Kothariya old	Rajkot	2024-05-28	10104082	2186898100	Run9	RNA	Summer 2024
R-RP18	Popatpara	Rajkot	2024-05-28	9137638	1974458247	Run9	RNA	Summer 2024
R-RR18	Raiya	Rajkot	2024-05-28	12254452	2651745079	Run9	RNA	Summer 2024
D-VA19	Atladara	Vadodara	2024-06-03	16993263	3638862479	Run10	DNA	Monsoon 2024
D-VC19	Channi	Vadodara	2024-06-03	5589242	1208351350	Run10	DNA	Monsoon 2024
D-VG19	Gajarwadi	Vadodara	2024-06-03	15457156	3326924092	Run10	DNA	Monsoon 2024
D-VT19	Tarsali	Vadodara	2024-06-03	10055366	2177409192	Run10	DNA	Monsoon 2024
R-VA19	Atladara	Vadodara	2024-06-03	5478252	1185838687	Run10	RNA	Monsoon 2024
R-VC19	Channi	Vadodara	2024-06-03	6710887	1453500530	Run10	RNA	Monsoon 2024
R-VG19	Gajarwadi	Vadodara	2024-06-03	6990005	1513109009	Run10	RNA	Monsoon 2024
R-VT19	Tarsali	Vadodara	2024-06-03	5332003	1154781216	Run10	RNA	Monsoon 2024
D-AA19	Ambawadi	Ahmedabad	2024-06-05	14906601	3203289428	Run10	DNA	Monsoon 2024
D-AD19	Paldi	Ahmedabad	2024-06-05	10515261	2263117879	Run10	DNA	Monsoon 2024
D-AG19	Maninagar	Ahmedabad	2024-06-05	11267179	2426976441	Run10	DNA	Monsoon 2024
D-AJ19	Jamalpur	Ahmedabad	2024-06-05	12999211	2793117976	Run10	DNA	Monsoon 2024
D-AM19	Motera	Ahmedabad	2024-06-05	8971886	1934221027	Run10	DNA	Monsoon 2024
D-AN19	Vasna MLD	Ahmedabad	2024-06-05	8063315	1720275912	Run10	DNA	Monsoon 2024
D-AP19	Pirana	Ahmedabad	2024-06-05	7118740	1532289560	Run10	DNA	Monsoon 2024
D-AR19	Ranip	Ahmedabad	2024-06-05	11448749	2475122442	Run10	DNA	Monsoon 2024
D-AS19	Vasna SPS	Ahmedabad	2024-06-05	7999472	1693614904	Run10	DNA	Monsoon 2024
D-AV19	Vinzol	Ahmedabad	2024-06-05	9425989	2019525817	Run10	DNA	Monsoon 2024
D-GJ19	Jaspur	Gandhinagar	2024-06-05	7022854	1518208802	Run10	DNA	Monsoon 2024
D-GK19	Kudasan	Gandhinagar	2024-06-05	7235259	1559218644	Run10	DNA	Monsoon 2024
D-GR19	Raysan	Gandhinagar	2024-06-05	9350961	2026811437	Run10	DNA	Monsoon 2024
D-GS19	Sargasan	Gandhinagar	2024-06-05	7856069	1699281941	Run10	DNA	Monsoon 2024
D-GV19	Vavol	Gandhinagar	2024-06-05	13180018	2856986976	Run10	DNA	Monsoon 2024
R-AA19	Ambawadi	Ahmedabad	2024-06-05	7997748	1730751111	Run10	RNA	Monsoon 2024
R-AD19	Paldi	Ahmedabad	2024-06-05	6457557	1396014219	Run10	RNA	Monsoon 2024
R-AG19	Maninagar	Ahmedabad	2024-06-05	6646862	1436255061	Run10	RNA	Monsoon 2024
R-AJ19	Jamalpur	Ahmedabad	2024-06-05	10735018	2319285637	Run10	RNA	Monsoon 2024
R-AM19	Motera	Ahmedabad	2024-06-05	12865955	2784712176	Run10	RNA	Monsoon 2024
R-AN19	Vasna MLD	Ahmedabad	2024-06-05	5812575	1259620891	Run10	RNA	Monsoon 2024
R-AP19	Pirana	Ahmedabad	2024-06-05	7394287	1599421610	Run10	RNA	Monsoon 2024
R-AR19	Ranip	Ahmedabad	2024-06-05	5572749	1207256805	Run10	RNA	Monsoon 2024
R-AS19	Vasna SPS	Ahmedabad	2024-06-05	7524863	1621036208	Run10	RNA	Monsoon 2024
R-AV19	Vinzol	Ahmedabad	2024-06-05	11190225	2420014127	Run10	RNA	Monsoon 2024
R-GJ19	Jaspur	Gandhinagar	2024-06-05	8707134	1886386899	Run10	RNA	Monsoon 2024
R-GK19	Kudasan	Gandhinagar	2024-06-05	3903515	844535560	Run10	RNA	Monsoon 2024
R-GR19	Raysan	Gandhinagar	2024-06-05	4672854	1012152267	Run10	RNA	Monsoon 2024
R-GS19	Sargasan	Gandhinagar	2024-06-05	8965295	1942154459	Run10	RNA	Monsoon 2024
R-GV19	Vavol	Gandhinagar	2024-06-05	3675741	795984167	Run10	RNA	Monsoon 2024
D-RD19	Raiyadhar	Rajkot	2024-06-11	12452237	2689612849	Run10	DNA	Monsoon 2024
D-RN19	Kothariya Near NH	Rajkot	2024-06-11	11869304	2561973488	Run10	DNA	Monsoon 2024
D-RP19	Popatpara	Rajkot	2024-06-11	6468134	1395087064	Run10	DNA	Monsoon 2024
D-RR19	Raiya	Rajkot	2024-06-11	8365337	1807726775	Run10	DNA	Monsoon 2024
R-RD19	Raiyadhar	Rajkot	2024-06-11	5528763	1197566364	Run10	RNA	Monsoon 2024
R-RN19	Kothariya Near NH	Rajkot	2024-06-11	4413718	954736996	Run10	RNA	Monsoon 2024
R-RO19	Kothariya old	Rajkot	2024-06-11	3508395	759071861	Run10	RNA	Monsoon 2024
R-RP19	Popatpara	Rajkot	2024-06-11	9106816	1972197429	Run10	RNA	Monsoon 2024
R-RR19	Raiya	Rajkot	2024-06-11	12508778	2709786514	Run10	RNA	Monsoon 2024
D-VA20	Atladara	Vadodara	2024-06-17	3628279	786156968	Run11	DNA	Monsoon 2024
D-VC20	Channi	Vadodara	2024-06-17	14451647	3134912855	Run11	DNA	Monsoon 2024
D-VG20	Gajarwadi	Vadodara	2024-06-17	6118836	1327715041	Run11	DNA	Monsoon 2024
D-VT20	Tarsali	Vadodara	2024-06-17	3864392	834999304	Run11	DNA	Monsoon 2024
R-VA20	Atladara	Vadodara	2024-06-17	16979299	3679859032	Run11	RNA	Monsoon 2024
R-VC20	Channi	Vadodara	2024-06-17	7629886	1655320674	Run11	RNA	Monsoon 2024
R-VG20	Gajarwadi	Vadodara	2024-06-17	2131721	462416889	Run11	RNA	Monsoon 2024
R-VT20	Tarsali	Vadodara	2024-06-17	30417257	6586381247	Run11	RNA	Monsoon 2024
D-AA20	Ambawadi	Ahmedabad	2024-06-20	6645118	1434968067	Run10	DNA	Monsoon 2024
D-AG20	Maninagar	Ahmedabad	2024-06-20	9243529	2000996815	Run10	DNA	Monsoon 2024
D-AJ20	Jamalpur	Ahmedabad	2024-06-20	10079255	2181734995	Run10	DNA	Monsoon 2024
D-AN20	Vasna MLD	Ahmedabad	2024-06-20	6585836	1426678522	Run10	DNA	Monsoon 2024
D-AP20	Pirana	Ahmedabad	2024-06-20	5499875	1192419668	Run10	DNA	Monsoon 2024
D-AS20	Vasna SPS	Ahmedabad	2024-06-20	9052575	1961348401	Run10	DNA	Monsoon 2024
D-AV20	Vinzol	Ahmedabad	2024-06-20	6369776	1379049695	Run10	DNA	Monsoon 2024
R-AA20	Ambawadi	Ahmedabad	2024-06-20	4348824	940662798	Run10	RNA	Monsoon 2024
R-AG20	Maninagar	Ahmedabad	2024-06-20	11116032	2407533688	Run10	RNA	Monsoon 2024
R-AJ20	Jamalpur	Ahmedabad	2024-06-20	10570405	2287482325	Run10	RNA	Monsoon 2024
R-AN20	Vasna MLD	Ahmedabad	2024-06-20	10245738	2215506098	Run10	RNA	Monsoon 2024
R-AP20	Pirana	Ahmedabad	2024-06-20	16099664	3489122235	Run10	RNA	Monsoon 2024
R-AS20	Vasna SPS	Ahmedabad	2024-06-20	13204059	2856481410	Run10	RNA	Monsoon 2024
R-AV20	Vinzol	Ahmedabad	2024-06-20	15992942	3464914867	Run10	RNA	Monsoon 2024
D-AD20	Paldi	Ahmedabad	2024-06-20	4737111	1027748061	Run11	DNA	Monsoon 2024
D-AM20	Motera	Ahmedabad	2024-06-20	6498336	1409111466	Run11	DNA	Monsoon 2024
D-AR20	Ranip	Ahmedabad	2024-06-20	2888359	626855565	Run11	DNA	Monsoon 2024
D-GJ20	Jaspur	Gandhinagar	2024-06-20	3196659	691263297	Run11	DNA	Monsoon 2024
D-GK20	Kudasan	Gandhinagar	2024-06-20	6787670	1470555924	Run11	DNA	Monsoon 2024
D-GR20	Raysan	Gandhinagar	2024-06-20	9219713	1995892225	Run11	DNA	Monsoon 2024
D-GS20	Sargasan	Gandhinagar	2024-06-20	7319534	1571138343	Run11	DNA	Monsoon 2024
D-GV20	Vavol	Gandhinagar	2024-06-20	7592570	1643816663	Run11	DNA	Monsoon 2024
R-AD20	Paldi	Ahmedabad	2024-06-20	3563871	771425912	Run11	RNA	Monsoon 2024
R-AM20	Motera	Ahmedabad	2024-06-20	4529135	981485590	Run11	RNA	Monsoon 2024
R-AR20	Ranip	Ahmedabad	2024-06-20	9064031	1963078524	Run11	RNA	Monsoon 2024
R-GJ20	Jaspur	Gandhinagar	2024-06-20	3368902	729796507	Run11	RNA	Monsoon 2024
R-GK20	Kudasan	Gandhinagar	2024-06-20	5590999	1210962638	Run11	RNA	Monsoon 2024
R-GR20	Raysan	Gandhinagar	2024-06-20	14228862	3082359375	Run11	RNA	Monsoon 2024
R-GS20	Sargasan	Gandhinagar	2024-06-20	3941284	852666607	Run11	RNA	Monsoon 2024
R-GV20	Vavol	Gandhinagar	2024-06-20	6284943	1362240241	Run11	RNA	Monsoon 2024
D-RD20	Raiyadhar	Rajkot	2024-06-25	4558653	966071529	Run11	DNA	Monsoon 2024
D-RN20	Kothariya Near NH	Rajkot	2024-06-25	2376404	502174024	Run11	DNA	Monsoon 2024
D-RO20	Kothariya old	Rajkot	2024-06-25	2008304	423625162	Run11	DNA	Monsoon 2024
D-RP20	Popatpara	Rajkot	2024-06-25	8457293	1825054400	Run11	DNA	Monsoon 2024
D-RR20	Raiya	Rajkot	2024-06-25	3663640	777221168	Run11	DNA	Monsoon 2024
R-RD20	Raiyadhar	Rajkot	2024-06-25	4277630	926740860	Run11	RNA	Monsoon 2024
R-RN20	Kothariya Near NH	Rajkot	2024-06-25	2049344	441773019	Run11	RNA	Monsoon 2024
R-RO20	Kothariya old	Rajkot	2024-06-25	2731182	590526622	Run11	RNA	Monsoon 2024
R-RP20	Popatpara	Rajkot	2024-06-25	7584422	1644493007	Run11	RNA	Monsoon 2024
R-RR20	Raiya	Rajkot	2024-06-25	3457014	749970553	Run11	RNA	Monsoon 2024
D-VC21	Channi	Vadodara	2024-07-01	3073511	632525225	Run11	DNA	Monsoon 2024
D-VG21	Gajarwadi	Vadodara	2024-07-01	17108132	3670072072	Run11	DNA	Monsoon 2024
D-VT21	Tarsali	Vadodara	2024-07-01	15261829	3305485952	Run11	DNA	Monsoon 2024
R-VC21	Channi	Vadodara	2024-07-01	9416584	2041929499	Run11	RNA	Monsoon 2024
R-VG21	Gajarwadi	Vadodara	2024-07-01	4718224	1023181874	Run11	RNA	Monsoon 2024
R-VT21	Tarsali	Vadodara	2024-07-01	11222706	2432154683	Run11	RNA	Monsoon 2024
D-AA21	Ambawadi	Ahmedabad	2024-07-03	6996251	1499711670	Run11	DNA	Monsoon 2024
D-AD21	Paldi	Ahmedabad	2024-07-03	4662411	1007476261	Run11	DNA	Monsoon 2024
D-AG21	Maninagar	Ahmedabad	2024-07-03	10350896	2239272351	Run11	DNA	Monsoon 2024
D-AJ21	Jamalpur	Ahmedabad	2024-07-03	4582070	990375453	Run11	DNA	Monsoon 2024
D-AN21	Vasna MLD	Ahmedabad	2024-07-03	5905817	1278087153	Run11	DNA	Monsoon 2024
D-AP21	Pirana	Ahmedabad	2024-07-03	4423858	923550257	Run11	DNA	Monsoon 2024
D-AR21	Ranip	Ahmedabad	2024-07-03	2180620	473135799	Run11	DNA	Monsoon 2024
D-AS21	Vasna SPS	Ahmedabad	2024-07-03	5686130	1213592553	Run11	DNA	Monsoon 2024
D-AV21	Vinzol	Ahmedabad	2024-07-03	15246968	3300093470	Run11	DNA	Monsoon 2024
D-GJ21	Jaspur	Gandhinagar	2024-07-03	2676544	580256434	Run11	DNA	Monsoon 2024
D-GK21	Kudasan	Gandhinagar	2024-07-03	9231110	1974479845	Run11	DNA	Monsoon 2024
D-GR21	Raysan	Gandhinagar	2024-07-03	4959607	1073526603	Run11	DNA	Monsoon 2024
D-GS21	Sargasan	Gandhinagar	2024-07-03	3797258	821799858	Run11	DNA	Monsoon 2024
D-GV21	Vavol	Gandhinagar	2024-07-03	2489948	539127211	Run11	DNA	Monsoon 2024
R-AA21	Ambawadi	Ahmedabad	2024-07-03	3672749	796242157	Run11	RNA	Monsoon 2024
R-AD21	Paldi	Ahmedabad	2024-07-03	2052455	444986196	Run11	RNA	Monsoon 2024
R-AG21	Maninagar	Ahmedabad	2024-07-03	3914760	848595628	Run11	RNA	Monsoon 2024
R-AJ21	Jamalpur	Ahmedabad	2024-07-03	6636029	1438705311	Run11	RNA	Monsoon 2024
R-AN21	Vasna MLD	Ahmedabad	2024-07-03	3780796	820011595	Run11	RNA	Monsoon 2024
R-AP21	Pirana	Ahmedabad	2024-07-03	6849425	1485329894	Run11	RNA	Monsoon 2024
R-AR21	Ranip	Ahmedabad	2024-07-03	3349870	726748346	Run11	RNA	Monsoon 2024
R-AS21	Vasna SPS	Ahmedabad	2024-07-03	5650314	1225329013	Run11	RNA	Monsoon 2024
R-AV21	Vinzol	Ahmedabad	2024-07-03	4507953	975003058	Run11	RNA	Monsoon 2024
R-GJ21	Jaspur	Gandhinagar	2024-07-03	1920145	416347998	Run11	RNA	Monsoon 2024
R-GK21	Kudasan	Gandhinagar	2024-07-03	3622994	785915475	Run11	RNA	Monsoon 2024
R-GR21	Raysan	Gandhinagar	2024-07-03	3180376	689790160	Run11	RNA	Monsoon 2024
R-GS21	Sargasan	Gandhinagar	2024-07-03	2329681	505167595	Run11	RNA	Monsoon 2024
R-GV21	Vavol	Gandhinagar	2024-07-03	2050404	444770801	Run11	RNA	Monsoon 2024
D-RD21	Raiyadhar	Rajkot	2024-07-09	5255468	1135738440	Run11	DNA	Monsoon 2024
D-RN21	Kothariya Near NH	Rajkot	2024-07-09	7180034	1553270316	Run11	DNA	Monsoon 2024
D-RO21	Kothariya old	Rajkot	2024-07-09	9038644	1932877735	Run11	DNA	Monsoon 2024
D-RP21	Popatpara	Rajkot	2024-07-09	7689749	1666341125	Run11	DNA	Monsoon 2024
D-RR21	Raiya	Rajkot	2024-07-09	8236572	1775654031	Run11	DNA	Monsoon 2024
R-RD21	Raiyadhar	Rajkot	2024-07-09	7036190	1525334939	Run11	RNA	Monsoon 2024
R-RN21	Kothariya Near NH	Rajkot	2024-07-09	4341925	940604516	Run11	RNA	Monsoon 2024
R-RO21	Kothariya old	Rajkot	2024-07-09	3532969	765496107	Run11	RNA	Monsoon 2024
R-RP21	Popatpara	Rajkot	2024-07-09	6763821	1466797355	Run11	RNA	Monsoon 2024
R-RR21	Raiya	Rajkot	2024-07-09	3841262	832823301	Run11	RNA	Monsoon 2024
D-AA22	Ambawadi	Ahmedabad	2024-07-16	1706231	359520091	Run11	DNA	Monsoon 2024
D-AG22	Maninagar	Ahmedabad	2024-07-16	1073765	232350535	Run11	DNA	Monsoon 2024
D-AJ22	Jamalpur	Ahmedabad	2024-07-16	3633801	786655062	Run11	DNA	Monsoon 2024
D-AM22	Motera	Ahmedabad	2024-07-16	1465056	317469913	Run11	DNA	Monsoon 2024
D-AN22	Vasna MLD	Ahmedabad	2024-07-16	2568152	555396924	Run11	DNA	Monsoon 2024
D-AP22	Pirana	Ahmedabad	2024-07-16	2565250	555845097	Run11	DNA	Monsoon 2024
D-AR22	Ranip	Ahmedabad	2024-07-16	1311641	284371048	Run11	DNA	Monsoon 2024
D-AV22	Vinzol	Ahmedabad	2024-07-16	3129778	673592111	Run11	DNA	Monsoon 2024
R-AG22	Maninagar	Ahmedabad	2024-07-16	9295855	2015646048	Run11	RNA	Monsoon 2024
R-AJ22	Jamalpur	Ahmedabad	2024-07-16	30732082	6662626387	Run11	RNA	Monsoon 2024
R-AM22	Motera	Ahmedabad	2024-07-16	1655629	358892052	Run11	RNA	Monsoon 2024
R-AN22	Vasna MLD	Ahmedabad	2024-07-16	14426046	3127496627	Run11	RNA	Monsoon 2024
R-AP22	Pirana	Ahmedabad	2024-07-16	7222073	1565912839	Run11	RNA	Monsoon 2024
R-AR22	Ranip	Ahmedabad	2024-07-16	1695713	367595810	Run11	RNA	Monsoon 2024
R-AV22	Vinzol	Ahmedabad	2024-07-16	36862780	7989819232	Run11	RNA	Monsoon 2024
D-AA23	Ambawadi	Ahmedabad	2024-08-06	17716543	3844336364	Run12	DNA	Monsoon 2024
D-AA24	Ambawadi	Ahmedabad	2024-08-21	13180294	2857259702	Run12	DNA	Monsoon 2024
D-AD23	Paldi	Ahmedabad	2024-08-06	8233226	1782730727	Run12	DNA	Monsoon 2024
D-AD24	Paldi	Ahmedabad	2024-08-21	6064318	1262132371	Run12	DNA	Monsoon 2024
D-AG23	Maninagar	Ahmedabad	2024-08-06	18965865	4107057397	Run12	DNA	Monsoon 2024
D-AG24	Maninagar	Ahmedabad	2024-08-21	11026871	2390412124	Run12	DNA	Monsoon 2024
D-AJ23	Jamalpur	Ahmedabad	2024-08-06	13249016	2855511982	Run12	DNA	Monsoon 2024
D-AJ24	Jamalpur	Ahmedabad	2024-08-21	13545177	2936490306	Run12	DNA	Monsoon 2024
D-AM23	Motera	Ahmedabad	2024-08-06	3763249	791325603	Run12	DNA	Monsoon 2024
D-AM24	Motera	Ahmedabad	2024-08-21	8631843	1817247700	Run12	DNA	Monsoon 2024
D-AN23	Vasna MLD	Ahmedabad	2024-08-06	24545287	5296028151	Run12	DNA	Monsoon 2024
D-AN24	Vasna MLD	Ahmedabad	2024-08-21	8716468	1830298773	Run12	DNA	Monsoon 2024
D-AP23	Pirana	Ahmedabad	2024-08-06	25980166	5601792327	Run12	DNA	Monsoon 2024
D-AP24	Pirana	Ahmedabad	2024-08-21	21868314	4746938075	Run12	DNA	Monsoon 2024
D-AR23	Ranip	Ahmedabad	2024-08-06	15878927	3435305460	Run12	DNA	Monsoon 2024
D-AR24	Ranip	Ahmedabad	2024-08-21	11817051	2553961168	Run12	DNA	Monsoon 2024
D-AS23	Vasna SPS	Ahmedabad	2024-08-06	5918086	1282687861	Run12	DNA	Monsoon 2024
D-AS24	Vasna SPS	Ahmedabad	2024-08-21	15724491	3394252784	Run12	DNA	Monsoon 2024
D-AV23	Vinzol	Ahmedabad	2024-08-06	31601006	6837175882	Run12	DNA	Monsoon 2024
D-AV24	Vinzol	Ahmedabad	2024-08-21	13641855	2958999619	Run12	DNA	Monsoon 2024
D-GJ23	Jaspur	Gandhinagar	2024-08-06	8998135	1942900892	Run12	DNA	Monsoon 2024
D-GJ24	Jaspur	Gandhinagar	2024-08-21	4333667	939713111	Run12	DNA	Monsoon 2024
D-GK23	Kudasan	Gandhinagar	2024-08-06	14851238	3207943063	Run12	DNA	Monsoon 2024
D-GK24	Kudasan	Gandhinagar	2024-08-21	11922020	2586068116	Run12	DNA	Monsoon 2024
D-GR23	Raysan	Gandhinagar	2024-08-06	20322528	4393380108	Run12	DNA	Monsoon 2024
D-GR24	Raysan	Gandhinagar	2024-08-21	13661060	2960215003	Run12	DNA	Monsoon 2024
D-GS23	Sargasan	Gandhinagar	2024-08-06	28436314	6135365098	Run12	DNA	Monsoon 2024
D-GS24	Sargasan	Gandhinagar	2024-08-21	15763309	3414693186	Run12	DNA	Monsoon 2024
D-GV23	Vavol	Gandhinagar	2024-08-06	13445877	2895446020	Run12	DNA	Monsoon 2024
D-GV24	Vavol	Gandhinagar	2024-08-21	11455745	2484569801	Run12	DNA	Monsoon 2024
D-RN23	Kothariya Near NH	Rajkot	2024-08-13	12616450	2731586649	Run12	DNA	Monsoon 2024
D-RO23	Kothariya old	Rajkot	2024-08-13	13129368	2844673109	Run12	DNA	Monsoon 2024
D-RP23	Popatpara	Rajkot	2024-08-13	9731435	2106771914	Run12	DNA	Monsoon 2024
D-RR23	Raiya	Rajkot	2024-08-13	14027444	3037358916	Run12	DNA	Monsoon 2024
D-VA23	Atladara	Vadodara	2024-08-06	13772361	2988170306	Run12	DNA	Monsoon 2024
D-VA24	Atladara	Vadodara	2024-08-20	15857137	3433237374	Run12	DNA	Monsoon 2024
D-VC23	Channi	Vadodara	2024-08-06	15640824	3372649793	Run12	DNA	Monsoon 2024
D-VC24	Channi	Vadodara	2024-08-20	15124357	3253171218	Run12	DNA	Monsoon 2024
D-VG23	Gajarwadi	Vadodara	2024-08-06	26433850	5722182531	Run12	DNA	Monsoon 2024
D-VG24	Gajarwadi	Vadodara	2024-08-20	15707882	3390236369	Run12	DNA	Monsoon 2024
D-VT23	Tarsali	Vadodara	2024-08-06	16673883	3607920694	Run12	DNA	Monsoon 2024
D-VT24	Tarsali	Vadodara	2024-08-20	18159198	3931546489	Run12	DNA	Monsoon 2024
R-AA23	Ambawadi	Ahmedabad	2024-08-06	10385406	2248157690	Run12	RNA	Monsoon 2024
R-AA24	Ambawadi	Ahmedabad	2024-08-21	3756646	813806997	Run12	RNA	Monsoon 2024
R-AD23	Paldi	Ahmedabad	2024-08-06	9959418	2153900139	Run12	RNA	Monsoon 2024
R-AD24	Paldi	Ahmedabad	2024-08-21	3040635	639047232	Run12	RNA	Monsoon 2024
R-AG23	Maninagar	Ahmedabad	2024-08-06	13013420	2821362287	Run12	RNA	Monsoon 2024
R-AG24	Maninagar	Ahmedabad	2024-08-21	15841112	3432947935	Run12	RNA	Monsoon 2024
R-AJ23	Jamalpur	Ahmedabad	2024-08-06	14009148	3035774167	Run12	RNA	Monsoon 2024
R-AJ24	Jamalpur	Ahmedabad	2024-08-21	17238883	3736117382	Run12	RNA	Monsoon 2024
R-AM23	Motera	Ahmedabad	2024-08-06	22214573	4813714514	Run12	RNA	Monsoon 2024
R-AM24	Motera	Ahmedabad	2024-08-21	9993460	2163558865	Run12	RNA	Monsoon 2024
R-AN23	Vasna MLD	Ahmedabad	2024-08-06	6362114	1379357280	Run12	RNA	Monsoon 2024
R-AP23	Pirana	Ahmedabad	2024-08-06	3956743	856116403	Run12	RNA	Monsoon 2024
R-AP24	Pirana	Ahmedabad	2024-08-21	10835845	2349308000	Run12	RNA	Monsoon 2024
R-AR23	Ranip	Ahmedabad	2024-08-06	5602344	1210774390	Run12	RNA	Monsoon 2024
R-AR24	Ranip	Ahmedabad	2024-08-21	24569506	5330531032	Run12	RNA	Monsoon 2024
R-AS23	Vasna SPS	Ahmedabad	2024-08-06	4402312	953095768	Run12	RNA	Monsoon 2024
R-AS24	Vasna SPS	Ahmedabad	2024-08-21	25795885	5591225704	Run12	RNA	Monsoon 2024
R-AV23	Vinzol	Ahmedabad	2024-08-06	8334172	1802524288	Run12	RNA	Monsoon 2024
R-AV24	Vinzol	Ahmedabad	2024-08-21	15650386	3392620279	Run12	RNA	Monsoon 2024
R-GJ23	Jaspur	Gandhinagar	2024-08-06	11005020	2382704322	Run12	RNA	Monsoon 2024
R-GJ24	Jaspur	Gandhinagar	2024-08-21	13090532	2839981272	Run12	RNA	Monsoon 2024
R-GK23	Kudasan	Gandhinagar	2024-08-06	12769744	2762851286	Run12	RNA	Monsoon 2024
R-GK24	Kudasan	Gandhinagar	2024-08-21	5396389	1169550325	Run12	RNA	Monsoon 2024
R-GR23	Raysan	Gandhinagar	2024-08-06	11745383	2541474746	Run12	RNA	Monsoon 2024
R-GR24	Raysan	Gandhinagar	2024-08-21	9655587	2094693187	Run12	RNA	Monsoon 2024
R-GS23	Sargasan	Gandhinagar	2024-08-06	5039595	1086286580	Run12	RNA	Monsoon 2024
R-GS24	Sargasan	Gandhinagar	2024-08-21	10001763	2171574827	Run12	RNA	Monsoon 2024
R-GV23	Vavol	Gandhinagar	2024-08-06	7848210	1698457801	Run12	RNA	Monsoon 2024
R-GV24	Vavol	Gandhinagar	2024-08-21	4934415	1070436094	Run12	RNA	Monsoon 2024
R-RN23	Kothariya Near NH	Rajkot	2024-08-13	6299447	1365537794	Run12	RNA	Monsoon 2024
R-RO23	Kothariya old	Rajkot	2024-08-13	3259603	704494296	Run12	RNA	Monsoon 2024
R-RP23	Popatpara	Rajkot	2024-08-13	3134898	655889340	Run12	RNA	Monsoon 2024
R-RR23	Raiya	Rajkot	2024-08-13	3248833	703664104	Run12	RNA	Monsoon 2024
R-VA23	Atladara	Vadodara	2024-08-06	8232389	1778728115	Run12	RNA	Monsoon 2024
R-VA24	Atladara	Vadodara	2024-08-20	42249615	9156743429	Run12	RNA	Monsoon 2024
R-VC23	Channi	Vadodara	2024-08-06	30729798	6655485370	Run12	RNA	Monsoon 2024
R-VC24	Channi	Vadodara	2024-08-20	19425467	4212836688	Run12	RNA	Monsoon 2024
R-VG23	Gajarwadi	Vadodara	2024-08-06	10429943	2253410273	Run12	RNA	Monsoon 2024
R-VG24	Gajarwadi	Vadodara	2024-08-20	41501556	8994252016	Run12	RNA	Monsoon 2024
R-VT23	Tarsali	Vadodara	2024-08-06	10669807	2308971234	Run12	RNA	Monsoon 2024
R-VT24	Tarsali	Vadodara	2024-08-20	28952914	6245981225	Run12	RNA	Monsoon 2024
D-AA26	Ambawadi	Ahmedabad	2024-09-20	8100262	1741641698	Run13	DNA	Monsoon 2024
D-AD25	Paldi	Ahmedabad	2024-09-04	10023995	2177187286	Run13	DNA	Monsoon 2024
D-AD26	Paldi	Ahmedabad	2024-09-20	5099022	1107688825	Run13	DNA	Monsoon 2024
D-AG25	Maninagar	Ahmedabad	2024-09-04	8454032	1836266095	Run13	DNA	Monsoon 2024
D-AG26	Maninagar	Ahmedabad	2024-09-20	2337334	493080346	Run13	DNA	Monsoon 2024
D-AJ25	Jamalpur	Ahmedabad	2024-09-04	14747280	3203056476	Run13	DNA	Monsoon 2024
D-AJ26	Jamalpur	Ahmedabad	2024-09-20	8940452	1924495562	Run13	DNA	Monsoon 2024
D-AM25	Motera	Ahmedabad	2024-09-04	7584556	1647548964	Run13	DNA	Monsoon 2024
D-AM26	Motera	Ahmedabad	2024-09-20	13681138	2971487590	Run13	DNA	Monsoon 2024
D-AN25	Vasna MLD	Ahmedabad	2024-09-04	11773525	2557430296	Run13	DNA	Monsoon 2024
D-AN26	Vasna MLD	Ahmedabad	2024-09-20	12961152	2814975563	Run13	DNA	Monsoon 2024
D-AP25	Pirana	Ahmedabad	2024-09-04	11368680	2468087113	Run13	DNA	Monsoon 2024
D-AP26	Pirana	Ahmedabad	2024-09-20	13426867	2915733375	Run13	DNA	Monsoon 2024
D-AR25	Ranip	Ahmedabad	2024-09-04	15966743	3468964725	Run13	DNA	Monsoon 2024
D-AR26	Ranip	Ahmedabad	2024-09-20	4418734	949736715	Run13	DNA	Monsoon 2024
D-AS25	Vasna SPS	Ahmedabad	2024-09-04	8268832	1796581417	Run13	DNA	Monsoon 2024
D-AS26	Vasna SPS	Ahmedabad	2024-09-20	29243427	6354962104	Run13	DNA	Monsoon 2024
D-AV25	Vinzol	Ahmedabad	2024-09-04	15419899	3348669467	Run13	DNA	Monsoon 2024
D-AV26	Vinzol	Ahmedabad	2024-09-20	35333132	7672796038	Run13	DNA	Monsoon 2024
D-GJ25	Jaspur	Gandhinagar	2024-09-04	14840431	3223719304	Run13	DNA	Monsoon 2024
D-GJ26	Jaspur	Gandhinagar	2024-09-20	5015226	1088733306	Run13	DNA	Monsoon 2024
D-GK25	Kudasan	Gandhinagar	2024-09-04	7219179	1567302297	Run13	DNA	Monsoon 2024
D-GK26	Kudasan	Gandhinagar	2024-09-20	6349361	1377680456	Run13	DNA	Monsoon 2024
D-GR25	Raysan	Gandhinagar	2024-09-04	12048505	2617518862	Run13	DNA	Monsoon 2024
D-GR26	Raysan	Gandhinagar	2024-09-20	7001155	1520301250	Run13	DNA	Monsoon 2024
D-GS25	Sargasan	Gandhinagar	2024-09-04	13995529	3041489678	Run13	DNA	Monsoon 2024
D-GS26	Sargasan	Gandhinagar	2024-09-20	5473822	1188186524	Run13	DNA	Monsoon 2024
D-GV25	Vavol	Gandhinagar	2024-09-04	9071786	1970909094	Run13	DNA	Monsoon 2024
D-GV26	Vavol	Gandhinagar	2024-09-20	3462223	751804471	Run13	DNA	Monsoon 2024
D-RD25	Raiyadhar	Rajkot	2024-09-10	15227241	3306604318	Run13	DNA	Monsoon 2024
D-RD26	Raiyadhar	Rajkot	2024-09-24	9299678	2018062570	Run13	DNA	Monsoon 2024
D-RN25	Kothariya Near NH	Rajkot	2024-09-10	7848961	1704991350	Run13	DNA	Monsoon 2024
D-RN26	Kothariya Near NH	Rajkot	2024-09-24	8526187	1850669161	Run13	DNA	Monsoon 2024
D-RO25	Kothariya old	Rajkot	2024-09-10	5152198	1119078216	Run13	DNA	Monsoon 2024
D-RO26	Kothariya old	Rajkot	2024-09-24	8164104	1771209901	Run13	DNA	Monsoon 2024
D-RP25	Popatpara	Rajkot	2024-09-10	12544159	2724171135	Run13	DNA	Monsoon 2024
D-RP26	Popatpara	Rajkot	2024-09-24	11390642	2471578162	Run13	DNA	Monsoon 2024
D-RR25	Raiya	Rajkot	2024-09-10	12474711	2708560626	Run13	DNA	Monsoon 2024
D-RR26	Raiya	Rajkot	2024-09-24	10494738	2275709174	Run13	DNA	Monsoon 2024
D-VA26	Atladara	Vadodara	2024-09-16	9701263	2106224963	Run13	DNA	Monsoon 2024
D-VC26	Channi	Vadodara	2024-09-16	7962929	1714857415	Run13	DNA	Monsoon 2024
D-VG25	Gajarwadi	Vadodara	2024-09-03	12101550	2628339924	Run13	DNA	Monsoon 2024
D-VG26	Gajarwadi	Vadodara	2024-09-16	8838914	1919151511	Run13	DNA	Monsoon 2024
D-VT25	Tarsali	Vadodara	2024-09-03	13324458	2895248013	Run13	DNA	Monsoon 2024
D-VT26	Tarsali	Vadodara	2024-09-16	12839276	2781171737	Run13	DNA	Monsoon 2024
R-AA26	Ambawadi	Ahmedabad	2024-09-20	7155056	1552385354	Run13	RNA	Monsoon 2024
R-AD25	Paldi	Ahmedabad	2024-09-04	13099210	2842572013	Run13	RNA	Monsoon 2024
R-AD26	Paldi	Ahmedabad	2024-09-20	9833687	2135668896	Run13	RNA	Monsoon 2024
R-AG25	Maninagar	Ahmedabad	2024-09-04	14343358	3112951173	Run13	RNA	Monsoon 2024
R-AG26	Maninagar	Ahmedabad	2024-09-20	10354670	2247534153	Run13	RNA	Monsoon 2024
R-AJ25	Jamalpur	Ahmedabad	2024-09-04	4965363	1076494531	Run13	RNA	Monsoon 2024
R-AJ26	Jamalpur	Ahmedabad	2024-09-20	12135290	2634768334	Run13	RNA	Monsoon 2024
R-AM25	Motera	Ahmedabad	2024-09-04	5957501	1292824049	Run13	RNA	Monsoon 2024
R-AM26	Motera	Ahmedabad	2024-09-20	10782824	2341249971	Run13	RNA	Monsoon 2024
R-AN25	Vasna MLD	Ahmedabad	2024-09-04	7625352	1649838569	Run13	RNA	Monsoon 2024
R-AN26	Vasna MLD	Ahmedabad	2024-09-20	8449830	1833261805	Run13	RNA	Monsoon 2024
R-AP25	Pirana	Ahmedabad	2024-09-04	10426663	2261737216	Run13	RNA	Monsoon 2024
R-AP26	Pirana	Ahmedabad	2024-09-20	3770512	818500941	Run13	RNA	Monsoon 2024
R-AR26	Ranip	Ahmedabad	2024-09-20	3173691	687594265	Run13	RNA	Monsoon 2024
R-AS25	Vasna SPS	Ahmedabad	2024-09-04	6754877	1462234007	Run13	RNA	Monsoon 2024
R-AS26	Vasna SPS	Ahmedabad	2024-09-20	14580661	3162959950	Run13	RNA	Monsoon 2024
R-AV25	Vinzol	Ahmedabad	2024-09-04	7576091	1643827818	Run13	RNA	Monsoon 2024
R-AV26	Vinzol	Ahmedabad	2024-09-20	14647029	3177980008	Run13	RNA	Monsoon 2024
R-GJ25	Jaspur	Gandhinagar	2024-09-04	7726674	1677073289	Run13	RNA	Monsoon 2024
R-GJ26	Jaspur	Gandhinagar	2024-09-20	20237879	4389498089	Run13	RNA	Monsoon 2024
R-GK25	Kudasan	Gandhinagar	2024-09-04	6614293	1435270199	Run13	RNA	Monsoon 2024
R-GK26	Kudasan	Gandhinagar	2024-09-20	5294203	1148073527	Run13	RNA	Monsoon 2024
R-GR25	Raysan	Gandhinagar	2024-09-04	7458800	1619403525	Run13	RNA	Monsoon 2024
R-GR26	Raysan	Gandhinagar	2024-09-20	18511893	4016167339	Run13	RNA	Monsoon 2024
R-GS25	Sargasan	Gandhinagar	2024-09-04	15641488	3397291518	Run13	RNA	Monsoon 2024
R-GS26	Sargasan	Gandhinagar	2024-09-20	33392591	7242755517	Run13	RNA	Monsoon 2024
R-GV25	Vavol	Gandhinagar	2024-09-04	6659090	1445267941	Run13	RNA	Monsoon 2024
R-GV26	Vavol	Gandhinagar	2024-09-20	2990343	648659820	Run13	RNA	Monsoon 2024
R-RD25	Raiyadhar	Rajkot	2024-09-10	4980958	1081283012	Run13	RNA	Monsoon 2024
R-RD26	Raiyadhar	Rajkot	2024-09-24	6676190	1448235335	Run13	RNA	Monsoon 2024
R-RN25	Kothariya Near NH	Rajkot	2024-09-10	2638135	572650408	Run13	RNA	Monsoon 2024
R-RN26	Kothariya Near NH	Rajkot	2024-09-24	15304145	3320565805	Run13	RNA	Monsoon 2024
R-RO25	Kothariya old	Rajkot	2024-09-10	2264780	491277495	Run13	RNA	Monsoon 2024
R-RO26	Kothariya old	Rajkot	2024-09-24	4781864	1036622697	Run13	RNA	Monsoon 2024
R-RP25	Popatpara	Rajkot	2024-09-10	6557523	1423650196	Run13	RNA	Monsoon 2024
R-RP26	Popatpara	Rajkot	2024-09-24	10019518	2173493864	Run13	RNA	Monsoon 2024
R-RR25	Raiya	Rajkot	2024-09-10	4133783	897182175	Run13	RNA	Monsoon 2024
R-RR26	Raiya	Rajkot	2024-09-24	6235741	1353086032	Run13	RNA	Monsoon 2024
R-VA26	Atladara	Vadodara	2024-09-16	7018760	1520985252	Run13	RNA	Monsoon 2024
R-VC26	Channi	Vadodara	2024-09-16	12738184	2761367738	Run13	RNA	Monsoon 2024
R-VG25	Gajarwadi	Vadodara	2024-09-03	22687668	4921211971	Run13	RNA	Monsoon 2024
R-VG26	Gajarwadi	Vadodara	2024-09-16	10929276	2370181362	Run13	RNA	Monsoon 2024
R-VT25	Tarsali	Vadodara	2024-09-03	22686702	4922182578	Run13	RNA	Monsoon 2024
R-VT26	Tarsali	Vadodara	2024-09-16	10497671	2275725009	Run13	RNA	Monsoon 2024

## Sheet: S2
Table S2. Combined report generated from EsViritu workflow for all the samples.
sample_ID	accession	reference_length	covered_bases	reads_aligned	mean_coverage	Coverage %	RPKMF	sequence_name	taxid	kingdom	phylum	class	order	family	genus	species	subspecies	strain	total_filtered_reads_in_sample	Run	Nucleic_Acid	Host	Coverage Criteria
D-Ambavadi-Sept1	V01108.1	5153	5080	103218	2129.55	98.5833	2622.31	Human BK virus (strain Dunlop) genome. (Closely related to SV40.)	1891762	Viruses	Cossaviricota	Papovaviricetes	Sepolyvirales	Polyomaviridae	Betapolyomavirus	Betapolyomavirus hominis	unclassified Betapolyomavirus hominis subspecies/strain	unclassified Betapolyomavirus hominis strain	7638544	Run1	DNA	Human	Over 90%
D-Ambavadi-Sept1	J02226.1	5130	5027	62103	1291.83	97.9922	1584.84	JC virus complete genome	10632	Viruses	Cossaviricota	Papovaviricetes	Sepolyvirales	Polyomaviridae	Betapolyomavirus	Betapolyomavirus secuhominis	JC polyomavirus	JC polyomavirus	7638544	Run1	DNA	Human	Over 90%
D-Ambavadi-Sept1	KY316160.1	34169	33218	36417	110.378	97.2168	139.528	Human adenovirus 41 isolate SH/2015/D16, complete genome	10524	Viruses	Preplasmiviricota	Tectiliviricetes	Rowavirales	Adenoviridae	Mastadenovirus	Human mastadenovirus F	Human adenovirus 41	Human adenovirus 41	7638544	Run1	DNA	Human	Over 90%
D-Ambavadi-Sept1	MF118167.1	3925	1987	2203	59.5711	50.6242	73.4792	Human fecal virus Jorvi2, complete genome	2017081	Viruses	Cressdnaviricota	Arfiviricetes	Cirlivirales	Circoviridae	unclassified Circoviridae genus	Human fecal virus Jorvi2	unclassified Human fecal virus Jorvi2 subspecies/strain	unclassified Human fecal virus Jorvi2 strain	7638544	Run1	DNA	Human	50% to 90%
D-Ambavadi-Sept1	HM011556.1	5387	5286	1995	39.2055	98.1251	48.4825	Merkel cell polyomavirus isolate R17b, complete genome	493803	Viruses	Cossaviricota	Papovaviricetes	Sepolyvirales	Polyomaviridae	Alphapolyomavirus	Alphapolyomavirus quintihominis	Merkel cell polyomavirus	Merkel cell polyomavirus	7638544	Run1	DNA	Human	Over 90%
D-Ambavadi-Sept1	X70829.1	7308	6962	2476	35.6854	95.2655	44.3549	Human papillomavirus type 65 complete genome	28312	Viruses	Cossaviricota	Papovaviricetes	Zurhausenvirales	Papillomaviridae	Gammapapillomavirus	Gammapapillomavirus 1	Human papillomavirus 65	Human papillomavirus 65	7638544	Run1	DNA	Human	Over 90%
D-Ambavadi-Sept1	FJ973560.1	4958	3248	1459	29.6535	65.5103	38.5246	Human bocavirus 2b NI strain HBoV2B-NI-213, complete genome	1511881	Viruses	Cossaviricota	Quintoviricetes	Piccovirales	Parvoviridae	Bocaparvovirus	Primate bocaparvovirus 2	Human bocavirus 2b NI	Human bocavirus 2b NI	7638544	Run1	DNA	Human	50% to 90%
D-Ambavadi-Sept1	JQ326209.1	35153	25211	9592	28.5288	71.7179	35.722	Human adenovirus 19, complete genome	28278	Viruses	Preplasmiviricota	Tectiliviricetes	Rowavirales	Adenoviridae	Mastadenovirus	Human mastadenovirus D	Human adenovirus 19	Human adenovirus 19	7638544	Run1	DNA	Human	50% to 90%
D-Ambavadi-Sept1	L19443.1	34214	27011	9322	28.2293	78.9472	35.6693	Human adenovirus F, complete genome	130309	Viruses	Preplasmiviricota	Tectiliviricetes	Rowavirales	Adenoviridae	Mastadenovirus	Human mastadenovirus F	unclassified Human mastadenovirus F subspecies/strain	unclassified Human mastadenovirus F strain	7638544	Run1	DNA	Human	50% to 90%
D-Ambavadi-Sept1	MF588733.1	7282	6463	1630	23.857	88.7531	29.304	Gammapapillomavirus 19 isolate Gamma19_w18c11d, complete genome	1513264	Viruses	Cossaviricota	Papovaviricetes	Zurhausenvirales	Papillomaviridae	Gammapapillomavirus	Gammapapillomavirus 19	unclassified Gammapapillomavirus 19 subspecies/strain	unclassified Gammapapillomavirus 19 strain	7638544	Run1	DNA	Human	50% to 90%
D-Ambavadi-Sept1	AF043303.1	4679	3530	815	18.8492	75.4435	22.8031	Adeno-associated virus 2, complete genome	10804	Viruses	Cossaviricota	Quintoviricetes	Piccovirales	Parvoviridae	Dependoparvovirus	Adeno-associated dependoparvovirus A	adeno-associated virus 2	adeno-associated virus 2	7638544	Run1	DNA	Human	50% to 90%
D-Ambavadi-Sept1	AB448776.1	35215	22413	5584	16.5293	63.6462	20.759	Human adenovirus 37 genomic DNA, complete genome, isolate: 1991	52275	Viruses	Preplasmiviricota	Tectiliviricetes	Rowavirales	Adenoviridae	Mastadenovirus	Human mastadenovirus D	Human adenovirus D37	Human adenovirus D37	7638544	Run1	DNA	Human	50% to 90%
D-Ambavadi-Sept1	AF108105.1	35100	20786	5191	15.4549	59.2194	19.3612	Human adenovirus type 17 complete genome	46922	Viruses	Preplasmiviricota	Tectiliviricetes	Rowavirales	Adenoviridae	Mastadenovirus	Human mastadenovirus D	Human adenovirus 17	Human adenovirus 17	7638544	Run1	DNA	Human	50% to 90%
D-Ambavadi-Sept1	KR816167.1	7226	5601	1028	14.9668	77.5118	18.6245	Human papillomavirus type 176 isolate PLC295, complete genome	1851122	Viruses	Cossaviricota	Papovaviricetes	Zurhausenvirales	Papillomaviridae	Gammapapillomavirus	Gammapapillomavirus 8	Human papillomavirus type 176	Human papillomavirus type 176	7638544	Run1	DNA	Human	50% to 90%
D-Ambavadi-Sept1	NC_001356.1	7815	5753	770	10.3571	73.6148	12.8989	Human papillomavirus - 1, complete genome	334203	Viruses	Cossaviricota	Papovaviricetes	Zurhausenvirales	Papillomaviridae	Mupapillomavirus	Mupapillomavirus 1	unclassified Mupapillomavirus 1 subspecies/strain	unclassified Mupapillomavirus 1 strain	7638544	Run1	DNA	Human	50% to 90%
D-Ambavadi-Sept1	GQ845444.1	7397	5452	711	10.3205	73.7056	12.5836	Human papillomavirus type 122, complete genome	765054	Viruses	Cossaviricota	Papovaviricetes	Zurhausenvirales	Papillomaviridae	Betapapillomavirus	Betapapillomavirus 2	Human papillomavirus 122	Human papillomavirus 122	7638544	Run1	DNA	Human	50% to 90%
D-Ambavadi-Sept1	NC_045512.2	29903	18198	2562	8.82439	60.8568	11.2164	Severe acute respiratory syndrome coronavirus 2 isolate Wuhan-Hu-1, complete genome	2697049	Viruses	Pisuviricota	Pisoniviricetes	Nidovirales	Coronaviridae	Betacoronavirus	Severe acute respiratory syndrome-related coronavirus	Severe acute respiratory syndrome coronavirus 2	Severe acute respiratory syndrome coronavirus 2	7638544	Run1	RNA	Human	50% to 90%
D-Ambavadi-Sept1	EU233812.1	4139	1921	294	7.84934	46.4122	9.29911	Anopheles gambiae densonucleosis virus, complete genome	487311	Viruses	Cossaviricota	Quintoviricetes	Piccovirales	Parvoviridae	Brevihamaparvovirus	Dipteran brevihamaparvovirus 1	Anopheles gambiae densovirus	Anopheles gambiae densovirus	7638544	Run1	DNA	Insect	10% to 50%
D-Ambavadi-Sept1	X70828.1	7348	3836	484	6.98138	52.2047	8.62314	Human papillomavirus type 63 complete genome	28311	Viruses	Cossaviricota	Papovaviricetes	Zurhausenvirales	Papillomaviridae	Mupapillomavirus	Mupapillomavirus 2	Human papillomavirus type 63	Human papillomavirus type 63	7638544	Run1	DNA	Human	50% to 90%
D-Ambavadi-Sept1	X01457.1	5176	1443	306	6.39196	27.8787	7.73957	Parvovirus h-1, complete genome	10799	Viruses	Cossaviricota	Quintoviricetes	Piccovirales	Parvoviridae	Protoparvovirus	Rodent protoparvovirus 1	H-1 parvovirus	H-1 parvovirus	7638544	Run1	DNA	Human	10% to 50%
D-Ambavadi-Sept1	NC_012564.1	5242	1829	278	4.89533	34.8913	6.94284	Human bocavirus 3, complete genome	638313	Viruses	Cossaviricota	Quintoviricetes	Piccovirales	Parvoviridae	Bocaparvovirus	Primate bocaparvovirus 1	Human bocavirus 3	Human bocavirus 3	7638544	Run1	DNA	Human	10% to 50%
D-Ambavadi-Sept1	U31782.1	7452	3160	299	4.28157	42.4047	5.25276	Human papillomavirus type 24, complete genome	37956	Viruses	Cossaviricota	Papovaviricetes	Zurhausenvirales	Papillomaviridae	Betapapillomavirus	Betapapillomavirus 1	human papillomavirus 24	human papillomavirus 24	7638544	Run1	DNA	Human	10% to 50%
D-Ambavadi-Sept1	U31781.1	7324	3266	290	4.2063	44.5931	5.18369	Human papillomavirus type 23, complete genome	37955	Viruses	Cossaviricota	Papovaviricetes	Zurhausenvirales	Papillomaviridae	Betapapillomavirus	Betapapillomavirus 2	Human papillomavirus 23	Human papillomavirus 23	7638544	Run1	DNA	Human	10% to 50%
D-Ambavadi-Sept1	HF930491.1	7359	2458	257	3.71147	33.4013	4.57197	Human papillomavirus type 174 complete genome, isolate V001	1347832	Viruses	Cossaviricota	Papovaviricetes	Zurhausenvirales	Papillomaviridae	Betapapillomavirus	Betapapillomavirus 2	Human papillomavirus 174	Human papillomavirus 174	7638544	Run1	DNA	Human	10% to 50%
D-Ambavadi-Sept1	AB746853.1	34978	7202	1090	3.18795	20.5901	4.07963	Human adenovirus 8 DNA, complete genome, strain: Trim variant	31545	Viruses	Preplasmiviricota	Tectiliviricetes	Rowavirales	Adenoviridae	Mastadenovirus	Human mastadenovirus D	Human adenovirus D8	Human adenovirus D8	7638544	Run1	DNA	Human	10% to 50%
D-Ambavadi-Sept1	Y15176.1	7427	2181	187	2.66868	29.3658	3.29623	Human papillomavirus type 80 E6, E7, E1, E2, E4, L2, and L1 genes	69987	Viruses	Cossaviricota	Papovaviricetes	Zurhausenvirales	Papillomaviridae	Betapapillomavirus	Betapapillomavirus 2	Human papillomavirus 80	Human papillomavirus 80	7638544	Run1	DNA	Human	10% to 50%
D-Ambavadi-Sept1	HM011560.1	4926	1399	121	2.61474	28.4003	3.21574	Polyomavirus HPyV6 isolate 607a, complete genome	746830	Viruses	Cossaviricota	Papovaviricetes	Sepolyvirales	Polyomaviridae	Deltapolyomavirus	Deltapolyomavirus sextihominis	Human polyomavirus 6	Human polyomavirus 6	7638544	Run1	DNA	Human	10% to 50%
D-Ambavadi-Sept1	Y15173.1	7537	2082	174	2.49844	27.6237	3.02232	Human papillomavirus type 75 E6, E7, E1, E2, E4, L2, and L1 genes	69984	Viruses	Cossaviricota	Papovaviricetes	Zurhausenvirales	Papillomaviridae	Betapapillomavirus	Betapapillomavirus 3	human papillomavirus 75	human papillomavirus 75	7638544	Run1	DNA	Human	10% to 50%
D-Ambavadi-Sept1	X74468.1	7412	1792	158	2.1786	24.177	2.79069	Human papillomavirus type 15 genomic DNA	10606	Viruses	Cossaviricota	Papovaviricetes	Zurhausenvirales	Papillomaviridae	Betapapillomavirus	Betapapillomavirus 2	Human papillomavirus 15	Human papillomavirus 15	7638544	Run1	DNA	Human	10% to 50%
D-Ambavadi-Sept1	U31790.1	7184	2086	150	2.24438	29.0367	2.73347	Human papillomavirus type 50, complete genome	40539	Viruses	Cossaviricota	Papovaviricetes	Zurhausenvirales	Papillomaviridae	Gammapapillomavirus	Gammapapillomavirus 3	Human papillomavirus type 50	Human papillomavirus type 50	7638544	Run1	DNA	Human	10% to 50%
D-Ambavadi-Sept1	X70827.1	7353	2514	152	2.16021	34.1901	2.70625	Human papillomavirus type 4 complete genome	10617	Viruses	Cossaviricota	Papovaviricetes	Zurhausenvirales	Papillomaviridae	Gammapapillomavirus	Gammapapillomavirus 1	Human papillomavirus 4	Human papillomavirus 4	7638544	Run1	DNA	Human	10% to 50%
D-Ambavadi-Sept1	MF588724.1	7272	1932	139	2.02668	26.5677	2.50236	Gammapapillomavirus 15 isolate Gamma15_EV03c104, complete genome	1513260	Viruses	Cossaviricota	Papovaviricetes	Zurhausenvirales	Papillomaviridae	Gammapapillomavirus	Gammapapillomavirus 15	unclassified Gammapapillomavirus 15 subspecies/strain	unclassified Gammapapillomavirus 15 strain	7638544	Run1	DNA	Human	10% to 50%
D-Ambavadi-Sept1	EU410348.1	7423	1536	141	2.02709	20.6924	2.48673	Human papillomavirus type 110, complete genome	518629	Viruses	Cossaviricota	Papovaviricetes	Zurhausenvirales	Papillomaviridae	Betapapillomavirus	Betapapillomavirus 2	Human papillomavirus 110	Human papillomavirus 110	7638544	Run1	DNA	Human	10% to 50%
D-Ambavadi-Sept1	Y15174.1	7549	1722	139	1.95999	22.811	2.41054	Human papillomavirus type 76 E6, E7, E1, E2, E4, L2, and L1 genes	69985	Viruses	Cossaviricota	Papovaviricetes	Zurhausenvirales	Papillomaviridae	Betapapillomavirus	Betapapillomavirus 3	human papillomavirus 76	human papillomavirus 76	7638544	Run1	DNA	Human	10% to 50%
D-Ambavadi-Sept1	MF588723.1	7159	1626	123	1.8559	22.7127	2.24927	Gammapapillomavirus 14 isolate Gamma14_EV07c382, complete genome	1513259	Viruses	Cossaviricota	Papovaviricetes	Zurhausenvirales	Papillomaviridae	Gammapapillomavirus	Gammapapillomavirus 14	unclassified Gammapapillomavirus 14 subspecies/strain	unclassified Gammapapillomavirus 14 strain	7638544	Run1	DNA	Human	10% to 50%
D-Ambavadi-Sept1	X74464.1	7434	1675	127	1.85599	22.5316	2.23651	Human papillomavirus type 9 genomic DNA	10621	Viruses	Cossaviricota	Papovaviricetes	Zurhausenvirales	Papillomaviridae	Betapapillomavirus	Betapapillomavirus 2	Human papillomavirus 9	Human papillomavirus 9	7638544	Run1	DNA	Human	10% to 50%
D-Ambavadi-Sept1	MF588719.1	7110	1562	120	1.50014	21.9691	2.20954	Gammapapillomavirus 12 isolate Gamma12_w23c77, complete genome	1513257	Viruses	Cossaviricota	Papovaviricetes	Zurhausenvirales	Papillomaviridae	Gammapapillomavirus	Gammapapillomavirus 12	unclassified Gammapapillomavirus 12 subspecies/strain	unclassified Gammapapillomavirus 12 strain	7638544	Run1	DNA	Human	10% to 50%
D-Ambavadi-Sept1	GU117630.1	7388	1325	117	1.70765	17.9345	2.07323	Human papillomavirus type 130, complete genome	909329	Viruses	Cossaviricota	Papovaviricetes	Zurhausenvirales	Papillomaviridae	Gammapapillomavirus	Gammapapillomavirus 10	Human papillomavirus 130	Human papillomavirus 130	7638544	Run1	DNA	Human	10% to 50%
D-Ambavadi-Sept1	FJ947080.1	7476	1872	118	1.61985	25.0401	2.06634	Human papillomavirus type 115 isolate GC02, complete genome	696746	Viruses	Cossaviricota	Papovaviricetes	Zurhausenvirales	Papillomaviridae	Betapapillomavirus	Betapapillomavirus 3	human papillomavirus 115	human papillomavirus 115	7638544	Run1	DNA	Human	10% to 50%
D-Ambavadi-Sept1	MF588738.1	7309	1399	112	1.59519	19.1408	2.00609	Gammapapillomavirus 22 isolate Gamma22_TVMBSHc13, complete genome	1961679	Viruses	Cossaviricota	Papovaviricetes	Zurhausenvirales	Papillomaviridae	Gammapapillomavirus	Gammapapillomavirus 22	unclassified Gammapapillomavirus 22 subspecies/strain	unclassified Gammapapillomavirus 22 strain	7638544	Run1	DNA	Human	10% to 50%
D-Ambavadi-Sept1	MF588737.1	7285	1105	110	1.6035	15.1682	1.97675	Gammapapillomavirus 22 isolate Gamma22_m090c145, complete genome	1961679	Viruses	Cossaviricota	Papovaviricetes	Zurhausenvirales	Papillomaviridae	Gammapapillomavirus	Gammapapillomavirus 22	unclassified Gammapapillomavirus 22 subspecies/strain	unclassified Gammapapillomavirus 22 strain	7638544	Run1	DNA	Human	10% to 50%
D-Ambavadi-Sept1	FM955842.1	7412	1576	103	1.49546	21.2628	1.81925	Human papillomavirus type 113, complete genome	587351	Viruses	Cossaviricota	Papovaviricetes	Zurhausenvirales	Papillomaviridae	Betapapillomavirus	Betapapillomavirus 2	Human papillomavirus 113	Human papillomavirus 113	7638544	Run1	DNA	Human	10% to 50%
D-Ambavadi-Sept1	MF588725.1	7262	1124	98	1.41704	15.4778	1.76669	Gammapapillomavirus 15 isolate Gamma15_w18c134, complete genome	1513260	Viruses	Cossaviricota	Papovaviricetes	Zurhausenvirales	Papillomaviridae	Gammapapillomavirus	Gammapapillomavirus 15	unclassified Gammapapillomavirus 15 subspecies/strain	unclassified Gammapapillomavirus 15 strain	7638544	Run1	DNA	Human	10% to 50%
D-Ambavadi-Sept1	MF588729.1	7339	1732	99	1.44067	23.5999	1.76599	Gammapapillomavirus 18 isolate Gamma18_EV03c188, complete genome	1513263	Viruses	Cossaviricota	Papovaviricetes	Zurhausenvirales	Papillomaviridae	Gammapapillomavirus	Gammapapillomavirus 18	unclassified Gammapapillomavirus 18 subspecies/strain	unclassified Gammapapillomavirus 18 strain	7638544	Run1	DNA	Human	10% to 50%
D-Ambavadi-Sept1	FN677755.1	7436	1333	100	1.35465	17.9263	1.76056	Human papillomavirus type 150, complete genome, isolate SIBX1	743811	Viruses	Cossaviricota	Papovaviricetes	Zurhausenvirales	Papillomaviridae	Betapapillomavirus	Betapapillomavirus 5	human papillomavirus 150	human papillomavirus 150	7638544	Run1	DNA	Human	10% to 50%
D-Ambavadi-Sept1	HM999987.1	7293	1192	95	1.37687	16.3444	1.70532	Human papillomavirus type 135 isolate NJ3500, complete genome	1070408	Viruses	Cossaviricota	Papovaviricetes	Zurhausenvirales	Papillomaviridae	Gammapapillomavirus	Gammapapillomavirus 15	Human papillomavirus 135	Human papillomavirus 135	7638544	Run1	DNA	Human	10% to 50%
D-Ambavadi-Sept1	GU989205.1	5232	1258	68	1.36738	24.0443	1.70149	Trichodysplasia spinulosa-associated polyomavirus, complete genome	862909	Viruses	Cossaviricota	Papovaviricetes	Sepolyvirales	Polyomaviridae	Alphapolyomavirus	Alphapolyomavirus octihominis	Trichodysplasia spinulosa-associated polyomavirus	Trichodysplasia spinulosa-associated polyomavirus	7638544	Run1	DNA	Human	10% to 50%
D-Ambavadi-Sept1	FM955837.2	7466	1497	93	1.2936	20.0509	1.63074	Human papillomavirus type 98, complete genome	587347	Viruses	Cossaviricota	Papovaviricetes	Zurhausenvirales	Papillomaviridae	Betapapillomavirus	Betapapillomavirus 1	Human papillomavirus 98	Human papillomavirus 98	7638544	Run1	DNA	Human	10% to 50%
D-Ambavadi-Sept1	U31786.1	7421	1147	86	1.22542	15.4561	1.51714	Human papillomavirus type 37, complete genome	37958	Viruses	Cossaviricota	Papovaviricetes	Zurhausenvirales	Papillomaviridae	Betapapillomavirus	Betapapillomavirus 2	Human papillomavirus 37	Human papillomavirus 37	7638544	Run1	DNA	Human	10% to 50%
D-Ambavadi-Sept1	HM999997.1	7375	1125	77	1.11654	15.2542	1.36684	Human papillomavirus type 145 isolate CL4112, complete genome	1070418	Viruses	Cossaviricota	Papovaviricetes	Zurhausenvirales	Papillomaviridae	Betapapillomavirus	Betapapillomavirus 2	Human papillomavirus 145	Human papillomavirus 145	7638544	Run1	DNA	Human	10% to 50%
D-Ambavadi-Sept1	HM999999.1	7224	1156	75	1.10277	16.0022	1.35917	Human papillomavirus type 147 isolate GH659, complete genome	1070420	Viruses	Cossaviricota	Papovaviricetes	Zurhausenvirales	Papillomaviridae	Gammapapillomavirus	Gammapapillomavirus 8	human papillomavirus 147	human papillomavirus 147	7638544	Run1	DNA	Human	10% to 50%
D-Ambavadi-Sept1	MF588756.1	7230	1024	65	0.947316	14.1632	1.17697	Gammapapillomavirus sp. isolate GammaiDysk6_wg1c05, complete genome	2049444	Viruses	Cossaviricota	Papovaviricetes	Zurhausenvirales	Papillomaviridae	Gammapapillomavirus	Gammapapillomavirus sp.	unclassified Gammapapillomavirus sp. subspecies/strain	unclassified Gammapapillomavirus sp. strain	7638544	Run1	DNA	Human	10% to 50%
D-Ambavadi-Sept1	AF083975.2	45063	6062	358	0.832098	13.4523	1.04005	Fowl adenovirus 9, complete genome	172864	Viruses	Preplasmiviricota	Tectiliviricetes	Rowavirales	Adenoviridae	Aviadenovirus	Fowl aviadenovirus D	Fowl adenovirus 9	Fowl adenovirus 9	7638544	Run1	DNA	Animal	10% to 50%
D-Ambavadi-Sept1	X74480.1	7560	1258	53	0.743455	16.6402	0.91779	Human papillomavirus type 49 genomic DNA	10616	Viruses	Cossaviricota	Papovaviricetes	Zurhausenvirales	Papillomaviridae	Betapapillomavirus	Betapapillomavirus 3	Human papillomavirus type 49	Human papillomavirus type 49	7638544	Run1	DNA	Human	10% to 50%
D-Ambavadi-Sept1	JX429973.1	7329	1059	50	0.747458	14.4494	0.89313	Human papillomavirus type 156 isolate GC01, complete genome	1248396	Viruses	Cossaviricota	Papovaviricetes	Zurhausenvirales	Papillomaviridae	Gammapapillomavirus	Gammapapillomavirus 18	Human papillomavirus type 156	Human papillomavirus type 156	7638544	Run1	DNA	Human	10% to 50%
D-Ambavadi-Sept1	KT862807.1	43337	3618	269	0.657235	8.34852	0.812611	Fowl aviadenovirus 3 strain SR49, complete genome	172860	Viruses	Preplasmiviricota	Tectiliviricetes	Rowavirales	Adenoviridae	Aviadenovirus	Fowl aviadenovirus D	Fowl aviadenovirus 3	Fowl aviadenovirus 3	7638544	Run1	DNA	Animal	LESS
D-Ambavadi-Sept1	AM749299.1	33763	1178	137	0.432095	3.48903	0.531213	Human adenovirus type 31 complete genome, serotype 31	10529	Viruses	Preplasmiviricota	Tectiliviricetes	Rowavirales	Adenoviridae	Mastadenovirus	Human mastadenovirus A	Human adenovirus 31	Human adenovirus 31	7638544	Run1	DNA	Human	LESS
D-Ambavadi-Sept2	V01108.1	5153	5145	460885	9436.73	99.8448	6120.16	Human BK virus (strain Dunlop) genome. (Closely related to SV40.)	1891762	Viruses	Cossaviricota	Papovaviricetes	Sepolyvirales	Polyomaviridae	Betapolyomavirus	Betapolyomavirus hominis	unclassified Betapolyomavirus hominis subspecies/strain	unclassified Betapolyomavirus hominis strain	14614028	Run1	DNA	Human	Over 90%
D-Ambavadi-Sept2	J02226.1	5130	5092	305127	6316.53	99.2593	4069.99	JC virus complete genome	10632	Viruses	Cossaviricota	Papovaviricetes	Sepolyvirales	Polyomaviridae	Betapolyomavirus	Betapolyomavirus secuhominis	JC polyomavirus	JC polyomavirus	14614028	Run1	DNA	Human	Over 90%
D-Ambavadi-Sept2	L19443.1	34214	34204	447969	1354.51	99.9708	895.93	Human adenovirus F, complete genome	130309	Viruses	Preplasmiviricota	Tectiliviricetes	Rowavirales	Adenoviridae	Mastadenovirus	Human mastadenovirus F	unclassified Human mastadenovirus F subspecies/strain	unclassified Human mastadenovirus F strain	14614028	Run1	DNA	Human	Over 90%
D-Ambavadi-Sept2	KY316160.1	34169	34054	187085	560.161	99.6634	374.66	Human adenovirus 41 isolate SH/2015/D16, complete genome	10524	Viruses	Preplasmiviricota	Tectiliviricetes	Rowavirales	Adenoviridae	Mastadenovirus	Human mastadenovirus F	Human adenovirus 41	Human adenovirus 41	14614028	Run1	DNA	Human	Over 90%
D-Ambavadi-Sept2	BK000400.1	33034	29099	58068	184.614	88.088	120.283	TPA: Bovine adenovirus 2, complete genome	NA	Viruses	Preplasmiviricota	Tectiliviricetes	Rowavirales	Adenoviridae	Mastadenovirus	Mastadenovirus bovidae	Bovine adenovirus	Bovine adenovirus 2	14614028	Run1	DNA	Animal	50% to 90%
D-Ambavadi-Sept2	NC_001356.1	7815	7789	10738	144.01	99.6673	94.0209	Human papillomavirus - 1, complete genome	334203	Viruses	Cossaviricota	Papovaviricetes	Zurhausenvirales	Papillomaviridae	Mupapillomavirus	Mupapillomavirus 1	unclassified Mupapillomavirus 1 subspecies/strain	unclassified Mupapillomavirus 1 strain	14614028	Run1	DNA	Human	Over 90%
D-Ambavadi-Sept2	AF043303.1	4679	4424	5161	118.628	94.5501	75.4763	Adeno-associated virus 2, complete genome	10804	Viruses	Cossaviricota	Quintoviricetes	Piccovirales	Parvoviridae	Dependoparvovirus	Adeno-associated dependoparvovirus A	adeno-associated virus 2	adeno-associated virus 2	14614028	Run1	DNA	Human	Over 90%
D-Ambavadi-Sept2	JQ326209.1	35153	31776	38403	112.948	90.3934	74.7537	Human adenovirus 19, complete genome	28278	Viruses	Preplasmiviricota	Tectiliviricetes	Rowavirales	Adenoviridae	Mastadenovirus	Human mastadenovirus D	Human adenovirus 19	Human adenovirus 19	14614028	Run1	DNA	Human	Over 90%
D-Ambavadi-Sept2	MF118167.1	3925	2046	3423	90.7075	52.1274	59.6757	Human fecal virus Jorvi2, complete genome	2017081	Viruses	Cressdnaviricota	Arfiviricetes	Cirlivirales	Circoviridae	unclassified Circoviridae genus	Human fecal virus Jorvi2	unclassified Human fecal virus Jorvi2 subspecies/strain	unclassified Human fecal virus Jorvi2 strain	14614028	Run1	DNA	Human	50% to 90%
D-Ambavadi-Sept2	HM011556.1	5387	5387	4346	84.764	100	55.2043	Merkel cell polyomavirus isolate R17b, complete genome	493803	Viruses	Cossaviricota	Papovaviricetes	Sepolyvirales	Polyomaviridae	Alphapolyomavirus	Alphapolyomavirus quintihominis	Merkel cell polyomavirus	Merkel cell polyomavirus	14614028	Run1	DNA	Human	Over 90%
D-Ambavadi-Sept2	AB448776.1	35215	30028	24414	72.029	85.2705	47.4396	Human adenovirus 37 genomic DNA, complete genome, isolate: 1991	52275	Viruses	Preplasmiviricota	Tectiliviricetes	Rowavirales	Adenoviridae	Mastadenovirus	Human mastadenovirus D	Human adenovirus D37	Human adenovirus D37	14614028	Run1	DNA	Human	50% to 90%
D-Ambavadi-Sept2	AF108105.1	35100	28781	24206	71.752	81.9972	47.1896	Human adenovirus type 17 complete genome	46922	Viruses	Preplasmiviricota	Tectiliviricetes	Rowavirales	Adenoviridae	Mastadenovirus	Human mastadenovirus D	Human adenovirus 17	Human adenovirus 17	14614028	Run1	DNA	Human	50% to 90%
D-Ambavadi-Sept2	X70828.1	7348	7347	3222	46.3759	99.9864	30.0045	Human papillomavirus type 63 complete genome	28311	Viruses	Cossaviricota	Papovaviricetes	Zurhausenvirales	Papillomaviridae	Mupapillomavirus	Mupapillomavirus 2	Human papillomavirus type 63	Human papillomavirus type 63	14614028	Run1	DNA	Human	Over 90%
D-Ambavadi-Sept2	AM749299.1	33763	32190	11152	34.141	95.3411	22.6017	Human adenovirus type 31 complete genome, serotype 31	10529	Viruses	Preplasmiviricota	Tectiliviricetes	Rowavirales	Adenoviridae	Mastadenovirus	Human mastadenovirus A	Human adenovirus 31	Human adenovirus 31	14614028	Run1	DNA	Human	Over 90%
D-Ambavadi-Sept2	NC_012042.1	5196	2934	1245	23.8266	56.4665	16.3957	Human bocavirus 2c PK isolate PK-5510, complete genome	1511882	Viruses	Cossaviricota	Quintoviricetes	Piccovirales	Parvoviridae	Bocaparvovirus	Primate bocaparvovirus 2	Human bocavirus 2c PK	Human bocavirus 2c PK	14614028	Run1	DNA	Human	50% to 90%
D-Ambavadi-Sept2	FJ973560.1	4958	2843	1137	22.6533	57.3417	15.6922	Human bocavirus 2b NI strain HBoV2B-NI-213, complete genome	1511881	Viruses	Cossaviricota	Quintoviricetes	Piccovirales	Parvoviridae	Bocaparvovirus	Primate bocaparvovirus 2	Human bocavirus 2b NI	Human bocavirus 2b NI	14614028	Run1	DNA	Human	50% to 90%
D-Ambavadi-Sept2	AY461507.1	6034	2186	1218	21.5233	36.228	13.8125	Mythimna loreyi densovirus, complete genome	185636	Viruses	Cossaviricota	Quintoviricetes	Piccovirales	Parvoviridae	Ambidensovirus	Lepidopteran ambidensovirus 1	Mythimna loreyi densovirus	Mythimna loreyi densovirus	14614028	Run1	DNA	Insect	10% to 50%
D-Ambavadi-Sept2	GQ845444.1	7397	6200	1082	15.3302	83.8178	10.0093	Human papillomavirus type 122, complete genome	765054	Viruses	Cossaviricota	Papovaviricetes	Zurhausenvirales	Papillomaviridae	Betapapillomavirus	Betapapillomavirus 2	Human papillomavirus 122	Human papillomavirus 122	14614028	Run1	DNA	Human	50% to 90%
D-Ambavadi-Sept2	X70829.1	7308	6532	1045	14.6502	89.3815	9.78471	Human papillomavirus type 65 complete genome	28312	Viruses	Cossaviricota	Papovaviricetes	Zurhausenvirales	Papillomaviridae	Gammapapillomavirus	Gammapapillomavirus 1	Human papillomavirus 65	Human papillomavirus 65	14614028	Run1	DNA	Human	50% to 90%
D-Ambavadi-Sept2	GQ845442.1	7304	6317	975	13.7325	86.4869	9.13427	Human papillomavirus type 120, complete genome	765052	Viruses	Cossaviricota	Papovaviricetes	Zurhausenvirales	Papillomaviridae	Betapapillomavirus	Betapapillomavirus 2	Human papillomavirus 120	Human papillomavirus 120	14614028	Run1	DNA	Human	50% to 90%
D-Ambavadi-Sept2	EU233812.1	4139	2171	537	14.0065	52.4523	8.87787	Anopheles gambiae densonucleosis virus, complete genome	487311	Viruses	Cossaviricota	Quintoviricetes	Piccovirales	Parvoviridae	Brevihamaparvovirus	Dipteran brevihamaparvovirus 1	Anopheles gambiae densovirus	Anopheles gambiae densovirus	14614028	Run1	DNA	Insect	50% to 90%
D-Ambavadi-Sept2	U31790.1	7184	5863	906	13.0208	81.6119	8.62963	Human papillomavirus type 50, complete genome	40539	Viruses	Cossaviricota	Papovaviricetes	Zurhausenvirales	Papillomaviridae	Gammapapillomavirus	Gammapapillomavirus 3	Human papillomavirus type 50	Human papillomavirus type 50	14614028	Run1	DNA	Human	50% to 90%
D-Ambavadi-Sept2	U31782.1	7452	6633	918	12.8358	89.0097	8.42946	Human papillomavirus type 24, complete genome	37956	Viruses	Cossaviricota	Papovaviricetes	Zurhausenvirales	Papillomaviridae	Betapapillomavirus	Betapapillomavirus 1	human papillomavirus 24	human papillomavirus 24	14614028	Run1	DNA	Human	50% to 90%
D-Ambavadi-Sept2	U31781.1	7324	5422	894	12.7124	74.0306	8.35255	Human papillomavirus type 23, complete genome	37955	Viruses	Cossaviricota	Papovaviricetes	Zurhausenvirales	Papillomaviridae	Betapapillomavirus	Betapapillomavirus 2	Human papillomavirus 23	Human papillomavirus 23	14614028	Run1	DNA	Human	50% to 90%
D-Ambavadi-Sept2	AB746853.1	34978	14079	4089	11.8489	40.251	7.9993	Human adenovirus 8 DNA, complete genome, strain: Trim variant	31545	Viruses	Preplasmiviricota	Tectiliviricetes	Rowavirales	Adenoviridae	Mastadenovirus	Human mastadenovirus D	Human adenovirus D8	Human adenovirus D8	14614028	Run1	DNA	Human	10% to 50%
D-Ambavadi-Sept2	KX868289.2	33676	26133	3594	10.985	77.6013	7.30277	Human adenovirus 12 isolate GyK010, complete genome	28282	Viruses	Preplasmiviricota	Tectiliviricetes	Rowavirales	Adenoviridae	Mastadenovirus	Human mastadenovirus A	Human adenovirus 12	Human adenovirus 12	14614028	Run1	DNA	Human	50% to 90%
D-Ambavadi-Sept2	X01457.1	5176	1856	460	9.45086	35.8578	6.08126	Parvovirus h-1, complete genome	10799	Viruses	Cossaviricota	Quintoviricetes	Piccovirales	Parvoviridae	Protoparvovirus	Rodent protoparvovirus 1	H-1 parvovirus	H-1 parvovirus	14614028	Run1	DNA	Human	10% to 50%
D-Ambavadi-Sept2	X74468.1	7412	5424	599	8.06582	73.1786	5.52995	Human papillomavirus type 15 genomic DNA	10606	Viruses	Cossaviricota	Papovaviricetes	Zurhausenvirales	Papillomaviridae	Betapapillomavirus	Betapapillomavirus 2	Human papillomavirus 15	Human papillomavirus 15	14614028	Run1	DNA	Human	50% to 90%
D-Ambavadi-Sept2	Y15176.1	7427	5026	567	8.13962	67.672	5.22396	Human papillomavirus type 80 E6, E7, E1, E2, E4, L2, and L1 genes	69987	Viruses	Cossaviricota	Papovaviricetes	Zurhausenvirales	Papillomaviridae	Betapapillomavirus	Betapapillomavirus 2	Human papillomavirus 80	Human papillomavirus 80	14614028	Run1	DNA	Human	50% to 90%
D-Ambavadi-Sept2	JX429973.1	7329	4692	526	7.50174	64.0196	4.91101	Human papillomavirus type 156 isolate GC01, complete genome	1248396	Viruses	Cossaviricota	Papovaviricetes	Zurhausenvirales	Papillomaviridae	Gammapapillomavirus	Gammapapillomavirus 18	Human papillomavirus type 156	Human papillomavirus type 156	14614028	Run1	DNA	Human	50% to 90%
D-Ambavadi-Sept2	FM955842.1	7412	4778	511	7.27995	64.463	4.71754	Human papillomavirus type 113, complete genome	587351	Viruses	Cossaviricota	Papovaviricetes	Zurhausenvirales	Papillomaviridae	Betapapillomavirus	Betapapillomavirus 2	Human papillomavirus 113	Human papillomavirus 113	14614028	Run1	DNA	Human	50% to 90%
D-Ambavadi-Sept2	HM999999.1	7224	4788	490	7.07718	66.2791	4.64139	Human papillomavirus type 147 isolate GH659, complete genome	1070420	Viruses	Cossaviricota	Papovaviricetes	Zurhausenvirales	Papillomaviridae	Gammapapillomavirus	Gammapapillomavirus 8	human papillomavirus 147	human papillomavirus 147	14614028	Run1	DNA	Human	50% to 90%
D-Ambavadi-Sept2	MF588737.1	7285	4626	491	7.05256	63.5003	4.61192	Gammapapillomavirus 22 isolate Gamma22_m090c145, complete genome	1961679	Viruses	Cossaviricota	Papovaviricetes	Zurhausenvirales	Papillomaviridae	Gammapapillomavirus	Gammapapillomavirus 22	unclassified Gammapapillomavirus 22 subspecies/strain	unclassified Gammapapillomavirus 22 strain	14614028	Run1	DNA	Human	50% to 90%
D-Ambavadi-Sept2	KX384958.1	35250	21041	2367	6.91507	59.6908	4.59483	Human adenovirus B3 strain T382/Ft Jackson South Carolina USA/2002, complete genome	45659	Viruses	Preplasmiviricota	Tectiliviricetes	Rowavirales	Adenoviridae	Mastadenovirus	Human mastadenovirus B	Human adenovirus B3	Human adenovirus B3	14614028	Run1	DNA	Human	50% to 90%
D-Ambavadi-Sept2	MF588720.1	7142	4130	461	6.8464	57.8269	4.41683	Gammapapillomavirus 12 isolate Gamma12_w34c11a, complete genome	1513257	Viruses	Cossaviricota	Papovaviricetes	Zurhausenvirales	Papillomaviridae	Gammapapillomavirus	Gammapapillomavirus 12	unclassified Gammapapillomavirus 12 subspecies/strain	unclassified Gammapapillomavirus 12 strain	14614028	Run1	DNA	Human	50% to 90%
D-Ambavadi-Sept2	EU410348.1	7423	4142	473	6.73628	55.7995	4.36025	Human papillomavirus type 110, complete genome	518629	Viruses	Cossaviricota	Papovaviricetes	Zurhausenvirales	Papillomaviridae	Betapapillomavirus	Betapapillomavirus 2	Human papillomavirus 110	Human papillomavirus 110	14614028	Run1	DNA	Human	50% to 90%
D-Ambavadi-Sept2	MF588756.1	7230	4216	450	6.58305	58.3126	4.25897	Gammapapillomavirus sp. isolate GammaiDysk6_wg1c05, complete genome	2049444	Viruses	Cossaviricota	Papovaviricetes	Zurhausenvirales	Papillomaviridae	Gammapapillomavirus	Gammapapillomavirus sp.	unclassified Gammapapillomavirus sp. subspecies/strain	unclassified Gammapapillomavirus sp. strain	14614028	Run1	DNA	Human	50% to 90%
D-Ambavadi-Sept2	HF930491.1	7359	3165	444	6.4346	43.0086	4.12852	Human papillomavirus type 174 complete genome, isolate V001	1347832	Viruses	Cossaviricota	Papovaviricetes	Zurhausenvirales	Papillomaviridae	Betapapillomavirus	Betapapillomavirus 2	Human papillomavirus 174	Human papillomavirus 174	14614028	Run1	DNA	Human	10% to 50%
D-Ambavadi-Sept2	NC_012564.1	5242	1872	315	5.36312	35.7116	4.11191	Human bocavirus 3, complete genome	638313	Viruses	Cossaviricota	Quintoviricetes	Piccovirales	Parvoviridae	Bocaparvovirus	Primate bocaparvovirus 1	Human bocavirus 3	Human bocavirus 3	14614028	Run1	DNA	Human	10% to 50%
D-Ambavadi-Sept2	U31787.1	7400	3801	411	5.86786	51.3649	3.8005	Human papillomavirus type 38, complete genome	37959	Viruses	Cossaviricota	Papovaviricetes	Zurhausenvirales	Papillomaviridae	Betapapillomavirus	Betapapillomavirus 2	Human papillomavirus 38	Human papillomavirus 38	14614028	Run1	DNA	Human	50% to 90%
D-Ambavadi-Sept2	GU989205.1	5232	2666	288	5.7192	50.9557	3.76665	Trichodysplasia spinulosa-associated polyomavirus, complete genome	862909	Viruses	Cossaviricota	Papovaviricetes	Sepolyvirales	Polyomaviridae	Alphapolyomavirus	Alphapolyomavirus octihominis	Trichodysplasia spinulosa-associated polyomavirus	Trichodysplasia spinulosa-associated polyomavirus	14614028	Run1	DNA	Human	50% to 90%
D-Ambavadi-Sept2	EU410349.1	7384	4044	395	5.61142	54.7671	3.66046	Human papillomavirus type 111, complete genome	518630	Viruses	Cossaviricota	Papovaviricetes	Zurhausenvirales	Papillomaviridae	Betapapillomavirus	Betapapillomavirus 2	Human papillomavirus 111	Human papillomavirus 111	14614028	Run1	DNA	Human	50% to 90%
D-Ambavadi-Sept2	MH355567.1	35217	18668	1862	5.45145	53.0085	3.61791	Human adenovirus 7 strain BJ/CHN/2018, complete genome	10519	Viruses	Preplasmiviricota	Tectiliviricetes	Rowavirales	Adenoviridae	Mastadenovirus	Human mastadenovirus B	Human adenovirus 7	Human adenovirus 7	14614028	Run1	DNA	Human	50% to 90%
D-Ambavadi-Sept2	HE963025.1	7443	3426	361	5.09173	46.0298	3.31886	Human papillomavirus type 159 complete genome, isolate SIBX8	1209820	Viruses	Cossaviricota	Papovaviricetes	Zurhausenvirales	Papillomaviridae	Betapapillomavirus	Betapapillomavirus 2	Human papillomavirus 159	Human papillomavirus 159	14614028	Run1	DNA	Human	10% to 50%
D-Ambavadi-Sept2	Y15173.1	7537	3001	362	5.16813	39.8169	3.28655	Human papillomavirus type 75 E6, E7, E1, E2, E4, L2, and L1 genes	69984	Viruses	Cossaviricota	Papovaviricetes	Zurhausenvirales	Papillomaviridae	Betapapillomavirus	Betapapillomavirus 3	human papillomavirus 75	human papillomavirus 75	14614028	Run1	DNA	Human	10% to 50%
D-Ambavadi-Sept2	HM999997.1	7375	3710	352	4.92443	50.3051	3.26596	Human papillomavirus type 145 isolate CL4112, complete genome	1070418	Viruses	Cossaviricota	Papovaviricetes	Zurhausenvirales	Papillomaviridae	Betapapillomavirus	Betapapillomavirus 2	Human papillomavirus 145	Human papillomavirus 145	14614028	Run1	DNA	Human	50% to 90%
D-Ambavadi-Sept2	X74469.1	7427	3875	345	4.80981	52.1745	3.1786	Human papillomavirus type 17 genomic DNA	10607	Viruses	Cossaviricota	Papovaviricetes	Zurhausenvirales	Papillomaviridae	Betapapillomavirus	Betapapillomavirus 2	Human papillomavirus 17	Human papillomavirus 17	14614028	Run1	DNA	Human	50% to 90%
D-Ambavadi-Sept2	MF588782.1	4152	1902	190	4.7941	45.8092	3.13131	Gammapapillomavirus 22 isolate iGamma22_m090c255 E7 (E7), E1 (E1), E2 (E2), and E4 (E4) genes, complete cds	1961679	Viruses	Cossaviricota	Papovaviricetes	Zurhausenvirales	Papillomaviridae	Gammapapillomavirus	Gammapapillomavirus 22	unclassified Gammapapillomavirus 22 subspecies/strain	unclassified Gammapapillomavirus 22 strain	14614028	Run1	DNA	Human	10% to 50%
D-Ambavadi-Sept2	KR816167.1	7226	4114	325	4.75042	56.9333	3.07762	Human papillomavirus type 176 isolate PLC295, complete genome	1851122	Viruses	Cossaviricota	Papovaviricetes	Zurhausenvirales	Papillomaviridae	Gammapapillomavirus	Gammapapillomavirus 8	Human papillomavirus type 176	Human papillomavirus type 176	14614028	Run1	DNA	Human	50% to 90%
D-Ambavadi-Sept2	FM955837.2	7466	3908	317	4.50465	52.344	2.90537	Human papillomavirus type 98, complete genome	587347	Viruses	Cossaviricota	Papovaviricetes	Zurhausenvirales	Papillomaviridae	Betapapillomavirus	Betapapillomavirus 1	Human papillomavirus 98	Human papillomavirus 98	14614028	Run1	DNA	Human	50% to 90%
D-Ambavadi-Sept2	MF588734.1	7214	2752	299	4.4295	38.148	2.83612	Gammapapillomavirus 22 isolate Gamma22_do1c02, complete genome	1961679	Viruses	Cossaviricota	Papovaviricetes	Zurhausenvirales	Papillomaviridae	Gammapapillomavirus	Gammapapillomavirus 22	unclassified Gammapapillomavirus 22 subspecies/strain	unclassified Gammapapillomavirus 22 strain	14614028	Run1	DNA	Human	10% to 50%
D-Ambavadi-Sept2	HM011560.1	4926	2194	204	4.38987	44.5392	2.83378	Polyomavirus HPyV6 isolate 607a, complete genome	746830	Viruses	Cossaviricota	Papovaviricetes	Sepolyvirales	Polyomaviridae	Deltapolyomavirus	Deltapolyomavirus sextihominis	Human polyomavirus 6	Human polyomavirus 6	14614028	Run1	DNA	Human	10% to 50%
D-Ambavadi-Sept2	KR816170.1	7416	3199	291	4.17011	43.1365	2.68506	Human papillomavirus type 182 isolate ACS214, complete genome	1851125	Viruses	Cossaviricota	Papovaviricetes	Zurhausenvirales	Papillomaviridae	Betapapillomavirus	Betapapillomavirus 2	Human papillomavirus type 182	Human papillomavirus type 182	14614028	Run1	DNA	Human	10% to 50%
D-Ambavadi-Sept2	Y15174.1	7549	3514	294	3.93094	46.5492	2.66494	Human papillomavirus type 76 E6, E7, E1, E2, E4, L2, and L1 genes	69985	Viruses	Cossaviricota	Papovaviricetes	Zurhausenvirales	Papillomaviridae	Betapapillomavirus	Betapapillomavirus 3	human papillomavirus 76	human papillomavirus 76	14614028	Run1	DNA	Human	10% to 50%
D-Ambavadi-Sept2	MF588724.1	7272	2873	273	3.94973	39.5077	2.56885	Gammapapillomavirus 15 isolate Gamma15_EV03c104, complete genome	1513260	Viruses	Cossaviricota	Papovaviricetes	Zurhausenvirales	Papillomaviridae	Gammapapillomavirus	Gammapapillomavirus 15	unclassified Gammapapillomavirus 15 subspecies/strain	unclassified Gammapapillomavirus 15 strain	14614028	Run1	DNA	Human	10% to 50%
D-Ambavadi-Sept2	KP692115.1	7291	3241	255	3.61854	44.4521	2.39322	Human papillomavirus type 201 isolate HPV201, complete genome	1682340	Viruses	Cossaviricota	Papovaviricetes	Zurhausenvirales	Papillomaviridae	Gammapapillomavirus	Gammapapillomavirus 27	Human papillomavirus 201	Human papillomavirus 201	14614028	Run1	DNA	Human	10% to 50%
D-Ambavadi-Sept2	MF588775.1	6160	2256	215	3.77637	36.6234	2.38829	Gammapapillomavirus 18 isolate iGamma18_w24c02 E2 (E2), L2 (L2), and L1 (L1) genes, complete cds	1513263	Viruses	Cossaviricota	Papovaviricetes	Zurhausenvirales	Papillomaviridae	Gammapapillomavirus	Gammapapillomavirus 18	unclassified Gammapapillomavirus 18 subspecies/strain	unclassified Gammapapillomavirus 18 strain	14614028	Run1	DNA	Human	10% to 50%
D-Ambavadi-Sept2	GQ845445.1	7329	2920	255	3.65706	39.8417	2.38081	Human papillomavirus type 123, complete genome	765055	Viruses	Cossaviricota	Papovaviricetes	Zurhausenvirales	Papillomaviridae	Gammapapillomavirus	Gammapapillomavirus 7	Human papillomavirus 123	Human papillomavirus 123	14614028	Run1	DNA	Human	10% to 50%
D-Ambavadi-Sept2	MT505439.1	34777	12848	1158	3.45444	36.944	2.27849	Human adenovirus 11 strain HAdV-B2/USA_GA/8348/2019/P11H11F12, complete genome	10541	Viruses	Preplasmiviricota	Tectiliviricetes	Rowavirales	Adenoviridae	Mastadenovirus	Human mastadenovirus B	Human adenovirus 11	Human adenovirus 11	14614028	Run1	DNA	Human	10% to 50%
D-Ambavadi-Sept2	FJ947080.1	7476	3117	248	3.55856	41.6934	2.26993	Human papillomavirus type 115 isolate GC02, complete genome	696746	Viruses	Cossaviricota	Papovaviricetes	Zurhausenvirales	Papillomaviridae	Betapapillomavirus	Betapapillomavirus 3	human papillomavirus 115	human papillomavirus 115	14614028	Run1	DNA	Human	10% to 50%
D-Ambavadi-Sept2	MF588729.1	7339	2680	236	3.38615	36.5172	2.20042	Gammapapillomavirus 18 isolate Gamma18_EV03c188, complete genome	1513263	Viruses	Cossaviricota	Papovaviricetes	Zurhausenvirales	Papillomaviridae	Gammapapillomavirus	Gammapapillomavirus 18	unclassified Gammapapillomavirus 18 subspecies/strain	unclassified Gammapapillomavirus 18 strain	14614028	Run1	DNA	Human	10% to 50%
D-Ambavadi-Sept2	JF906559.1	7352	2114	229	2.66634	28.7541	2.13138	Human papillomavirus 155 isolate SE42, complete genome	1165934	Viruses	Cossaviricota	Papovaviricetes	Zurhausenvirales	Papillomaviridae	Gammapapillomavirus	Gammapapillomavirus 7	Human papillomavirus 155	Human papillomavirus 155	14614028	Run1	DNA	Human	10% to 50%
D-Ambavadi-Sept2	MF588739.1	7260	2658	218	3.10774	36.6116	2.05471	Gammapapillomavirus 22 isolate Gamma22_TVMBSWc141, complete genome	1961679	Viruses	Cossaviricota	Papovaviricetes	Zurhausenvirales	Papillomaviridae	Gammapapillomavirus	Gammapapillomavirus 22	unclassified Gammapapillomavirus 22 subspecies/strain	unclassified Gammapapillomavirus 22 strain	14614028	Run1	DNA	Human	10% to 50%
D-Ambavadi-Sept2	MF588783.1	1506	857	45	3.25147	56.9057	2.04464	Gammapapillomavirus 22 isolate iGamma22_m815c204 E2 (E2) and E4 (E4) genes, complete cds	1961679	Viruses	Cossaviricota	Papovaviricetes	Zurhausenvirales	Papillomaviridae	Gammapapillomavirus	Gammapapillomavirus 22	unclassified Gammapapillomavirus 22 subspecies/strain	unclassified Gammapapillomavirus 22 strain	14614028	Run1	DNA	Human	50% to 90%
D-Ambavadi-Sept2	MF588755.1	7282	3209	214	3.09198	44.0676	2.01091	Gammapapillomavirus sp. isolate GammaiCH2_EV03c434, complete genome	2049444	Viruses	Cossaviricota	Papovaviricetes	Zurhausenvirales	Papillomaviridae	Gammapapillomavirus	Gammapapillomavirus sp.	unclassified Gammapapillomavirus sp. subspecies/strain	unclassified Gammapapillomavirus sp. strain	14614028	Run1	DNA	Human	10% to 50%
D-Ambavadi-Sept2	X70827.1	7353	2577	208	2.95599	35.0469	1.93566	Human papillomavirus type 4 complete genome	10617	Viruses	Cossaviricota	Papovaviricetes	Zurhausenvirales	Papillomaviridae	Gammapapillomavirus	Gammapapillomavirus 1	Human papillomavirus 4	Human papillomavirus 4	14614028	Run1	DNA	Human	10% to 50%
D-Ambavadi-Sept2	KR816181.1	7260	2801	201	2.91674	38.5813	1.89448	Human papillomavirus type 194 isolate ACS290, complete genome	1851219	Viruses	Cossaviricota	Papovaviricetes	Zurhausenvirales	Papillomaviridae	Gammapapillomavirus	Human papillomavirus type 194	unclassified Human papillomavirus type 194 subspecies/strain	unclassified Human papillomavirus type 194 strain	14614028	Run1	DNA	Human	10% to 50%
D-Ambavadi-Sept2	U31786.1	7421	2814	202	2.82162	37.9194	1.8626	Human papillomavirus type 37, complete genome	37958	Viruses	Cossaviricota	Papovaviricetes	Zurhausenvirales	Papillomaviridae	Betapapillomavirus	Betapapillomavirus 2	Human papillomavirus 37	Human papillomavirus 37	14614028	Run1	DNA	Human	10% to 50%
D-Ambavadi-Sept2	FN677756.1	7386	2382	199	2.75069	32.2502	1.84363	Human papillomavirus type 151, complete genome, isolate SIBX2	743812	Viruses	Cossaviricota	Papovaviricetes	Zurhausenvirales	Papillomaviridae	Betapapillomavirus	Betapapillomavirus 2	Human papillomavirus 151	Human papillomavirus 151	14614028	Run1	DNA	Human	10% to 50%
D-Ambavadi-Sept2	MF588725.1	7262	2487	187	2.60517	34.2468	1.76204	Gammapapillomavirus 15 isolate Gamma15_w18c134, complete genome	1513260	Viruses	Cossaviricota	Papovaviricetes	Zurhausenvirales	Papillomaviridae	Gammapapillomavirus	Gammapapillomavirus 15	unclassified Gammapapillomavirus 15 subspecies/strain	unclassified Gammapapillomavirus 15 strain	14614028	Run1	DNA	Human	10% to 50%
D-Ambavadi-Sept2	KU248828.1	7262	1834	184	2.7043	25.2548	1.73377	Papillomavirus JL74, complete genome	1846251	Viruses	Cossaviricota	Papovaviricetes	Zurhausenvirales	Papillomaviridae	Gammapapillomavirus	Gammapapillomavirus 13	Papillomavirus JL74	Papillomavirus JL74	14614028	Run1	DNA	Animal	10% to 50%
D-Ambavadi-Sept2	JX413109.1	7238	2055	183	2.69597	28.3918	1.73007	Human papillomavirus type 161 isolate KC1, complete genome	1315264	Viruses	Cossaviricota	Papovaviricetes	Zurhausenvirales	Papillomaviridae	Gammapapillomavirus	Gammapapillomavirus 19	Human papillomavirus type 161	Human papillomavirus type 161	14614028	Run1	DNA	Human	10% to 50%
D-Ambavadi-Sept2	JX262162.1	4939	1422	124	2.48152	28.7913	1.71796	Human polyomavirus 10 isolate 10ww, complete genome	1208309	Viruses	Cossaviricota	Papovaviricetes	Sepolyvirales	Polyomaviridae	Deltapolyomavirus	Deltapolyomavirus decihominis	unclassified Deltapolyomavirus decihominis subspecies/strain	unclassified Deltapolyomavirus decihominis strain	14614028	Run1	DNA	Human	10% to 50%
D-Ambavadi-Sept2	HG421739.1	7228	2072	181	2.66318	28.6663	1.71353	Human papillomavirus type 179 complete genome, isolate SIBX16	1472342	Viruses	Cossaviricota	Papovaviricetes	Zurhausenvirales	Papillomaviridae	Gammapapillomavirus	Gammapapillomavirus 15	Human papillomavirus 179	Human papillomavirus 179	14614028	Run1	DNA	Human	10% to 50%
D-Ambavadi-Sept2	MF588745.1	7193	2208	180	2.59492	30.6965	1.71235	Gammapapillomavirus 23 isolate Gamma23_m090c10, complete genome	1961680	Viruses	Cossaviricota	Papovaviricetes	Zurhausenvirales	Papillomaviridae	Gammapapillomavirus	Gammapapillomavirus 23	unclassified Gammapapillomavirus 23 subspecies/strain	unclassified Gammapapillomavirus 23 strain	14614028	Run1	DNA	Human	10% to 50%
D-Ambavadi-Sept2	MF588758.1	7328	2003	183	2.42017	27.3335	1.70882	Gammapapillomavirus sp. isolate Gamma_w27c03a, complete genome	2049444	Viruses	Cossaviricota	Papovaviricetes	Zurhausenvirales	Papillomaviridae	Gammapapillomavirus	Gammapapillomavirus sp.	unclassified Gammapapillomavirus sp. subspecies/strain	unclassified Gammapapillomavirus sp. strain	14614028	Run1	DNA	Human	10% to 50%
D-Ambavadi-Sept2	AC_000008.1	35938	9624	889	2.55904	26.7795	1.69269	Human adenovirus 5, complete genome	28285	Viruses	Preplasmiviricota	Tectiliviricetes	Rowavirales	Adenoviridae	Mastadenovirus	Human mastadenovirus C	Human adenovirus 5	Human adenovirus 5	14614028	Run1	DNA	Human	10% to 50%
D-Ambavadi-Sept2	MF588699.1	7327	2062	176	2.50286	28.1425	1.64368	Gammapapillomavirus 7 isolate Gamma07_EV03c60, complete genome	1175849	Viruses	Cossaviricota	Papovaviricetes	Zurhausenvirales	Papillomaviridae	Gammapapillomavirus	Gammapapillomavirus 7	unclassified Gammapapillomavirus 7 subspecies/strain	unclassified Gammapapillomavirus 7 strain	14614028	Run1	DNA	Human	10% to 50%
D-Ambavadi-Sept2	KJ913662.1	7184	2030	172	2.50981	28.2572	1.6383	Human papillomavirus type 199 isolate KC82-SLO, complete genome	1545700	Viruses	Cossaviricota	Papovaviricetes	Zurhausenvirales	Papillomaviridae	Gammapapillomavirus	Gammapapillomavirus 12	Human papillomavirus 199	Human papillomavirus 199	14614028	Run1	DNA	Human	10% to 50%
D-Ambavadi-Sept2	MF588704.1	7227	2172	172	2.51985	30.054	1.62855	Gammapapillomavirus 8 isolate Gamma08_do1c232, complete genome	1175850	Viruses	Cossaviricota	Papovaviricetes	Zurhausenvirales	Papillomaviridae	Gammapapillomavirus	Gammapapillomavirus 8	unclassified Gammapapillomavirus 8 subspecies/strain	unclassified Gammapapillomavirus 8 strain	14614028	Run1	DNA	Human	10% to 50%
D-Ambavadi-Sept2	MF588682.1	7323	2507	173	2.52238	34.2346	1.61654	Betapapillomavirus 2 isolate Beta02_m292c14, complete genome	333924	Viruses	Cossaviricota	Papovaviricetes	Zurhausenvirales	Papillomaviridae	Betapapillomavirus	Betapapillomavirus 2	unclassified Betapapillomavirus 2 subspecies/strain	unclassified Betapapillomavirus 2 strain	14614028	Run1	DNA	Human	10% to 50%
D-Ambavadi-Sept2	MF588719.1	7110	2283	164	2.46437	32.1097	1.57835	Gammapapillomavirus 12 isolate Gamma12_w23c77, complete genome	1513257	Viruses	Cossaviricota	Papovaviricetes	Zurhausenvirales	Papillomaviridae	Gammapapillomavirus	Gammapapillomavirus 12	unclassified Gammapapillomavirus 12 subspecies/strain	unclassified Gammapapillomavirus 12 strain	14614028	Run1	DNA	Human	10% to 50%
D-Ambavadi-Sept2	JX444072.1	7129	2184	164	2.46783	30.6354	1.57415	Human papillomavirus type 165 isolate KC7, complete genome	1315266	Viruses	Cossaviricota	Papovaviricetes	Zurhausenvirales	Papillomaviridae	Gammapapillomavirus	Gammapapillomavirus 12	Human papillomavirus 165	Human papillomavirus 165	14614028	Run1	DNA	Human	10% to 50%
D-Ambavadi-Sept2	MF588689.1	7191	2528	162	2.37253	35.1551	1.54154	Gammapapillomavirus sp. isolate Gamma_w11C51, complete genome	2049444	Viruses	Cossaviricota	Papovaviricetes	Zurhausenvirales	Papillomaviridae	Gammapapillomavirus	Gammapapillomavirus sp.	unclassified Gammapapillomavirus sp. subspecies/strain	unclassified Gammapapillomavirus sp. strain	14614028	Run1	DNA	Human	10% to 50%
D-Ambavadi-Sept2	FM955839.1	7380	1532	166	2.31411	20.7588	1.53915	Human papillomavirus type 100, complete genome	587349	Viruses	Cossaviricota	Papovaviricetes	Zurhausenvirales	Papillomaviridae	Betapapillomavirus	Betapapillomavirus 2	Human papillomavirus 100	Human papillomavirus 100	14614028	Run1	DNA	Human	10% to 50%
D-Ambavadi-Sept2	HM999987.1	7293	1734	162	2.38849	23.7762	1.51998	Human papillomavirus type 135 isolate NJ3500, complete genome	1070408	Viruses	Cossaviricota	Papovaviricetes	Zurhausenvirales	Papillomaviridae	Gammapapillomavirus	Gammapapillomavirus 15	Human papillomavirus 135	Human papillomavirus 135	14614028	Run1	DNA	Human	10% to 50%
D-Ambavadi-Sept2	AC_000007.1	35937	8964	784	2.26264	24.9437	1.49281	Human adenovirus 2, complete genome	10515	Viruses	Preplasmiviricota	Tectiliviricetes	Rowavirales	Adenoviridae	Mastadenovirus	Human mastadenovirus C	Human adenovirus 2	Human adenovirus 2	14614028	Run1	DNA	Human	10% to 50%
D-Ambavadi-Sept2	MF588730.1	7292	2184	152	2.11033	29.9506	1.42635	Gammapapillomavirus 18 isolate Gamma18_EV07c385, complete genome	1513263	Viruses	Cossaviricota	Papovaviricetes	Zurhausenvirales	Papillomaviridae	Gammapapillomavirus	Gammapapillomavirus 18	unclassified Gammapapillomavirus 18 subspecies/strain	unclassified Gammapapillomavirus 18 strain	14614028	Run1	DNA	Human	10% to 50%
D-Ambavadi-Sept2	GU117634.1	7309	1865	152	2.16888	25.5165	1.42304	Human papillomavirus type 134, complete genome	909333	Viruses	Cossaviricota	Papovaviricetes	Zurhausenvirales	Papillomaviridae	Gammapapillomavirus	Gammapapillomavirus 7	Human papillomavirus 134	Human papillomavirus 134	14614028	Run1	DNA	Human	10% to 50%
D-Ambavadi-Sept2	MF588742.1	7214	1779	149	2.12174	24.6604	1.41332	Gammapapillomavirus 22 isolate Gamma22_w20c08a, complete genome	1961679	Viruses	Cossaviricota	Papovaviricetes	Zurhausenvirales	Papillomaviridae	Gammapapillomavirus	Gammapapillomavirus 22	unclassified Gammapapillomavirus 22 subspecies/strain	unclassified Gammapapillomavirus 22 strain	14614028	Run1	DNA	Human	10% to 50%
D-Ambavadi-Sept2	MF588718.1	7142	1160	142	2.06379	16.2419	1.3605	Gammapapillomavirus 12 isolate Gamma12_w11c13, complete genome	1513257	Viruses	Cossaviricota	Papovaviricetes	Zurhausenvirales	Papillomaviridae	Gammapapillomavirus	Gammapapillomavirus 12	unclassified Gammapapillomavirus 12 subspecies/strain	unclassified Gammapapillomavirus 12 strain	14614028	Run1	DNA	Human	10% to 50%
D-Ambavadi-Sept2	FN677755.1	7436	2180	147	2.10747	29.3168	1.35272	Human papillomavirus type 150, complete genome, isolate SIBX1	743811	Viruses	Cossaviricota	Papovaviricetes	Zurhausenvirales	Papillomaviridae	Betapapillomavirus	Betapapillomavirus 5	human papillomavirus 150	human papillomavirus 150	14614028	Run1	DNA	Human	10% to 50%
D-Ambavadi-Sept2	JX413106.1	7233	1958	142	2.11619	27.0704	1.34338	Human papillomavirus type 164 isolate KC4, complete genome	1315261	Viruses	Cossaviricota	Papovaviricetes	Zurhausenvirales	Papillomaviridae	Gammapapillomavirus	Gammapapillomavirus 8	human papillomavirus 164	human papillomavirus 164	14614028	Run1	DNA	Human	10% to 50%
D-Ambavadi-Sept2	MF588716.1	7127	1439	139	2.06607	20.1908	1.33456	Gammapapillomavirus 12 isolate Gamma12_EV07c367, complete genome	1513257	Viruses	Cossaviricota	Papovaviricetes	Zurhausenvirales	Papillomaviridae	Gammapapillomavirus	Gammapapillomavirus 12	unclassified Gammapapillomavirus 12 subspecies/strain	unclassified Gammapapillomavirus 12 strain	14614028	Run1	DNA	Human	10% to 50%
D-Ambavadi-Sept2	MF588693.1	7226	2088	140	2.08705	28.8957	1.32575	Gammapapillomavirus sp. isolate Gamma_w34c04a, complete genome	2049444	Viruses	Cossaviricota	Papovaviricetes	Zurhausenvirales	Papillomaviridae	Gammapapillomavirus	Gammapapillomavirus sp.	unclassified Gammapapillomavirus sp. subspecies/strain	unclassified Gammapapillomavirus sp. strain	14614028	Run1	DNA	Human	10% to 50%
D-Ambavadi-Sept2	X74464.1	7434	2224	144	2.5033	29.9166	1.32547	Human papillomavirus type 9 genomic DNA	10621	Viruses	Cossaviricota	Papovaviricetes	Zurhausenvirales	Papillomaviridae	Betapapillomavirus	Betapapillomavirus 2	Human papillomavirus 9	Human papillomavirus 9	14614028	Run1	DNA	Human	10% to 50%
D-Ambavadi-Sept2	GU117630.1	7388	1832	143	1.93479	24.797	1.32446	Human papillomavirus type 130, complete genome	909329	Viruses	Cossaviricota	Papovaviricetes	Zurhausenvirales	Papillomaviridae	Gammapapillomavirus	Gammapapillomavirus 10	Human papillomavirus 130	Human papillomavirus 130	14614028	Run1	DNA	Human	10% to 50%
D-Ambavadi-Sept2	KT698167.1	7298	1666	139	2.03987	22.8282	1.30329	Human papillomavirus 205, complete genome	2259334	Viruses	Cossaviricota	Papovaviricetes	Zurhausenvirales	Papillomaviridae	Gammapapillomavirus	Gammapapillomavirus 1	Human papillomavirus 205	Human papillomavirus 205	14614028	Run1	DNA	Human	10% to 50%
D-Ambavadi-Sept2	MF588733.1	7282	1155	138	2.03421	15.861	1.29676	Gammapapillomavirus 19 isolate Gamma19_w18c11d, complete genome	1513264	Viruses	Cossaviricota	Papovaviricetes	Zurhausenvirales	Papillomaviridae	Gammapapillomavirus	Gammapapillomavirus 19	unclassified Gammapapillomavirus 19 subspecies/strain	unclassified Gammapapillomavirus 19 strain	14614028	Run1	DNA	Human	10% to 50%
D-Ambavadi-Sept2	MF588707.1	7243	1918	136	1.96715	26.4807	1.28484	Gammapapillomavirus 8 isolate Gamma08_TVMBSHc33, complete genome	1175850	Viruses	Cossaviricota	Papovaviricetes	Zurhausenvirales	Papillomaviridae	Gammapapillomavirus	Gammapapillomavirus 8	unclassified Gammapapillomavirus 8 subspecies/strain	unclassified Gammapapillomavirus 8 strain	14614028	Run1	DNA	Human	10% to 50%
D-Ambavadi-Sept2	J02275.1	5149	1154	93	1.91098	22.4121	1.23592	Minute virus of mice, complete genome	10794	Viruses	Cossaviricota	Quintoviricetes	Piccovirales	Parvoviridae	Protoparvovirus	Rodent protoparvovirus 1	Minute virus of mice	Minute virus of mice	14614028	Run1	DNA	Animal	10% to 50%
D-Ambavadi-Sept2	MF588706.1	7262	1589	131	1.92309	21.881	1.23437	Gammapapillomavirus 8 isolate Gamma08_TVMBSGc529, complete genome	1175850	Viruses	Cossaviricota	Papovaviricetes	Zurhausenvirales	Papillomaviridae	Gammapapillomavirus	Gammapapillomavirus 8	unclassified Gammapapillomavirus 8 subspecies/strain	unclassified Gammapapillomavirus 8 strain	14614028	Run1	DNA	Human	10% to 50%
D-Ambavadi-Sept2	KR816179.1	7244	1944	127	1.87496	26.836	1.19965	Human papillomavirus 192 isolate ACS142, complete genome	1851217	Viruses	Cossaviricota	Papovaviricetes	Zurhausenvirales	Papillomaviridae	Gammapapillomavirus	Gammapapillomavirus 15	Human papillomavirus 192	Human papillomavirus 192	14614028	Run1	DNA	Human	10% to 50%
D-Ambavadi-Sept2	MF588754.1	7270	1845	127	1.78385	25.3783	1.19536	Gammapapillomavirus sp. isolate Gammai915_ga2c70, complete genome	2049444	Viruses	Cossaviricota	Papovaviricetes	Zurhausenvirales	Papillomaviridae	Gammapapillomavirus	Gammapapillomavirus sp.	unclassified Gammapapillomavirus sp. subspecies/strain	unclassified Gammapapillomavirus sp. strain	14614028	Run1	DNA	Human	10% to 50%
D-Ambavadi-Sept2	M55904.2	4754	1391	83	1.81929	29.2596	1.19467	Murine pneumotropic virus, complete genome	1891770	Viruses	Cossaviricota	Papovaviricetes	Sepolyvirales	Polyomaviridae	Betapolyomavirus	Betapolyomavirus secumuris	unclassified Betapolyomavirus secumuris subspecies/strain	unclassified Betapolyomavirus secumuris strain	14614028	Run1	DNA	Animal	10% to 50%
D-Ambavadi-Sept2	GU117629.1	7333	1441	128	1.84422	19.6509	1.19442	Human papillomavirus type 149, complete genome	909328	Viruses	Cossaviricota	Papovaviricetes	Zurhausenvirales	Papillomaviridae	Gammapapillomavirus	Gammapapillomavirus 7	Human papillomavirus 149	Human papillomavirus 149	14614028	Run1	DNA	Human	10% to 50%
D-Ambavadi-Sept2	EF467176.1	7326	1503	127	1.83333	20.516	1.18622	Human papillomavirus type 88, complete genome	337054	Viruses	Cossaviricota	Papovaviricetes	Zurhausenvirales	Papillomaviridae	Gammapapillomavirus	Gammapapillomavirus 5	Human papillomavirus type 88	Human papillomavirus type 88	14614028	Run1	DNA	Human	10% to 50%
D-Ambavadi-Sept2	MF588722.1	7243	1869	125	1.8249	25.8042	1.18092	Gammapapillomavirus 13 isolate Gamma13_HIVGc158, complete genome	1513258	Viruses	Cossaviricota	Papovaviricetes	Zurhausenvirales	Papillomaviridae	Gammapapillomavirus	Gammapapillomavirus 13	unclassified Gammapapillomavirus 13 subspecies/strain	unclassified Gammapapillomavirus 13 strain	14614028	Run1	DNA	Human	10% to 50%
D-Ambavadi-Sept2	KR816174.1	7268	1479	121	1.72914	20.3495	1.1392	Human papillomavirus 187 isolate ACS447, complete genome	1851130	Viruses	Cossaviricota	Papovaviricetes	Zurhausenvirales	Papillomaviridae	Gammapapillomavirus	Gammapapillomavirus 26	Human papillomavirus 187	Human papillomavirus 187	14614028	Run1	DNA	Human	10% to 50%
D-Ambavadi-Sept2	AY382778.1	7450	1470	117	1.65699	19.7315	1.07463	Human papillomavirus type 93, complete genome	247268	Viruses	Cossaviricota	Papovaviricetes	Zurhausenvirales	Papillomaviridae	Betapapillomavirus	Betapapillomavirus 1	Human papillomavirus 93	Human papillomavirus 93	14614028	Run1	DNA	Human	10% to 50%
D-Ambavadi-Sept2	HM999998.1	7265	1813	107	1.54758	24.9553	1.00781	Human papillomavirus type 146 isolate GH1677, complete genome	1070419	Viruses	Cossaviricota	Papovaviricetes	Zurhausenvirales	Papillomaviridae	Gammapapillomavirus	Gammapapillomavirus 15	Human papillomavirus 146	Human papillomavirus 146	14614028	Run1	DNA	Human	10% to 50%
D-Ambavadi-Sept2	U31780.1	7368	1342	106	1.48975	18.2139	0.984433	Human papillomavirus type 22, complete genome	37954	Viruses	Cossaviricota	Papovaviricetes	Zurhausenvirales	Papillomaviridae	Betapapillomavirus	Betapapillomavirus 2	Human papillomavirus 22	Human papillomavirus 22	14614028	Run1	DNA	Human	10% to 50%
D-Ambavadi-Sept2	MF588764.1	4433	1005	61	1.46346	22.6709	0.941591	Gammapapillomavirus 9 isolate iGamma09_w27c95a E2 (E2), E4 (E4), and L2 (L2) genes, complete cds	1175851	Viruses	Cossaviricota	Papovaviricetes	Zurhausenvirales	Papillomaviridae	Gammapapillomavirus	Gammapapillomavirus 9	unclassified Gammapapillomavirus 9 subspecies/strain	unclassified Gammapapillomavirus 9 strain	14614028	Run1	DNA	Human	10% to 50%
D-Ambavadi-Sept2	X74480.1	7560	1456	102	1.43576	19.2593	0.923227	Human papillomavirus type 49 genomic DNA	10616	Viruses	Cossaviricota	Papovaviricetes	Zurhausenvirales	Papillomaviridae	Betapapillomavirus	Betapapillomavirus 3	Human papillomavirus type 49	Human papillomavirus type 49	14614028	Run1	DNA	Human	10% to 50%
D-Ambavadi-Sept2	MF588726.1	7262	1712	93	1.37148	23.5748	0.876308	Gammapapillomavirus 15 isolate Gamma15_w20c10a, complete genome	1513260	Viruses	Cossaviricota	Papovaviricetes	Zurhausenvirales	Papillomaviridae	Gammapapillomavirus	Gammapapillomavirus 15	unclassified Gammapapillomavirus 15 subspecies/strain	unclassified Gammapapillomavirus 15 strain	14614028	Run1	DNA	Human	10% to 50%
D-Ambavadi-Sept2	KC862318.1	7228	1020	92	1.33781	14.1118	0.870963	Human papillomavirus type 167 isolate KC10, complete genome	1420545	Viruses	Cossaviricota	Papovaviricetes	Zurhausenvirales	Papillomaviridae	Gammapapillomavirus	Gammapapillomavirus 21	Human papillomavirus 167	Human papillomavirus 167	14614028	Run1	DNA	Human	10% to 50%
D-Ambavadi-Sept2	MH892425.1	7370	1954	92	1.2903	26.5129	0.854182	Papillomaviridae RPVne-OR02-zj isolate RPVnew-OR02-zj, complete genome	2336760	Viruses	Cossaviricota	Papovaviricetes	Zurhausenvirales	Papillomaviridae	unclassified Papillomaviridae genus	Papillomaviridae RPVne-OR02-zj	unclassified Papillomaviridae RPVne-OR02-zj subspecies/strain	unclassified Papillomaviridae RPVne-OR02-zj strain	14614028	Run1	DNA	Animal	10% to 50%
D-Ambavadi-Sept2	MF588731.1	7236	1202	88	1.28069	16.6114	0.832174	Gammapapillomavirus 18 isolate Gamma18_w34c34a, complete genome	1513263	Viruses	Cossaviricota	Papovaviricetes	Zurhausenvirales	Papillomaviridae	Gammapapillomavirus	Gammapapillomavirus 18	unclassified Gammapapillomavirus 18 subspecies/strain	unclassified Gammapapillomavirus 18 strain	14614028	Run1	DNA	Human	10% to 50%
D-Ambavadi-Sept2	MF588723.1	7159	1367	85	1.28549	19.0948	0.81245	Gammapapillomavirus 14 isolate Gamma14_EV07c382, complete genome	1513259	Viruses	Cossaviricota	Papovaviricetes	Zurhausenvirales	Papillomaviridae	Gammapapillomavirus	Gammapapillomavirus 14	unclassified Gammapapillomavirus 14 subspecies/strain	unclassified Gammapapillomavirus 14 strain	14614028	Run1	DNA	Human	10% to 50%
D-Ambavadi-Sept2	KF006400.1	7297	1174	86	1.25367	16.0888	0.806462	Human papillomavirus type 173, complete genome	1434988	Viruses	Cossaviricota	Papovaviricetes	Zurhausenvirales	Papillomaviridae	Gammapapillomavirus	Gammapapillomavirus 1	Human papillomavirus 173	Human papillomavirus 173	14614028	Run1	DNA	Human	10% to 50%
D-Ambavadi-Sept2	KT698166.1	7154	1318	84	1.26528	18.4233	0.803453	Human papillomavirus 157, complete genome	2259331	Viruses	Cossaviricota	Papovaviricetes	Zurhausenvirales	Papillomaviridae	Gammapapillomavirus	Gammapapillomavirus 12	Human papillomavirus 157	Human papillomavirus 157	14614028	Run1	DNA	Human	10% to 50%
D-Ambavadi-Sept2	GU191019.1	34177	5787	401	1.20657	16.9324	0.802861	Human adenovirus 18 isolate D.C., complete genome	10528	Viruses	Preplasmiviricota	Tectiliviricetes	Rowavirales	Adenoviridae	Mastadenovirus	Human mastadenovirus A	Human adenovirus 18	Human adenovirus 18	14614028	Run1	DNA	Human	10% to 50%
D-Ambavadi-Sept2	MF588705.1	7298	1514	80	1.15739	20.7454	0.750095	Gammapapillomavirus 8 isolate Gamma08_EV07c390, complete genome	1175850	Viruses	Cossaviricota	Papovaviricetes	Zurhausenvirales	Papillomaviridae	Gammapapillomavirus	Gammapapillomavirus 8	unclassified Gammapapillomavirus 8 subspecies/strain	unclassified Gammapapillomavirus 8 strain	14614028	Run1	DNA	Human	10% to 50%
D-Ambavadi-Sept2	MF588708.1	7273	1410	77	1.11751	19.3868	0.724448	Gammapapillomavirus 8 isolate Gamma08_w20c01b, complete genome	1175850	Viruses	Cossaviricota	Papovaviricetes	Zurhausenvirales	Papillomaviridae	Gammapapillomavirus	Gammapapillomavirus 8	unclassified Gammapapillomavirus 8 subspecies/strain	unclassified Gammapapillomavirus 8 strain	14614028	Run1	DNA	Human	10% to 50%
D-Ambavadi-Sept2	MF588746.1	7300	1205	76	1.1042	16.5068	0.712395	Gammapapillomavirus 24 isolate Gamma24_EV03c40, complete genome	1961681	Viruses	Cossaviricota	Papovaviricetes	Zurhausenvirales	Papillomaviridae	Gammapapillomavirus	Gammapapillomavirus 24	unclassified Gammapapillomavirus 24 subspecies/strain	unclassified Gammapapillomavirus 24 strain	14614028	Run1	DNA	Human	10% to 50%
D-Ambavadi-Sept2	KR816177.1	7275	1318	74	1.04589	18.1168	0.696031	Human papillomavirus type 190 isolate ACS133, complete genome	1851215	Viruses	Cossaviricota	Papovaviricetes	Zurhausenvirales	Papillomaviridae	Gammapapillomavirus	Human papillomavirus type 190	unclassified Human papillomavirus type 190 subspecies/strain	unclassified Human papillomavirus type 190 strain	14614028	Run1	DNA	Human	10% to 50%
D-Ambavadi-Sept2	MF588743.1	7217	1158	66	0.953729	16.0454	0.625774	Gammapapillomavirus 22 isolate Gamma22_w21c693, complete genome	1961679	Viruses	Cossaviricota	Papovaviricetes	Zurhausenvirales	Papillomaviridae	Gammapapillomavirus	Gammapapillomavirus 22	unclassified Gammapapillomavirus 22 subspecies/strain	unclassified Gammapapillomavirus 22 strain	14614028	Run1	DNA	Human	10% to 50%
D-Ambavadi-Sept2	KF006399.1	7203	1155	65	0.933503	16.035	0.61749	Human papillomavirus type 172, complete genome	1434987	Viruses	Cossaviricota	Papovaviricetes	Zurhausenvirales	Papillomaviridae	Gammapapillomavirus	Gammapapillomavirus 22	Human papillomavirus 172	Human papillomavirus 172	14614028	Run1	DNA	Human	10% to 50%
D-Ambavadi-Sept2	HM999994.1	7374	1003	66	0.947121	13.6018	0.61245	Human papillomavirus type 142 isolate GH1302, complete genome	1070415	Viruses	Cossaviricota	Papovaviricetes	Zurhausenvirales	Papillomaviridae	Gammapapillomavirus	Gammapapillomavirus 10	Human papillomavirus 142	Human papillomavirus 142	14614028	Run1	DNA	Human	10% to 50%
D-Ambavadi-Sept2	GQ845441.1	7251	1136	60	0.883819	15.6668	0.566218	Human papillomavirus type 119, complete genome	765051	Viruses	Cossaviricota	Papovaviricetes	Zurhausenvirales	Papillomaviridae	Gammapapillomavirus	Gammapapillomavirus 8	human papillomavirus 119	human papillomavirus 119	14614028	Run1	DNA	Human	10% to 50%
D-Ambavadi-Sept2	KX121164.1	41981	4508	316	0.784586	10.7382	0.515068	Pigeon adenovirus 2 isolate YPDS-Y-V1.A19.11-2013, complete genome	1907767	Viruses	Preplasmiviricota	Tectiliviricetes	Rowavirales	Adenoviridae	Aviadenovirus	Pigeon aviadenovirus B	Pigeon adenovirus 2	Pigeon adenovirus 2	14614028	Run1	DNA	Animal	10% to 50%
D-Ambavadi-Sept2	MF588748.1	7304	1168	53	0.673609	15.9912	0.49653	Gammapapillomavirus 24 isolate Gamma24_m090c66, complete genome	1961681	Viruses	Cossaviricota	Papovaviricetes	Zurhausenvirales	Papillomaviridae	Gammapapillomavirus	Gammapapillomavirus 24	unclassified Gammapapillomavirus 24 subspecies/strain	unclassified Gammapapillomavirus 24 strain	14614028	Run1	DNA	Human	10% to 50%
D-Ambavadi-Sept2	JN032132.1	34762	4213	200	0.550907	12.1196	0.393691	Human adenovirus 14 strain HAdV14-BJ430/CHN2010, complete genome	10521	Viruses	Preplasmiviricota	Tectiliviricetes	Rowavirales	Adenoviridae	Mastadenovirus	Human mastadenovirus B	Human adenovirus 14	Human adenovirus 14	14614028	Run1	DNA	Human	10% to 50%
D-Ambavadi-Sept2	HM049560.1	35203	1312	195	0.594928	3.72696	0.37904	Murine adenovirus 2 isolate K87, complete genome	931972	Viruses	Preplasmiviricota	Tectiliviricetes	Rowavirales	Adenoviridae	Mastadenovirus	Murine mastadenovirus B	Murine adenovirus 2	Murine adenovirus 2	14614028	Run1	DNA	Animal	LESS
D-Ambavadi-Sept2	AF083975.2	45063	2133	141	0.329882	4.73337	0.214106	Fowl adenovirus 9, complete genome	172864	Viruses	Preplasmiviricota	Tectiliviricetes	Rowavirales	Adenoviridae	Aviadenovirus	Fowl aviadenovirus D	Fowl adenovirus 9	Fowl adenovirus 9	14614028	Run1	DNA	Animal	LESS
D-Ambavadi-Sept2	KT862807.1	43337	1764	118	0.276704	4.07042	0.186317	Fowl aviadenovirus 3 strain SR49, complete genome	172860	Viruses	Preplasmiviricota	Tectiliviricetes	Rowavirales	Adenoviridae	Aviadenovirus	Fowl aviadenovirus D	Fowl aviadenovirus 3	Fowl aviadenovirus 3	14614028	Run1	DNA	Animal	LESS
D-Ambavadi-Sept2	MG712775.1	44454	1404	55	0.123239	3.15832	0.0846607	Fowl adenovirus 8b isolate SD1356, complete genome	586029	Viruses	Preplasmiviricota	Tectiliviricetes	Rowavirales	Adenoviridae	Aviadenovirus	Fowl aviadenovirus E	Fowl adenovirus 8b	Fowl adenovirus 8b	14614028	Run1	DNA	Animal	LESS
D-Atladra-Sept1	J02226.1	5130	5089	60812	1265.9	99.2008	2243.96	JC virus complete genome	10632	Viruses	Cossaviricota	Papovaviricetes	Sepolyvirales	Polyomaviridae	Betapolyomavirus	Betapolyomavirus secuhominis	JC polyomavirus	JC polyomavirus	5282706	Run1	DNA	Human	Over 90%
D-Atladra-Sept1	L19443.1	34214	34214	140900	427.152	100	779.562	Human adenovirus F, complete genome	130309	Viruses	Preplasmiviricota	Tectiliviricetes	Rowavirales	Adenoviridae	Mastadenovirus	Human mastadenovirus F	unclassified Human mastadenovirus F subspecies/strain	unclassified Human mastadenovirus F strain	5282706	Run1	DNA	Human	Over 90%
D-Atladra-Sept1	V01108.1	5153	5115	9805	202.485	99.2626	360.189	Human BK virus (strain Dunlop) genome. (Closely related to SV40.)	1891762	Viruses	Cossaviricota	Papovaviricetes	Sepolyvirales	Polyomaviridae	Betapolyomavirus	Betapolyomavirus hominis	unclassified Betapolyomavirus hominis subspecies/strain	unclassified Betapolyomavirus hominis strain	5282706	Run1	DNA	Human	Over 90%
D-Atladra-Sept1	KY316160.1	34169	33876	52648	159.038	99.1425	291.671	Human adenovirus 41 isolate SH/2015/D16, complete genome	10524	Viruses	Preplasmiviricota	Tectiliviricetes	Rowavirales	Adenoviridae	Mastadenovirus	Human mastadenovirus F	Human adenovirus 41	Human adenovirus 41	5282706	Run1	DNA	Human	Over 90%
D-Atladra-Sept1	AF043303.1	4679	4052	2464	56.0671	86.5997	99.6853	Adeno-associated virus 2, complete genome	10804	Viruses	Cossaviricota	Quintoviricetes	Piccovirales	Parvoviridae	Dependoparvovirus	Adeno-associated dependoparvovirus A	adeno-associated virus 2	adeno-associated virus 2	5282706	Run1	DNA	Human	50% to 90%
D-Atladra-Sept1	EU233812.1	4139	2137	1192	31.0281	51.6308	54.5161	Anopheles gambiae densonucleosis virus, complete genome	487311	Viruses	Cossaviricota	Quintoviricetes	Piccovirales	Parvoviridae	Brevihamaparvovirus	Dipteran brevihamaparvovirus 1	Anopheles gambiae densovirus	Anopheles gambiae densovirus	5282706	Run1	DNA	Insect	50% to 90%
D-Atladra-Sept1	FJ973560.1	4958	2051	1415	27.0077	41.3675	54.0248	Human bocavirus 2b NI strain HBoV2B-NI-213, complete genome	1511881	Viruses	Cossaviricota	Quintoviricetes	Piccovirales	Parvoviridae	Bocaparvovirus	Primate bocaparvovirus 2	Human bocavirus 2b NI	Human bocavirus 2b NI	5282706	Run1	DNA	Human	10% to 50%
D-Atladra-Sept1	MF118167.1	3925	1669	1119	30.0932	42.5223	53.9677	Human fecal virus Jorvi2, complete genome	2017081	Viruses	Cressdnaviricota	Arfiviricetes	Cirlivirales	Circoviridae	unclassified Circoviridae genus	Human fecal virus Jorvi2	unclassified Human fecal virus Jorvi2 subspecies/strain	unclassified Human fecal virus Jorvi2 strain	5282706	Run1	DNA	Human	10% to 50%
D-Atladra-Sept1	NC_012042.1	5196	2766	1247	24.1467	53.2333	45.4298	Human bocavirus 2c PK isolate PK-5510, complete genome	1511882	Viruses	Cossaviricota	Quintoviricetes	Piccovirales	Parvoviridae	Bocaparvovirus	Primate bocaparvovirus 2	Human bocavirus 2c PK	Human bocavirus 2c PK	5282706	Run1	DNA	Human	50% to 90%
D-Atladra-Sept1	NC_012564.1	5242	2724	727	12.9929	51.9649	26.2531	Human bocavirus 3, complete genome	638313	Viruses	Cossaviricota	Quintoviricetes	Piccovirales	Parvoviridae	Bocaparvovirus	Primate bocaparvovirus 1	Human bocavirus 3	Human bocavirus 3	5282706	Run1	DNA	Human	50% to 90%
D-Atladra-Sept1	X70828.1	7348	5440	738	10.5892	74.0338	19.0121	Human papillomavirus type 63 complete genome	28311	Viruses	Cossaviricota	Papovaviricetes	Zurhausenvirales	Papillomaviridae	Mupapillomavirus	Mupapillomavirus 2	Human papillomavirus type 63	Human papillomavirus type 63	5282706	Run1	DNA	Human	50% to 90%
D-Atladra-Sept1	NC_001356.1	7815	4701	706	9.379	60.1536	17.1009	Human papillomavirus - 1, complete genome	334203	Viruses	Cossaviricota	Papovaviricetes	Zurhausenvirales	Papillomaviridae	Mupapillomavirus	Mupapillomavirus 1	unclassified Mupapillomavirus 1 subspecies/strain	unclassified Mupapillomavirus 1 strain	5282706	Run1	DNA	Human	50% to 90%
D-Atladra-Sept1	JQ326209.1	35153	21150	3099	9.2177	60.1656	16.6879	Human adenovirus 19, complete genome	28278	Viruses	Preplasmiviricota	Tectiliviricetes	Rowavirales	Adenoviridae	Mastadenovirus	Human mastadenovirus D	Human adenovirus 19	Human adenovirus 19	5282706	Run1	DNA	Human	50% to 90%
D-Atladra-Sept1	KX868289.2	33676	20669	2552	7.83908	61.3761	14.3451	Human adenovirus 12 isolate GyK010, complete genome	28282	Viruses	Preplasmiviricota	Tectiliviricetes	Rowavirales	Adenoviridae	Mastadenovirus	Human mastadenovirus A	Human adenovirus 12	Human adenovirus 12	5282706	Run1	DNA	Human	50% to 90%
D-Atladra-Sept1	X70829.1	7308	3774	499	7.35261	51.642	12.9254	Human papillomavirus type 65 complete genome	28312	Viruses	Cossaviricota	Papovaviricetes	Zurhausenvirales	Papillomaviridae	Gammapapillomavirus	Gammapapillomavirus 1	Human papillomavirus 65	Human papillomavirus 65	5282706	Run1	DNA	Human	50% to 90%
D-Atladra-Sept1	AM749299.1	33763	18476	2114	6.55937	54.7226	11.8524	Human adenovirus type 31 complete genome, serotype 31	10529	Viruses	Preplasmiviricota	Tectiliviricetes	Rowavirales	Adenoviridae	Mastadenovirus	Human mastadenovirus A	Human adenovirus 31	Human adenovirus 31	5282706	Run1	DNA	Human	50% to 90%
D-Atladra-Sept1	M19296.1	5323	1395	323	6.74425	26.207	11.4866	Canine parvovirus strain CPV-N, complete cds	10788	Viruses	Cossaviricota	Quintoviricetes	Piccovirales	Parvoviridae	Protoparvovirus	Carnivore protoparvovirus 1	Canine parvovirus	Canine parvovirus	5282706	Run1	DNA	Animal	10% to 50%
D-Atladra-Sept1	AB448776.1	35215	17923	2110	6.24512	50.8959	11.3422	Human adenovirus 37 genomic DNA, complete genome, isolate: 1991	52275	Viruses	Preplasmiviricota	Tectiliviricetes	Rowavirales	Adenoviridae	Mastadenovirus	Human mastadenovirus D	Human adenovirus D37	Human adenovirus D37	5282706	Run1	DNA	Human	50% to 90%
D-Atladra-Sept1	AF108105.1	35100	17424	1918	5.7323	49.641	10.3439	Human adenovirus type 17 complete genome	46922	Viruses	Preplasmiviricota	Tectiliviricetes	Rowavirales	Adenoviridae	Mastadenovirus	Human mastadenovirus D	Human adenovirus 17	Human adenovirus 17	5282706	Run1	DNA	Human	10% to 50%
D-Atladra-Sept1	Y15176.1	7427	2235	306	3.95768	30.0929	7.79923	Human papillomavirus type 80 E6, E7, E1, E2, E4, L2, and L1 genes	69987	Viruses	Cossaviricota	Papovaviricetes	Zurhausenvirales	Papillomaviridae	Betapapillomavirus	Betapapillomavirus 2	Human papillomavirus 80	Human papillomavirus 80	5282706	Run1	DNA	Human	10% to 50%
D-Atladra-Sept1	HM011556.1	5387	2415	202	3.93985	44.8301	7.0982	Merkel cell polyomavirus isolate R17b, complete genome	493803	Viruses	Cossaviricota	Papovaviricetes	Sepolyvirales	Polyomaviridae	Alphapolyomavirus	Alphapolyomavirus quintihominis	Merkel cell polyomavirus	Merkel cell polyomavirus	5282706	Run1	DNA	Human	10% to 50%
D-Atladra-Sept1	KF006399.1	7203	1691	260	3.87594	23.4763	6.83288	Human papillomavirus type 172, complete genome	1434987	Viruses	Cossaviricota	Papovaviricetes	Zurhausenvirales	Papillomaviridae	Gammapapillomavirus	Gammapapillomavirus 22	Human papillomavirus 172	Human papillomavirus 172	5282706	Run1	DNA	Human	10% to 50%
D-Atladra-Sept1	U31790.1	7184	2798	220	3.16662	38.9477	5.79695	Human papillomavirus type 50, complete genome	40539	Viruses	Cossaviricota	Papovaviricetes	Zurhausenvirales	Papillomaviridae	Gammapapillomavirus	Gammapapillomavirus 3	Human papillomavirus type 50	Human papillomavirus type 50	5282706	Run1	DNA	Human	10% to 50%
D-Atladra-Sept1	GQ845444.1	7397	1954	202	2.9001	26.4161	5.16939	Human papillomavirus type 122, complete genome	765054	Viruses	Cossaviricota	Papovaviricetes	Zurhausenvirales	Papillomaviridae	Betapapillomavirus	Betapapillomavirus 2	Human papillomavirus 122	Human papillomavirus 122	5282706	Run1	DNA	Human	10% to 50%
D-Atladra-Sept1	MF588734.1	7214	1363	177	2.31328	18.8938	4.64452	Gammapapillomavirus 22 isolate Gamma22_do1c02, complete genome	1961679	Viruses	Cossaviricota	Papovaviricetes	Zurhausenvirales	Papillomaviridae	Gammapapillomavirus	Gammapapillomavirus 22	unclassified Gammapapillomavirus 22 subspecies/strain	unclassified Gammapapillomavirus 22 strain	5282706	Run1	DNA	Human	10% to 50%
D-Atladra-Sept1	X01457.1	5176	1289	107	2.28472	24.9034	3.91321	Parvovirus h-1, complete genome	10799	Viruses	Cossaviricota	Quintoviricetes	Piccovirales	Parvoviridae	Protoparvovirus	Rodent protoparvovirus 1	H-1 parvovirus	H-1 parvovirus	5282706	Run1	DNA	Human	10% to 50%
D-Atladra-Sept1	X74469.1	7427	1281	146	2.13783	17.2479	3.7212	Human papillomavirus type 17 genomic DNA	10607	Viruses	Cossaviricota	Papovaviricetes	Zurhausenvirales	Papillomaviridae	Betapapillomavirus	Betapapillomavirus 2	Human papillomavirus 17	Human papillomavirus 17	5282706	Run1	DNA	Human	10% to 50%
D-Atladra-Sept1	MF588756.1	7230	1123	138	2.04336	15.5325	3.61314	Gammapapillomavirus sp. isolate GammaiDysk6_wg1c05, complete genome	2049444	Viruses	Cossaviricota	Papovaviricetes	Zurhausenvirales	Papillomaviridae	Gammapapillomavirus	Gammapapillomavirus sp.	unclassified Gammapapillomavirus sp. subspecies/strain	unclassified Gammapapillomavirus sp. strain	5282706	Run1	DNA	Human	10% to 50%
D-Atladra-Sept1	EF467176.1	7326	1069	109	1.61357	14.5919	2.81646	Human papillomavirus type 88, complete genome	337054	Viruses	Cossaviricota	Papovaviricetes	Zurhausenvirales	Papillomaviridae	Gammapapillomavirus	Gammapapillomavirus 5	Human papillomavirus type 88	Human papillomavirus type 88	5282706	Run1	DNA	Human	10% to 50%
D-Atladra-Sept1	U31781.1	7324	1289	106	1.55185	17.5997	2.73969	Human papillomavirus type 23, complete genome	37955	Viruses	Cossaviricota	Papovaviricetes	Zurhausenvirales	Papillomaviridae	Betapapillomavirus	Betapapillomavirus 2	Human papillomavirus 23	Human papillomavirus 23	5282706	Run1	DNA	Human	10% to 50%
D-Atladra-Sept1	MF588739.1	7260	1405	102	1.4993	19.3526	2.65954	Gammapapillomavirus 22 isolate Gamma22_TVMBSWc141, complete genome	1961679	Viruses	Cossaviricota	Papovaviricetes	Zurhausenvirales	Papillomaviridae	Gammapapillomavirus	Gammapapillomavirus 22	unclassified Gammapapillomavirus 22 subspecies/strain	unclassified Gammapapillomavirus 22 strain	5282706	Run1	DNA	Human	10% to 50%
D-Atladra-Sept1	MF588698.1	7319	1092	97	1.40368	14.9201	2.50879	Gammapapillomavirus 7 isolate Gamma07_EV03c05, complete genome	1175849	Viruses	Cossaviricota	Papovaviricetes	Zurhausenvirales	Papillomaviridae	Gammapapillomavirus	Gammapapillomavirus 7	unclassified Gammapapillomavirus 7 subspecies/strain	unclassified Gammapapillomavirus 7 strain	5282706	Run1	DNA	Human	10% to 50%
D-Atladra-Sept1	NC_045512.2	29903	3359	326	1.13313	11.233	2.0637	Severe acute respiratory syndrome coronavirus 2 isolate Wuhan-Hu-1, complete genome	2697049	Viruses	Pisuviricota	Pisoniviricetes	Nidovirales	Coronaviridae	Betacoronavirus	Severe acute respiratory syndrome-related coronavirus	Severe acute respiratory syndrome coronavirus 2	Severe acute respiratory syndrome coronavirus 2	5282706	Run1	RNA	Human	10% to 50%
D-Atladra-Sept1	HF930491.1	7359	1029	80	1.18116	13.9829	2.05785	Human papillomavirus type 174 complete genome, isolate V001	1347832	Viruses	Cossaviricota	Papovaviricetes	Zurhausenvirales	Papillomaviridae	Betapapillomavirus	Betapapillomavirus 2	Human papillomavirus 174	Human papillomavirus 174	5282706	Run1	DNA	Human	10% to 50%
D-Atladra-Sept1	AB746853.1	34978	4262	296	0.860601	12.1848	1.60192	Human adenovirus 8 DNA, complete genome, strain: Trim variant	31545	Viruses	Preplasmiviricota	Tectiliviricetes	Rowavirales	Adenoviridae	Mastadenovirus	Human mastadenovirus D	Human adenovirus D8	Human adenovirus D8	5282706	Run1	DNA	Human	10% to 50%
D-Atladra-Sept1	MF502426.1	35341	2068	203	0.560456	5.85156	1.08733	Human adenovirus 21 isolate OHT-006, complete genome	32608	Viruses	Preplasmiviricota	Tectiliviricetes	Rowavirales	Adenoviridae	Mastadenovirus	Human mastadenovirus B	Human adenovirus 21	Human adenovirus 21	5282706	Run1	DNA	Human	LESS
D-Atladra-Sept1	MH355567.1	35217	1432	148	0.388228	4.06622	0.795523	Human adenovirus 7 strain BJ/CHN/2018, complete genome	10519	Viruses	Preplasmiviricota	Tectiliviricetes	Rowavirales	Adenoviridae	Mastadenovirus	Human mastadenovirus B	Human adenovirus 7	Human adenovirus 7	5282706	Run1	DNA	Human	LESS
D-Atladra-Sept1	AF083975.2	45063	1657	82	0.187229	3.67707	0.344459	Fowl adenovirus 9, complete genome	172864	Viruses	Preplasmiviricota	Tectiliviricetes	Rowavirales	Adenoviridae	Aviadenovirus	Fowl aviadenovirus D	Fowl adenovirus 9	Fowl adenovirus 9	5282706	Run1	DNA	Animal	LESS
D-Atladra-Sept2	V01108.1	5153	5126	449091	9265.14	99.476	8658.42	Human BK virus (strain Dunlop) genome. (Closely related to SV40.)	1891762	Viruses	Cossaviricota	Papovaviricetes	Sepolyvirales	Polyomaviridae	Betapolyomavirus	Betapolyomavirus hominis	unclassified Betapolyomavirus hominis subspecies/strain	unclassified Betapolyomavirus hominis strain	10065508	Run1	DNA	Human	Over 90%
D-Atladra-Sept2	J02226.1	5130	5090	88069	1836	99.2203	1705.57	JC virus complete genome	10632	Viruses	Cossaviricota	Papovaviricetes	Sepolyvirales	Polyomaviridae	Betapolyomavirus	Betapolyomavirus secuhominis	JC polyomavirus	JC polyomavirus	10065508	Run1	DNA	Human	Over 90%
D-Atladra-Sept2	L19443.1	34214	34214	536484	1629.4	100	1557.82	Human adenovirus F, complete genome	130309	Viruses	Preplasmiviricota	Tectiliviricetes	Rowavirales	Adenoviridae	Mastadenovirus	Human mastadenovirus F	unclassified Human mastadenovirus F subspecies/strain	unclassified Human mastadenovirus F strain	10065508	Run1	DNA	Human	Over 90%
D-Atladra-Sept2	NC_045512.2	29903	29656	349276	1208.93	99.174	1160.43	Severe acute respiratory syndrome coronavirus 2 isolate Wuhan-Hu-1, complete genome	2697049	Viruses	Pisuviricota	Pisoniviricetes	Nidovirales	Coronaviridae	Betacoronavirus	Severe acute respiratory syndrome-related coronavirus	Severe acute respiratory syndrome coronavirus 2	Severe acute respiratory syndrome coronavirus 2	10065508	Run1	RNA	Human	Over 90%
D-Atladra-Sept2	KY316160.1	34169	34112	237893	719.583	99.8332	691.694	Human adenovirus 41 isolate SH/2015/D16, complete genome	10524	Viruses	Preplasmiviricota	Tectiliviricetes	Rowavirales	Adenoviridae	Mastadenovirus	Human mastadenovirus F	Human adenovirus 41	Human adenovirus 41	10065508	Run1	DNA	Human	Over 90%
D-Atladra-Sept2	MF118167.1	3925	2314	8731	233.852	58.9554	220.998	Human fecal virus Jorvi2, complete genome	2017081	Viruses	Cressdnaviricota	Arfiviricetes	Cirlivirales	Circoviridae	unclassified Circoviridae genus	Human fecal virus Jorvi2	unclassified Human fecal virus Jorvi2 subspecies/strain	unclassified Human fecal virus Jorvi2 strain	10065508	Run1	DNA	Human	50% to 90%
D-Atladra-Sept2	NC_012564.1	5242	5174	11486	223.762	98.7028	217.689	Human bocavirus 3, complete genome	638313	Viruses	Cossaviricota	Quintoviricetes	Piccovirales	Parvoviridae	Bocaparvovirus	Primate bocaparvovirus 1	Human bocavirus 3	Human bocavirus 3	10065508	Run1	DNA	Human	Over 90%
D-Atladra-Sept2	M19296.1	5323	4295	9946	202.292	80.6876	185.633	Canine parvovirus strain CPV-N, complete cds	10788	Viruses	Cossaviricota	Quintoviricetes	Piccovirales	Parvoviridae	Protoparvovirus	Carnivore protoparvovirus 1	Canine parvovirus	Canine parvovirus	10065508	Run1	DNA	Animal	50% to 90%
D-Atladra-Sept2	FJ973560.1	4958	3361	9093	185.064	67.7894	182.207	Human bocavirus 2b NI strain HBoV2B-NI-213, complete genome	1511881	Viruses	Cossaviricota	Quintoviricetes	Piccovirales	Parvoviridae	Bocaparvovirus	Primate bocaparvovirus 2	Human bocavirus 2b NI	Human bocavirus 2b NI	10065508	Run1	DNA	Human	50% to 90%
D-Atladra-Sept2	JQ326209.1	35153	33508	52570	155.958	95.3205	148.573	Human adenovirus 19, complete genome	28278	Viruses	Preplasmiviricota	Tectiliviricetes	Rowavirales	Adenoviridae	Mastadenovirus	Human mastadenovirus D	Human adenovirus 19	Human adenovirus 19	10065508	Run1	DNA	Human	Over 90%
D-Atladra-Sept2	AF043303.1	4679	4502	6556	150.537	96.2171	139.204	Adeno-associated virus 2, complete genome	10804	Viruses	Cossaviricota	Quintoviricetes	Piccovirales	Parvoviridae	Dependoparvovirus	Adeno-associated dependoparvovirus A	adeno-associated virus 2	adeno-associated virus 2	10065508	Run1	DNA	Human	Over 90%
D-Atladra-Sept2	HM011556.1	5387	5387	6080	118.817	100	112.13	Merkel cell polyomavirus isolate R17b, complete genome	493803	Viruses	Cossaviricota	Papovaviricetes	Sepolyvirales	Polyomaviridae	Alphapolyomavirus	Alphapolyomavirus quintihominis	Merkel cell polyomavirus	Merkel cell polyomavirus	10065508	Run1	DNA	Human	Over 90%
D-Atladra-Sept2	AF108105.1	35100	31249	34967	104.063	89.0285	98.9727	Human adenovirus type 17 complete genome	46922	Viruses	Preplasmiviricota	Tectiliviricetes	Rowavirales	Adenoviridae	Mastadenovirus	Human mastadenovirus D	Human adenovirus 17	Human adenovirus 17	10065508	Run1	DNA	Human	50% to 90%
D-Atladra-Sept2	AB448776.1	35215	31206	34269	101.662	88.6156	96.6803	Human adenovirus 37 genomic DNA, complete genome, isolate: 1991	52275	Viruses	Preplasmiviricota	Tectiliviricetes	Rowavirales	Adenoviridae	Mastadenovirus	Human mastadenovirus D	Human adenovirus D37	Human adenovirus D37	10065508	Run1	DNA	Human	50% to 90%
D-Atladra-Sept2	NC_012042.1	5196	3522	3407	63.5896	67.7829	65.1429	Human bocavirus 2c PK isolate PK-5510, complete genome	1511882	Viruses	Cossaviricota	Quintoviricetes	Piccovirales	Parvoviridae	Bocaparvovirus	Primate bocaparvovirus 2	Human bocavirus 2c PK	Human bocavirus 2c PK	10065508	Run1	DNA	Human	50% to 90%
D-Atladra-Sept2	GQ845442.1	7304	7246	4726	67.1672	99.2059	64.2832	Human papillomavirus type 120, complete genome	765052	Viruses	Cossaviricota	Papovaviricetes	Zurhausenvirales	Papillomaviridae	Betapapillomavirus	Betapapillomavirus 2	Human papillomavirus 120	Human papillomavirus 120	10065508	Run1	DNA	Human	Over 90%
D-Atladra-Sept2	NC_001356.1	7815	7668	4611	61.8865	98.119	58.6179	Human papillomavirus - 1, complete genome	334203	Viruses	Cossaviricota	Papovaviricetes	Zurhausenvirales	Papillomaviridae	Mupapillomavirus	Mupapillomavirus 1	unclassified Mupapillomavirus 1 subspecies/strain	unclassified Mupapillomavirus 1 strain	10065508	Run1	DNA	Human	Over 90%
D-Atladra-Sept2	X70829.1	7308	7308	3950	56.0613	100	53.6986	Human papillomavirus type 65 complete genome	28312	Viruses	Cossaviricota	Papovaviricetes	Zurhausenvirales	Papillomaviridae	Gammapapillomavirus	Gammapapillomavirus 1	Human papillomavirus 65	Human papillomavirus 65	10065508	Run1	DNA	Human	Over 90%
D-Atladra-Sept2	KX384958.1	35250	33567	18607	55.0922	95.2255	52.4423	Human adenovirus B3 strain T382/Ft Jackson South Carolina USA/2002, complete genome	45659	Viruses	Preplasmiviricota	Tectiliviricetes	Rowavirales	Adenoviridae	Mastadenovirus	Human mastadenovirus B	Human adenovirus B3	Human adenovirus B3	10065508	Run1	DNA	Human	Over 90%
D-Atladra-Sept2	AM749299.1	33763	33135	16735	51.6656	98.14	49.2435	Human adenovirus type 31 complete genome, serotype 31	10529	Viruses	Preplasmiviricota	Tectiliviricetes	Rowavirales	Adenoviridae	Mastadenovirus	Human mastadenovirus A	Human adenovirus 31	Human adenovirus 31	10065508	Run1	DNA	Human	Over 90%
D-Atladra-Sept2	X70828.1	7348	7308	3553	51.5468	99.4556	48.0386	Human papillomavirus type 63 complete genome	28311	Viruses	Cossaviricota	Papovaviricetes	Zurhausenvirales	Papillomaviridae	Mupapillomavirus	Mupapillomavirus 2	Human papillomavirus type 63	Human papillomavirus type 63	10065508	Run1	DNA	Human	Over 90%
D-Atladra-Sept2	AC_000008.1	35938	30751	14424	40.989	85.5668	39.8746	Human adenovirus 5, complete genome	28285	Viruses	Preplasmiviricota	Tectiliviricetes	Rowavirales	Adenoviridae	Mastadenovirus	Human mastadenovirus C	Human adenovirus 5	Human adenovirus 5	10065508	Run1	DNA	Human	50% to 90%
D-Atladra-Sept2	EU233812.1	4139	3070	1592	40.7358	74.1725	38.2131	Anopheles gambiae densonucleosis virus, complete genome	487311	Viruses	Cossaviricota	Quintoviricetes	Piccovirales	Parvoviridae	Brevihamaparvovirus	Dipteran brevihamaparvovirus 1	Anopheles gambiae densovirus	Anopheles gambiae densovirus	10065508	Run1	DNA	Insect	50% to 90%
D-Atladra-Sept2	MF588686.1	7438	1248	2564	268.804	16.7787	34.2473	Betapapillomavirus 4 isolate Beta04_TVMGc2024, complete genome	334208	Viruses	Cossaviricota	Papovaviricetes	Zurhausenvirales	Papillomaviridae	Betapapillomavirus	Betapapillomavirus 4	unclassified Betapapillomavirus 4 subspecies/strain	unclassified Betapapillomavirus 4 strain	10065508	Run1	DNA	Human	10% to 50%
D-Atladra-Sept2	AC_000007.1	35937	31006	11941	34.2571	86.2788	33.0113	Human adenovirus 2, complete genome	10515	Viruses	Preplasmiviricota	Tectiliviricetes	Rowavirales	Adenoviridae	Mastadenovirus	Human mastadenovirus C	Human adenovirus 2	Human adenovirus 2	10065508	Run1	DNA	Human	50% to 90%
D-Atladra-Sept2	U31781.1	7324	6726	1963	27.9937	91.8351	26.6279	Human papillomavirus type 23, complete genome	37955	Viruses	Cossaviricota	Papovaviricetes	Zurhausenvirales	Papillomaviridae	Betapapillomavirus	Betapapillomavirus 2	Human papillomavirus 23	Human papillomavirus 23	10065508	Run1	DNA	Human	Over 90%
D-Atladra-Sept2	KX868289.2	33676	30690	8717	26.8698	91.1332	25.7164	Human adenovirus 12 isolate GyK010, complete genome	28282	Viruses	Preplasmiviricota	Tectiliviricetes	Rowavirales	Adenoviridae	Mastadenovirus	Human mastadenovirus A	Human adenovirus 12	Human adenovirus 12	10065508	Run1	DNA	Human	Over 90%
D-Atladra-Sept2	BK000400.1	33034	28392	8150	25.8329	85.9478	24.511	TPA: Bovine adenovirus 2, complete genome	NA	Viruses	Preplasmiviricota	Tectiliviricetes	Rowavirales	Adenoviridae	Mastadenovirus	Mastadenovirus bovidae	Bovine adenovirus	Bovine adenovirus 2	10065508	Run1	DNA	Animal	50% to 90%
D-Atladra-Sept2	U31780.1	7368	6629	1694	24.1201	89.9701	22.8417	Human papillomavirus type 22, complete genome	37954	Viruses	Cossaviricota	Papovaviricetes	Zurhausenvirales	Papillomaviridae	Betapapillomavirus	Betapapillomavirus 2	Human papillomavirus 22	Human papillomavirus 22	10065508	Run1	DNA	Human	50% to 90%
D-Atladra-Sept2	JN860680.1	35384	26337	7369	21.0767	74.4319	20.6903	Human adenovirus 16 strain E26, complete genome	31544	Viruses	Preplasmiviricota	Tectiliviricetes	Rowavirales	Adenoviridae	Mastadenovirus	Human mastadenovirus B	Human adenovirus 16	Human adenovirus 16	10065508	Run1	DNA	Human	50% to 90%
D-Atladra-Sept2	AF495467.1	5097	1626	951	19.6208	31.9011	18.5366	Minute virus of canines non structural protein 1, NP1, virus protein 1, and virus protein 2 genes, complete cds	329639	Viruses	Cossaviricota	Quintoviricetes	Piccovirales	Parvoviridae	Bocaparvovirus	Carnivore bocaparvovirus 1	Canine minute virus	Canine minute virus	10065508	Run1	DNA	Animal	10% to 50%
D-Atladra-Sept2	M32305.1	7726	6614	1300	17.8219	85.607	16.7168	Human papillomavirus type 47 (HPV-47) +-sense strand	10594	Viruses	Cossaviricota	Papovaviricetes	Zurhausenvirales	Papillomaviridae	Betapapillomavirus	Betapapillomavirus 1	human papillomavirus 47	human papillomavirus 47	10065508	Run1	DNA	Human	50% to 90%
D-Atladra-Sept2	U31782.1	7452	5836	1239	17.6847	78.3145	16.5182	Human papillomavirus type 24, complete genome	37956	Viruses	Cossaviricota	Papovaviricetes	Zurhausenvirales	Papillomaviridae	Betapapillomavirus	Betapapillomavirus 1	human papillomavirus 24	human papillomavirus 24	10065508	Run1	DNA	Human	50% to 90%
D-Atladra-Sept2	GQ845444.1	7397	5887	1227	17.4616	79.5863	16.4798	Human papillomavirus type 122, complete genome	765054	Viruses	Cossaviricota	Papovaviricetes	Zurhausenvirales	Papillomaviridae	Betapapillomavirus	Betapapillomavirus 2	Human papillomavirus 122	Human papillomavirus 122	10065508	Run1	DNA	Human	50% to 90%
D-Atladra-Sept2	Y15176.1	7427	6129	1150	16.3038	82.5232	15.3833	Human papillomavirus type 80 E6, E7, E1, E2, E4, L2, and L1 genes	69987	Viruses	Cossaviricota	Papovaviricetes	Zurhausenvirales	Papillomaviridae	Betapapillomavirus	Betapapillomavirus 2	Human papillomavirus 80	Human papillomavirus 80	10065508	Run1	DNA	Human	50% to 90%
D-Atladra-Sept2	AB746853.1	34978	16372	5248	15.3228	46.8066	14.9061	Human adenovirus 8 DNA, complete genome, strain: Trim variant	31545	Viruses	Preplasmiviricota	Tectiliviricetes	Rowavirales	Adenoviridae	Mastadenovirus	Human mastadenovirus D	Human adenovirus D8	Human adenovirus D8	10065508	Run1	DNA	Human	10% to 50%
D-Atladra-Sept2	AY461507.1	6034	1845	859	14.468	30.5767	14.1433	Mythimna loreyi densovirus, complete genome	185636	Viruses	Cossaviricota	Quintoviricetes	Piccovirales	Parvoviridae	Ambidensovirus	Lepidopteran ambidensovirus 1	Mythimna loreyi densovirus	Mythimna loreyi densovirus	10065508	Run1	DNA	Insect	10% to 50%
D-Atladra-Sept2	FJ947080.1	7476	6188	1061	15.1373	82.7715	14.0997	Human papillomavirus type 115 isolate GC02, complete genome	696746	Viruses	Cossaviricota	Papovaviricetes	Zurhausenvirales	Papillomaviridae	Betapapillomavirus	Betapapillomavirus 3	human papillomavirus 115	human papillomavirus 115	10065508	Run1	DNA	Human	50% to 90%
D-Atladra-Sept2	MT505439.1	34777	23802	4748	14.065	68.4418	13.5638	Human adenovirus 11 strain HAdV-B2/USA_GA/8348/2019/P11H11F12, complete genome	10541	Viruses	Preplasmiviricota	Tectiliviricetes	Rowavirales	Adenoviridae	Mastadenovirus	Human mastadenovirus B	Human adenovirus 11	Human adenovirus 11	10065508	Run1	DNA	Human	50% to 90%
D-Atladra-Sept2	FM955841.1	7667	5455	1034	13.8523	71.1491	13.3986	Human papillomavirus type 105, complete genome	587350	Viruses	Cossaviricota	Papovaviricetes	Zurhausenvirales	Papillomaviridae	Betapapillomavirus	Betapapillomavirus 1	Human papillomavirus 105	Human papillomavirus 105	10065508	Run1	DNA	Human	50% to 90%
D-Atladra-Sept2	X74469.1	7427	5944	879	12.4599	80.0323	11.7582	Human papillomavirus type 17 genomic DNA	10607	Viruses	Cossaviricota	Papovaviricetes	Zurhausenvirales	Papillomaviridae	Betapapillomavirus	Betapapillomavirus 2	Human papillomavirus 17	Human papillomavirus 17	10065508	Run1	DNA	Human	50% to 90%
D-Atladra-Sept2	FM955842.1	7412	5074	849	12.0487	68.4566	11.3799	Human papillomavirus type 113, complete genome	587351	Viruses	Cossaviricota	Papovaviricetes	Zurhausenvirales	Papillomaviridae	Betapapillomavirus	Betapapillomavirus 2	Human papillomavirus 113	Human papillomavirus 113	10065508	Run1	DNA	Human	50% to 90%
D-Atladra-Sept2	M12737.1	7654	5422	869	11.953	70.8388	11.2796	Human papillomavirus type 8, complete genome	10579	Viruses	Cossaviricota	Papovaviricetes	Zurhausenvirales	Papillomaviridae	Betapapillomavirus	Betapapillomavirus 1	Human papillomavirus type 8	Human papillomavirus type 8	10065508	Run1	DNA	Human	50% to 90%
D-Atladra-Sept2	S47266.1	5908	1588	662	9.98489	26.8788	11.1322	orf1...orf4 [Junonia coenia densovirus JcDNV, Genomic Complete, 4 genes, 5908 nt]	12524	Viruses	Cossaviricota	Quintoviricetes	Piccovirales	Parvoviridae	Ambidensovirus	Lepidopteran ambidensovirus 1	Junonia coenia densovirus	Junonia coenia densovirus	10065508	Run1	DNA	Insect	10% to 50%
D-Atladra-Sept2	U31790.1	7184	4552	774	11.2026	63.363	10.7038	Human papillomavirus type 50, complete genome	40539	Viruses	Cossaviricota	Papovaviricetes	Zurhausenvirales	Papillomaviridae	Gammapapillomavirus	Gammapapillomavirus 3	Human papillomavirus type 50	Human papillomavirus type 50	10065508	Run1	DNA	Human	50% to 90%
D-Atladra-Sept2	EU410348.1	7423	5078	777	11.2128	68.409	10.3993	Human papillomavirus type 110, complete genome	518629	Viruses	Cossaviricota	Papovaviricetes	Zurhausenvirales	Papillomaviridae	Betapapillomavirus	Betapapillomavirus 2	Human papillomavirus 110	Human papillomavirus 110	10065508	Run1	DNA	Human	50% to 90%
D-Atladra-Sept2	M17463.1	7746	5111	767	10.5254	65.9824	9.83744	Human papillomoavirus type 5, complete genome	333923	Viruses	Cossaviricota	Papovaviricetes	Zurhausenvirales	Papillomaviridae	Betapapillomavirus	Betapapillomavirus 1	Human papillomavirus 5	Human papillomavirus 5	10065508	Run1	DNA	Human	50% to 90%
D-Atladra-Sept2	EF422221.1	7562	4389	744	25.2709	58.0402	9.77464	Human papillomavirus type 107, complete genome	427343	Viruses	Cossaviricota	Papovaviricetes	Zurhausenvirales	Papillomaviridae	Betapapillomavirus	Betapapillomavirus 2	Human papillomavirus 107	Human papillomavirus 107	10065508	Run1	DNA	Human	50% to 90%
D-Atladra-Sept2	KX121164.1	41981	26299	4019	9.99835	62.645	9.51107	Pigeon adenovirus 2 isolate YPDS-Y-V1.A19.11-2013, complete genome	1907767	Viruses	Preplasmiviricota	Tectiliviricetes	Rowavirales	Adenoviridae	Aviadenovirus	Pigeon aviadenovirus B	Pigeon adenovirus 2	Pigeon adenovirus 2	10065508	Run1	DNA	Animal	50% to 90%
D-Atladra-Sept2	GU191019.1	34177	19577	3152	9.61181	57.2812	9.16255	Human adenovirus 18 isolate D.C., complete genome	10528	Viruses	Preplasmiviricota	Tectiliviricetes	Rowavirales	Adenoviridae	Mastadenovirus	Human mastadenovirus A	Human adenovirus 18	Human adenovirus 18	10065508	Run1	DNA	Human	50% to 90%
D-Atladra-Sept2	JX262162.1	4939	3257	455	9.82418	65.9445	9.15244	Human polyomavirus 10 isolate 10ww, complete genome	1208309	Viruses	Cossaviricota	Papovaviricetes	Sepolyvirales	Polyomaviridae	Deltapolyomavirus	Deltapolyomavirus decihominis	unclassified Deltapolyomavirus decihominis subspecies/strain	unclassified Deltapolyomavirus decihominis strain	10065508	Run1	DNA	Human	50% to 90%
D-Atladra-Sept2	HF930491.1	7359	5046	674	9.70953	68.5691	9.09925	Human papillomavirus type 174 complete genome, isolate V001	1347832	Viruses	Cossaviricota	Papovaviricetes	Zurhausenvirales	Papillomaviridae	Betapapillomavirus	Betapapillomavirus 2	Human papillomavirus 174	Human papillomavirus 174	10065508	Run1	DNA	Human	50% to 90%
D-Atladra-Sept2	FM955839.1	7380	4541	629	8.97912	61.5312	8.46757	Human papillomavirus type 100, complete genome	587349	Viruses	Cossaviricota	Papovaviricetes	Zurhausenvirales	Papillomaviridae	Betapapillomavirus	Betapapillomavirus 2	Human papillomavirus 100	Human papillomavirus 100	10065508	Run1	DNA	Human	50% to 90%
D-Atladra-Sept2	U31786.1	7421	4374	618	8.69509	58.9408	8.27352	Human papillomavirus type 37, complete genome	37958	Viruses	Cossaviricota	Papovaviricetes	Zurhausenvirales	Papillomaviridae	Betapapillomavirus	Betapapillomavirus 2	Human papillomavirus 37	Human papillomavirus 37	10065508	Run1	DNA	Human	50% to 90%
D-Atladra-Sept2	HM999999.1	7224	4381	594	8.7348	60.6451	8.16908	Human papillomavirus type 147 isolate GH659, complete genome	1070420	Viruses	Cossaviricota	Papovaviricetes	Zurhausenvirales	Papillomaviridae	Gammapapillomavirus	Gammapapillomavirus 8	human papillomavirus 147	human papillomavirus 147	10065508	Run1	DNA	Human	50% to 90%
D-Atladra-Sept2	U31787.1	7400	4596	598	8.63766	62.1081	8.02849	Human papillomavirus type 38, complete genome	37959	Viruses	Cossaviricota	Papovaviricetes	Zurhausenvirales	Papillomaviridae	Betapapillomavirus	Betapapillomavirus 2	Human papillomavirus 38	Human papillomavirus 38	10065508	Run1	DNA	Human	50% to 90%
D-Atladra-Sept2	KR816170.1	7416	4580	588	8.27016	61.7584	7.8772	Human papillomavirus type 182 isolate ACS214, complete genome	1851125	Viruses	Cossaviricota	Papovaviricetes	Zurhausenvirales	Papillomaviridae	Betapapillomavirus	Betapapillomavirus 2	Human papillomavirus type 182	Human papillomavirus type 182	10065508	Run1	DNA	Human	50% to 90%
D-Atladra-Sept2	X70827.1	7353	4288	572	8.09274	58.3163	7.72851	Human papillomavirus type 4 complete genome	10617	Viruses	Cossaviricota	Papovaviricetes	Zurhausenvirales	Papillomaviridae	Gammapapillomavirus	Gammapapillomavirus 1	Human papillomavirus 4	Human papillomavirus 4	10065508	Run1	DNA	Human	50% to 90%
D-Atladra-Sept2	MF588729.1	7339	4340	560	8.18041	59.1361	7.58081	Gammapapillomavirus 18 isolate Gamma18_EV03c188, complete genome	1513263	Viruses	Cossaviricota	Papovaviricetes	Zurhausenvirales	Papillomaviridae	Gammapapillomavirus	Gammapapillomavirus 18	unclassified Gammapapillomavirus 18 subspecies/strain	unclassified Gammapapillomavirus 18 strain	10065508	Run1	DNA	Human	50% to 90%
D-Atladra-Sept2	Y15174.1	7549	4692	553	7.85552	62.1539	7.2778	Human papillomavirus type 76 E6, E7, E1, E2, E4, L2, and L1 genes	69985	Viruses	Cossaviricota	Papovaviricetes	Zurhausenvirales	Papillomaviridae	Betapapillomavirus	Betapapillomavirus 3	human papillomavirus 76	human papillomavirus 76	10065508	Run1	DNA	Human	50% to 90%
D-Atladra-Sept2	X74470.1	7685	3704	547	7.39005	48.1978	7.07144	Human papillomavirus type 19 genomic DNA	10608	Viruses	Cossaviricota	Papovaviricetes	Zurhausenvirales	Papillomaviridae	Betapapillomavirus	Betapapillomavirus 1	Human papillomavirus 19	Human papillomavirus 19	10065508	Run1	DNA	Human	10% to 50%
D-Atladra-Sept2	KR816182.1	7569	3820	500	23.4987	50.469	6.5629	Human papillomavirus type 195 isolate ACS380, complete genome	1851220	Viruses	Cossaviricota	Papovaviricetes	Zurhausenvirales	Papillomaviridae	Betapapillomavirus	Betapapillomavirus 1	Human papillomavirus type 195	Human papillomavirus type 195	10065508	Run1	DNA	Human	50% to 90%
D-Atladra-Sept2	X74468.1	7412	3288	482	6.64238	44.3605	6.46065	Human papillomavirus type 15 genomic DNA	10606	Viruses	Cossaviricota	Papovaviricetes	Zurhausenvirales	Papillomaviridae	Betapapillomavirus	Betapapillomavirus 2	Human papillomavirus 15	Human papillomavirus 15	10065508	Run1	DNA	Human	10% to 50%
D-Atladra-Sept2	L32896.1	6039	1612	376	6.4145	26.6932	6.18568	Galleria mellonella densovirus non-structural protein (NS) and capsid protein (VP1,VP2,VP3,VP4) genes, complete cds	37138	Viruses	Cossaviricota	Quintoviricetes	Piccovirales	Parvoviridae	Protoambidensovirus	Lepidopteran protoambidensovirus 1	Galleria mellonella densovirus	Galleria mellonella densovirus	10065508	Run1	DNA	Insect	10% to 50%
D-Atladra-Sept2	MF588745.1	7193	4040	405	6.04842	56.1657	5.59383	Gammapapillomavirus 23 isolate Gamma23_m090c10, complete genome	1961680	Viruses	Cossaviricota	Papovaviricetes	Zurhausenvirales	Papillomaviridae	Gammapapillomavirus	Gammapapillomavirus 23	unclassified Gammapapillomavirus 23 subspecies/strain	unclassified Gammapapillomavirus 23 strain	10065508	Run1	DNA	Human	50% to 90%
D-Atladra-Sept2	X01457.1	5176	1655	290	5.75388	31.9745	5.56632	Parvovirus h-1, complete genome	10799	Viruses	Cossaviricota	Quintoviricetes	Piccovirales	Parvoviridae	Protoparvovirus	Rodent protoparvovirus 1	H-1 parvovirus	H-1 parvovirus	10065508	Run1	DNA	Human	10% to 50%
D-Atladra-Sept2	X74480.1	7560	3364	410	5.78988	44.4974	5.38798	Human papillomavirus type 49 genomic DNA	10616	Viruses	Cossaviricota	Papovaviricetes	Zurhausenvirales	Papillomaviridae	Betapapillomavirus	Betapapillomavirus 3	Human papillomavirus type 49	Human papillomavirus type 49	10065508	Run1	DNA	Human	10% to 50%
D-Atladra-Sept2	HM011560.1	4926	2247	265	5.77178	45.6151	5.34461	Polyomavirus HPyV6 isolate 607a, complete genome	746830	Viruses	Cossaviricota	Papovaviricetes	Sepolyvirales	Polyomaviridae	Deltapolyomavirus	Deltapolyomavirus sextihominis	Human polyomavirus 6	Human polyomavirus 6	10065508	Run1	DNA	Human	10% to 50%
D-Atladra-Sept2	U31779.1	7779	3500	418	5.66509	44.9929	5.33847	Human papillomavirus type 21, complete genome	31548	Viruses	Cossaviricota	Papovaviricetes	Zurhausenvirales	Papillomaviridae	Betapapillomavirus	Betapapillomavirus 1	human papillomavirus 21	human papillomavirus 21	10065508	Run1	DNA	Human	10% to 50%
D-Atladra-Sept2	NC_012729.2	5104	1205	274	3.26625	23.6089	5.3334	Human bocavirus 4 NI strain HBoV4-NI-385, complete genome	1511883	Viruses	Cossaviricota	Quintoviricetes	Piccovirales	Parvoviridae	Bocaparvovirus	Primate bocaparvovirus 2	Human bocavirus 4 NI	Human bocavirus 4 NI	10065508	Run1	DNA	Human	10% to 50%
D-Atladra-Sept2	MF588774.1	1805	914	92	5.47372	50.6371	5.06378	Gammapapillomavirus 15 isolate iGamma15_w34c08a E7 (E7) gene, complete cds	1513260	Viruses	Cossaviricota	Papovaviricetes	Zurhausenvirales	Papillomaviridae	Gammapapillomavirus	Gammapapillomavirus 15	unclassified Gammapapillomavirus 15 subspecies/strain	unclassified Gammapapillomavirus 15 strain	10065508	Run1	DNA	Human	50% to 90%
D-Atladra-Sept2	MF588720.1	7142	3171	331	4.83066	44.3993	4.60439	Gammapapillomavirus 12 isolate Gamma12_w34c11a, complete genome	1513257	Viruses	Cossaviricota	Papovaviricetes	Zurhausenvirales	Papillomaviridae	Gammapapillomavirus	Gammapapillomavirus 12	unclassified Gammapapillomavirus 12 subspecies/strain	unclassified Gammapapillomavirus 12 strain	10065508	Run1	DNA	Human	10% to 50%
D-Atladra-Sept2	HM999997.1	7375	3087	337	4.89329	41.8576	4.53975	Human papillomavirus type 145 isolate CL4112, complete genome	1070418	Viruses	Cossaviricota	Papovaviricetes	Zurhausenvirales	Papillomaviridae	Betapapillomavirus	Betapapillomavirus 2	Human papillomavirus 145	Human papillomavirus 145	10065508	Run1	DNA	Human	10% to 50%
D-Atladra-Sept2	GQ246951.1	7597	3488	345	5.66913	45.9129	4.51171	Human papillomavirus type 118 clone K2, complete genome	927771	Viruses	Cossaviricota	Papovaviricetes	Zurhausenvirales	Papillomaviridae	Betapapillomavirus	Betapapillomavirus 1	human papillomavirus 118	human papillomavirus 118	10065508	Run1	DNA	Human	10% to 50%
D-Atladra-Sept2	MF588712.1	7257	2745	328	4.51541	37.8255	4.49036	Gammapapillomavirus 9 isolate Gamma09_w27c39c, complete genome	1175851	Viruses	Cossaviricota	Papovaviricetes	Zurhausenvirales	Papillomaviridae	Gammapapillomavirus	Gammapapillomavirus 9	unclassified Gammapapillomavirus 9 subspecies/strain	unclassified Gammapapillomavirus 9 strain	10065508	Run1	DNA	Human	10% to 50%
D-Atladra-Sept2	EU410347.1	7401	3093	323	4.59578	41.7916	4.33587	Human papillomavirus FA75/KI88-03, complete genome	563190	Viruses	Cossaviricota	Papovaviricetes	Zurhausenvirales	Papillomaviridae	Betapapillomavirus	Betapapillomavirus 2	Human papillomavirus FA75/KI88-03	Human papillomavirus FA75/KI88-03	10065508	Run1	DNA	Human	10% to 50%
D-Atladra-Sept2	EU410349.1	7384	2670	306	4.21731	36.1593	4.11712	Human papillomavirus type 111, complete genome	518630	Viruses	Cossaviricota	Papovaviricetes	Zurhausenvirales	Papillomaviridae	Betapapillomavirus	Betapapillomavirus 2	Human papillomavirus 111	Human papillomavirus 111	10065508	Run1	DNA	Human	10% to 50%
D-Atladra-Sept2	MF588682.1	7323	3327	303	4.31716	45.4322	4.11072	Betapapillomavirus 2 isolate Beta02_m292c14, complete genome	333924	Viruses	Cossaviricota	Papovaviricetes	Zurhausenvirales	Papillomaviridae	Betapapillomavirus	Betapapillomavirus 2	unclassified Betapapillomavirus 2 subspecies/strain	unclassified Betapapillomavirus 2 strain	10065508	Run1	DNA	Human	10% to 50%
D-Atladra-Sept2	MF588677.1	7550	2510	312	4.40662	33.245	4.10556	Betapapillomavirus 1 isolate Beta01_HIVGc36, complete genome	337051	Viruses	Cossaviricota	Papovaviricetes	Zurhausenvirales	Papillomaviridae	Betapapillomavirus	Betapapillomavirus 1	unclassified Betapapillomavirus 1 subspecies/strain	unclassified Betapapillomavirus 1 strain	10065508	Run1	DNA	Human	10% to 50%
D-Atladra-Sept2	FN677755.1	7436	3183	306	4.43124	42.8053	4.08833	Human papillomavirus type 150, complete genome, isolate SIBX1	743811	Viruses	Cossaviricota	Papovaviricetes	Zurhausenvirales	Papillomaviridae	Betapapillomavirus	Betapapillomavirus 5	human papillomavirus 150	human papillomavirus 150	10065508	Run1	DNA	Human	10% to 50%
D-Atladra-Sept2	Y15173.1	7537	2343	301	4.12969	31.0866	3.96764	Human papillomavirus type 75 E6, E7, E1, E2, E4, L2, and L1 genes	69984	Viruses	Cossaviricota	Papovaviricetes	Zurhausenvirales	Papillomaviridae	Betapapillomavirus	Betapapillomavirus 3	human papillomavirus 75	human papillomavirus 75	10065508	Run1	DNA	Human	10% to 50%
D-Atladra-Sept2	MF588699.1	7327	2513	285	4.1431	34.2978	3.86441	Gammapapillomavirus 7 isolate Gamma07_EV03c60, complete genome	1175849	Viruses	Cossaviricota	Papovaviricetes	Zurhausenvirales	Papillomaviridae	Gammapapillomavirus	Gammapapillomavirus 7	unclassified Gammapapillomavirus 7 subspecies/strain	unclassified Gammapapillomavirus 7 strain	10065508	Run1	DNA	Human	10% to 50%
D-Atladra-Sept2	JX429973.1	7329	2859	283	3.98426	39.0094	3.83624	Human papillomavirus type 156 isolate GC01, complete genome	1248396	Viruses	Cossaviricota	Papovaviricetes	Zurhausenvirales	Papillomaviridae	Gammapapillomavirus	Gammapapillomavirus 18	Human papillomavirus type 156	Human papillomavirus type 156	10065508	Run1	DNA	Human	10% to 50%
D-Atladra-Sept2	MF588704.1	7227	2638	276	4.04338	36.502	3.79416	Gammapapillomavirus 8 isolate Gamma08_do1c232, complete genome	1175850	Viruses	Cossaviricota	Papovaviricetes	Zurhausenvirales	Papillomaviridae	Gammapapillomavirus	Gammapapillomavirus 8	unclassified Gammapapillomavirus 8 subspecies/strain	unclassified Gammapapillomavirus 8 strain	10065508	Run1	DNA	Human	10% to 50%
D-Atladra-Sept2	MF588756.1	7230	2566	275	4.09025	35.491	3.77884	Gammapapillomavirus sp. isolate GammaiDysk6_wg1c05, complete genome	2049444	Viruses	Cossaviricota	Papovaviricetes	Zurhausenvirales	Papillomaviridae	Gammapapillomavirus	Gammapapillomavirus sp.	unclassified Gammapapillomavirus sp. subspecies/strain	unclassified Gammapapillomavirus sp. strain	10065508	Run1	DNA	Human	10% to 50%
D-Atladra-Sept2	KY242583.1	7399	3146	274	3.90164	42.5193	3.6791	Human papillomavirus type 209 isolate FA108, complete genome	1961924	Viruses	Cossaviricota	Papovaviricetes	Zurhausenvirales	Papillomaviridae	Betapapillomavirus	Betapapillomavirus 2	Human papillomavirus type 209	Human papillomavirus type 209	10065508	Run1	DNA	Human	10% to 50%
D-Atladra-Sept2	MF588763.1	3284	1090	119	4.05105	33.1912	3.60005	Gammapapillomavirus 9 isolate iGamma09_m090c71 E2 (E2), E4 (E4), and L2 (L2) genes, complete cds	1175851	Viruses	Cossaviricota	Papovaviricetes	Zurhausenvirales	Papillomaviridae	Gammapapillomavirus	Gammapapillomavirus 9	unclassified Gammapapillomavirus 9 subspecies/strain	unclassified Gammapapillomavirus 9 strain	10065508	Run1	DNA	Human	10% to 50%
D-Atladra-Sept2	MF588688.1	7257	2282	259	3.71549	31.4455	3.54574	Gammapapillomavirus sp. isolate Gamma_LCOSOc196, complete genome	2049444	Viruses	Cossaviricota	Papovaviricetes	Zurhausenvirales	Papillomaviridae	Gammapapillomavirus	Gammapapillomavirus sp.	unclassified Gammapapillomavirus sp. subspecies/strain	unclassified Gammapapillomavirus sp. strain	10065508	Run1	DNA	Human	10% to 50%
D-Atladra-Sept2	FN677756.1	7386	2100	256	3.25884	28.4322	3.44346	Human papillomavirus type 151, complete genome, isolate SIBX2	743812	Viruses	Cossaviricota	Papovaviricetes	Zurhausenvirales	Papillomaviridae	Betapapillomavirus	Betapapillomavirus 2	Human papillomavirus 151	Human papillomavirus 151	10065508	Run1	DNA	Human	10% to 50%
D-Atladra-Sept2	MF588722.1	7243	2153	241	3.60482	29.7253	3.3057	Gammapapillomavirus 13 isolate Gamma13_HIVGc158, complete genome	1513258	Viruses	Cossaviricota	Papovaviricetes	Zurhausenvirales	Papillomaviridae	Gammapapillomavirus	Gammapapillomavirus 13	unclassified Gammapapillomavirus 13 subspecies/strain	unclassified Gammapapillomavirus 13 strain	10065508	Run1	DNA	Human	10% to 50%
D-Atladra-Sept2	GU989205.1	5232	2060	174	3.62456	39.3731	3.30404	Trichodysplasia spinulosa-associated polyomavirus, complete genome	862909	Viruses	Cossaviricota	Papovaviricetes	Sepolyvirales	Polyomaviridae	Alphapolyomavirus	Alphapolyomavirus octihominis	Trichodysplasia spinulosa-associated polyomavirus	Trichodysplasia spinulosa-associated polyomavirus	10065508	Run1	DNA	Human	10% to 50%
D-Atladra-Sept2	X74464.1	7434	2489	246	4.48078	33.4813	3.28758	Human papillomavirus type 9 genomic DNA	10621	Viruses	Cossaviricota	Papovaviricetes	Zurhausenvirales	Papillomaviridae	Betapapillomavirus	Betapapillomavirus 2	Human papillomavirus 9	Human papillomavirus 9	10065508	Run1	DNA	Human	10% to 50%
D-Atladra-Sept2	U31778.1	7757	2188	242	3.30301	28.2068	3.09946	Human papillomavirus type 20, complete genome	31547	Viruses	Cossaviricota	Papovaviricetes	Zurhausenvirales	Papillomaviridae	Betapapillomavirus	Betapapillomavirus 1	human papillomavirus 20	human papillomavirus 20	10065508	Run1	DNA	Human	10% to 50%
D-Atladra-Sept2	MF588782.1	4152	1145	129	3.34008	27.5771	3.08672	Gammapapillomavirus 22 isolate iGamma22_m090c255 E7 (E7), E1 (E1), E2 (E2), and E4 (E4) genes, complete cds	1961679	Viruses	Cossaviricota	Papovaviricetes	Zurhausenvirales	Papillomaviridae	Gammapapillomavirus	Gammapapillomavirus 22	unclassified Gammapapillomavirus 22 subspecies/strain	unclassified Gammapapillomavirus 22 strain	10065508	Run1	DNA	Human	10% to 50%
D-Atladra-Sept2	JX413105.1	7252	2349	225	3.32202	32.3911	3.0824	Human papillomavirus type 169 isolate KC6, complete genome	1315260	Viruses	Cossaviricota	Papovaviricetes	Zurhausenvirales	Papillomaviridae	Gammapapillomavirus	Gammapapillomavirus 11	Human papillomavirus 169	Human papillomavirus 169	10065508	Run1	DNA	Human	10% to 50%
D-Atladra-Sept2	MF588775.1	6160	1957	190	3.28253	31.7695	3.06434	Gammapapillomavirus 18 isolate iGamma18_w24c02 E2 (E2), L2 (L2), and L1 (L1) genes, complete cds	1513263	Viruses	Cossaviricota	Papovaviricetes	Zurhausenvirales	Papillomaviridae	Gammapapillomavirus	Gammapapillomavirus 18	unclassified Gammapapillomavirus 18 subspecies/strain	unclassified Gammapapillomavirus 18 strain	10065508	Run1	DNA	Human	10% to 50%
D-Atladra-Sept2	X74466.1	7673	2637	236	3.12641	34.3673	3.0557	Human papillomavirus type 12 genomic DNA	10604	Viruses	Cossaviricota	Papovaviricetes	Zurhausenvirales	Papillomaviridae	Betapapillomavirus	Betapapillomavirus 1	human papillomavirus 12	human papillomavirus 12	10065508	Run1	DNA	Human	10% to 50%
D-Atladra-Sept2	MF588742.1	7214	2441	221	3.2047	33.837	3.04355	Gammapapillomavirus 22 isolate Gamma22_w20c08a, complete genome	1961679	Viruses	Cossaviricota	Papovaviricetes	Zurhausenvirales	Papillomaviridae	Gammapapillomavirus	Gammapapillomavirus 22	unclassified Gammapapillomavirus 22 subspecies/strain	unclassified Gammapapillomavirus 22 strain	10065508	Run1	DNA	Human	10% to 50%
D-Atladra-Sept2	KJ913662.1	7184	2150	196	2.73202	29.9276	2.71053	Human papillomavirus type 199 isolate KC82-SLO, complete genome	1545700	Viruses	Cossaviricota	Papovaviricetes	Zurhausenvirales	Papillomaviridae	Gammapapillomavirus	Gammapapillomavirus 12	Human papillomavirus 199	Human papillomavirus 199	10065508	Run1	DNA	Human	10% to 50%
D-Atladra-Sept2	KR816167.1	7226	1958	193	2.85302	27.0966	2.65353	Human papillomavirus type 176 isolate PLC295, complete genome	1851122	Viruses	Cossaviricota	Papovaviricetes	Zurhausenvirales	Papillomaviridae	Gammapapillomavirus	Gammapapillomavirus 8	Human papillomavirus type 176	Human papillomavirus type 176	10065508	Run1	DNA	Human	10% to 50%
D-Atladra-Sept2	KR816183.1	7500	1603	198	2.86844	21.3733	2.62282	Human papillomavirus type 196 isolate ACS058, complete genome	1851221	Viruses	Cossaviricota	Papovaviricetes	Zurhausenvirales	Papillomaviridae	Betapapillomavirus	Betapapillomavirus 1	Human papillomavirus type 196	Human papillomavirus type 196	10065508	Run1	DNA	Human	10% to 50%
D-Atladra-Sept2	GU117634.1	7309	1772	189	2.53667	24.2441	2.56902	Human papillomavirus type 134, complete genome	909333	Viruses	Cossaviricota	Papovaviricetes	Zurhausenvirales	Papillomaviridae	Gammapapillomavirus	Gammapapillomavirus 7	Human papillomavirus 134	Human papillomavirus 134	10065508	Run1	DNA	Human	10% to 50%
D-Atladra-Sept2	MF588724.1	7272	1736	186	2.65684	23.8724	2.54111	Gammapapillomavirus 15 isolate Gamma15_EV03c104, complete genome	1513260	Viruses	Cossaviricota	Papovaviricetes	Zurhausenvirales	Papillomaviridae	Gammapapillomavirus	Gammapapillomavirus 15	unclassified Gammapapillomavirus 15 subspecies/strain	unclassified Gammapapillomavirus 15 strain	10065508	Run1	DNA	Human	10% to 50%
D-Atladra-Sept2	FM955837.2	7466	2337	190	2.66717	31.3019	2.52831	Human papillomavirus type 98, complete genome	587347	Viruses	Cossaviricota	Papovaviricetes	Zurhausenvirales	Papillomaviridae	Betapapillomavirus	Betapapillomavirus 1	Human papillomavirus 98	Human papillomavirus 98	10065508	Run1	DNA	Human	10% to 50%
D-Atladra-Sept2	MF588719.1	7110	1808	173	2.61336	25.429	2.41736	Gammapapillomavirus 12 isolate Gamma12_w23c77, complete genome	1513257	Viruses	Cossaviricota	Papovaviricetes	Zurhausenvirales	Papillomaviridae	Gammapapillomavirus	Gammapapillomavirus 12	unclassified Gammapapillomavirus 12 subspecies/strain	unclassified Gammapapillomavirus 12 strain	10065508	Run1	DNA	Human	10% to 50%
D-Atladra-Sept2	AY443350.1	15690	1778	365	2.49048	11.3321	2.31118	Canine distemper virus isolate 00-2601, complete genome	11232	Viruses	Negarnaviricota	Monjiviricetes	Mononegavirales	Paramyxoviridae	Morbillivirus	Canine morbillivirus	unclassified Canine morbillivirus subspecies/strain	unclassified Canine morbillivirus strain	10065508	Run1	RNA	Animal	10% to 50%
D-Atladra-Sept2	NC_001802.1	9181	1172	209	2.42564	12.7655	2.26163	Human immunodeficiency virus 1, complete genome	11676	Viruses	Artverviricota	Revtraviricetes	Ortervirales	Retroviridae	Lentivirus	Human immunodeficiency virus 1	unclassified Human immunodeficiency virus 1 subspecies/strain	unclassified Human immunodeficiency virus 1 strain	10065508	Run1	RNA	Human	10% to 50%
D-Atladra-Sept2	AF083975.2	45063	10211	1025	2.3896	22.6594	2.25979	Fowl adenovirus 9, complete genome	172864	Viruses	Preplasmiviricota	Tectiliviricetes	Rowavirales	Adenoviridae	Aviadenovirus	Fowl aviadenovirus D	Fowl adenovirus 9	Fowl adenovirus 9	10065508	Run1	DNA	Animal	10% to 50%
D-Atladra-Sept2	KT698167.1	7298	1785	166	2.42655	24.4588	2.25979	Human papillomavirus 205, complete genome	2259334	Viruses	Cossaviricota	Papovaviricetes	Zurhausenvirales	Papillomaviridae	Gammapapillomavirus	Gammapapillomavirus 1	Human papillomavirus 205	Human papillomavirus 205	10065508	Run1	DNA	Human	10% to 50%
D-Atladra-Sept2	KT698168.1	7192	1133	161	2.43922	15.7536	2.22403	Human papillomavirus 158, complete genome	2259343	Viruses	Cossaviricota	Papovaviricetes	Zurhausenvirales	Papillomaviridae	Gammapapillomavirus	Gammapapillomavirus 12	Human papillomavirus 158	Human papillomavirus 158	10065508	Run1	DNA	Human	10% to 50%
D-Atladra-Sept2	KR816169.1	7240	1910	161	2.34245	26.3812	2.20928	Human papillomavirus 181 isolate ACS217, complete genome	1851124	Viruses	Cossaviricota	Papovaviricetes	Zurhausenvirales	Papillomaviridae	Gammapapillomavirus	Gammapapillomavirus 11	Human papillomavirus 181	Human papillomavirus 181	10065508	Run1	DNA	Human	10% to 50%
D-Atladra-Sept2	HM999987.1	7293	1231	160	2.36273	16.8792	2.17961	Human papillomavirus type 135 isolate NJ3500, complete genome	1070408	Viruses	Cossaviricota	Papovaviricetes	Zurhausenvirales	Papillomaviridae	Gammapapillomavirus	Gammapapillomavirus 15	Human papillomavirus 135	Human papillomavirus 135	10065508	Run1	DNA	Human	10% to 50%
D-Atladra-Sept2	X74467.1	7439	1848	163	2.17904	24.842	2.17689	Human papillomavirus type 14D genomic DNA	31546	Viruses	Cossaviricota	Papovaviricetes	Zurhausenvirales	Papillomaviridae	Betapapillomavirus	Betapapillomavirus 1	Human papillomavirus type 14D	Human papillomavirus type 14D	10065508	Run1	DNA	Human	10% to 50%
D-Atladra-Sept2	HM999989.1	7236	1632	156	1.98659	22.5539	2.14186	Human papillomavirus type 137 isolate NJ2801H, complete genome	1070410	Viruses	Cossaviricota	Papovaviricetes	Zurhausenvirales	Papillomaviridae	Gammapapillomavirus	Gammapapillomavirus 16	Human papillomavirus type 137	Human papillomavirus type 137	10065508	Run1	DNA	Human	10% to 50%
D-Atladra-Sept2	KC108721.1	7226	1451	148	2.09695	20.0803	2.03483	Human papillomavirus type 175 isolate SE87, complete genome	1434782	Viruses	Cossaviricota	Papovaviricetes	Zurhausenvirales	Papillomaviridae	Gammapapillomavirus	Gammapapillomavirus 23	Human papillomavirus 175	Human papillomavirus 175	10065508	Run1	DNA	Human	10% to 50%
D-Atladra-Sept2	MH460956.1	7134	1551	146	2.15879	21.741	2.03322	Human papillomavirus type 210 isolate FA10, complete genome	2320739	Viruses	Cossaviricota	Papovaviricetes	Zurhausenvirales	Papillomaviridae	Gammapapillomavirus	Gammapapillomavirus 12	Human papillomavirus type 210	Human papillomavirus type 210	10065508	Run1	DNA	Human	10% to 50%
D-Atladra-Sept2	HE963025.1	7443	1411	151	2.25134	18.9574	2.01555	Human papillomavirus type 159 complete genome, isolate SIBX8	1209820	Viruses	Cossaviricota	Papovaviricetes	Zurhausenvirales	Papillomaviridae	Betapapillomavirus	Betapapillomavirus 2	Human papillomavirus 159	Human papillomavirus 159	10065508	Run1	DNA	Human	10% to 50%
D-Atladra-Sept2	MF588758.1	7328	1671	147	2.14238	22.8029	1.99295	Gammapapillomavirus sp. isolate Gamma_w27c03a, complete genome	2049444	Viruses	Cossaviricota	Papovaviricetes	Zurhausenvirales	Papillomaviridae	Gammapapillomavirus	Gammapapillomavirus sp.	unclassified Gammapapillomavirus sp. subspecies/strain	unclassified Gammapapillomavirus sp. strain	10065508	Run1	DNA	Human	10% to 50%
D-Atladra-Sept2	GQ845445.1	7329	1605	147	1.99081	21.8993	1.99268	Human papillomavirus type 123, complete genome	765055	Viruses	Cossaviricota	Papovaviricetes	Zurhausenvirales	Papillomaviridae	Gammapapillomavirus	Gammapapillomavirus 7	Human papillomavirus 123	Human papillomavirus 123	10065508	Run1	DNA	Human	10% to 50%
D-Atladra-Sept2	KT698166.1	7154	1391	135	2.00129	19.4437	1.87477	Human papillomavirus 157, complete genome	2259331	Viruses	Cossaviricota	Papovaviricetes	Zurhausenvirales	Papillomaviridae	Gammapapillomavirus	Gammapapillomavirus 12	Human papillomavirus 157	Human papillomavirus 157	10065508	Run1	DNA	Human	10% to 50%
D-Atladra-Sept2	MF588730.1	7292	1971	134	1.97564	27.0296	1.82567	Gammapapillomavirus 18 isolate Gamma18_EV07c385, complete genome	1513263	Viruses	Cossaviricota	Papovaviricetes	Zurhausenvirales	Papillomaviridae	Gammapapillomavirus	Gammapapillomavirus 18	unclassified Gammapapillomavirus 18 subspecies/strain	unclassified Gammapapillomavirus 18 strain	10065508	Run1	DNA	Human	10% to 50%
D-Atladra-Sept2	MF588733.1	7282	1132	131	1.95401	15.5452	1.78725	Gammapapillomavirus 19 isolate Gamma19_w18c11d, complete genome	1513264	Viruses	Cossaviricota	Papovaviricetes	Zurhausenvirales	Papillomaviridae	Gammapapillomavirus	Gammapapillomavirus 19	unclassified Gammapapillomavirus 19 subspecies/strain	unclassified Gammapapillomavirus 19 strain	10065508	Run1	DNA	Human	10% to 50%
D-Atladra-Sept2	FM955838.1	7698	1684	135	1.7598	21.8758	1.74229	Human papillomavirus type 99, complete genome	587348	Viruses	Cossaviricota	Papovaviricetes	Zurhausenvirales	Papillomaviridae	Betapapillomavirus	Betapapillomavirus 1	Human papillomavirus 99	Human papillomavirus 99	10065508	Run1	DNA	Human	10% to 50%
D-Atladra-Sept2	MF588687.1	7415	1513	130	1.90874	20.4046	1.74179	Betapapillomavirus 5 isolate Beta05_EV03c09, complete genome	334209	Viruses	Cossaviricota	Papovaviricetes	Zurhausenvirales	Papillomaviridae	Betapapillomavirus	Betapapillomavirus 5	unclassified Betapapillomavirus 5 subspecies/strain	unclassified Betapapillomavirus 5 strain	10065508	Run1	DNA	Human	10% to 50%
D-Atladra-Sept2	GU117633.1	7358	1914	129	1.80563	26.0125	1.74178	Human papillomavirus type 133, complete genome	909332	Viruses	Cossaviricota	Papovaviricetes	Zurhausenvirales	Papillomaviridae	Gammapapillomavirus	Gammapapillomavirus 10	Human papillomavirus 133	Human papillomavirus 133	10065508	Run1	DNA	Human	10% to 50%
D-Atladra-Sept2	JX444073.1	7143	1164	124	1.86915	16.2957	1.72467	Human papillomavirus KC5, complete genome	1647924	Viruses	Cossaviricota	Papovaviricetes	Zurhausenvirales	Papillomaviridae	Gammapapillomavirus	Human papillomavirus KC5	unclassified Human papillomavirus KC5 subspecies/strain	unclassified Human papillomavirus KC5 strain	10065508	Run1	DNA	Human	10% to 50%
D-Atladra-Sept2	KR816174.1	7268	1064	126	1.81708	14.6395	1.72234	Human papillomavirus 187 isolate ACS447, complete genome	1851130	Viruses	Cossaviricota	Papovaviricetes	Zurhausenvirales	Papillomaviridae	Gammapapillomavirus	Gammapapillomavirus 26	Human papillomavirus 187	Human papillomavirus 187	10065508	Run1	DNA	Human	10% to 50%
D-Atladra-Sept2	JX444072.1	7129	1533	122	1.78134	21.5037	1.70018	Human papillomavirus type 165 isolate KC7, complete genome	1315266	Viruses	Cossaviricota	Papovaviricetes	Zurhausenvirales	Papillomaviridae	Gammapapillomavirus	Gammapapillomavirus 12	Human papillomavirus 165	Human papillomavirus 165	10065508	Run1	DNA	Human	10% to 50%
D-Atladra-Sept2	MF588693.1	7226	1247	119	1.67496	17.2571	1.63611	Gammapapillomavirus sp. isolate Gamma_w34c04a, complete genome	2049444	Viruses	Cossaviricota	Papovaviricetes	Zurhausenvirales	Papillomaviridae	Gammapapillomavirus	Gammapapillomavirus sp.	unclassified Gammapapillomavirus sp. subspecies/strain	unclassified Gammapapillomavirus sp. strain	10065508	Run1	DNA	Human	10% to 50%
D-Atladra-Sept2	MF588754.1	7270	1414	116	1.73778	19.4498	1.58521	Gammapapillomavirus sp. isolate Gammai915_ga2c70, complete genome	2049444	Viruses	Cossaviricota	Papovaviricetes	Zurhausenvirales	Papillomaviridae	Gammapapillomavirus	Gammapapillomavirus sp.	unclassified Gammapapillomavirus sp. subspecies/strain	unclassified Gammapapillomavirus sp. strain	10065508	Run1	DNA	Human	10% to 50%
D-Atladra-Sept2	MF588746.1	7300	1943	116	1.63329	26.6164	1.5787	Gammapapillomavirus 24 isolate Gamma24_EV03c40, complete genome	1961681	Viruses	Cossaviricota	Papovaviricetes	Zurhausenvirales	Papillomaviridae	Gammapapillomavirus	Gammapapillomavirus 24	unclassified Gammapapillomavirus 24 subspecies/strain	unclassified Gammapapillomavirus 24 strain	10065508	Run1	DNA	Human	10% to 50%
D-Atladra-Sept2	MF588737.1	7285	1647	112	1.64583	22.6081	1.5274	Gammapapillomavirus 22 isolate Gamma22_m090c145, complete genome	1961679	Viruses	Cossaviricota	Papovaviricetes	Zurhausenvirales	Papillomaviridae	Gammapapillomavirus	Gammapapillomavirus 22	unclassified Gammapapillomavirus 22 subspecies/strain	unclassified Gammapapillomavirus 22 strain	10065508	Run1	DNA	Human	10% to 50%
D-Atladra-Sept2	MF588723.1	7159	1212	110	1.6767	16.9297	1.52653	Gammapapillomavirus 14 isolate Gamma14_EV07c382, complete genome	1513259	Viruses	Cossaviricota	Papovaviricetes	Zurhausenvirales	Papillomaviridae	Gammapapillomavirus	Gammapapillomavirus 14	unclassified Gammapapillomavirus 14 subspecies/strain	unclassified Gammapapillomavirus 14 strain	10065508	Run1	DNA	Human	10% to 50%
D-Atladra-Sept2	GU233853.1	7219	1473	109	1.60207	20.4045	1.50008	Human papillomavirus type 129, complete genome	931210	Viruses	Cossaviricota	Papovaviricetes	Zurhausenvirales	Papillomaviridae	Gammapapillomavirus	Gammapapillomavirus 9	Human papillomavirus type 129	Human papillomavirus type 129	10065508	Run1	DNA	Human	10% to 50%
D-Atladra-Sept2	U31785.1	7722	1458	115	1.54134	18.8811	1.47956	Human papillomavirus type 36, complete genome	37957	Viruses	Cossaviricota	Papovaviricetes	Zurhausenvirales	Papillomaviridae	Betapapillomavirus	Betapapillomavirus 1	human papillomavirus 36	human papillomavirus 36	10065508	Run1	DNA	Human	10% to 50%
D-Atladra-Sept2	HM999994.1	7374	1225	109	1.58098	16.6124	1.46855	Human papillomavirus type 142 isolate GH1302, complete genome	1070415	Viruses	Cossaviricota	Papovaviricetes	Zurhausenvirales	Papillomaviridae	Gammapapillomavirus	Gammapapillomavirus 10	Human papillomavirus 142	Human papillomavirus 142	10065508	Run1	DNA	Human	10% to 50%
D-Atladra-Sept2	MF588732.1	7289	1263	106	1.57683	17.3275	1.44478	Gammapapillomavirus 19 isolate Gamma19_TVMBSGc2450, complete genome	1513264	Viruses	Cossaviricota	Papovaviricetes	Zurhausenvirales	Papillomaviridae	Gammapapillomavirus	Gammapapillomavirus 19	unclassified Gammapapillomavirus 19 subspecies/strain	unclassified Gammapapillomavirus 19 strain	10065508	Run1	DNA	Human	10% to 50%
D-Atladra-Sept2	JX413109.1	7238	1726	104	1.43778	23.8464	1.42751	Human papillomavirus type 161 isolate KC1, complete genome	1315264	Viruses	Cossaviricota	Papovaviricetes	Zurhausenvirales	Papillomaviridae	Gammapapillomavirus	Gammapapillomavirus 19	Human papillomavirus type 161	Human papillomavirus type 161	10065508	Run1	DNA	Human	10% to 50%
D-Atladra-Sept2	M20219.1	7937	1521	112	1.51432	19.1634	1.40193	Bovine papillomavirus type 2, complete genome	2758382	Viruses	Cossaviricota	Papovaviricetes	Zurhausenvirales	Papillomaviridae	Deltapapillomavirus	Deltapapillomavirus 4	Bos taurus papillomavirus 2	Bos taurus papillomavirus 2	10065508	Run1	DNA	Animal	10% to 50%
D-Atladra-Sept2	MF588725.1	7262	1361	97	1.4356	18.7414	1.32703	Gammapapillomavirus 15 isolate Gamma15_w18c134, complete genome	1513260	Viruses	Cossaviricota	Papovaviricetes	Zurhausenvirales	Papillomaviridae	Gammapapillomavirus	Gammapapillomavirus 15	unclassified Gammapapillomavirus 15 subspecies/strain	unclassified Gammapapillomavirus 15 strain	10065508	Run1	DNA	Human	10% to 50%
D-Atladra-Sept2	MF588718.1	7142	1270	93	1.29419	17.7821	1.29368	Gammapapillomavirus 12 isolate Gamma12_w11c13, complete genome	1513257	Viruses	Cossaviricota	Papovaviricetes	Zurhausenvirales	Papillomaviridae	Gammapapillomavirus	Gammapapillomavirus 12	unclassified Gammapapillomavirus 12 subspecies/strain	unclassified Gammapapillomavirus 12 strain	10065508	Run1	DNA	Human	10% to 50%
D-Atladra-Sept2	MF588751.1	7324	1213	95	1.31781	16.562	1.28866	Gammapapillomavirus 24 isolate Gamma24_w34c28a, complete genome	1961681	Viruses	Cossaviricota	Papovaviricetes	Zurhausenvirales	Papillomaviridae	Gammapapillomavirus	Gammapapillomavirus 24	unclassified Gammapapillomavirus 24 subspecies/strain	unclassified Gammapapillomavirus 24 strain	10065508	Run1	DNA	Human	10% to 50%
D-Atladra-Sept2	GQ845446.1	7489	1133	91	1.30931	15.1289	1.20721	Human papillomavirus type 124, complete genome	765056	Viruses	Cossaviricota	Papovaviricetes	Zurhausenvirales	Papillomaviridae	Betapapillomavirus	Betapapillomavirus 1	human papillomavirus 124	human papillomavirus 124	10065508	Run1	DNA	Human	10% to 50%
D-Atladra-Sept2	GQ845441.1	7251	1064	88	1.27503	14.6738	1.20573	Human papillomavirus type 119, complete genome	765051	Viruses	Cossaviricota	Papovaviricetes	Zurhausenvirales	Papillomaviridae	Gammapapillomavirus	Gammapapillomavirus 8	human papillomavirus 119	human papillomavirus 119	10065508	Run1	DNA	Human	10% to 50%
D-Atladra-Sept2	KU248828.1	7262	1392	88	1.32199	19.1683	1.2039	Papillomavirus JL74, complete genome	1846251	Viruses	Cossaviricota	Papovaviricetes	Zurhausenvirales	Papillomaviridae	Gammapapillomavirus	Gammapapillomavirus 13	Papillomavirus JL74	Papillomavirus JL74	10065508	Run1	DNA	Animal	10% to 50%
D-Atladra-Sept2	KC862318.1	7228	1171	85	1.26123	16.2009	1.16833	Human papillomavirus type 167 isolate KC10, complete genome	1420545	Viruses	Cossaviricota	Papovaviricetes	Zurhausenvirales	Papillomaviridae	Gammapapillomavirus	Gammapapillomavirus 21	Human papillomavirus 167	Human papillomavirus 167	10065508	Run1	DNA	Human	10% to 50%
D-Atladra-Sept2	KP692116.1	7344	1159	86	1.21991	15.7816	1.1634	Human papillomavirus type 202 isolate HPV202, complete genome	1682341	Viruses	Cossaviricota	Papovaviricetes	Zurhausenvirales	Papillomaviridae	Gammapapillomavirus	Gammapapillomavirus 11	Human papillomavirus 202	Human papillomavirus 202	10065508	Run1	DNA	Human	10% to 50%
D-Atladra-Sept2	KT862807.1	43337	5447	496	1.16216	12.5689	1.13707	Fowl aviadenovirus 3 strain SR49, complete genome	172860	Viruses	Preplasmiviricota	Tectiliviricetes	Rowavirales	Adenoviridae	Aviadenovirus	Fowl aviadenovirus D	Fowl aviadenovirus 3	Fowl aviadenovirus 3	10065508	Run1	DNA	Animal	10% to 50%
D-Atladra-Sept2	MF588755.1	7282	1139	80	1.13068	15.6413	1.09145	Gammapapillomavirus sp. isolate GammaiCH2_EV03c434, complete genome	2049444	Viruses	Cossaviricota	Papovaviricetes	Zurhausenvirales	Papillomaviridae	Gammapapillomavirus	Gammapapillomavirus sp.	unclassified Gammapapillomavirus sp. subspecies/strain	unclassified Gammapapillomavirus sp. strain	10065508	Run1	DNA	Human	10% to 50%
D-Atladra-Sept2	MF588705.1	7298	1303	80	1.17837	17.8542	1.08906	Gammapapillomavirus 8 isolate Gamma08_EV07c390, complete genome	1175850	Viruses	Cossaviricota	Papovaviricetes	Zurhausenvirales	Papillomaviridae	Gammapapillomavirus	Gammapapillomavirus 8	unclassified Gammapapillomavirus 8 subspecies/strain	unclassified Gammapapillomavirus 8 strain	10065508	Run1	DNA	Human	10% to 50%
D-Atladra-Sept2	HM049560.1	35203	2077	381	1.13037	5.90007	1.07525	Murine adenovirus 2 isolate K87, complete genome	931972	Viruses	Preplasmiviricota	Tectiliviricetes	Rowavirales	Adenoviridae	Mastadenovirus	Murine mastadenovirus B	Murine adenovirus 2	Murine adenovirus 2	10065508	Run1	DNA	Animal	LESS
D-Atladra-Sept2	MF588744.1	7209	1096	75	1.13019	15.2032	1.0336	Gammapapillomavirus 23 isolate Gamma23_ga2c01, complete genome	1961680	Viruses	Cossaviricota	Papovaviricetes	Zurhausenvirales	Papillomaviridae	Gammapapillomavirus	Gammapapillomavirus 23	unclassified Gammapapillomavirus 23 subspecies/strain	unclassified Gammapapillomavirus 23 strain	10065508	Run1	DNA	Human	10% to 50%
D-Atladra-Sept2	HM999998.1	7265	1513	74	1.08236	20.8259	1.01195	Human papillomavirus type 146 isolate GH1677, complete genome	1070419	Viruses	Cossaviricota	Papovaviricetes	Zurhausenvirales	Papillomaviridae	Gammapapillomavirus	Gammapapillomavirus 15	Human papillomavirus 146	Human papillomavirus 146	10065508	Run1	DNA	Human	10% to 50%
D-Atladra-Sept2	MF588710.1	7289	1245	71	0.999019	17.0805	0.967731	Gammapapillomavirus 9 isolate Gamma09_w11C39, complete genome	1175851	Viruses	Cossaviricota	Papovaviricetes	Zurhausenvirales	Papillomaviridae	Gammapapillomavirus	Gammapapillomavirus 9	unclassified Gammapapillomavirus 9 subspecies/strain	unclassified Gammapapillomavirus 9 strain	10065508	Run1	DNA	Human	10% to 50%
D-Atladra-Sept2	BD269513.1	34185	3204	314	0.957867	9.37253	0.912554	Recombinant adenovirus and mutant adenovirus induced from bovine adenovirus type 1	10546	Viruses	Preplasmiviricota	Tectiliviricetes	Rowavirales	Adenoviridae	Mastadenovirus	Bovine mastadenovirus A	Bovine adenovirus 1	Bovine adenovirus 1	10065508	Run1	DNA	Animal	LESS
D-Atladra-Sept2	AY382778.1	7450	1139	54	0.78726	15.2886	0.720115	Human papillomavirus type 93, complete genome	247268	Viruses	Cossaviricota	Papovaviricetes	Zurhausenvirales	Papillomaviridae	Betapapillomavirus	Betapapillomavirus 1	Human papillomavirus 93	Human papillomavirus 93	10065508	Run1	DNA	Human	10% to 50%
D-Atladra-Sept2	NC_009334.1	172764	6933	710	0.430573	4.01299	0.408291	Human herpesvirus 4, complete genome	12509	Viruses	Peploviricota	Herviviricetes	Herpesvirales	Herpesviridae	Lymphocryptovirus	Human gammaherpesvirus 4	Human herpesvirus 4 type 2	Human herpesvirus 4 type 2	10065508	Run1	DNA	Human	LESS
D-Atladra-Sept2	MG712775.1	44454	1433	155	0.360622	3.22356	0.346406	Fowl adenovirus 8b isolate SD1356, complete genome	586029	Viruses	Preplasmiviricota	Tectiliviricetes	Rowavirales	Adenoviridae	Aviadenovirus	Fowl aviadenovirus E	Fowl adenovirus 8b	Fowl adenovirus 8b	10065508	Run1	DNA	Animal	LESS
D-Atladra-Sept2	NC_007653.1	156487	1187	487	0.700973	0.758529	0.309183	Papiine herpesvirus 2, complete genome	340907	Viruses	Peploviricota	Herviviricetes	Herpesvirales	Herpesviridae	Simplexvirus	Papiine alphaherpesvirus 2	unclassified Papiine alphaherpesvirus 2 subspecies/strain	unclassified Papiine alphaherpesvirus 2 strain	10065508	Run1	DNA	Animal	LESS
D-Atladra-Sept2	KF360047.1	34163	1072	83	0.211096	3.1379	0.241372	UNVERIFIED: Simian adenovirus ch1 isolate SAdV-ch1 genomic sequence	1509400	Viruses	Preplasmiviricota	Tectiliviricetes	Rowavirales	Adenoviridae	Mastadenovirus	Human mastadenovirus A	Simian adenovirus ch1	Simian adenovirus ch1	10065508	Run1	DNA	Animal	LESS
D-Atladra-Sept2	NC_001716.2	153080	2984	288	0.194932	1.94931	0.186912	Human herpesvirus 7, complete genome	10372	Viruses	Peploviricota	Herviviricetes	Herpesvirales	Herpesviridae	Roseolovirus	Human betaherpesvirus 7	unclassified Human betaherpesvirus 7 subspecies/strain	unclassified Human betaherpesvirus 7 strain	10065508	Run1	DNA	Human	LESS
D-Chhani-Sept1	J02226.1	5130	5090	82240	1711.39	99.2203	3185.76	JC virus complete genome	10632	Viruses	Cossaviricota	Papovaviricetes	Sepolyvirales	Polyomaviridae	Betapolyomavirus	Betapolyomavirus secuhominis	JC polyomavirus	JC polyomavirus	5032138	Run1	DNA	Human	Over 90%
D-Chhani-Sept1	KY316160.1	34169	33950	109931	332.37	99.3591	639.345	Human adenovirus 41 isolate SH/2015/D16, complete genome	10524	Viruses	Preplasmiviricota	Tectiliviricetes	Rowavirales	Adenoviridae	Mastadenovirus	Human mastadenovirus F	Human adenovirus 41	Human adenovirus 41	5032138	Run1	DNA	Human	Over 90%
D-Chhani-Sept1	L19443.1	34214	34175	107790	326.369	99.886	626.069	Human adenovirus F, complete genome	130309	Viruses	Preplasmiviricota	Tectiliviricetes	Rowavirales	Adenoviridae	Mastadenovirus	Human mastadenovirus F	unclassified Human mastadenovirus F subspecies/strain	unclassified Human mastadenovirus F strain	5032138	Run1	DNA	Human	Over 90%
D-Chhani-Sept1	MF118167.1	3925	2269	8675	231.981	57.8089	439.215	Human fecal virus Jorvi2, complete genome	2017081	Viruses	Cressdnaviricota	Arfiviricetes	Cirlivirales	Circoviridae	unclassified Circoviridae genus	Human fecal virus Jorvi2	unclassified Human fecal virus Jorvi2 subspecies/strain	unclassified Human fecal virus Jorvi2 strain	5032138	Run1	DNA	Human	50% to 90%
D-Chhani-Sept1	NC_012564.1	5242	3503	7584	148.323	66.8256	287.507	Human bocavirus 3, complete genome	638313	Viruses	Cossaviricota	Quintoviricetes	Piccovirales	Parvoviridae	Bocaparvovirus	Primate bocaparvovirus 1	Human bocavirus 3	Human bocavirus 3	5032138	Run1	DNA	Human	50% to 90%
D-Chhani-Sept1	AF043303.1	4679	4631	5219	118.561	98.9741	221.657	Adeno-associated virus 2, complete genome	10804	Viruses	Cossaviricota	Quintoviricetes	Piccovirales	Parvoviridae	Dependoparvovirus	Adeno-associated dependoparvovirus A	adeno-associated virus 2	adeno-associated virus 2	5032138	Run1	DNA	Human	Over 90%
D-Chhani-Sept1	FJ973560.1	4958	2984	4929	99.6063	60.1856	197.56	Human bocavirus 2b NI strain HBoV2B-NI-213, complete genome	1511881	Viruses	Cossaviricota	Quintoviricetes	Piccovirales	Parvoviridae	Bocaparvovirus	Primate bocaparvovirus 2	Human bocavirus 2b NI	Human bocavirus 2b NI	5032138	Run1	DNA	Human	50% to 90%
D-Chhani-Sept1	NC_012042.1	5196	3102	2363	43.9528	59.6998	90.3737	Human bocavirus 2c PK isolate PK-5510, complete genome	1511882	Viruses	Cossaviricota	Quintoviricetes	Piccovirales	Parvoviridae	Bocaparvovirus	Primate bocaparvovirus 2	Human bocavirus 2c PK	Human bocavirus 2c PK	5032138	Run1	DNA	Human	50% to 90%
D-Chhani-Sept1	V01108.1	5153	4634	1847	37.4739	89.9282	71.2286	Human BK virus (strain Dunlop) genome. (Closely related to SV40.)	1891762	Viruses	Cossaviricota	Papovaviricetes	Sepolyvirales	Polyomaviridae	Betapolyomavirus	Betapolyomavirus hominis	unclassified Betapolyomavirus hominis subspecies/strain	unclassified Betapolyomavirus hominis strain	5032138	Run1	DNA	Human	50% to 90%
D-Chhani-Sept1	NC_001356.1	7815	6605	1744	22.9228	84.517	44.3471	Human papillomavirus - 1, complete genome	334203	Viruses	Cossaviricota	Papovaviricetes	Zurhausenvirales	Papillomaviridae	Mupapillomavirus	Mupapillomavirus 1	unclassified Mupapillomavirus 1 subspecies/strain	unclassified Mupapillomavirus 1 strain	5032138	Run1	DNA	Human	50% to 90%
D-Chhani-Sept1	X70828.1	7348	5619	1168	16.4835	76.4698	31.5879	Human papillomavirus type 63 complete genome	28311	Viruses	Cossaviricota	Papovaviricetes	Zurhausenvirales	Papillomaviridae	Mupapillomavirus	Mupapillomavirus 2	Human papillomavirus type 63	Human papillomavirus type 63	5032138	Run1	DNA	Human	50% to 90%
D-Chhani-Sept1	X70829.1	7308	4714	1007	14.1039	64.5047	27.3828	Human papillomavirus type 65 complete genome	28312	Viruses	Cossaviricota	Papovaviricetes	Zurhausenvirales	Papillomaviridae	Gammapapillomavirus	Gammapapillomavirus 1	Human papillomavirus 65	Human papillomavirus 65	5032138	Run1	DNA	Human	50% to 90%
D-Chhani-Sept1	X01457.1	5176	1743	490	10.1578	33.6747	18.8126	Parvovirus h-1, complete genome	10799	Viruses	Cossaviricota	Quintoviricetes	Piccovirales	Parvoviridae	Protoparvovirus	Rodent protoparvovirus 1	H-1 parvovirus	H-1 parvovirus	5032138	Run1	DNA	Human	10% to 50%
D-Chhani-Sept1	JQ326209.1	35153	16690	2791	8.2928	47.4782	15.7777	Human adenovirus 19, complete genome	28278	Viruses	Preplasmiviricota	Tectiliviricetes	Rowavirales	Adenoviridae	Mastadenovirus	Human mastadenovirus D	Human adenovirus 19	Human adenovirus 19	5032138	Run1	DNA	Human	10% to 50%
D-Chhani-Sept1	EU233812.1	4139	1936	285	7.26322	46.7746	13.6835	Anopheles gambiae densonucleosis virus, complete genome	487311	Viruses	Cossaviricota	Quintoviricetes	Piccovirales	Parvoviridae	Brevihamaparvovirus	Dipteran brevihamaparvovirus 1	Anopheles gambiae densovirus	Anopheles gambiae densovirus	5032138	Run1	DNA	Insect	10% to 50%
D-Chhani-Sept1	NC_001802.1	9181	2383	596	6.89968	25.9558	12.9004	Human immunodeficiency virus 1, complete genome	11676	Viruses	Artverviricota	Revtraviricetes	Ortervirales	Retroviridae	Lentivirus	Human immunodeficiency virus 1	unclassified Human immunodeficiency virus 1 subspecies/strain	unclassified Human immunodeficiency virus 1 strain	5032138	Run1	RNA	Human	10% to 50%
D-Chhani-Sept1	AY461507.1	6034	1668	381	6.49898	27.6434	12.5478	Mythimna loreyi densovirus, complete genome	185636	Viruses	Cossaviricota	Quintoviricetes	Piccovirales	Parvoviridae	Ambidensovirus	Lepidopteran ambidensovirus 1	Mythimna loreyi densovirus	Mythimna loreyi densovirus	5032138	Run1	DNA	Insect	10% to 50%
D-Chhani-Sept1	GQ845444.1	7397	2979	421	6.06913	40.2731	11.3103	Human papillomavirus type 122, complete genome	765054	Viruses	Cossaviricota	Papovaviricetes	Zurhausenvirales	Papillomaviridae	Betapapillomavirus	Betapapillomavirus 2	Human papillomavirus 122	Human papillomavirus 122	5032138	Run1	DNA	Human	10% to 50%
D-Chhani-Sept1	JX262162.1	4939	2396	278	5.92671	48.5118	11.1854	Human polyomavirus 10 isolate 10ww, complete genome	1208309	Viruses	Cossaviricota	Papovaviricetes	Sepolyvirales	Polyomaviridae	Deltapolyomavirus	Deltapolyomavirus decihominis	unclassified Deltapolyomavirus decihominis subspecies/strain	unclassified Deltapolyomavirus decihominis strain	5032138	Run1	DNA	Human	10% to 50%
D-Chhani-Sept1	AF108105.1	35100	13600	1949	5.81991	38.7464	11.0345	Human adenovirus type 17 complete genome	46922	Viruses	Preplasmiviricota	Tectiliviricetes	Rowavirales	Adenoviridae	Mastadenovirus	Human mastadenovirus D	Human adenovirus 17	Human adenovirus 17	5032138	Run1	DNA	Human	10% to 50%
D-Chhani-Sept1	Y15176.1	7427	2924	366	5.1928	39.3699	9.79299	Human papillomavirus type 80 E6, E7, E1, E2, E4, L2, and L1 genes	69987	Viruses	Cossaviricota	Papovaviricetes	Zurhausenvirales	Papillomaviridae	Betapapillomavirus	Betapapillomavirus 2	Human papillomavirus 80	Human papillomavirus 80	5032138	Run1	DNA	Human	10% to 50%
D-Chhani-Sept1	MF588724.1	7272	1846	255	3.66681	25.385	6.96841	Gammapapillomavirus 15 isolate Gamma15_EV03c104, complete genome	1513260	Viruses	Cossaviricota	Papovaviricetes	Zurhausenvirales	Papillomaviridae	Gammapapillomavirus	Gammapapillomavirus 15	unclassified Gammapapillomavirus 15 subspecies/strain	unclassified Gammapapillomavirus 15 strain	5032138	Run1	DNA	Human	10% to 50%
D-Chhani-Sept1	MF588693.1	7226	2339	241	3.56275	32.3692	6.62776	Gammapapillomavirus sp. isolate Gamma_w34c04a, complete genome	2049444	Viruses	Cossaviricota	Papovaviricetes	Zurhausenvirales	Papillomaviridae	Gammapapillomavirus	Gammapapillomavirus sp.	unclassified Gammapapillomavirus sp. subspecies/strain	unclassified Gammapapillomavirus sp. strain	5032138	Run1	DNA	Human	10% to 50%
D-Chhani-Sept1	MF588756.1	7230	1758	240	3.54774	24.3154	6.5966	Gammapapillomavirus sp. isolate GammaiDysk6_wg1c05, complete genome	2049444	Viruses	Cossaviricota	Papovaviricetes	Zurhausenvirales	Papillomaviridae	Gammapapillomavirus	Gammapapillomavirus sp.	unclassified Gammapapillomavirus sp. subspecies/strain	unclassified Gammapapillomavirus sp. strain	5032138	Run1	DNA	Human	10% to 50%
D-Chhani-Sept1	FM955842.1	7412	1888	240	5.38488	25.4722	6.43463	Human papillomavirus type 113, complete genome	587351	Viruses	Cossaviricota	Papovaviricetes	Zurhausenvirales	Papillomaviridae	Betapapillomavirus	Betapapillomavirus 2	Human papillomavirus 113	Human papillomavirus 113	5032138	Run1	DNA	Human	10% to 50%
D-Chhani-Sept1	MH355567.1	35217	6331	907	2.6876	17.9771	5.11802	Human adenovirus 7 strain BJ/CHN/2018, complete genome	10519	Viruses	Preplasmiviricota	Tectiliviricetes	Rowavirales	Adenoviridae	Mastadenovirus	Human mastadenovirus B	Human adenovirus 7	Human adenovirus 7	5032138	Run1	DNA	Human	10% to 50%
D-Chhani-Sept1	NC_012729.2	5104	1157	126	1.61304	22.6685	4.90577	Human bocavirus 4 NI strain HBoV4-NI-385, complete genome	1511883	Viruses	Cossaviricota	Quintoviricetes	Piccovirales	Parvoviridae	Bocaparvovirus	Primate bocaparvovirus 2	Human bocavirus 4 NI	Human bocavirus 4 NI	5032138	Run1	DNA	Human	10% to 50%
D-Chhani-Sept1	MF588704.1	7227	1670	159	2.29532	23.1078	4.37206	Gammapapillomavirus 8 isolate Gamma08_do1c232, complete genome	1175850	Viruses	Cossaviricota	Papovaviricetes	Zurhausenvirales	Papillomaviridae	Gammapapillomavirus	Gammapapillomavirus 8	unclassified Gammapapillomavirus 8 subspecies/strain	unclassified Gammapapillomavirus 8 strain	5032138	Run1	DNA	Human	10% to 50%
D-Chhani-Sept1	MF588725.1	7262	1255	158	2.27193	17.2817	4.32363	Gammapapillomavirus 15 isolate Gamma15_w18c134, complete genome	1513260	Viruses	Cossaviricota	Papovaviricetes	Zurhausenvirales	Papillomaviridae	Gammapapillomavirus	Gammapapillomavirus 15	unclassified Gammapapillomavirus 15 subspecies/strain	unclassified Gammapapillomavirus 15 strain	5032138	Run1	DNA	Human	10% to 50%
D-Chhani-Sept1	HE963025.1	7443	1668	137	2.16386	22.4103	3.6578	Human papillomavirus type 159 complete genome, isolate SIBX8	1209820	Viruses	Cossaviricota	Papovaviricetes	Zurhausenvirales	Papillomaviridae	Betapapillomavirus	Betapapillomavirus 2	Human papillomavirus 159	Human papillomavirus 159	5032138	Run1	DNA	Human	10% to 50%
D-Chhani-Sept1	KC862318.1	7228	1185	115	1.66276	16.3946	3.16175	Human papillomavirus type 167 isolate KC10, complete genome	1420545	Viruses	Cossaviricota	Papovaviricetes	Zurhausenvirales	Papillomaviridae	Gammapapillomavirus	Gammapapillomavirus 21	Human papillomavirus 167	Human papillomavirus 167	5032138	Run1	DNA	Human	10% to 50%
D-Chhani-Sept1	KX868289.2	33676	5007	523	1.61836	14.8682	3.08623	Human adenovirus 12 isolate GyK010, complete genome	28282	Viruses	Preplasmiviricota	Tectiliviricetes	Rowavirales	Adenoviridae	Mastadenovirus	Human mastadenovirus A	Human adenovirus 12	Human adenovirus 12	5032138	Run1	DNA	Human	10% to 50%
D-Chhani-Sept1	EU410349.1	7384	1073	110	1.56704	14.5314	2.96039	Human papillomavirus type 111, complete genome	518630	Viruses	Cossaviricota	Papovaviricetes	Zurhausenvirales	Papillomaviridae	Betapapillomavirus	Betapapillomavirus 2	Human papillomavirus 111	Human papillomavirus 111	5032138	Run1	DNA	Human	10% to 50%
D-Chhani-Sept1	MF588737.1	7285	1179	88	1.23013	16.1839	2.40049	Gammapapillomavirus 22 isolate Gamma22_m090c145, complete genome	1961679	Viruses	Cossaviricota	Papovaviricetes	Zurhausenvirales	Papillomaviridae	Gammapapillomavirus	Gammapapillomavirus 22	unclassified Gammapapillomavirus 22 subspecies/strain	unclassified Gammapapillomavirus 22 strain	5032138	Run1	DNA	Human	10% to 50%
D-Chhani-Sept1	AC_000008.1	35938	2371	393	1.14396	6.59747	2.17313	Human adenovirus 5, complete genome	28285	Viruses	Preplasmiviricota	Tectiliviricetes	Rowavirales	Adenoviridae	Mastadenovirus	Human mastadenovirus C	Human adenovirus 5	Human adenovirus 5	5032138	Run1	DNA	Human	LESS
D-Chhani-Sept1	AM749299.1	33763	2807	355	1.08806	8.31383	2.08946	Human adenovirus type 31 complete genome, serotype 31	10529	Viruses	Preplasmiviricota	Tectiliviricetes	Rowavirales	Adenoviridae	Mastadenovirus	Human mastadenovirus A	Human adenovirus 31	Human adenovirus 31	5032138	Run1	DNA	Human	LESS
D-Chhani-Sept1	JN860680.1	35384	3566	349	1.03148	10.078	1.96004	Human adenovirus 16 strain E26, complete genome	31544	Viruses	Preplasmiviricota	Tectiliviricetes	Rowavirales	Adenoviridae	Mastadenovirus	Human mastadenovirus B	Human adenovirus 16	Human adenovirus 16	5032138	Run1	DNA	Human	10% to 50%
D-Chhani-Sept1	HM049560.1	35203	1625	264	0.793712	4.61608	1.49029	Murine adenovirus 2 isolate K87, complete genome	931972	Viruses	Preplasmiviricota	Tectiliviricetes	Rowavirales	Adenoviridae	Mastadenovirus	Murine mastadenovirus B	Murine adenovirus 2	Murine adenovirus 2	5032138	Run1	DNA	Animal	LESS
D-Chhani-Sept1	NC_045512.2	29903	1468	206	0.720331	4.90921	1.36899	Severe acute respiratory syndrome coronavirus 2 isolate Wuhan-Hu-1, complete genome	2697049	Viruses	Pisuviricota	Pisoniviricetes	Nidovirales	Coronaviridae	Betacoronavirus	Severe acute respiratory syndrome-related coronavirus	Severe acute respiratory syndrome coronavirus 2	Severe acute respiratory syndrome coronavirus 2	5032138	Run1	RNA	Human	LESS
D-Chhani-Sept1	GU191019.1	34177	1674	200	0.618715	4.89803	1.1629	Human adenovirus 18 isolate D.C., complete genome	10528	Viruses	Preplasmiviricota	Tectiliviricetes	Rowavirales	Adenoviridae	Mastadenovirus	Human mastadenovirus A	Human adenovirus 18	Human adenovirus 18	5032138	Run1	DNA	Human	LESS
D-Chhani-Sept2	V01108.1	5153	5081	117794	2430.87	98.6028	4375.95	Human BK virus (strain Dunlop) genome. (Closely related to SV40.)	1891762	Viruses	Cossaviricota	Papovaviricetes	Sepolyvirales	Polyomaviridae	Betapolyomavirus	Betapolyomavirus hominis	unclassified Betapolyomavirus hominis subspecies/strain	unclassified Betapolyomavirus hominis strain	5223846	Run1	DNA	Human	Over 90%
D-Chhani-Sept2	J02226.1	5130	5090	27396	569.152	99.2203	1022.3	JC virus complete genome	10632	Viruses	Cossaviricota	Papovaviricetes	Sepolyvirales	Polyomaviridae	Betapolyomavirus	Betapolyomavirus secuhominis	JC polyomavirus	JC polyomavirus	5223846	Run1	DNA	Human	Over 90%
D-Chhani-Sept2	KY316160.1	34169	34057	176702	535.158	99.6722	989.963	Human adenovirus 41 isolate SH/2015/D16, complete genome	10524	Viruses	Preplasmiviricota	Tectiliviricetes	Rowavirales	Adenoviridae	Mastadenovirus	Human mastadenovirus F	Human adenovirus 41	Human adenovirus 41	5223846	Run1	DNA	Human	Over 90%
D-Chhani-Sept2	NC_012564.1	5242	5103	16145	316.204	97.3483	589.591	Human bocavirus 3, complete genome	638313	Viruses	Cossaviricota	Quintoviricetes	Piccovirales	Parvoviridae	Bocaparvovirus	Primate bocaparvovirus 1	Human bocavirus 3	Human bocavirus 3	5223846	Run1	DNA	Human	Over 90%
D-Chhani-Sept2	L19443.1	34214	34214	104413	317.316	100	584.198	Human adenovirus F, complete genome	130309	Viruses	Preplasmiviricota	Tectiliviricetes	Rowavirales	Adenoviridae	Mastadenovirus	Human mastadenovirus F	unclassified Human mastadenovirus F subspecies/strain	unclassified Human mastadenovirus F strain	5223846	Run1	DNA	Human	Over 90%
D-Chhani-Sept2	AF043303.1	4679	4618	13453	306.56	98.6963	550.397	Adeno-associated virus 2, complete genome	10804	Viruses	Cossaviricota	Quintoviricetes	Piccovirales	Parvoviridae	Dependoparvovirus	Adeno-associated dependoparvovirus A	adeno-associated virus 2	adeno-associated virus 2	5223846	Run1	DNA	Human	Over 90%
D-Chhani-Sept2	JQ326209.1	35153	33329	93889	278.799	94.8113	511.284	Human adenovirus 19, complete genome	28278	Viruses	Preplasmiviricota	Tectiliviricetes	Rowavirales	Adenoviridae	Mastadenovirus	Human mastadenovirus D	Human adenovirus 19	Human adenovirus 19	5223846	Run1	DNA	Human	Over 90%
D-Chhani-Sept2	AF108105.1	35100	32306	57914	172.758	92.0399	315.854	Human adenovirus type 17 complete genome	46922	Viruses	Preplasmiviricota	Tectiliviricetes	Rowavirales	Adenoviridae	Mastadenovirus	Human mastadenovirus D	Human adenovirus 17	Human adenovirus 17	5223846	Run1	DNA	Human	Over 90%
D-Chhani-Sept2	AB448776.1	35215	33334	56209	166.797	94.6585	305.554	Human adenovirus 37 genomic DNA, complete genome, isolate: 1991	52275	Viruses	Preplasmiviricota	Tectiliviricetes	Rowavirales	Adenoviridae	Mastadenovirus	Human mastadenovirus D	Human adenovirus D37	Human adenovirus D37	5223846	Run1	DNA	Human	Over 90%
D-Chhani-Sept2	FJ973560.1	4958	3383	6319	127.567	68.2332	243.978	Human bocavirus 2b NI strain HBoV2B-NI-213, complete genome	1511881	Viruses	Cossaviricota	Quintoviricetes	Piccovirales	Parvoviridae	Bocaparvovirus	Primate bocaparvovirus 2	Human bocavirus 2b NI	Human bocavirus 2b NI	5223846	Run1	DNA	Human	50% to 90%
D-Chhani-Sept2	MF118167.1	3925	1712	2708	71.1738	43.6178	132.074	Human fecal virus Jorvi2, complete genome	2017081	Viruses	Cressdnaviricota	Arfiviricetes	Cirlivirales	Circoviridae	unclassified Circoviridae genus	Human fecal virus Jorvi2	unclassified Human fecal virus Jorvi2 subspecies/strain	unclassified Human fecal virus Jorvi2 strain	5223846	Run1	DNA	Human	10% to 50%
D-Chhani-Sept2	HM011556.1	5387	5355	3506	68.4781	99.406	124.588	Merkel cell polyomavirus isolate R17b, complete genome	493803	Viruses	Cossaviricota	Papovaviricetes	Sepolyvirales	Polyomaviridae	Alphapolyomavirus	Alphapolyomavirus quintihominis	Merkel cell polyomavirus	Merkel cell polyomavirus	5223846	Run1	DNA	Human	Over 90%
D-Chhani-Sept2	NC_012042.1	5196	3199	2915	53.5755	61.5666	107.394	Human bocavirus 2c PK isolate PK-5510, complete genome	1511882	Viruses	Cossaviricota	Quintoviricetes	Piccovirales	Parvoviridae	Bocaparvovirus	Primate bocaparvovirus 2	Human bocavirus 2c PK	Human bocavirus 2c PK	5223846	Run1	DNA	Human	50% to 90%
D-Chhani-Sept2	NC_001356.1	7815	7686	3698	49.5896	98.3493	90.5832	Human papillomavirus - 1, complete genome	334203	Viruses	Cossaviricota	Papovaviricetes	Zurhausenvirales	Papillomaviridae	Mupapillomavirus	Mupapillomavirus 1	unclassified Mupapillomavirus 1 subspecies/strain	unclassified Mupapillomavirus 1 strain	5223846	Run1	DNA	Human	Over 90%
D-Chhani-Sept2	AB746853.1	34978	16886	9553	27.9441	48.2761	52.2823	Human adenovirus 8 DNA, complete genome, strain: Trim variant	31545	Viruses	Preplasmiviricota	Tectiliviricetes	Rowavirales	Adenoviridae	Mastadenovirus	Human mastadenovirus D	Human adenovirus D8	Human adenovirus D8	5223846	Run1	DNA	Human	10% to 50%
D-Chhani-Sept2	X70829.1	7308	6174	1584	22.4095	84.4828	41.4922	Human papillomavirus type 65 complete genome	28312	Viruses	Cossaviricota	Papovaviricetes	Zurhausenvirales	Papillomaviridae	Gammapapillomavirus	Gammapapillomavirus 1	Human papillomavirus 65	Human papillomavirus 65	5223846	Run1	DNA	Human	50% to 90%
D-Chhani-Sept2	U31781.1	7324	5940	1302	18.8607	81.1032	34.0308	Human papillomavirus type 23, complete genome	37955	Viruses	Cossaviricota	Papovaviricetes	Zurhausenvirales	Papillomaviridae	Betapapillomavirus	Betapapillomavirus 2	Human papillomavirus 23	Human papillomavirus 23	5223846	Run1	DNA	Human	50% to 90%
D-Chhani-Sept2	NC_012729.2	5104	2517	722	13.239	49.3143	27.0792	Human bocavirus 4 NI strain HBoV4-NI-385, complete genome	1511883	Viruses	Cossaviricota	Quintoviricetes	Piccovirales	Parvoviridae	Bocaparvovirus	Primate bocaparvovirus 2	Human bocavirus 4 NI	Human bocavirus 4 NI	5223846	Run1	DNA	Human	10% to 50%
D-Chhani-Sept2	X70828.1	7348	4910	1028	14.7269	66.8209	26.7814	Human papillomavirus type 63 complete genome	28311	Viruses	Cossaviricota	Papovaviricetes	Zurhausenvirales	Papillomaviridae	Mupapillomavirus	Mupapillomavirus 2	Human papillomavirus type 63	Human papillomavirus type 63	5223846	Run1	DNA	Human	50% to 90%
D-Chhani-Sept2	MH355567.1	35217	22965	4626	13.7298	65.21	25.1457	Human adenovirus 7 strain BJ/CHN/2018, complete genome	10519	Viruses	Preplasmiviricota	Tectiliviricetes	Rowavirales	Adenoviridae	Mastadenovirus	Human mastadenovirus B	Human adenovirus 7	Human adenovirus 7	5223846	Run1	DNA	Human	50% to 90%
D-Chhani-Sept2	AM749299.1	33763	21085	4041	12.3837	62.45	22.9117	Human adenovirus type 31 complete genome, serotype 31	10529	Viruses	Preplasmiviricota	Tectiliviricetes	Rowavirales	Adenoviridae	Mastadenovirus	Human mastadenovirus A	Human adenovirus 31	Human adenovirus 31	5223846	Run1	DNA	Human	50% to 90%
D-Chhani-Sept2	KX868289.2	33676	21008	3939	12.1408	62.3827	22.3911	Human adenovirus 12 isolate GyK010, complete genome	28282	Viruses	Preplasmiviricota	Tectiliviricetes	Rowavirales	Adenoviridae	Mastadenovirus	Human mastadenovirus A	Human adenovirus 12	Human adenovirus 12	5223846	Run1	DNA	Human	50% to 90%
D-Chhani-Sept2	U31780.1	7368	3860	768	11.1615	52.3887	19.9536	Human papillomavirus type 22, complete genome	37954	Viruses	Cossaviricota	Papovaviricetes	Zurhausenvirales	Papillomaviridae	Betapapillomavirus	Betapapillomavirus 2	Human papillomavirus 22	Human papillomavirus 22	5223846	Run1	DNA	Human	50% to 90%
D-Chhani-Sept2	EU233812.1	4139	1970	430	11.3916	47.596	19.8876	Anopheles gambiae densonucleosis virus, complete genome	487311	Viruses	Cossaviricota	Quintoviricetes	Piccovirales	Parvoviridae	Brevihamaparvovirus	Dipteran brevihamaparvovirus 1	Anopheles gambiae densovirus	Anopheles gambiae densovirus	5223846	Run1	DNA	Insect	10% to 50%
D-Chhani-Sept2	X70827.1	7353	4382	759	10.896	59.5947	19.76	Human papillomavirus type 4 complete genome	10617	Viruses	Cossaviricota	Papovaviricetes	Zurhausenvirales	Papillomaviridae	Gammapapillomavirus	Gammapapillomavirus 1	Human papillomavirus 4	Human papillomavirus 4	5223846	Run1	DNA	Human	50% to 90%
D-Chhani-Sept2	U31782.1	7452	4048	684	9.70693	54.321	17.5709	Human papillomavirus type 24, complete genome	37956	Viruses	Cossaviricota	Papovaviricetes	Zurhausenvirales	Papillomaviridae	Betapapillomavirus	Betapapillomavirus 1	human papillomavirus 24	human papillomavirus 24	5223846	Run1	DNA	Human	50% to 90%
D-Chhani-Sept2	AY461507.1	6034	1131	522	8.6759	18.7438	16.5606	Mythimna loreyi densovirus, complete genome	185636	Viruses	Cossaviricota	Quintoviricetes	Piccovirales	Parvoviridae	Ambidensovirus	Lepidopteran ambidensovirus 1	Mythimna loreyi densovirus	Mythimna loreyi densovirus	5223846	Run1	DNA	Insect	10% to 50%
D-Chhani-Sept2	JN860680.1	35384	17258	2393	6.99949	48.7735	12.9463	Human adenovirus 16 strain E26, complete genome	31544	Viruses	Preplasmiviricota	Tectiliviricetes	Rowavirales	Adenoviridae	Mastadenovirus	Human mastadenovirus B	Human adenovirus 16	Human adenovirus 16	5223846	Run1	DNA	Human	10% to 50%
D-Chhani-Sept2	MF588782.1	4152	2007	256	6.68491	48.3382	11.803	Gammapapillomavirus 22 isolate iGamma22_m090c255 E7 (E7), E1 (E1), E2 (E2), and E4 (E4) genes, complete cds	1961679	Viruses	Cossaviricota	Papovaviricetes	Zurhausenvirales	Papillomaviridae	Gammapapillomavirus	Gammapapillomavirus 22	unclassified Gammapapillomavirus 22 subspecies/strain	unclassified Gammapapillomavirus 22 strain	5223846	Run1	DNA	Human	10% to 50%
D-Chhani-Sept2	EU410349.1	7384	3472	448	6.52474	47.0206	11.6144	Human papillomavirus type 111, complete genome	518630	Viruses	Cossaviricota	Papovaviricetes	Zurhausenvirales	Papillomaviridae	Betapapillomavirus	Betapapillomavirus 2	Human papillomavirus 111	Human papillomavirus 111	5223846	Run1	DNA	Human	10% to 50%
D-Chhani-Sept2	EU410348.1	7423	2513	445	6.36285	33.8542	11.476	Human papillomavirus type 110, complete genome	518629	Viruses	Cossaviricota	Papovaviricetes	Zurhausenvirales	Papillomaviridae	Betapapillomavirus	Betapapillomavirus 2	Human papillomavirus 110	Human papillomavirus 110	5223846	Run1	DNA	Human	10% to 50%
D-Chhani-Sept2	GQ845444.1	7397	3060	416	5.91983	41.3681	10.7658	Human papillomavirus type 122, complete genome	765054	Viruses	Cossaviricota	Papovaviricetes	Zurhausenvirales	Papillomaviridae	Betapapillomavirus	Betapapillomavirus 2	Human papillomavirus 122	Human papillomavirus 122	5223846	Run1	DNA	Human	10% to 50%
D-Chhani-Sept2	HM011560.1	4926	1768	263	5.73074	35.8912	10.2205	Polyomavirus HPyV6 isolate 607a, complete genome	746830	Viruses	Cossaviricota	Papovaviricetes	Sepolyvirales	Polyomaviridae	Deltapolyomavirus	Deltapolyomavirus sextihominis	Human polyomavirus 6	Human polyomavirus 6	5223846	Run1	DNA	Human	10% to 50%
D-Chhani-Sept2	FJ947080.1	7476	2831	388	5.50587	37.8678	9.9351	Human papillomavirus type 115 isolate GC02, complete genome	696746	Viruses	Cossaviricota	Papovaviricetes	Zurhausenvirales	Papillomaviridae	Betapapillomavirus	Betapapillomavirus 3	human papillomavirus 115	human papillomavirus 115	5223846	Run1	DNA	Human	10% to 50%
D-Chhani-Sept2	U31790.1	7184	1961	365	5.41513	27.2968	9.72604	Human papillomavirus type 50, complete genome	40539	Viruses	Cossaviricota	Papovaviricetes	Zurhausenvirales	Papillomaviridae	Gammapapillomavirus	Gammapapillomavirus 3	Human papillomavirus type 50	Human papillomavirus type 50	5223846	Run1	DNA	Human	10% to 50%
D-Chhani-Sept2	HF930491.1	7359	2377	360	5.18491	32.3006	9.36469	Human papillomavirus type 174 complete genome, isolate V001	1347832	Viruses	Cossaviricota	Papovaviricetes	Zurhausenvirales	Papillomaviridae	Betapapillomavirus	Betapapillomavirus 2	Human papillomavirus 174	Human papillomavirus 174	5223846	Run1	DNA	Human	10% to 50%
D-Chhani-Sept2	U31787.1	7400	2435	351	5.05448	32.9054	9.07998	Human papillomavirus type 38, complete genome	37959	Viruses	Cossaviricota	Papovaviricetes	Zurhausenvirales	Papillomaviridae	Betapapillomavirus	Betapapillomavirus 2	Human papillomavirus 38	Human papillomavirus 38	5223846	Run1	DNA	Human	10% to 50%
D-Chhani-Sept2	S47266.1	5908	1016	270	3.90518	17.197	8.74849	orf1...orf4 [Junonia coenia densovirus JcDNV, Genomic Complete, 4 genes, 5908 nt]	12524	Viruses	Cossaviricota	Quintoviricetes	Piccovirales	Parvoviridae	Ambidensovirus	Lepidopteran ambidensovirus 1	Junonia coenia densovirus	Junonia coenia densovirus	5223846	Run1	DNA	Insect	10% to 50%
D-Chhani-Sept2	MF588745.1	7193	2737	302	4.40594	38.0509	8.03723	Gammapapillomavirus 23 isolate Gamma23_m090c10, complete genome	1961680	Viruses	Cossaviricota	Papovaviricetes	Zurhausenvirales	Papillomaviridae	Gammapapillomavirus	Gammapapillomavirus 23	unclassified Gammapapillomavirus 23 subspecies/strain	unclassified Gammapapillomavirus 23 strain	5223846	Run1	DNA	Human	10% to 50%
D-Chhani-Sept2	M17463.1	7746	1878	309	4.29265	24.2448	7.63643	Human papillomoavirus type 5, complete genome	333923	Viruses	Cossaviricota	Papovaviricetes	Zurhausenvirales	Papillomaviridae	Betapapillomavirus	Betapapillomavirus 1	Human papillomavirus 5	Human papillomavirus 5	5223846	Run1	DNA	Human	10% to 50%
D-Chhani-Sept2	X74469.1	7427	2187	285	4.10334	29.4466	7.34583	Human papillomavirus type 17 genomic DNA	10607	Viruses	Cossaviricota	Papovaviricetes	Zurhausenvirales	Papillomaviridae	Betapapillomavirus	Betapapillomavirus 2	Human papillomavirus 17	Human papillomavirus 17	5223846	Run1	DNA	Human	10% to 50%
D-Chhani-Sept2	MF588693.1	7226	2601	277	4.09087	35.995	7.33823	Gammapapillomavirus sp. isolate Gamma_w34c04a, complete genome	2049444	Viruses	Cossaviricota	Papovaviricetes	Zurhausenvirales	Papillomaviridae	Gammapapillomavirus	Gammapapillomavirus sp.	unclassified Gammapapillomavirus sp. subspecies/strain	unclassified Gammapapillomavirus sp. strain	5223846	Run1	DNA	Human	10% to 50%
D-Chhani-Sept2	GQ845442.1	7304	1822	270	3.93025	24.9452	7.0764	Human papillomavirus type 120, complete genome	765052	Viruses	Cossaviricota	Papovaviricetes	Zurhausenvirales	Papillomaviridae	Betapapillomavirus	Betapapillomavirus 2	Human papillomavirus 120	Human papillomavirus 120	5223846	Run1	DNA	Human	10% to 50%
D-Chhani-Sept2	M12737.1	7654	1758	273	3.85208	22.9684	6.82785	Human papillomavirus type 8, complete genome	10579	Viruses	Cossaviricota	Papovaviricetes	Zurhausenvirales	Papillomaviridae	Betapapillomavirus	Betapapillomavirus 1	Human papillomavirus type 8	Human papillomavirus type 8	5223846	Run1	DNA	Human	10% to 50%
D-Chhani-Sept2	Y15174.1	7549	1661	262	3.7051	22.0029	6.64388	Human papillomavirus type 76 E6, E7, E1, E2, E4, L2, and L1 genes	69985	Viruses	Cossaviricota	Papovaviricetes	Zurhausenvirales	Papillomaviridae	Betapapillomavirus	Betapapillomavirus 3	human papillomavirus 76	human papillomavirus 76	5223846	Run1	DNA	Human	10% to 50%
D-Chhani-Sept2	U31786.1	7421	1977	248	3.54325	26.6406	6.39733	Human papillomavirus type 37, complete genome	37958	Viruses	Cossaviricota	Papovaviricetes	Zurhausenvirales	Papillomaviridae	Betapapillomavirus	Betapapillomavirus 2	Human papillomavirus 37	Human papillomavirus 37	5223846	Run1	DNA	Human	10% to 50%
D-Chhani-Sept2	MF588729.1	7339	1291	226	3.04896	17.591	5.89496	Gammapapillomavirus 18 isolate Gamma18_EV03c188, complete genome	1513263	Viruses	Cossaviricota	Papovaviricetes	Zurhausenvirales	Papillomaviridae	Gammapapillomavirus	Gammapapillomavirus 18	unclassified Gammapapillomavirus 18 subspecies/strain	unclassified Gammapapillomavirus 18 strain	5223846	Run1	DNA	Human	10% to 50%
D-Chhani-Sept2	X74468.1	7412	1533	216	3.07216	20.6827	5.57864	Human papillomavirus type 15 genomic DNA	10606	Viruses	Cossaviricota	Papovaviricetes	Zurhausenvirales	Papillomaviridae	Betapapillomavirus	Betapapillomavirus 2	Human papillomavirus 15	Human papillomavirus 15	5223846	Run1	DNA	Human	10% to 50%
D-Chhani-Sept2	GU117634.1	7309	1554	203	3.01034	21.2615	5.31677	Human papillomavirus type 134, complete genome	909333	Viruses	Cossaviricota	Papovaviricetes	Zurhausenvirales	Papillomaviridae	Gammapapillomavirus	Gammapapillomavirus 7	Human papillomavirus 134	Human papillomavirus 134	5223846	Run1	DNA	Human	10% to 50%
D-Chhani-Sept2	X74464.1	7434	1615	193	3.66282	21.7245	4.96986	Human papillomavirus type 9 genomic DNA	10621	Viruses	Cossaviricota	Papovaviricetes	Zurhausenvirales	Papillomaviridae	Betapapillomavirus	Betapapillomavirus 2	Human papillomavirus 9	Human papillomavirus 9	5223846	Run1	DNA	Human	10% to 50%
D-Chhani-Sept2	X74480.1	7560	1454	193	2.70081	19.2328	4.88703	Human papillomavirus type 49 genomic DNA	10616	Viruses	Cossaviricota	Papovaviricetes	Zurhausenvirales	Papillomaviridae	Betapapillomavirus	Betapapillomavirus 3	Human papillomavirus type 49	Human papillomavirus type 49	5223846	Run1	DNA	Human	10% to 50%
D-Chhani-Sept2	Y15176.1	7427	1703	188	2.66222	22.9299	4.84567	Human papillomavirus type 80 E6, E7, E1, E2, E4, L2, and L1 genes	69987	Viruses	Cossaviricota	Papovaviricetes	Zurhausenvirales	Papillomaviridae	Betapapillomavirus	Betapapillomavirus 2	Human papillomavirus 80	Human papillomavirus 80	5223846	Run1	DNA	Human	10% to 50%
D-Chhani-Sept2	MF588756.1	7230	1905	182	2.6154	26.3485	4.81884	Gammapapillomavirus sp. isolate GammaiDysk6_wg1c05, complete genome	2049444	Viruses	Cossaviricota	Papovaviricetes	Zurhausenvirales	Papillomaviridae	Gammapapillomavirus	Gammapapillomavirus sp.	unclassified Gammapapillomavirus sp. subspecies/strain	unclassified Gammapapillomavirus sp. strain	5223846	Run1	DNA	Human	10% to 50%
D-Chhani-Sept2	HM999999.1	7224	1793	174	2.41744	24.82	4.61085	Human papillomavirus type 147 isolate GH659, complete genome	1070420	Viruses	Cossaviricota	Papovaviricetes	Zurhausenvirales	Papillomaviridae	Gammapapillomavirus	Gammapapillomavirus 8	human papillomavirus 147	human papillomavirus 147	5223846	Run1	DNA	Human	10% to 50%
D-Chhani-Sept2	Y15173.1	7537	1283	177	2.53202	17.0227	4.49557	Human papillomavirus type 75 E6, E7, E1, E2, E4, L2, and L1 genes	69984	Viruses	Cossaviricota	Papovaviricetes	Zurhausenvirales	Papillomaviridae	Betapapillomavirus	Betapapillomavirus 3	human papillomavirus 75	human papillomavirus 75	5223846	Run1	DNA	Human	10% to 50%
D-Chhani-Sept2	JX444073.1	7143	1614	161	2.3964	22.5955	4.31474	Human papillomavirus KC5, complete genome	1647924	Viruses	Cossaviricota	Papovaviricetes	Zurhausenvirales	Papillomaviridae	Gammapapillomavirus	Human papillomavirus KC5	unclassified Human papillomavirus KC5 subspecies/strain	unclassified Human papillomavirus KC5 strain	5223846	Run1	DNA	Human	10% to 50%
D-Chhani-Sept2	M32305.1	7726	1103	165	2.28669	14.2765	4.08826	Human papillomavirus type 47 (HPV-47) +-sense strand	10594	Viruses	Cossaviricota	Papovaviricetes	Zurhausenvirales	Papillomaviridae	Betapapillomavirus	Betapapillomavirus 1	human papillomavirus 47	human papillomavirus 47	5223846	Run1	DNA	Human	10% to 50%
D-Chhani-Sept2	MF588704.1	7227	1343	146	2.09609	18.5831	3.86727	Gammapapillomavirus 8 isolate Gamma08_do1c232, complete genome	1175850	Viruses	Cossaviricota	Papovaviricetes	Zurhausenvirales	Papillomaviridae	Gammapapillomavirus	Gammapapillomavirus 8	unclassified Gammapapillomavirus 8 subspecies/strain	unclassified Gammapapillomavirus 8 strain	5223846	Run1	DNA	Human	10% to 50%
D-Chhani-Sept2	KR816170.1	7416	1510	139	2.04032	20.3614	3.58802	Human papillomavirus type 182 isolate ACS214, complete genome	1851125	Viruses	Cossaviricota	Papovaviricetes	Zurhausenvirales	Papillomaviridae	Betapapillomavirus	Betapapillomavirus 2	Human papillomavirus type 182	Human papillomavirus type 182	5223846	Run1	DNA	Human	10% to 50%
D-Chhani-Sept2	GU233853.1	7219	1663	133	1.93818	23.0364	3.52683	Human papillomavirus type 129, complete genome	931210	Viruses	Cossaviricota	Papovaviricetes	Zurhausenvirales	Papillomaviridae	Gammapapillomavirus	Gammapapillomavirus 9	Human papillomavirus type 129	Human papillomavirus type 129	5223846	Run1	DNA	Human	10% to 50%
D-Chhani-Sept2	MF588725.1	7262	1058	130	1.84674	14.569	3.42686	Gammapapillomavirus 15 isolate Gamma15_w18c134, complete genome	1513260	Viruses	Cossaviricota	Papovaviricetes	Zurhausenvirales	Papillomaviridae	Gammapapillomavirus	Gammapapillomavirus 15	unclassified Gammapapillomavirus 15 subspecies/strain	unclassified Gammapapillomavirus 15 strain	5223846	Run1	DNA	Human	10% to 50%
D-Chhani-Sept2	FM955837.2	7466	1418	130	1.85197	18.9928	3.33323	Human papillomavirus type 98, complete genome	587347	Viruses	Cossaviricota	Papovaviricetes	Zurhausenvirales	Papillomaviridae	Betapapillomavirus	Betapapillomavirus 1	Human papillomavirus 98	Human papillomavirus 98	5223846	Run1	DNA	Human	10% to 50%
D-Chhani-Sept2	EU410347.1	7401	1271	122	1.72128	17.1734	3.15558	Human papillomavirus FA75/KI88-03, complete genome	563190	Viruses	Cossaviricota	Papovaviricetes	Zurhausenvirales	Papillomaviridae	Betapapillomavirus	Betapapillomavirus 2	Human papillomavirus FA75/KI88-03	Human papillomavirus FA75/KI88-03	5223846	Run1	DNA	Human	10% to 50%
D-Chhani-Sept2	MF588719.1	7110	1116	111	1.66106	15.6962	2.98857	Gammapapillomavirus 12 isolate Gamma12_w23c77, complete genome	1513257	Viruses	Cossaviricota	Papovaviricetes	Zurhausenvirales	Papillomaviridae	Gammapapillomavirus	Gammapapillomavirus 12	unclassified Gammapapillomavirus 12 subspecies/strain	unclassified Gammapapillomavirus 12 strain	5223846	Run1	DNA	Human	10% to 50%
D-Chhani-Sept2	AC_000008.1	35938	3673	492	1.38655	10.2204	2.62072	Human adenovirus 5, complete genome	28285	Viruses	Preplasmiviricota	Tectiliviricetes	Rowavirales	Adenoviridae	Mastadenovirus	Human mastadenovirus C	Human adenovirus 5	Human adenovirus 5	5223846	Run1	DNA	Human	10% to 50%
D-Chhani-Sept2	FM955841.1	7667	1184	103	1.3657	15.4428	2.57171	Human papillomavirus type 105, complete genome	587350	Viruses	Cossaviricota	Papovaviricetes	Zurhausenvirales	Papillomaviridae	Betapapillomavirus	Betapapillomavirus 1	Human papillomavirus 105	Human papillomavirus 105	5223846	Run1	DNA	Human	10% to 50%
D-Chhani-Sept2	GU191019.1	34177	3458	402	1.23117	10.1179	2.25165	Human adenovirus 18 isolate D.C., complete genome	10528	Viruses	Preplasmiviricota	Tectiliviricetes	Rowavirales	Adenoviridae	Mastadenovirus	Human mastadenovirus A	Human adenovirus 18	Human adenovirus 18	5223846	Run1	DNA	Human	10% to 50%
D-Chhani-Sept2	X74466.1	7673	1145	89	1.20776	14.9225	2.22042	Human papillomavirus type 12 genomic DNA	10604	Viruses	Cossaviricota	Papovaviricetes	Zurhausenvirales	Papillomaviridae	Betapapillomavirus	Betapapillomavirus 1	human papillomavirus 12	human papillomavirus 12	5223846	Run1	DNA	Human	10% to 50%
D-Chhani-Sept2	MF588682.1	7323	1036	81	1.10874	14.1472	2.11741	Betapapillomavirus 2 isolate Beta02_m292c14, complete genome	333924	Viruses	Cossaviricota	Papovaviricetes	Zurhausenvirales	Papillomaviridae	Betapapillomavirus	Betapapillomavirus 2	unclassified Betapapillomavirus 2 subspecies/strain	unclassified Betapapillomavirus 2 strain	5223846	Run1	DNA	Human	10% to 50%
D-Chhani-Sept2	HM999997.1	7375	1043	81	1.14422	14.1424	2.10248	Human papillomavirus type 145 isolate CL4112, complete genome	1070418	Viruses	Cossaviricota	Papovaviricetes	Zurhausenvirales	Papillomaviridae	Betapapillomavirus	Betapapillomavirus 2	Human papillomavirus 145	Human papillomavirus 145	5223846	Run1	DNA	Human	10% to 50%
D-Chhani-Sept2	KX121164.1	41981	3913	452	1.12132	9.32088	2.06108	Pigeon adenovirus 2 isolate YPDS-Y-V1.A19.11-2013, complete genome	1907767	Viruses	Preplasmiviricota	Tectiliviricetes	Rowavirales	Adenoviridae	Aviadenovirus	Pigeon aviadenovirus B	Pigeon adenovirus 2	Pigeon adenovirus 2	5223846	Run1	DNA	Animal	LESS
D-Chhani-Sept2	FJ349096.1	35758	2574	200	0.564985	7.19839	1.0707	Human adenovirus 6 strain Tonsil 99 prototype, complete genome	10534	Viruses	Preplasmiviricota	Tectiliviricetes	Rowavirales	Adenoviridae	Mastadenovirus	Human mastadenovirus C	Human adenovirus 6	Human adenovirus 6	5223846	Run1	DNA	Human	LESS
D-Chhani-Sept2	NC_009334.1	172764	2954	223	0.131165	1.70985	0.247093	Human herpesvirus 4, complete genome	12509	Viruses	Peploviricota	Herviviricetes	Herpesvirales	Herpesviridae	Lymphocryptovirus	Human gammaherpesvirus 4	Human herpesvirus 4 type 2	Human herpesvirus 4 type 2	5223846	Run1	DNA	Human	LESS
D-Gajarwadi-Sept1	J02226.1	5130	5091	333837	6918.45	99.2398	9900.18	JC virus complete genome	10632	Viruses	Cossaviricota	Papovaviricetes	Sepolyvirales	Polyomaviridae	Betapolyomavirus	Betapolyomavirus secuhominis	JC polyomavirus	JC polyomavirus	6573154	Run1	DNA	Human	Over 90%
D-Gajarwadi-Sept1	AF043303.1	4679	4679	40648	922.739	100	1321.64	Adeno-associated virus 2, complete genome	10804	Viruses	Cossaviricota	Quintoviricetes	Piccovirales	Parvoviridae	Dependoparvovirus	Adeno-associated dependoparvovirus A	adeno-associated virus 2	adeno-associated virus 2	6573154	Run1	DNA	Human	Over 90%
D-Gajarwadi-Sept1	L19443.1	34214	34214	208627	629.794	100	927.669	Human adenovirus F, complete genome	130309	Viruses	Preplasmiviricota	Tectiliviricetes	Rowavirales	Adenoviridae	Mastadenovirus	Human mastadenovirus F	unclassified Human mastadenovirus F subspecies/strain	unclassified Human mastadenovirus F strain	6573154	Run1	DNA	Human	Over 90%
D-Gajarwadi-Sept1	V01108.1	5153	5039	30534	625.045	97.7877	901.467	Human BK virus (strain Dunlop) genome. (Closely related to SV40.)	1891762	Viruses	Cossaviricota	Papovaviricetes	Sepolyvirales	Polyomaviridae	Betapolyomavirus	Betapolyomavirus hominis	unclassified Betapolyomavirus hominis subspecies/strain	unclassified Betapolyomavirus hominis strain	6573154	Run1	DNA	Human	Over 90%
D-Gajarwadi-Sept1	KY316160.1	34169	34103	181535	546.41	99.8068	808.266	Human adenovirus 41 isolate SH/2015/D16, complete genome	10524	Viruses	Preplasmiviricota	Tectiliviricetes	Rowavirales	Adenoviridae	Mastadenovirus	Human mastadenovirus F	Human adenovirus 41	Human adenovirus 41	6573154	Run1	DNA	Human	Over 90%
D-Gajarwadi-Sept1	JQ326209.1	35153	34071	107329	316.033	96.922	464.495	Human adenovirus 19, complete genome	28278	Viruses	Preplasmiviricota	Tectiliviricetes	Rowavirales	Adenoviridae	Mastadenovirus	Human mastadenovirus D	Human adenovirus 19	Human adenovirus 19	6573154	Run1	DNA	Human	Over 90%
D-Gajarwadi-Sept1	AF108105.1	35100	32127	73657	218.234	91.5299	319.252	Human adenovirus type 17 complete genome	46922	Viruses	Preplasmiviricota	Tectiliviricetes	Rowavirales	Adenoviridae	Mastadenovirus	Human mastadenovirus D	Human adenovirus 17	Human adenovirus 17	6573154	Run1	DNA	Human	Over 90%
D-Gajarwadi-Sept1	AB448776.1	35215	33786	72537	214.093	95.9421	313.37	Human adenovirus 37 genomic DNA, complete genome, isolate: 1991	52275	Viruses	Preplasmiviricota	Tectiliviricetes	Rowavirales	Adenoviridae	Mastadenovirus	Human mastadenovirus D	Human adenovirus D37	Human adenovirus D37	6573154	Run1	DNA	Human	Over 90%
D-Gajarwadi-Sept1	NC_012564.1	5242	4712	7293	139.388	89.8894	211.658	Human bocavirus 3, complete genome	638313	Viruses	Cossaviricota	Quintoviricetes	Piccovirales	Parvoviridae	Bocaparvovirus	Primate bocaparvovirus 1	Human bocavirus 3	Human bocavirus 3	6573154	Run1	DNA	Human	50% to 90%
D-Gajarwadi-Sept1	NC_012042.1	5196	3505	7027	139.128	67.4557	205.744	Human bocavirus 2c PK isolate PK-5510, complete genome	1511882	Viruses	Cossaviricota	Quintoviricetes	Piccovirales	Parvoviridae	Bocaparvovirus	Primate bocaparvovirus 2	Human bocavirus 2c PK	Human bocavirus 2c PK	6573154	Run1	DNA	Human	50% to 90%
D-Gajarwadi-Sept1	NC_001356.1	7815	7813	10267	137.552	99.9744	199.867	Human papillomavirus - 1, complete genome	334203	Viruses	Cossaviricota	Papovaviricetes	Zurhausenvirales	Papillomaviridae	Mupapillomavirus	Mupapillomavirus 1	unclassified Mupapillomavirus 1 subspecies/strain	unclassified Mupapillomavirus 1 strain	6573154	Run1	DNA	Human	Over 90%
D-Gajarwadi-Sept1	X70829.1	7308	7305	9459	134.888	99.9589	196.912	Human papillomavirus type 65 complete genome	28312	Viruses	Cossaviricota	Papovaviricetes	Zurhausenvirales	Papillomaviridae	Gammapapillomavirus	Gammapapillomavirus 1	Human papillomavirus 65	Human papillomavirus 65	6573154	Run1	DNA	Human	Over 90%
D-Gajarwadi-Sept1	X70828.1	7348	7348	5945	85.0579	100	123.086	Human papillomavirus type 63 complete genome	28311	Viruses	Cossaviricota	Papovaviricetes	Zurhausenvirales	Papillomaviridae	Mupapillomavirus	Mupapillomavirus 2	Human papillomavirus type 63	Human papillomavirus type 63	6573154	Run1	DNA	Human	Over 90%
D-Gajarwadi-Sept1	JN860680.1	35384	33946	20139	58.8528	95.936	86.5879	Human adenovirus 16 strain E26, complete genome	31544	Viruses	Preplasmiviricota	Tectiliviricetes	Rowavirales	Adenoviridae	Mastadenovirus	Human mastadenovirus B	Human adenovirus 16	Human adenovirus 16	6573154	Run1	DNA	Human	Over 90%
D-Gajarwadi-Sept1	HM011556.1	5387	5247	2521	49.3872	97.4012	71.1954	Merkel cell polyomavirus isolate R17b, complete genome	493803	Viruses	Cossaviricota	Papovaviricetes	Sepolyvirales	Polyomaviridae	Alphapolyomavirus	Alphapolyomavirus quintihominis	Merkel cell polyomavirus	Merkel cell polyomavirus	6573154	Run1	DNA	Human	Over 90%
D-Gajarwadi-Sept1	AB746853.1	34978	19290	11734	34.0745	55.149	51.0361	Human adenovirus 8 DNA, complete genome, strain: Trim variant	31545	Viruses	Preplasmiviricota	Tectiliviricetes	Rowavirales	Adenoviridae	Mastadenovirus	Human mastadenovirus D	Human adenovirus D8	Human adenovirus D8	6573154	Run1	DNA	Human	50% to 90%
D-Gajarwadi-Sept1	AM749299.1	33763	31690	11211	34.4409	93.8601	50.5161	Human adenovirus type 31 complete genome, serotype 31	10529	Viruses	Preplasmiviricota	Tectiliviricetes	Rowavirales	Adenoviridae	Mastadenovirus	Human mastadenovirus A	Human adenovirus 31	Human adenovirus 31	6573154	Run1	DNA	Human	Over 90%
D-Gajarwadi-Sept1	EU233812.1	4139	2955	1368	35.3778	71.3941	50.2825	Anopheles gambiae densonucleosis virus, complete genome	487311	Viruses	Cossaviricota	Quintoviricetes	Piccovirales	Parvoviridae	Brevihamaparvovirus	Dipteran brevihamaparvovirus 1	Anopheles gambiae densovirus	Anopheles gambiae densovirus	6573154	Run1	DNA	Insect	50% to 90%
D-Gajarwadi-Sept1	FJ973560.1	4958	2170	1455	27.1113	43.7676	44.646	Human bocavirus 2b NI strain HBoV2B-NI-213, complete genome	1511881	Viruses	Cossaviricota	Quintoviricetes	Piccovirales	Parvoviridae	Bocaparvovirus	Primate bocaparvovirus 2	Human bocavirus 2b NI	Human bocavirus 2b NI	6573154	Run1	DNA	Human	10% to 50%
D-Gajarwadi-Sept1	X01457.1	5176	2492	1405	29.0191	48.1453	41.296	Parvovirus h-1, complete genome	10799	Viruses	Cossaviricota	Quintoviricetes	Piccovirales	Parvoviridae	Protoparvovirus	Rodent protoparvovirus 1	H-1 parvovirus	H-1 parvovirus	6573154	Run1	DNA	Human	10% to 50%
D-Gajarwadi-Sept1	U48704.1	4726	1504	1253	27.8783	31.824	40.3351	Adeno-associated virus 3 nonstructural protein and capsid protein genes, complete cds, and complete genome	46350	Viruses	Cossaviricota	Quintoviricetes	Piccovirales	Parvoviridae	Dependoparvovirus	Adeno-associated dependoparvovirus A	Adeno-associated virus - 3	Adeno-associated virus - 3	6573154	Run1	DNA	Human	10% to 50%
D-Gajarwadi-Sept1	GQ845444.1	7397	6729	1719	24.7055	90.9693	35.3546	Human papillomavirus type 122, complete genome	765054	Viruses	Cossaviricota	Papovaviricetes	Zurhausenvirales	Papillomaviridae	Betapapillomavirus	Betapapillomavirus 2	Human papillomavirus 122	Human papillomavirus 122	6573154	Run1	DNA	Human	Over 90%
D-Gajarwadi-Sept1	KX384958.1	35250	24189	6223	18.0793	68.6213	26.8576	Human adenovirus B3 strain T382/Ft Jackson South Carolina USA/2002, complete genome	45659	Viruses	Preplasmiviricota	Tectiliviricetes	Rowavirales	Adenoviridae	Mastadenovirus	Human mastadenovirus B	Human adenovirus B3	Human adenovirus B3	6573154	Run1	DNA	Human	50% to 90%
D-Gajarwadi-Sept1	X70827.1	7353	6434	1255	17.9395	87.5017	25.966	Human papillomavirus type 4 complete genome	10617	Viruses	Cossaviricota	Papovaviricetes	Zurhausenvirales	Papillomaviridae	Gammapapillomavirus	Gammapapillomavirus 1	Human papillomavirus 4	Human papillomavirus 4	6573154	Run1	DNA	Human	50% to 90%
D-Gajarwadi-Sept1	Y15176.1	7427	6620	1179	16.8086	89.1342	24.1505	Human papillomavirus type 80 E6, E7, E1, E2, E4, L2, and L1 genes	69987	Viruses	Cossaviricota	Papovaviricetes	Zurhausenvirales	Papillomaviridae	Betapapillomavirus	Betapapillomavirus 2	Human papillomavirus 80	Human papillomavirus 80	6573154	Run1	DNA	Human	50% to 90%
D-Gajarwadi-Sept1	MF588775.1	6160	5483	937	15.9797	89.0097	23.1412	Gammapapillomavirus 18 isolate iGamma18_w24c02 E2 (E2), L2 (L2), and L1 (L1) genes, complete cds	1513263	Viruses	Cossaviricota	Papovaviricetes	Zurhausenvirales	Papillomaviridae	Gammapapillomavirus	Gammapapillomavirus 18	unclassified Gammapapillomavirus 18 subspecies/strain	unclassified Gammapapillomavirus 18 strain	6573154	Run1	DNA	Human	50% to 90%
D-Gajarwadi-Sept1	FM955842.1	7412	5742	1117	15.8601	77.469	22.9268	Human papillomavirus type 113, complete genome	587351	Viruses	Cossaviricota	Papovaviricetes	Zurhausenvirales	Papillomaviridae	Betapapillomavirus	Betapapillomavirus 2	Human papillomavirus 113	Human papillomavirus 113	6573154	Run1	DNA	Human	50% to 90%
D-Gajarwadi-Sept1	U31790.1	7184	5740	1005	14.5348	79.8998	21.2827	Human papillomavirus type 50, complete genome	40539	Viruses	Cossaviricota	Papovaviricetes	Zurhausenvirales	Papillomaviridae	Gammapapillomavirus	Gammapapillomavirus 3	Human papillomavirus type 50	Human papillomavirus type 50	6573154	Run1	DNA	Human	50% to 90%
D-Gajarwadi-Sept1	AY461507.1	6034	1583	818	14.0574	26.2347	20.6241	Mythimna loreyi densovirus, complete genome	185636	Viruses	Cossaviricota	Quintoviricetes	Piccovirales	Parvoviridae	Ambidensovirus	Lepidopteran ambidensovirus 1	Mythimna loreyi densovirus	Mythimna loreyi densovirus	6573154	Run1	DNA	Insect	10% to 50%
D-Gajarwadi-Sept1	S47266.1	5908	1032	703	11.1666	17.4678	18.1026	orf1...orf4 [Junonia coenia densovirus JcDNV, Genomic Complete, 4 genes, 5908 nt]	12524	Viruses	Cossaviricota	Quintoviricetes	Piccovirales	Parvoviridae	Ambidensovirus	Lepidopteran ambidensovirus 1	Junonia coenia densovirus	Junonia coenia densovirus	6573154	Run1	DNA	Insect	10% to 50%
D-Gajarwadi-Sept1	U31787.1	7400	5035	837	11.7226	68.0405	17.2076	Human papillomavirus type 38, complete genome	37959	Viruses	Cossaviricota	Papovaviricetes	Zurhausenvirales	Papillomaviridae	Betapapillomavirus	Betapapillomavirus 2	Human papillomavirus 38	Human papillomavirus 38	6573154	Run1	DNA	Human	50% to 90%
D-Gajarwadi-Sept1	MF588725.1	7262	5313	816	11.5742	73.1617	17.0946	Gammapapillomavirus 15 isolate Gamma15_w18c134, complete genome	1513260	Viruses	Cossaviricota	Papovaviricetes	Zurhausenvirales	Papillomaviridae	Gammapapillomavirus	Gammapapillomavirus 15	unclassified Gammapapillomavirus 15 subspecies/strain	unclassified Gammapapillomavirus 15 strain	6573154	Run1	DNA	Human	50% to 90%
D-Gajarwadi-Sept1	HF930491.1	7359	5265	775	11.1131	71.545	16.0217	Human papillomavirus type 174 complete genome, isolate V001	1347832	Viruses	Cossaviricota	Papovaviricetes	Zurhausenvirales	Papillomaviridae	Betapapillomavirus	Betapapillomavirus 2	Human papillomavirus 174	Human papillomavirus 174	6573154	Run1	DNA	Human	50% to 90%
D-Gajarwadi-Sept1	U31781.1	7324	5114	679	9.53931	69.8252	14.1042	Human papillomavirus type 23, complete genome	37955	Viruses	Cossaviricota	Papovaviricetes	Zurhausenvirales	Papillomaviridae	Betapapillomavirus	Betapapillomavirus 2	Human papillomavirus 23	Human papillomavirus 23	6573154	Run1	DNA	Human	50% to 90%
D-Gajarwadi-Sept1	JX429973.1	7329	4519	650	9.12941	61.6592	13.4926	Human papillomavirus type 156 isolate GC01, complete genome	1248396	Viruses	Cossaviricota	Papovaviricetes	Zurhausenvirales	Papillomaviridae	Gammapapillomavirus	Gammapapillomavirus 18	Human papillomavirus type 156	Human papillomavirus type 156	6573154	Run1	DNA	Human	50% to 90%
D-Gajarwadi-Sept1	MF588724.1	7272	4210	626	8.97234	57.8933	13.0962	Gammapapillomavirus 15 isolate Gamma15_EV03c104, complete genome	1513260	Viruses	Cossaviricota	Papovaviricetes	Zurhausenvirales	Papillomaviridae	Gammapapillomavirus	Gammapapillomavirus 15	unclassified Gammapapillomavirus 15 subspecies/strain	unclassified Gammapapillomavirus 15 strain	6573154	Run1	DNA	Human	50% to 90%
D-Gajarwadi-Sept1	MF588791.1	789	423	67	9.99061	53.6122	12.9189	Gammapapillomavirus 25 isolate iGamma25_w35c16b E7 (E7) and E1 (E1) genes, partial cds	1961682	Viruses	Cossaviricota	Papovaviricetes	Zurhausenvirales	Papillomaviridae	Gammapapillomavirus	Gammapapillomavirus 25	unclassified Gammapapillomavirus 25 subspecies/strain	unclassified Gammapapillomavirus 25 strain	6573154	Run1	DNA	Human	50% to 90%
D-Gajarwadi-Sept1	MF588729.1	7339	4890	599	8.33009	66.6303	12.417	Gammapapillomavirus 18 isolate Gamma18_EV03c188, complete genome	1513263	Viruses	Cossaviricota	Papovaviricetes	Zurhausenvirales	Papillomaviridae	Gammapapillomavirus	Gammapapillomavirus 18	unclassified Gammapapillomavirus 18 subspecies/strain	unclassified Gammapapillomavirus 18 strain	6573154	Run1	DNA	Human	50% to 90%
D-Gajarwadi-Sept1	EU410349.1	7384	4931	572	8.21247	66.7795	11.785	Human papillomavirus type 111, complete genome	518630	Viruses	Cossaviricota	Papovaviricetes	Zurhausenvirales	Papillomaviridae	Betapapillomavirus	Betapapillomavirus 2	Human papillomavirus 111	Human papillomavirus 111	6573154	Run1	DNA	Human	50% to 90%
D-Gajarwadi-Sept1	MF588756.1	7230	3831	545	7.80862	52.9876	11.4679	Gammapapillomavirus sp. isolate GammaiDysk6_wg1c05, complete genome	2049444	Viruses	Cossaviricota	Papovaviricetes	Zurhausenvirales	Papillomaviridae	Gammapapillomavirus	Gammapapillomavirus sp.	unclassified Gammapapillomavirus sp. subspecies/strain	unclassified Gammapapillomavirus sp. strain	6573154	Run1	DNA	Human	50% to 90%
D-Gajarwadi-Sept1	Y15173.1	7537	5184	563	7.8695	68.7807	11.3641	Human papillomavirus type 75 E6, E7, E1, E2, E4, L2, and L1 genes	69984	Viruses	Cossaviricota	Papovaviricetes	Zurhausenvirales	Papillomaviridae	Betapapillomavirus	Betapapillomavirus 3	human papillomavirus 75	human papillomavirus 75	6573154	Run1	DNA	Human	50% to 90%
D-Gajarwadi-Sept1	MF588745.1	7193	4015	522	7.51952	55.8182	11.0404	Gammapapillomavirus 23 isolate Gamma23_m090c10, complete genome	1961680	Viruses	Cossaviricota	Papovaviricetes	Zurhausenvirales	Papillomaviridae	Gammapapillomavirus	Gammapapillomavirus 23	unclassified Gammapapillomavirus 23 subspecies/strain	unclassified Gammapapillomavirus 23 strain	6573154	Run1	DNA	Human	50% to 90%
D-Gajarwadi-Sept1	FJ947080.1	7476	4029	539	7.64073	53.8925	10.9685	Human papillomavirus type 115 isolate GC02, complete genome	696746	Viruses	Cossaviricota	Papovaviricetes	Zurhausenvirales	Papillomaviridae	Betapapillomavirus	Betapapillomavirus 3	human papillomavirus 115	human papillomavirus 115	6573154	Run1	DNA	Human	50% to 90%
D-Gajarwadi-Sept1	MF588792.1	1997	1272	141	7.90525	63.6955	10.7416	Gammapapillomavirus sp. isolate iGammaDysk6_w20c207a L1 (L1) and E6 (E6) genes, partial cds	2049444	Viruses	Cossaviricota	Papovaviricetes	Zurhausenvirales	Papillomaviridae	Gammapapillomavirus	Gammapapillomavirus sp.	unclassified Gammapapillomavirus sp. subspecies/strain	unclassified Gammapapillomavirus sp. strain	6573154	Run1	DNA	Human	50% to 90%
D-Gajarwadi-Sept1	KX868289.2	33676	19859	2279	7.01712	58.9708	10.2956	Human adenovirus 12 isolate GyK010, complete genome	28282	Viruses	Preplasmiviricota	Tectiliviricetes	Rowavirales	Adenoviridae	Mastadenovirus	Human mastadenovirus A	Human adenovirus 12	Human adenovirus 12	6573154	Run1	DNA	Human	50% to 90%
D-Gajarwadi-Sept1	HM999999.1	7224	3546	476	6.83277	49.0864	10.0243	Human papillomavirus type 147 isolate GH659, complete genome	1070420	Viruses	Cossaviricota	Papovaviricetes	Zurhausenvirales	Papillomaviridae	Gammapapillomavirus	Gammapapillomavirus 8	human papillomavirus 147	human papillomavirus 147	6573154	Run1	DNA	Human	10% to 50%
D-Gajarwadi-Sept1	GQ845442.1	7304	3300	434	6.22784	45.1807	9.03972	Human papillomavirus type 120, complete genome	765052	Viruses	Cossaviricota	Papovaviricetes	Zurhausenvirales	Papillomaviridae	Betapapillomavirus	Betapapillomavirus 2	Human papillomavirus 120	Human papillomavirus 120	6573154	Run1	DNA	Human	10% to 50%
D-Gajarwadi-Sept1	EU410348.1	7423	3696	430	5.99519	49.7912	8.81283	Human papillomavirus type 110, complete genome	518629	Viruses	Cossaviricota	Papovaviricetes	Zurhausenvirales	Papillomaviridae	Betapapillomavirus	Betapapillomavirus 2	Human papillomavirus 110	Human papillomavirus 110	6573154	Run1	DNA	Human	10% to 50%
D-Gajarwadi-Sept1	GU233853.1	7219	3175	402	5.68723	43.9812	8.47179	Human papillomavirus type 129, complete genome	931210	Viruses	Cossaviricota	Papovaviricetes	Zurhausenvirales	Papillomaviridae	Gammapapillomavirus	Gammapapillomavirus 9	Human papillomavirus type 129	Human papillomavirus type 129	6573154	Run1	DNA	Human	10% to 50%
D-Gajarwadi-Sept1	NC_012729.2	5104	1360	282	3.21377	26.6458	8.40552	Human bocavirus 4 NI strain HBoV4-NI-385, complete genome	1511883	Viruses	Cossaviricota	Quintoviricetes	Piccovirales	Parvoviridae	Bocaparvovirus	Primate bocaparvovirus 2	Human bocavirus 4 NI	Human bocavirus 4 NI	6573154	Run1	DNA	Human	10% to 50%
D-Gajarwadi-Sept1	MF588736.1	7237	3496	398	5.80824	48.3073	8.36663	Gammapapillomavirus 22 isolate Gamma22_EV06c118, complete genome	1961679	Viruses	Cossaviricota	Papovaviricetes	Zurhausenvirales	Papillomaviridae	Gammapapillomavirus	Gammapapillomavirus 22	unclassified Gammapapillomavirus 22 subspecies/strain	unclassified Gammapapillomavirus 22 strain	6573154	Run1	DNA	Human	10% to 50%
D-Gajarwadi-Sept1	MF588782.1	4152	2253	226	5.20365	54.263	8.2809	Gammapapillomavirus 22 isolate iGamma22_m090c255 E7 (E7), E1 (E1), E2 (E2), and E4 (E4) genes, complete cds	1961679	Viruses	Cossaviricota	Papovaviricetes	Zurhausenvirales	Papillomaviridae	Gammapapillomavirus	Gammapapillomavirus 22	unclassified Gammapapillomavirus 22 subspecies/strain	unclassified Gammapapillomavirus 22 strain	6573154	Run1	DNA	Human	50% to 90%
D-Gajarwadi-Sept1	MF588758.1	7328	3152	393	5.63207	43.0131	8.15893	Gammapapillomavirus sp. isolate Gamma_w27c03a, complete genome	2049444	Viruses	Cossaviricota	Papovaviricetes	Zurhausenvirales	Papillomaviridae	Gammapapillomavirus	Gammapapillomavirus sp.	unclassified Gammapapillomavirus sp. subspecies/strain	unclassified Gammapapillomavirus sp. strain	6573154	Run1	DNA	Human	10% to 50%
D-Gajarwadi-Sept1	MF588764.1	4433	1576	237	5.78263	35.5515	8.13349	Gammapapillomavirus 9 isolate iGamma09_w27c95a E2 (E2), E4 (E4), and L2 (L2) genes, complete cds	1175851	Viruses	Cossaviricota	Papovaviricetes	Zurhausenvirales	Papillomaviridae	Gammapapillomavirus	Gammapapillomavirus 9	unclassified Gammapapillomavirus 9 subspecies/strain	unclassified Gammapapillomavirus 9 strain	6573154	Run1	DNA	Human	10% to 50%
D-Gajarwadi-Sept1	MF588737.1	7285	3345	388	5.58402	45.9163	8.10267	Gammapapillomavirus 22 isolate Gamma22_m090c145, complete genome	1961679	Viruses	Cossaviricota	Papovaviricetes	Zurhausenvirales	Papillomaviridae	Gammapapillomavirus	Gammapapillomavirus 22	unclassified Gammapapillomavirus 22 subspecies/strain	unclassified Gammapapillomavirus 22 strain	6573154	Run1	DNA	Human	10% to 50%
D-Gajarwadi-Sept1	GU989205.1	5232	2389	271	5.4817	45.6613	7.88003	Trichodysplasia spinulosa-associated polyomavirus, complete genome	862909	Viruses	Cossaviricota	Papovaviricetes	Sepolyvirales	Polyomaviridae	Alphapolyomavirus	Alphapolyomavirus octihominis	Trichodysplasia spinulosa-associated polyomavirus	Trichodysplasia spinulosa-associated polyomavirus	6573154	Run1	DNA	Human	10% to 50%
D-Gajarwadi-Sept1	X74468.1	7412	3248	367	5.26219	43.8208	7.53281	Human papillomavirus type 15 genomic DNA	10606	Viruses	Cossaviricota	Papovaviricetes	Zurhausenvirales	Papillomaviridae	Betapapillomavirus	Betapapillomavirus 2	Human papillomavirus 15	Human papillomavirus 15	6573154	Run1	DNA	Human	10% to 50%
D-Gajarwadi-Sept1	NC_045512.2	29903	10789	1477	5.13669	36.08	7.51436	Severe acute respiratory syndrome coronavirus 2 isolate Wuhan-Hu-1, complete genome	2697049	Viruses	Pisuviricota	Pisoniviricetes	Nidovirales	Coronaviridae	Betacoronavirus	Severe acute respiratory syndrome-related coronavirus	Severe acute respiratory syndrome coronavirus 2	Severe acute respiratory syndrome coronavirus 2	6573154	Run1	RNA	Human	10% to 50%
D-Gajarwadi-Sept1	MF588783.1	1506	813	74	5.59735	53.9841	7.47537	Gammapapillomavirus 22 isolate iGamma22_m815c204 E2 (E2) and E4 (E4) genes, complete cds	1961679	Viruses	Cossaviricota	Papovaviricetes	Zurhausenvirales	Papillomaviridae	Gammapapillomavirus	Gammapapillomavirus 22	unclassified Gammapapillomavirus 22 subspecies/strain	unclassified Gammapapillomavirus 22 strain	6573154	Run1	DNA	Human	50% to 90%
D-Gajarwadi-Sept1	KP692115.1	7291	2834	358	5.17491	38.8698	7.47003	Human papillomavirus type 201 isolate HPV201, complete genome	1682340	Viruses	Cossaviricota	Papovaviricetes	Zurhausenvirales	Papillomaviridae	Gammapapillomavirus	Gammapapillomavirus 27	Human papillomavirus 201	Human papillomavirus 201	6573154	Run1	DNA	Human	10% to 50%
D-Gajarwadi-Sept1	MF588704.1	7227	3100	344	5.03335	42.8947	7.24147	Gammapapillomavirus 8 isolate Gamma08_do1c232, complete genome	1175850	Viruses	Cossaviricota	Papovaviricetes	Zurhausenvirales	Papillomaviridae	Gammapapillomavirus	Gammapapillomavirus 8	unclassified Gammapapillomavirus 8 subspecies/strain	unclassified Gammapapillomavirus 8 strain	6573154	Run1	DNA	Human	10% to 50%
D-Gajarwadi-Sept1	MF588693.1	7226	3034	331	4.82674	41.9873	6.96877	Gammapapillomavirus sp. isolate Gamma_w34c04a, complete genome	2049444	Viruses	Cossaviricota	Papovaviricetes	Zurhausenvirales	Papillomaviridae	Gammapapillomavirus	Gammapapillomavirus sp.	unclassified Gammapapillomavirus sp. subspecies/strain	unclassified Gammapapillomavirus sp. strain	6573154	Run1	DNA	Human	10% to 50%
D-Gajarwadi-Sept1	Y15174.1	7549	2771	344	4.76727	36.7068	6.93259	Human papillomavirus type 76 E6, E7, E1, E2, E4, L2, and L1 genes	69985	Viruses	Cossaviricota	Papovaviricetes	Zurhausenvirales	Papillomaviridae	Betapapillomavirus	Betapapillomavirus 3	human papillomavirus 76	human papillomavirus 76	6573154	Run1	DNA	Human	10% to 50%
D-Gajarwadi-Sept1	X74464.1	7434	2904	334	5.46485	39.0638	6.83518	Human papillomavirus type 9 genomic DNA	10621	Viruses	Cossaviricota	Papovaviricetes	Zurhausenvirales	Papillomaviridae	Betapapillomavirus	Betapapillomavirus 2	Human papillomavirus 9	Human papillomavirus 9	6573154	Run1	DNA	Human	10% to 50%
D-Gajarwadi-Sept1	HM999987.1	7293	2941	325	4.70335	40.3263	6.77959	Human papillomavirus type 135 isolate NJ3500, complete genome	1070408	Viruses	Cossaviricota	Papovaviricetes	Zurhausenvirales	Papillomaviridae	Gammapapillomavirus	Gammapapillomavirus 15	Human papillomavirus 135	Human papillomavirus 135	6573154	Run1	DNA	Human	10% to 50%
D-Gajarwadi-Sept1	GU191019.1	34177	13258	1474	4.48171	38.7922	6.5613	Human adenovirus 18 isolate D.C., complete genome	10528	Viruses	Preplasmiviricota	Tectiliviricetes	Rowavirales	Adenoviridae	Mastadenovirus	Human mastadenovirus A	Human adenovirus 18	Human adenovirus 18	6573154	Run1	DNA	Human	10% to 50%
D-Gajarwadi-Sept1	U31786.1	7421	2999	318	4.48687	40.4123	6.51915	Human papillomavirus type 37, complete genome	37958	Viruses	Cossaviricota	Papovaviricetes	Zurhausenvirales	Papillomaviridae	Betapapillomavirus	Betapapillomavirus 2	Human papillomavirus 37	Human papillomavirus 37	6573154	Run1	DNA	Human	10% to 50%
D-Gajarwadi-Sept1	MF588719.1	7110	3381	304	4.55488	47.5527	6.50474	Gammapapillomavirus 12 isolate Gamma12_w23c77, complete genome	1513257	Viruses	Cossaviricota	Papovaviricetes	Zurhausenvirales	Papillomaviridae	Gammapapillomavirus	Gammapapillomavirus 12	unclassified Gammapapillomavirus 12 subspecies/strain	unclassified Gammapapillomavirus 12 strain	6573154	Run1	DNA	Human	10% to 50%
D-Gajarwadi-Sept1	JX262162.1	4939	2269	211	4.58071	45.9405	6.49935	Human polyomavirus 10 isolate 10ww, complete genome	1208309	Viruses	Cossaviricota	Papovaviricetes	Sepolyvirales	Polyomaviridae	Deltapolyomavirus	Deltapolyomavirus decihominis	unclassified Deltapolyomavirus decihominis subspecies/strain	unclassified Deltapolyomavirus decihominis strain	6573154	Run1	DNA	Human	10% to 50%
D-Gajarwadi-Sept1	KJ913662.1	7184	2610	303	4.33182	36.3307	6.41656	Human papillomavirus type 199 isolate KC82-SLO, complete genome	1545700	Viruses	Cossaviricota	Papovaviricetes	Zurhausenvirales	Papillomaviridae	Gammapapillomavirus	Gammapapillomavirus 12	Human papillomavirus 199	Human papillomavirus 199	6573154	Run1	DNA	Human	10% to 50%
D-Gajarwadi-Sept1	MF588720.1	7142	2860	299	4.43521	40.0448	6.36909	Gammapapillomavirus 12 isolate Gamma12_w34c11a, complete genome	1513257	Viruses	Cossaviricota	Papovaviricetes	Zurhausenvirales	Papillomaviridae	Gammapapillomavirus	Gammapapillomavirus 12	unclassified Gammapapillomavirus 12 subspecies/strain	unclassified Gammapapillomavirus 12 strain	6573154	Run1	DNA	Human	10% to 50%
D-Gajarwadi-Sept1	U31782.1	7452	3119	300	4.13147	41.8545	6.12456	Human papillomavirus type 24, complete genome	37956	Viruses	Cossaviricota	Papovaviricetes	Zurhausenvirales	Papillomaviridae	Betapapillomavirus	Betapapillomavirus 1	human papillomavirus 24	human papillomavirus 24	6573154	Run1	DNA	Human	10% to 50%
D-Gajarwadi-Sept1	GQ845445.1	7329	2656	267	3.83507	36.2396	5.54233	Human papillomavirus type 123, complete genome	765055	Viruses	Cossaviricota	Papovaviricetes	Zurhausenvirales	Papillomaviridae	Gammapapillomavirus	Gammapapillomavirus 7	Human papillomavirus 123	Human papillomavirus 123	6573154	Run1	DNA	Human	10% to 50%
D-Gajarwadi-Sept1	HG421739.1	7228	2429	254	3.72506	33.6054	5.34616	Human papillomavirus type 179 complete genome, isolate SIBX16	1472342	Viruses	Cossaviricota	Papovaviricetes	Zurhausenvirales	Papillomaviridae	Gammapapillomavirus	Gammapapillomavirus 15	Human papillomavirus 179	Human papillomavirus 179	6573154	Run1	DNA	Human	10% to 50%
D-Gajarwadi-Sept1	JX444073.1	7143	2218	249	3.70213	31.0514	5.30328	Human papillomavirus KC5, complete genome	1647924	Viruses	Cossaviricota	Papovaviricetes	Zurhausenvirales	Papillomaviridae	Gammapapillomavirus	Human papillomavirus KC5	unclassified Human papillomavirus KC5 subspecies/strain	unclassified Human papillomavirus KC5 strain	6573154	Run1	DNA	Human	10% to 50%
D-Gajarwadi-Sept1	HM999998.1	7265	2320	244	3.52467	31.9339	5.10952	Human papillomavirus type 146 isolate GH1677, complete genome	1070419	Viruses	Cossaviricota	Papovaviricetes	Zurhausenvirales	Papillomaviridae	Gammapapillomavirus	Gammapapillomavirus 15	Human papillomavirus 146	Human papillomavirus 146	6573154	Run1	DNA	Human	10% to 50%
D-Gajarwadi-Sept1	HM011560.1	4926	1442	164	3.54732	29.2732	5.06496	Polyomavirus HPyV6 isolate 607a, complete genome	746830	Viruses	Cossaviricota	Papovaviricetes	Sepolyvirales	Polyomaviridae	Deltapolyomavirus	Deltapolyomavirus sextihominis	Human polyomavirus 6	Human polyomavirus 6	6573154	Run1	DNA	Human	10% to 50%
D-Gajarwadi-Sept1	MF588699.1	7327	2093	240	3.48474	28.5656	4.98323	Gammapapillomavirus 7 isolate Gamma07_EV03c60, complete genome	1175849	Viruses	Cossaviricota	Papovaviricetes	Zurhausenvirales	Papillomaviridae	Gammapapillomavirus	Gammapapillomavirus 7	unclassified Gammapapillomavirus 7 subspecies/strain	unclassified Gammapapillomavirus 7 strain	6573154	Run1	DNA	Human	10% to 50%
D-Gajarwadi-Sept1	KC862318.1	7228	1887	226	3.22351	26.1068	4.75682	Human papillomavirus type 167 isolate KC10, complete genome	1420545	Viruses	Cossaviricota	Papovaviricetes	Zurhausenvirales	Papillomaviridae	Gammapapillomavirus	Gammapapillomavirus 21	Human papillomavirus 167	Human papillomavirus 167	6573154	Run1	DNA	Human	10% to 50%
D-Gajarwadi-Sept1	MF588739.1	7260	2020	226	3.35148	27.8237	4.73585	Gammapapillomavirus 22 isolate Gamma22_TVMBSWc141, complete genome	1961679	Viruses	Cossaviricota	Papovaviricetes	Zurhausenvirales	Papillomaviridae	Gammapapillomavirus	Gammapapillomavirus 22	unclassified Gammapapillomavirus 22 subspecies/strain	unclassified Gammapapillomavirus 22 strain	6573154	Run1	DNA	Human	10% to 50%
D-Gajarwadi-Sept1	KF006399.1	7203	2261	224	3.21367	31.3897	4.73109	Human papillomavirus type 172, complete genome	1434987	Viruses	Cossaviricota	Papovaviricetes	Zurhausenvirales	Papillomaviridae	Gammapapillomavirus	Gammapapillomavirus 22	Human papillomavirus 172	Human papillomavirus 172	6573154	Run1	DNA	Human	10% to 50%
D-Gajarwadi-Sept1	KR816167.1	7226	2050	224	3.18739	28.3698	4.71603	Human papillomavirus type 176 isolate PLC295, complete genome	1851122	Viruses	Cossaviricota	Papovaviricetes	Zurhausenvirales	Papillomaviridae	Gammapapillomavirus	Gammapapillomavirus 8	Human papillomavirus type 176	Human papillomavirus type 176	6573154	Run1	DNA	Human	10% to 50%
D-Gajarwadi-Sept1	MF588727.1	7221	2439	219	3.0396	33.7765	4.61395	Gammapapillomavirus 15 isolate Gamma15_wg1c09, complete genome	1513260	Viruses	Cossaviricota	Papovaviricetes	Zurhausenvirales	Papillomaviridae	Gammapapillomavirus	Gammapapillomavirus 15	unclassified Gammapapillomavirus 15 subspecies/strain	unclassified Gammapapillomavirus 15 strain	6573154	Run1	DNA	Human	10% to 50%
D-Gajarwadi-Sept1	MF588712.1	7257	2393	220	3.21852	32.9751	4.61203	Gammapapillomavirus 9 isolate Gamma09_w27c39c, complete genome	1175851	Viruses	Cossaviricota	Papovaviricetes	Zurhausenvirales	Papillomaviridae	Gammapapillomavirus	Gammapapillomavirus 9	unclassified Gammapapillomavirus 9 subspecies/strain	unclassified Gammapapillomavirus 9 strain	6573154	Run1	DNA	Human	10% to 50%
D-Gajarwadi-Sept1	EU541442.1	7227	1869	216	3.25519	25.8614	4.54697	Human papillomavirus type 112, complete genome	915427	Viruses	Cossaviricota	Papovaviricetes	Zurhausenvirales	Papillomaviridae	Gammapapillomavirus	Gammapapillomavirus 8	Human papillomavirus type 112	Human papillomavirus type 112	6573154	Run1	DNA	Human	10% to 50%
D-Gajarwadi-Sept1	J02275.1	5149	1060	152	3.13243	20.5865	4.49104	Minute virus of mice, complete genome	10794	Viruses	Cossaviricota	Quintoviricetes	Piccovirales	Parvoviridae	Protoparvovirus	Rodent protoparvovirus 1	Minute virus of mice	Minute virus of mice	6573154	Run1	DNA	Animal	10% to 50%
D-Gajarwadi-Sept1	MF588734.1	7214	1742	206	2.99335	24.1475	4.34427	Gammapapillomavirus 22 isolate Gamma22_do1c02, complete genome	1961679	Viruses	Cossaviricota	Papovaviricetes	Zurhausenvirales	Papillomaviridae	Gammapapillomavirus	Gammapapillomavirus 22	unclassified Gammapapillomavirus 22 subspecies/strain	unclassified Gammapapillomavirus 22 strain	6573154	Run1	DNA	Human	10% to 50%
D-Gajarwadi-Sept1	KR816181.1	7260	2247	204	2.95204	30.9504	4.27484	Human papillomavirus type 194 isolate ACS290, complete genome	1851219	Viruses	Cossaviricota	Papovaviricetes	Zurhausenvirales	Papillomaviridae	Gammapapillomavirus	Human papillomavirus type 194	unclassified Human papillomavirus type 194 subspecies/strain	unclassified Human papillomavirus type 194 strain	6573154	Run1	DNA	Human	10% to 50%
D-Gajarwadi-Sept1	MF588707.1	7243	2268	200	2.81602	31.313	4.20086	Gammapapillomavirus 8 isolate Gamma08_TVMBSHc33, complete genome	1175850	Viruses	Cossaviricota	Papovaviricetes	Zurhausenvirales	Papillomaviridae	Gammapapillomavirus	Gammapapillomavirus 8	unclassified Gammapapillomavirus 8 subspecies/strain	unclassified Gammapapillomavirus 8 strain	6573154	Run1	DNA	Human	10% to 50%
D-Gajarwadi-Sept1	JF906559.1	7352	2042	196	2.80853	27.7748	4.0558	Human papillomavirus 155 isolate SE42, complete genome	1165934	Viruses	Cossaviricota	Papovaviricetes	Zurhausenvirales	Papillomaviridae	Gammapapillomavirus	Gammapapillomavirus 7	Human papillomavirus 155	Human papillomavirus 155	6573154	Run1	DNA	Human	10% to 50%
D-Gajarwadi-Sept1	L32896.1	6039	1059	159	2.46154	17.536	4.00551	Galleria mellonella densovirus non-structural protein (NS) and capsid protein (VP1,VP2,VP3,VP4) genes, complete cds	37138	Viruses	Cossaviricota	Quintoviricetes	Piccovirales	Parvoviridae	Protoambidensovirus	Lepidopteran protoambidensovirus 1	Galleria mellonella densovirus	Galleria mellonella densovirus	6573154	Run1	DNA	Insect	10% to 50%
D-Gajarwadi-Sept1	FN677755.1	7436	1873	194	2.6459	25.1883	3.96907	Human papillomavirus type 150, complete genome, isolate SIBX1	743811	Viruses	Cossaviricota	Papovaviricetes	Zurhausenvirales	Papillomaviridae	Betapapillomavirus	Betapapillomavirus 5	human papillomavirus 150	human papillomavirus 150	6573154	Run1	DNA	Human	10% to 50%
D-Gajarwadi-Sept1	HE963025.1	7443	2693	193	2.67284	36.1816	3.9449	Human papillomavirus type 159 complete genome, isolate SIBX8	1209820	Viruses	Cossaviricota	Papovaviricetes	Zurhausenvirales	Papillomaviridae	Betapapillomavirus	Betapapillomavirus 2	Human papillomavirus 159	Human papillomavirus 159	6573154	Run1	DNA	Human	10% to 50%
D-Gajarwadi-Sept1	MF588742.1	7214	1586	185	2.71135	21.985	3.90141	Gammapapillomavirus 22 isolate Gamma22_w20c08a, complete genome	1961679	Viruses	Cossaviricota	Papovaviricetes	Zurhausenvirales	Papillomaviridae	Gammapapillomavirus	Gammapapillomavirus 22	unclassified Gammapapillomavirus 22 subspecies/strain	unclassified Gammapapillomavirus 22 strain	6573154	Run1	DNA	Human	10% to 50%
D-Gajarwadi-Sept1	KR816179.1	7244	1996	185	2.70961	27.5538	3.88525	Human papillomavirus 192 isolate ACS142, complete genome	1851217	Viruses	Cossaviricota	Papovaviricetes	Zurhausenvirales	Papillomaviridae	Gammapapillomavirus	Gammapapillomavirus 15	Human papillomavirus 192	Human papillomavirus 192	6573154	Run1	DNA	Human	10% to 50%
D-Gajarwadi-Sept1	JX413106.1	7233	1715	181	2.61146	23.7108	3.80703	Human papillomavirus type 164 isolate KC4, complete genome	1315261	Viruses	Cossaviricota	Papovaviricetes	Zurhausenvirales	Papillomaviridae	Gammapapillomavirus	Gammapapillomavirus 8	human papillomavirus 164	human papillomavirus 164	6573154	Run1	DNA	Human	10% to 50%
D-Gajarwadi-Sept1	GU117634.1	7309	2016	180	2.63417	27.5824	3.74663	Human papillomavirus type 134, complete genome	909333	Viruses	Cossaviricota	Papovaviricetes	Zurhausenvirales	Papillomaviridae	Gammapapillomavirus	Gammapapillomavirus 7	Human papillomavirus 134	Human papillomavirus 134	6573154	Run1	DNA	Human	10% to 50%
D-Gajarwadi-Sept1	AF192260.1	5454	1023	126	2.3569	18.7569	3.51465	Periplaneta fuliginosa densovirus, complete genome	97344	Viruses	Cossaviricota	Quintoviricetes	Piccovirales	Parvoviridae	Pefuambidensovirus	Blattodean pefuambidensovirus 1	Periplaneta fuliginosa densovirus	Periplaneta fuliginosa densovirus	6573154	Run1	DNA	Insect	10% to 50%
D-Gajarwadi-Sept1	MF588741.1	7201	1818	164	2.42207	25.2465	3.46479	Gammapapillomavirus 22 isolate Gamma22_w18c39, complete genome	1961679	Viruses	Cossaviricota	Papovaviricetes	Zurhausenvirales	Papillomaviridae	Gammapapillomavirus	Gammapapillomavirus 22	unclassified Gammapapillomavirus 22 subspecies/strain	unclassified Gammapapillomavirus 22 strain	6573154	Run1	DNA	Human	10% to 50%
D-Gajarwadi-Sept1	X74469.1	7427	2062	165	2.35014	27.7636	3.37984	Human papillomavirus type 17 genomic DNA	10607	Viruses	Cossaviricota	Papovaviricetes	Zurhausenvirales	Papillomaviridae	Betapapillomavirus	Betapapillomavirus 2	Human papillomavirus 17	Human papillomavirus 17	6573154	Run1	DNA	Human	10% to 50%
D-Gajarwadi-Sept1	HM999994.1	7374	1758	159	2.17566	23.8405	3.28035	Human papillomavirus type 142 isolate GH1302, complete genome	1070415	Viruses	Cossaviricota	Papovaviricetes	Zurhausenvirales	Papillomaviridae	Gammapapillomavirus	Gammapapillomavirus 10	Human papillomavirus 142	Human papillomavirus 142	6573154	Run1	DNA	Human	10% to 50%
D-Gajarwadi-Sept1	MF588730.1	7292	1859	156	2.23957	25.4937	3.25465	Gammapapillomavirus 18 isolate Gamma18_EV07c385, complete genome	1513263	Viruses	Cossaviricota	Papovaviricetes	Zurhausenvirales	Papillomaviridae	Gammapapillomavirus	Gammapapillomavirus 18	unclassified Gammapapillomavirus 18 subspecies/strain	unclassified Gammapapillomavirus 18 strain	6573154	Run1	DNA	Human	10% to 50%
D-Gajarwadi-Sept1	MF588705.1	7298	1480	154	2.23559	20.2795	3.21028	Gammapapillomavirus 8 isolate Gamma08_EV07c390, complete genome	1175850	Viruses	Cossaviricota	Papovaviricetes	Zurhausenvirales	Papillomaviridae	Gammapapillomavirus	Gammapapillomavirus 8	unclassified Gammapapillomavirus 8 subspecies/strain	unclassified Gammapapillomavirus 8 strain	6573154	Run1	DNA	Human	10% to 50%
D-Gajarwadi-Sept1	KR816169.1	7240	1336	140	2.0536	18.453	2.94182	Human papillomavirus 181 isolate ACS217, complete genome	1851124	Viruses	Cossaviricota	Papovaviricetes	Zurhausenvirales	Papillomaviridae	Gammapapillomavirus	Gammapapillomavirus 11	Human papillomavirus 181	Human papillomavirus 181	6573154	Run1	DNA	Human	10% to 50%
D-Gajarwadi-Sept1	MF588738.1	7309	1018	140	2.06076	13.928	2.91405	Gammapapillomavirus 22 isolate Gamma22_TVMBSHc13, complete genome	1961679	Viruses	Cossaviricota	Papovaviricetes	Zurhausenvirales	Papillomaviridae	Gammapapillomavirus	Gammapapillomavirus 22	unclassified Gammapapillomavirus 22 subspecies/strain	unclassified Gammapapillomavirus 22 strain	6573154	Run1	DNA	Human	10% to 50%
D-Gajarwadi-Sept1	MF588735.1	7231	1221	137	2.07796	16.8856	2.88236	Gammapapillomavirus 22 isolate Gamma22_EV03c212, complete genome	1961679	Viruses	Cossaviricota	Papovaviricetes	Zurhausenvirales	Papillomaviridae	Gammapapillomavirus	Gammapapillomavirus 22	unclassified Gammapapillomavirus 22 subspecies/strain	unclassified Gammapapillomavirus 22 strain	6573154	Run1	DNA	Human	10% to 50%
D-Gajarwadi-Sept1	MF588731.1	7236	1523	136	1.9825	21.0475	2.85934	Gammapapillomavirus 18 isolate Gamma18_w34c34a, complete genome	1513263	Viruses	Cossaviricota	Papovaviricetes	Zurhausenvirales	Papillomaviridae	Gammapapillomavirus	Gammapapillomavirus 18	unclassified Gammapapillomavirus 18 subspecies/strain	unclassified Gammapapillomavirus 18 strain	6573154	Run1	DNA	Human	10% to 50%
D-Gajarwadi-Sept1	MF588743.1	7217	1277	132	1.91595	17.6943	2.78255	Gammapapillomavirus 22 isolate Gamma22_w21c693, complete genome	1961679	Viruses	Cossaviricota	Papovaviricetes	Zurhausenvirales	Papillomaviridae	Gammapapillomavirus	Gammapapillomavirus 22	unclassified Gammapapillomavirus 22 subspecies/strain	unclassified Gammapapillomavirus 22 strain	6573154	Run1	DNA	Human	10% to 50%
D-Gajarwadi-Sept1	JX413105.1	7252	1503	131	1.87187	20.7253	2.74815	Human papillomavirus type 169 isolate KC6, complete genome	1315260	Viruses	Cossaviricota	Papovaviricetes	Zurhausenvirales	Papillomaviridae	Gammapapillomavirus	Gammapapillomavirus 11	Human papillomavirus 169	Human papillomavirus 169	6573154	Run1	DNA	Human	10% to 50%
D-Gajarwadi-Sept1	KR816174.1	7268	1136	127	1.90728	15.6302	2.65837	Human papillomavirus 187 isolate ACS447, complete genome	1851130	Viruses	Cossaviricota	Papovaviricetes	Zurhausenvirales	Papillomaviridae	Gammapapillomavirus	Gammapapillomavirus 26	Human papillomavirus 187	Human papillomavirus 187	6573154	Run1	DNA	Human	10% to 50%
D-Gajarwadi-Sept1	JX444072.1	7129	1229	115	1.69079	17.2394	2.45412	Human papillomavirus type 165 isolate KC7, complete genome	1315266	Viruses	Cossaviricota	Papovaviricetes	Zurhausenvirales	Papillomaviridae	Gammapapillomavirus	Gammapapillomavirus 12	Human papillomavirus 165	Human papillomavirus 165	6573154	Run1	DNA	Human	10% to 50%
D-Gajarwadi-Sept1	HM049560.1	35203	2301	538	1.59581	6.53637	2.32503	Murine adenovirus 2 isolate K87, complete genome	931972	Viruses	Preplasmiviricota	Tectiliviricetes	Rowavirales	Adenoviridae	Mastadenovirus	Murine mastadenovirus B	Murine adenovirus 2	Murine adenovirus 2	6573154	Run1	DNA	Animal	LESS
D-Gajarwadi-Sept1	MF588747.1	7298	1165	104	1.52098	15.9633	2.16798	Gammapapillomavirus 24 isolate Gamma24_EV06c107, complete genome	1961681	Viruses	Cossaviricota	Papovaviricetes	Zurhausenvirales	Papillomaviridae	Gammapapillomavirus	Gammapapillomavirus 24	unclassified Gammapapillomavirus 24 subspecies/strain	unclassified Gammapapillomavirus 24 strain	6573154	Run1	DNA	Human	10% to 50%
D-Gajarwadi-Sept1	MT783416.1	7825	1062	111	1.48143	13.5719	2.15807	Human papillomavirus 56 strain kyd-s0256, complete genome	10596	Viruses	Cossaviricota	Papovaviricetes	Zurhausenvirales	Papillomaviridae	Alphapapillomavirus	Alphapapillomavirus 6	human papillomavirus 56	human papillomavirus 56	6573154	Run1	DNA	Human	10% to 50%
D-Gajarwadi-Sept1	MF588753.1	7350	1089	102	1.47083	14.8163	2.11125	Gammapapillomavirus sp. isolate GammaDyskD_w07c34d, complete genome	2049444	Viruses	Cossaviricota	Papovaviricetes	Zurhausenvirales	Papillomaviridae	Gammapapillomavirus	Gammapapillomavirus sp.	unclassified Gammapapillomavirus sp. subspecies/strain	unclassified Gammapapillomavirus sp. strain	6573154	Run1	DNA	Human	10% to 50%
D-Gajarwadi-Sept1	AC_000008.1	35938	5990	498	1.44833	16.6676	2.10815	Human adenovirus 5, complete genome	28285	Viruses	Preplasmiviricota	Tectiliviricetes	Rowavirales	Adenoviridae	Mastadenovirus	Human mastadenovirus C	Human adenovirus 5	Human adenovirus 5	6573154	Run1	DNA	Human	10% to 50%
D-Gajarwadi-Sept1	MF588718.1	7142	1359	98	1.45366	19.0283	2.08753	Gammapapillomavirus 12 isolate Gamma12_w11c13, complete genome	1513257	Viruses	Cossaviricota	Papovaviricetes	Zurhausenvirales	Papillomaviridae	Gammapapillomavirus	Gammapapillomavirus 12	unclassified Gammapapillomavirus 12 subspecies/strain	unclassified Gammapapillomavirus 12 strain	6573154	Run1	DNA	Human	10% to 50%
D-Gajarwadi-Sept1	MF588755.1	7282	1523	99	1.44602	20.9146	2.06829	Gammapapillomavirus sp. isolate GammaiCH2_EV03c434, complete genome	2049444	Viruses	Cossaviricota	Papovaviricetes	Zurhausenvirales	Papillomaviridae	Gammapapillomavirus	Gammapapillomavirus sp.	unclassified Gammapapillomavirus sp. subspecies/strain	unclassified Gammapapillomavirus sp. strain	6573154	Run1	DNA	Human	10% to 50%
D-Gajarwadi-Sept1	MF588715.1	7252	1027	97	1.41974	14.1616	2.03489	Gammapapillomavirus 11 isolate Gamma11_w20c03a, complete genome	1513256	Viruses	Cossaviricota	Papovaviricetes	Zurhausenvirales	Papillomaviridae	Gammapapillomavirus	Gammapapillomavirus 11	unclassified Gammapapillomavirus 11 subspecies/strain	unclassified Gammapapillomavirus 11 strain	6573154	Run1	DNA	Human	10% to 50%
D-Gajarwadi-Sept1	MF588708.1	7273	1041	95	1.3973	14.3132	1.98718	Gammapapillomavirus 8 isolate Gamma08_w20c01b, complete genome	1175850	Viruses	Cossaviricota	Papovaviricetes	Zurhausenvirales	Papillomaviridae	Gammapapillomavirus	Gammapapillomavirus 8	unclassified Gammapapillomavirus 8 subspecies/strain	unclassified Gammapapillomavirus 8 strain	6573154	Run1	DNA	Human	10% to 50%
D-Gajarwadi-Sept1	KP692114.1	7137	1022	90	1.37627	14.3197	1.91846	Human papillomavirus type 200 isolate HPV200, complete genome	1682339	Viruses	Cossaviricota	Papovaviricetes	Zurhausenvirales	Papillomaviridae	Gammapapillomavirus	Gammapapillomavirus 2	human papillomavirus 200	human papillomavirus 200	6573154	Run1	DNA	Human	10% to 50%
D-Gajarwadi-Sept1	GU117630.1	7388	1141	92	1.3186	15.444	1.89447	Human papillomavirus type 130, complete genome	909329	Viruses	Cossaviricota	Papovaviricetes	Zurhausenvirales	Papillomaviridae	Gammapapillomavirus	Gammapapillomavirus 10	Human papillomavirus 130	Human papillomavirus 130	6573154	Run1	DNA	Human	10% to 50%
D-Gajarwadi-Sept1	FJ025909.1	35592	3150	389	1.11058	8.8503	1.66274	Simian adenovirus 27.1, complete genome	585083	Viruses	Preplasmiviricota	Tectiliviricetes	Rowavirales	Adenoviridae	Mastadenovirus	Human mastadenovirus B	Simian adenovirus 27.1	Simian adenovirus 27.1	6573154	Run1	DNA	Animal	LESS
D-Gajarwadi-Sept1	MF588689.1	7191	1112	71	1.04701	15.4638	1.50209	Gammapapillomavirus sp. isolate Gamma_w11C51, complete genome	2049444	Viruses	Cossaviricota	Papovaviricetes	Zurhausenvirales	Papillomaviridae	Gammapapillomavirus	Gammapapillomavirus sp.	unclassified Gammapapillomavirus sp. subspecies/strain	unclassified Gammapapillomavirus sp. strain	6573154	Run1	DNA	Human	10% to 50%
D-Gajarwadi-Sept1	AY382779.2	7438	1042	68	0.992453	14.0091	1.39085	Human papillomavirus type 96, complete genome	247269	Viruses	Cossaviricota	Papovaviricetes	Zurhausenvirales	Papillomaviridae	Betapapillomavirus	Betapapillomavirus 5	Human papillomavirus type 96	Human papillomavirus type 96	6573154	Run1	DNA	Human	10% to 50%
D-Gajarwadi-Sept1	KT698166.1	7154	1062	50	0.712878	14.8448	1.06328	Human papillomavirus 157, complete genome	2259331	Viruses	Cossaviricota	Papovaviricetes	Zurhausenvirales	Papillomaviridae	Gammapapillomavirus	Gammapapillomavirus 12	Human papillomavirus 157	Human papillomavirus 157	6573154	Run1	DNA	Human	10% to 50%
D-Gajarwadi-Sept1	FJ025927.1	35767	2945	235	0.626134	8.23385	0.999566	Simian adenovirus 41.2, complete genome	585096	Viruses	Preplasmiviricota	Tectiliviricetes	Rowavirales	Adenoviridae	Mastadenovirus	Human mastadenovirus B	Simian adenovirus 41.2	Simian adenovirus 41.2	6573154	Run1	DNA	Animal	LESS
D-Gajarwadi-Sept1	BK000400.1	33034	2248	178	0.572132	6.80511	0.819757	TPA: Bovine adenovirus 2, complete genome	NA	Viruses	Preplasmiviricota	Tectiliviricetes	Rowavirales	Adenoviridae	Mastadenovirus	Mastadenovirus bovidae	Bovine adenovirus	Bovine adenovirus 2	6573154	Run1	DNA	Animal	LESS
D-Gajarwadi-Sept1	KX121164.1	41981	1913	211	0.511702	4.55682	0.764638	Pigeon adenovirus 2 isolate YPDS-Y-V1.A19.11-2013, complete genome	1907767	Viruses	Preplasmiviricota	Tectiliviricetes	Rowavirales	Adenoviridae	Aviadenovirus	Pigeon aviadenovirus B	Pigeon adenovirus 2	Pigeon adenovirus 2	6573154	Run1	DNA	Animal	LESS
D-Gajarwadi-Sept1	MG712775.1	44454	1607	151	0.368567	3.61497	0.516764	Fowl adenovirus 8b isolate SD1356, complete genome	586029	Viruses	Preplasmiviricota	Tectiliviricetes	Rowavirales	Adenoviridae	Aviadenovirus	Fowl aviadenovirus E	Fowl adenovirus 8b	Fowl adenovirus 8b	6573154	Run1	DNA	Animal	LESS
D-Gajarwadi-Sept1	NC_007653.1	156487	1010	402	0.798052	0.645421	0.390817	Papiine herpesvirus 2, complete genome	340907	Viruses	Peploviricota	Herviviricetes	Herpesvirales	Herpesviridae	Simplexvirus	Papiine alphaherpesvirus 2	unclassified Papiine alphaherpesvirus 2 subspecies/strain	unclassified Papiine alphaherpesvirus 2 strain	6573154	Run1	DNA	Animal	LESS
D-Gajarwadi-Sept1	AC_000007.1	35937	2067	84	0.233688	5.75173	0.355602	Human adenovirus 2, complete genome	10515	Viruses	Preplasmiviricota	Tectiliviricetes	Rowavirales	Adenoviridae	Mastadenovirus	Human mastadenovirus C	Human adenovirus 2	Human adenovirus 2	6573154	Run1	DNA	Human	LESS
D-Gajarwadi-Sept1	FJ349096.1	35758	1914	51	0.144153	5.35265	0.216982	Human adenovirus 6 strain Tonsil 99 prototype, complete genome	10534	Viruses	Preplasmiviricota	Tectiliviricetes	Rowavirales	Adenoviridae	Mastadenovirus	Human mastadenovirus C	Human adenovirus 6	Human adenovirus 6	6573154	Run1	DNA	Human	LESS
D-Gajarwadi-Sept1	AC_000017.1	36001	1772	44	0.128114	4.92209	0.185936	Human adenovirus type 1, complete genome	10533	Viruses	Preplasmiviricota	Tectiliviricetes	Rowavirales	Adenoviridae	Mastadenovirus	Human mastadenovirus C	Human adenovirus 1	Human adenovirus 1	6573154	Run1	DNA	Human	LESS
D-Gajarwadi-Sept2	J02226.1	5130	5061	7136	148.894	98.655	73.1141	JC virus complete genome	10632	Viruses	Cossaviricota	Papovaviricetes	Sepolyvirales	Polyomaviridae	Betapolyomavirus	Betapolyomavirus secuhominis	JC polyomavirus	JC polyomavirus	19025504	Run1	DNA	Human	Over 90%
D-Gajarwadi-Sept2	JQ326209.1	35153	33334	41282	122.062	94.8255	61.7252	Human adenovirus 19, complete genome	28278	Viruses	Preplasmiviricota	Tectiliviricetes	Rowavirales	Adenoviridae	Mastadenovirus	Human mastadenovirus D	Human adenovirus 19	Human adenovirus 19	19025504	Run1	DNA	Human	Over 90%
D-Gajarwadi-Sept2	L19443.1	34214	33783	27295	82.6242	98.7403	41.9318	Human adenovirus F, complete genome	130309	Viruses	Preplasmiviricota	Tectiliviricetes	Rowavirales	Adenoviridae	Mastadenovirus	Human mastadenovirus F	unclassified Human mastadenovirus F subspecies/strain	unclassified Human mastadenovirus F strain	19025504	Run1	DNA	Human	Over 90%
D-Gajarwadi-Sept2	AF108105.1	35100	30379	27771	82.7502	86.5499	41.5861	Human adenovirus type 17 complete genome	46922	Viruses	Preplasmiviricota	Tectiliviricetes	Rowavirales	Adenoviridae	Mastadenovirus	Human mastadenovirus D	Human adenovirus 17	Human adenovirus 17	19025504	Run1	DNA	Human	50% to 90%
D-Gajarwadi-Sept2	AB448776.1	35215	32099	26903	79.5997	91.1515	40.1547	Human adenovirus 37 genomic DNA, complete genome, isolate: 1991	52275	Viruses	Preplasmiviricota	Tectiliviricetes	Rowavirales	Adenoviridae	Mastadenovirus	Human mastadenovirus D	Human adenovirus D37	Human adenovirus D37	19025504	Run1	DNA	Human	Over 90%
D-Gajarwadi-Sept2	KY316160.1	34169	32969	22572	68.1174	96.488	34.7217	Human adenovirus 41 isolate SH/2015/D16, complete genome	10524	Viruses	Preplasmiviricota	Tectiliviricetes	Rowavirales	Adenoviridae	Mastadenovirus	Human mastadenovirus F	Human adenovirus 41	Human adenovirus 41	19025504	Run1	DNA	Human	Over 90%
D-Gajarwadi-Sept2	EU233812.1	4139	2981	2236	58.2763	72.0222	28.3949	Anopheles gambiae densonucleosis virus, complete genome	487311	Viruses	Cossaviricota	Quintoviricetes	Piccovirales	Parvoviridae	Brevihamaparvovirus	Dipteran brevihamaparvovirus 1	Anopheles gambiae densovirus	Anopheles gambiae densovirus	19025504	Run1	DNA	Insect	50% to 90%
D-Gajarwadi-Sept2	M19296.1	5323	2513	2402	47.643	47.2102	23.7181	Canine parvovirus strain CPV-N, complete cds	10788	Viruses	Cossaviricota	Quintoviricetes	Piccovirales	Parvoviridae	Protoparvovirus	Carnivore protoparvovirus 1	Canine parvovirus	Canine parvovirus	19025504	Run1	DNA	Animal	10% to 50%
D-Gajarwadi-Sept2	V01108.1	5153	4935	2220	46.055	95.7695	22.6442	Human BK virus (strain Dunlop) genome. (Closely related to SV40.)	1891762	Viruses	Cossaviricota	Papovaviricetes	Sepolyvirales	Polyomaviridae	Betapolyomavirus	Betapolyomavirus hominis	unclassified Betapolyomavirus hominis subspecies/strain	unclassified Betapolyomavirus hominis strain	19025504	Run1	DNA	Human	Over 90%
D-Gajarwadi-Sept2	KX868289.2	33676	31329	8442	26.1672	93.0306	13.1762	Human adenovirus 12 isolate GyK010, complete genome	28282	Viruses	Preplasmiviricota	Tectiliviricetes	Rowavirales	Adenoviridae	Mastadenovirus	Human mastadenovirus A	Human adenovirus 12	Human adenovirus 12	19025504	Run1	DNA	Human	Over 90%
D-Gajarwadi-Sept2	NC_045512.2	29903	22413	5461	18.983	74.9523	9.5989	Severe acute respiratory syndrome coronavirus 2 isolate Wuhan-Hu-1, complete genome	2697049	Viruses	Pisuviricota	Pisoniviricetes	Nidovirales	Coronaviridae	Betacoronavirus	Severe acute respiratory syndrome-related coronavirus	Severe acute respiratory syndrome coronavirus 2	Severe acute respiratory syndrome coronavirus 2	19025504	Run1	RNA	Human	50% to 90%
D-Gajarwadi-Sept2	AB746853.1	34978	17922	4344	12.7296	51.2379	6.52768	Human adenovirus 8 DNA, complete genome, strain: Trim variant	31545	Viruses	Preplasmiviricota	Tectiliviricetes	Rowavirales	Adenoviridae	Mastadenovirus	Human mastadenovirus D	Human adenovirus D8	Human adenovirus D8	19025504	Run1	DNA	Human	50% to 90%
D-Gajarwadi-Sept2	HM011556.1	5387	2967	641	12.5093	55.077	6.25424	Merkel cell polyomavirus isolate R17b, complete genome	493803	Viruses	Cossaviricota	Papovaviricetes	Sepolyvirales	Polyomaviridae	Alphapolyomavirus	Alphapolyomavirus quintihominis	Merkel cell polyomavirus	Merkel cell polyomavirus	19025504	Run1	DNA	Human	50% to 90%
D-Gajarwadi-Sept2	JN860680.1	35384	23548	3515	10.2718	66.5499	5.22134	Human adenovirus 16 strain E26, complete genome	31544	Viruses	Preplasmiviricota	Tectiliviricetes	Rowavirales	Adenoviridae	Mastadenovirus	Human mastadenovirus B	Human adenovirus 16	Human adenovirus 16	19025504	Run1	DNA	Human	50% to 90%
D-Gajarwadi-Sept2	AF043303.1	4679	2390	294	6.61382	51.0793	3.30262	Adeno-associated virus 2, complete genome	10804	Viruses	Cossaviricota	Quintoviricetes	Piccovirales	Parvoviridae	Dependoparvovirus	Adeno-associated dependoparvovirus A	adeno-associated virus 2	adeno-associated virus 2	19025504	Run1	DNA	Human	50% to 90%
D-Gajarwadi-Sept2	KY489985.1	5200	1359	317	6.66139	26.1346	3.2042	Porcine bocavirus 1 isolate JOA_011, complete genome	1048219	Viruses	Cossaviricota	Quintoviricetes	Piccovirales	Parvoviridae	Bocaparvovirus	Ungulate bocaparvovirus 2	Porcine bocavirus 1	Porcine bocavirus 1	19025504	Run1	DNA	Animal	10% to 50%
D-Gajarwadi-Sept2	AM749299.1	33763	16294	1954	6.03454	48.2599	3.04192	Human adenovirus type 31 complete genome, serotype 31	10529	Viruses	Preplasmiviricota	Tectiliviricetes	Rowavirales	Adenoviridae	Mastadenovirus	Human mastadenovirus A	Human adenovirus 31	Human adenovirus 31	19025504	Run1	DNA	Human	10% to 50%
D-Gajarwadi-Sept2	X70828.1	7348	3531	412	6.03515	48.0539	2.94708	Human papillomavirus type 63 complete genome	28311	Viruses	Cossaviricota	Papovaviricetes	Zurhausenvirales	Papillomaviridae	Mupapillomavirus	Mupapillomavirus 2	Human papillomavirus type 63	Human papillomavirus type 63	19025504	Run1	DNA	Human	10% to 50%
D-Gajarwadi-Sept2	X70829.1	7308	3371	382	5.51383	46.1275	2.74744	Human papillomavirus type 65 complete genome	28312	Viruses	Cossaviricota	Papovaviricetes	Zurhausenvirales	Papillomaviridae	Gammapapillomavirus	Gammapapillomavirus 1	Human papillomavirus 65	Human papillomavirus 65	19025504	Run1	DNA	Human	10% to 50%
D-Gajarwadi-Sept2	NC_012042.1	5196	2036	249	4.47939	39.184	2.5188	Human bocavirus 2c PK isolate PK-5510, complete genome	1511882	Viruses	Cossaviricota	Quintoviricetes	Piccovirales	Parvoviridae	Bocaparvovirus	Primate bocaparvovirus 2	Human bocavirus 2c PK	Human bocavirus 2c PK	19025504	Run1	DNA	Human	10% to 50%
D-Gajarwadi-Sept2	MF502426.1	35341	15290	1691	4.90057	43.2642	2.51495	Human adenovirus 21 isolate OHT-006, complete genome	32608	Viruses	Preplasmiviricota	Tectiliviricetes	Rowavirales	Adenoviridae	Mastadenovirus	Human mastadenovirus B	Human adenovirus 21	Human adenovirus 21	19025504	Run1	DNA	Human	10% to 50%
D-Gajarwadi-Sept2	NC_001802.1	9181	1868	419	4.83235	20.3464	2.39877	Human immunodeficiency virus 1, complete genome	11676	Viruses	Artverviricota	Revtraviricetes	Ortervirales	Retroviridae	Lentivirus	Human immunodeficiency virus 1	unclassified Human immunodeficiency virus 1 subspecies/strain	unclassified Human immunodeficiency virus 1 strain	19025504	Run1	RNA	Human	10% to 50%
D-Gajarwadi-Sept2	NC_012564.1	5242	2042	193	3.60271	38.9546	1.93519	Human bocavirus 3, complete genome	638313	Viruses	Cossaviricota	Quintoviricetes	Piccovirales	Parvoviridae	Bocaparvovirus	Primate bocaparvovirus 1	Human bocavirus 3	Human bocavirus 3	19025504	Run1	DNA	Human	10% to 50%
D-Gajarwadi-Sept2	HM999999.1	7224	2610	223	3.23975	36.1296	1.62252	Human papillomavirus type 147 isolate GH659, complete genome	1070420	Viruses	Cossaviricota	Papovaviricetes	Zurhausenvirales	Papillomaviridae	Gammapapillomavirus	Gammapapillomavirus 8	human papillomavirus 147	human papillomavirus 147	19025504	Run1	DNA	Human	10% to 50%
D-Gajarwadi-Sept2	NC_001356.1	7815	2798	225	3.01357	35.8029	1.51327	Human papillomavirus - 1, complete genome	334203	Viruses	Cossaviricota	Papovaviricetes	Zurhausenvirales	Papillomaviridae	Mupapillomavirus	Mupapillomavirus 1	unclassified Mupapillomavirus 1 subspecies/strain	unclassified Mupapillomavirus 1 strain	19025504	Run1	DNA	Human	10% to 50%
D-Gajarwadi-Sept2	HF930491.1	7359	1560	189	2.77056	21.1985	1.34992	Human papillomavirus type 174 complete genome, isolate V001	1347832	Viruses	Cossaviricota	Papovaviricetes	Zurhausenvirales	Papillomaviridae	Betapapillomavirus	Betapapillomavirus 2	Human papillomavirus 174	Human papillomavirus 174	19025504	Run1	DNA	Human	10% to 50%
D-Gajarwadi-Sept2	MT505439.1	34777	7615	860	2.5498	21.8967	1.29978	Human adenovirus 11 strain HAdV-B2/USA_GA/8348/2019/P11H11F12, complete genome	10541	Viruses	Preplasmiviricota	Tectiliviricetes	Rowavirales	Adenoviridae	Mastadenovirus	Human mastadenovirus B	Human adenovirus 11	Human adenovirus 11	19025504	Run1	DNA	Human	10% to 50%
D-Gajarwadi-Sept2	FJ973560.1	4958	1038	122	2.36377	20.9359	1.29335	Human bocavirus 2b NI strain HBoV2B-NI-213, complete genome	1511881	Viruses	Cossaviricota	Quintoviricetes	Piccovirales	Parvoviridae	Bocaparvovirus	Primate bocaparvovirus 2	Human bocavirus 2b NI	Human bocavirus 2b NI	19025504	Run1	DNA	Human	10% to 50%
D-Gajarwadi-Sept2	X74464.1	7434	1599	180	2.5891	21.5093	1.27266	Human papillomavirus type 9 genomic DNA	10621	Viruses	Cossaviricota	Papovaviricetes	Zurhausenvirales	Papillomaviridae	Betapapillomavirus	Betapapillomavirus 2	Human papillomavirus 9	Human papillomavirus 9	19025504	Run1	DNA	Human	10% to 50%
D-Gajarwadi-Sept2	GU191019.1	34177	5404	712	2.17533	15.8118	1.09499	Human adenovirus 18 isolate D.C., complete genome	10528	Viruses	Preplasmiviricota	Tectiliviricetes	Rowavirales	Adenoviridae	Mastadenovirus	Human mastadenovirus A	Human adenovirus 18	Human adenovirus 18	19025504	Run1	DNA	Human	10% to 50%
D-Gajarwadi-Sept2	MF588745.1	7193	1834	140	1.98722	25.497	1.02301	Gammapapillomavirus 23 isolate Gamma23_m090c10, complete genome	1961680	Viruses	Cossaviricota	Papovaviricetes	Zurhausenvirales	Papillomaviridae	Gammapapillomavirus	Gammapapillomavirus 23	unclassified Gammapapillomavirus 23 subspecies/strain	unclassified Gammapapillomavirus 23 strain	19025504	Run1	DNA	Human	10% to 50%
D-Gajarwadi-Sept2	HM011560.1	4926	1210	89	1.88882	24.5635	0.949641	Polyomavirus HPyV6 isolate 607a, complete genome	746830	Viruses	Cossaviricota	Papovaviricetes	Sepolyvirales	Polyomaviridae	Deltapolyomavirus	Deltapolyomavirus sextihominis	Human polyomavirus 6	Human polyomavirus 6	19025504	Run1	DNA	Human	10% to 50%
D-Gajarwadi-Sept2	HM999987.1	7293	1132	130	1.88492	15.5217	0.936917	Human papillomavirus type 135 isolate NJ3500, complete genome	1070408	Viruses	Cossaviricota	Papovaviricetes	Zurhausenvirales	Papillomaviridae	Gammapapillomavirus	Gammapapillomavirus 15	Human papillomavirus 135	Human papillomavirus 135	19025504	Run1	DNA	Human	10% to 50%
D-Gajarwadi-Sept2	FJ947080.1	7476	1195	128	1.75007	15.9845	0.899921	Human papillomavirus type 115 isolate GC02, complete genome	696746	Viruses	Cossaviricota	Papovaviricetes	Zurhausenvirales	Papillomaviridae	Betapapillomavirus	Betapapillomavirus 3	human papillomavirus 115	human papillomavirus 115	19025504	Run1	DNA	Human	10% to 50%
D-Gajarwadi-Sept2	AC_000008.1	35938	6491	470	1.35917	18.0617	0.687397	Human adenovirus 5, complete genome	28285	Viruses	Preplasmiviricota	Tectiliviricetes	Rowavirales	Adenoviridae	Mastadenovirus	Human mastadenovirus C	Human adenovirus 5	Human adenovirus 5	19025504	Run1	DNA	Human	10% to 50%
D-Gajarwadi-Sept2	AC_000017.1	36001	5823	437	1.25924	16.1746	0.638015	Human adenovirus type 1, complete genome	10533	Viruses	Preplasmiviricota	Tectiliviricetes	Rowavirales	Adenoviridae	Mastadenovirus	Human mastadenovirus C	Human adenovirus 1	Human adenovirus 1	19025504	Run1	DNA	Human	10% to 50%
D-Gajarwadi-Sept2	MF588734.1	7214	1089	73	1.06753	15.0956	0.531876	Gammapapillomavirus 22 isolate Gamma22_do1c02, complete genome	1961679	Viruses	Cossaviricota	Papovaviricetes	Zurhausenvirales	Papillomaviridae	Gammapapillomavirus	Gammapapillomavirus 22	unclassified Gammapapillomavirus 22 subspecies/strain	unclassified Gammapapillomavirus 22 strain	19025504	Run1	DNA	Human	10% to 50%
D-Gajarwadi-Sept2	AC_000007.1	35937	6048	356	1.00478	16.8295	0.520681	Human adenovirus 2, complete genome	10515	Viruses	Preplasmiviricota	Tectiliviricetes	Rowavirales	Adenoviridae	Mastadenovirus	Human mastadenovirus C	Human adenovirus 2	Human adenovirus 2	19025504	Run1	DNA	Human	10% to 50%
D-Gajarwadi-Sept2	AF083975.2	45063	4815	443	1.02316	10.685	0.516711	Fowl adenovirus 9, complete genome	172864	Viruses	Preplasmiviricota	Tectiliviricetes	Rowavirales	Adenoviridae	Aviadenovirus	Fowl aviadenovirus D	Fowl adenovirus 9	Fowl adenovirus 9	19025504	Run1	DNA	Animal	10% to 50%
D-Gajarwadi-Sept2	U31790.1	7184	1182	69	0.960193	16.4532	0.504832	Human papillomavirus type 50, complete genome	40539	Viruses	Cossaviricota	Papovaviricetes	Zurhausenvirales	Papillomaviridae	Gammapapillomavirus	Gammapapillomavirus 3	Human papillomavirus type 50	Human papillomavirus type 50	19025504	Run1	DNA	Human	10% to 50%
D-Gajarwadi-Sept2	MG712775.1	44454	3440	259	0.59972	7.73834	0.306234	Fowl adenovirus 8b isolate SD1356, complete genome	586029	Viruses	Preplasmiviricota	Tectiliviricetes	Rowavirales	Adenoviridae	Aviadenovirus	Fowl aviadenovirus E	Fowl adenovirus 8b	Fowl adenovirus 8b	19025504	Run1	DNA	Animal	LESS
D-Gajarwadi-Sept2	BK000400.1	33034	1633	112	0.365771	4.94339	0.178205	TPA: Bovine adenovirus 2, complete genome	NA	Viruses	Preplasmiviricota	Tectiliviricetes	Rowavirales	Adenoviridae	Mastadenovirus	Mastadenovirus bovidae	Bovine adenovirus	Bovine adenovirus 2	19025504	Run1	DNA	Animal	LESS
D-Jamalpur-Sept1	J02226.1	5130	5090	155116	3227.88	99.2203	4266.9	JC virus complete genome	10632	Viruses	Cossaviricota	Papovaviricetes	Sepolyvirales	Polyomaviridae	Betapolyomavirus	Betapolyomavirus secuhominis	JC polyomavirus	JC polyomavirus	7086416	Run1	DNA	Human	Over 90%
D-Jamalpur-Sept1	V01108.1	5153	5041	52872	1093.69	97.8265	1447.9	Human BK virus (strain Dunlop) genome. (Closely related to SV40.)	1891762	Viruses	Cossaviricota	Papovaviricetes	Sepolyvirales	Polyomaviridae	Betapolyomavirus	Betapolyomavirus hominis	unclassified Betapolyomavirus hominis subspecies/strain	unclassified Betapolyomavirus hominis strain	7086416	Run1	DNA	Human	Over 90%
D-Jamalpur-Sept1	M19296.1	5323	4828	49129	1002.15	90.7007	1302.43	Canine parvovirus strain CPV-N, complete cds	10788	Viruses	Cossaviricota	Quintoviricetes	Piccovirales	Parvoviridae	Protoparvovirus	Carnivore protoparvovirus 1	Canine parvovirus	Canine parvovirus	7086416	Run1	DNA	Animal	Over 90%
D-Jamalpur-Sept1	KY316160.1	34169	33950	171098	518.629	99.3591	706.62	Human adenovirus 41 isolate SH/2015/D16, complete genome	10524	Viruses	Preplasmiviricota	Tectiliviricetes	Rowavirales	Adenoviridae	Mastadenovirus	Human mastadenovirus F	Human adenovirus 41	Human adenovirus 41	7086416	Run1	DNA	Human	Over 90%
D-Jamalpur-Sept1	JQ326209.1	35153	32471	99845	293.78	92.3705	400.809	Human adenovirus 19, complete genome	28278	Viruses	Preplasmiviricota	Tectiliviricetes	Rowavirales	Adenoviridae	Mastadenovirus	Human mastadenovirus D	Human adenovirus 19	Human adenovirus 19	7086416	Run1	DNA	Human	Over 90%
D-Jamalpur-Sept1	L19443.1	34214	33490	78070	236.835	97.8839	321.998	Human adenovirus F, complete genome	130309	Viruses	Preplasmiviricota	Tectiliviricetes	Rowavirales	Adenoviridae	Mastadenovirus	Human mastadenovirus F	unclassified Human mastadenovirus F subspecies/strain	unclassified Human mastadenovirus F strain	7086416	Run1	DNA	Human	Over 90%
D-Jamalpur-Sept1	NC_045512.2	29903	28392	55018	191.471	94.947	259.635	Severe acute respiratory syndrome coronavirus 2 isolate Wuhan-Hu-1, complete genome	2697049	Viruses	Pisuviricota	Pisoniviricetes	Nidovirales	Coronaviridae	Betacoronavirus	Severe acute respiratory syndrome-related coronavirus	Severe acute respiratory syndrome coronavirus 2	Severe acute respiratory syndrome coronavirus 2	7086416	Run1	RNA	Human	Over 90%
D-Jamalpur-Sept1	AF108105.1	35100	30815	59912	178.06	87.792	240.869	Human adenovirus type 17 complete genome	46922	Viruses	Preplasmiviricota	Tectiliviricetes	Rowavirales	Adenoviridae	Mastadenovirus	Human mastadenovirus D	Human adenovirus 17	Human adenovirus 17	7086416	Run1	DNA	Human	50% to 90%
D-Jamalpur-Sept1	AB448776.1	35215	32307	59881	177.47	91.7422	239.958	Human adenovirus 37 genomic DNA, complete genome, isolate: 1991	52275	Viruses	Preplasmiviricota	Tectiliviricetes	Rowavirales	Adenoviridae	Mastadenovirus	Human mastadenovirus D	Human adenovirus D37	Human adenovirus D37	7086416	Run1	DNA	Human	Over 90%
D-Jamalpur-Sept1	KY489985.1	5200	3150	8646	176.272	60.5769	234.631	Porcine bocavirus 1 isolate JOA_011, complete genome	1048219	Viruses	Cossaviricota	Quintoviricetes	Piccovirales	Parvoviridae	Bocaparvovirus	Ungulate bocaparvovirus 2	Porcine bocavirus 1	Porcine bocavirus 1	7086416	Run1	DNA	Animal	50% to 90%
D-Jamalpur-Sept1	AF043303.1	4679	4572	7085	163.97	97.7132	213.678	Adeno-associated virus 2, complete genome	10804	Viruses	Cossaviricota	Quintoviricetes	Piccovirales	Parvoviridae	Dependoparvovirus	Adeno-associated dependoparvovirus A	adeno-associated virus 2	adeno-associated virus 2	7086416	Run1	DNA	Human	Over 90%
D-Jamalpur-Sept1	X70829.1	7308	7304	10052	144.023	99.9453	194.101	Human papillomavirus type 65 complete genome	28312	Viruses	Cossaviricota	Papovaviricetes	Zurhausenvirales	Papillomaviridae	Gammapapillomavirus	Gammapapillomavirus 1	Human papillomavirus 65	Human papillomavirus 65	7086416	Run1	DNA	Human	Over 90%
D-Jamalpur-Sept1	NC_001356.1	7815	7810	7666	103.202	99.936	138.425	Human papillomavirus - 1, complete genome	334203	Viruses	Cossaviricota	Papovaviricetes	Zurhausenvirales	Papillomaviridae	Mupapillomavirus	Mupapillomavirus 1	unclassified Mupapillomavirus 1 subspecies/strain	unclassified Mupapillomavirus 1 strain	7086416	Run1	DNA	Human	Over 90%
D-Jamalpur-Sept1	MF118167.1	3925	1983	3567	96.1107	50.5223	128.244	Human fecal virus Jorvi2, complete genome	2017081	Viruses	Cressdnaviricota	Arfiviricetes	Cirlivirales	Circoviridae	unclassified Circoviridae genus	Human fecal virus Jorvi2	unclassified Human fecal virus Jorvi2 subspecies/strain	unclassified Human fecal virus Jorvi2 strain	7086416	Run1	DNA	Human	50% to 90%
D-Jamalpur-Sept1	X70828.1	7348	7304	3690	52.6696	99.4012	70.8648	Human papillomavirus type 63 complete genome	28311	Viruses	Cossaviricota	Papovaviricetes	Zurhausenvirales	Papillomaviridae	Mupapillomavirus	Mupapillomavirus 2	Human papillomavirus type 63	Human papillomavirus type 63	7086416	Run1	DNA	Human	Over 90%
D-Jamalpur-Sept1	FJ973560.1	4958	2309	2192	44.4624	46.5712	62.3889	Human bocavirus 2b NI strain HBoV2B-NI-213, complete genome	1511881	Viruses	Cossaviricota	Quintoviricetes	Piccovirales	Parvoviridae	Bocaparvovirus	Primate bocaparvovirus 2	Human bocavirus 2b NI	Human bocavirus 2b NI	7086416	Run1	DNA	Human	10% to 50%
D-Jamalpur-Sept1	MF588725.1	7262	6682	3186	46.2823	92.0132	61.9103	Gammapapillomavirus 15 isolate Gamma15_w18c134, complete genome	1513260	Viruses	Cossaviricota	Papovaviricetes	Zurhausenvirales	Papillomaviridae	Gammapapillomavirus	Gammapapillomavirus 15	unclassified Gammapapillomavirus 15 subspecies/strain	unclassified Gammapapillomavirus 15 strain	7086416	Run1	DNA	Human	Over 90%
D-Jamalpur-Sept1	HM011556.1	5387	4737	2160	42.3913	87.9339	56.5822	Merkel cell polyomavirus isolate R17b, complete genome	493803	Viruses	Cossaviricota	Papovaviricetes	Sepolyvirales	Polyomaviridae	Alphapolyomavirus	Alphapolyomavirus quintihominis	Merkel cell polyomavirus	Merkel cell polyomavirus	7086416	Run1	DNA	Human	50% to 90%
D-Jamalpur-Sept1	MH355567.1	35217	28604	12764	37.5982	81.2221	51.1455	Human adenovirus 7 strain BJ/CHN/2018, complete genome	10519	Viruses	Preplasmiviricota	Tectiliviricetes	Rowavirales	Adenoviridae	Mastadenovirus	Human mastadenovirus B	Human adenovirus 7	Human adenovirus 7	7086416	Run1	DNA	Human	50% to 90%
D-Jamalpur-Sept1	NC_012042.1	5196	2701	1801	34.8092	51.9823	48.9123	Human bocavirus 2c PK isolate PK-5510, complete genome	1511882	Viruses	Cossaviricota	Quintoviricetes	Piccovirales	Parvoviridae	Bocaparvovirus	Primate bocaparvovirus 2	Human bocavirus 2c PK	Human bocavirus 2c PK	7086416	Run1	DNA	Human	50% to 90%
D-Jamalpur-Sept1	KX868289.2	33676	27644	11570	35.8288	82.0881	48.4826	Human adenovirus 12 isolate GyK010, complete genome	28282	Viruses	Preplasmiviricota	Tectiliviricetes	Rowavirales	Adenoviridae	Mastadenovirus	Human mastadenovirus A	Human adenovirus 12	Human adenovirus 12	7086416	Run1	DNA	Human	50% to 90%
D-Jamalpur-Sept1	X01457.1	5176	2171	1667	34.3818	41.9436	45.448	Parvovirus h-1, complete genome	10799	Viruses	Cossaviricota	Quintoviricetes	Piccovirales	Parvoviridae	Protoparvovirus	Rodent protoparvovirus 1	H-1 parvovirus	H-1 parvovirus	7086416	Run1	DNA	Human	10% to 50%
D-Jamalpur-Sept1	NC_012564.1	5242	2309	1442	26.6294	44.0481	38.8188	Human bocavirus 3, complete genome	638313	Viruses	Cossaviricota	Quintoviricetes	Piccovirales	Parvoviridae	Bocaparvovirus	Primate bocaparvovirus 1	Human bocavirus 3	Human bocavirus 3	7086416	Run1	DNA	Human	10% to 50%
D-Jamalpur-Sept1	AB746853.1	34978	16962	9164	26.6182	48.4933	36.9712	Human adenovirus 8 DNA, complete genome, strain: Trim variant	31545	Viruses	Preplasmiviricota	Tectiliviricetes	Rowavirales	Adenoviridae	Mastadenovirus	Human mastadenovirus D	Human adenovirus D8	Human adenovirus D8	7086416	Run1	DNA	Human	10% to 50%
D-Jamalpur-Sept1	X70827.1	7353	6512	1858	26.4458	88.5625	35.6578	Human papillomavirus type 4 complete genome	10617	Viruses	Cossaviricota	Papovaviricetes	Zurhausenvirales	Papillomaviridae	Gammapapillomavirus	Gammapapillomavirus 1	Human papillomavirus 4	Human papillomavirus 4	7086416	Run1	DNA	Human	50% to 90%
D-Jamalpur-Sept1	AY189948.2	5335	3323	1135	22.6916	62.2868	30.0217	Blattella germanica densovirus 1, complete genome	220638	Viruses	Cossaviricota	Quintoviricetes	Piccovirales	Parvoviridae	Blattambidensovirus	Blattodean blattambidensovirus 1	Blattella germanica densovirus 1	Blattella germanica densovirus 1	7086416	Run1	DNA	Insect	50% to 90%
D-Jamalpur-Sept1	AM749299.1	33763	22205	6104	18.749	65.7673	25.5121	Human adenovirus type 31 complete genome, serotype 31	10529	Viruses	Preplasmiviricota	Tectiliviricetes	Rowavirales	Adenoviridae	Mastadenovirus	Human mastadenovirus A	Human adenovirus 31	Human adenovirus 31	7086416	Run1	DNA	Human	50% to 90%
D-Jamalpur-Sept1	EF564600.1	35130	19421	6004	17.6997	55.2832	24.1177	Human adenovirus 3+11p strain OvAd1, complete genome	459785	Viruses	Preplasmiviricota	Tectiliviricetes	Rowavirales	Adenoviridae	Mastadenovirus	Human mastadenovirus B	Human adenovirus 3+11p	Human adenovirus 3+11p	7086416	Run1	DNA	Human	50% to 90%
D-Jamalpur-Sept1	FJ947080.1	7476	4936	1125	15.8694	66.0246	21.2352	Human papillomavirus type 115 isolate GC02, complete genome	696746	Viruses	Cossaviricota	Papovaviricetes	Zurhausenvirales	Papillomaviridae	Betapapillomavirus	Betapapillomavirus 3	human papillomavirus 115	human papillomavirus 115	7086416	Run1	DNA	Human	50% to 90%
D-Jamalpur-Sept1	AF083975.2	45063	24633	6733	15.4652	54.6635	21.0844	Fowl adenovirus 9, complete genome	172864	Viruses	Preplasmiviricota	Tectiliviricetes	Rowavirales	Adenoviridae	Aviadenovirus	Fowl aviadenovirus D	Fowl adenovirus 9	Fowl adenovirus 9	7086416	Run1	DNA	Animal	50% to 90%
D-Jamalpur-Sept1	U31781.1	7324	4171	1000	13.972	56.9498	19.2675	Human papillomavirus type 23, complete genome	37955	Viruses	Cossaviricota	Papovaviricetes	Zurhausenvirales	Papillomaviridae	Betapapillomavirus	Betapapillomavirus 2	Human papillomavirus 23	Human papillomavirus 23	7086416	Run1	DNA	Human	50% to 90%
D-Jamalpur-Sept1	Y15176.1	7427	5351	973	13.7411	72.0479	18.4873	Human papillomavirus type 80 E6, E7, E1, E2, E4, L2, and L1 genes	69987	Viruses	Cossaviricota	Papovaviricetes	Zurhausenvirales	Papillomaviridae	Betapapillomavirus	Betapapillomavirus 2	Human papillomavirus 80	Human papillomavirus 80	7086416	Run1	DNA	Human	50% to 90%
D-Jamalpur-Sept1	U31790.1	7184	4704	854	12.6208	65.4788	16.7751	Human papillomavirus type 50, complete genome	40539	Viruses	Cossaviricota	Papovaviricetes	Zurhausenvirales	Papillomaviridae	Gammapapillomavirus	Gammapapillomavirus 3	Human papillomavirus type 50	Human papillomavirus type 50	7086416	Run1	DNA	Human	50% to 90%
D-Jamalpur-Sept1	U31782.1	7452	4147	740	10.5812	55.6495	14.013	Human papillomavirus type 24, complete genome	37956	Viruses	Cossaviricota	Papovaviricetes	Zurhausenvirales	Papillomaviridae	Betapapillomavirus	Betapapillomavirus 1	human papillomavirus 24	human papillomavirus 24	7086416	Run1	DNA	Human	50% to 90%
D-Jamalpur-Sept1	HF930491.1	7359	4138	704	10.2122	56.2305	13.4998	Human papillomavirus type 174 complete genome, isolate V001	1347832	Viruses	Cossaviricota	Papovaviricetes	Zurhausenvirales	Papillomaviridae	Betapapillomavirus	Betapapillomavirus 2	Human papillomavirus 174	Human papillomavirus 174	7086416	Run1	DNA	Human	50% to 90%
D-Jamalpur-Sept1	JX429973.1	7329	3637	681	9.44992	49.6248	13.1122	Human papillomavirus type 156 isolate GC01, complete genome	1248396	Viruses	Cossaviricota	Papovaviricetes	Zurhausenvirales	Papillomaviridae	Gammapapillomavirus	Gammapapillomavirus 18	Human papillomavirus type 156	Human papillomavirus type 156	7086416	Run1	DNA	Human	10% to 50%
D-Jamalpur-Sept1	X74468.1	7412	3740	651	9.2772	50.4587	12.3942	Human papillomavirus type 15 genomic DNA	10606	Viruses	Cossaviricota	Papovaviricetes	Zurhausenvirales	Papillomaviridae	Betapapillomavirus	Betapapillomavirus 2	Human papillomavirus 15	Human papillomavirus 15	7086416	Run1	DNA	Human	50% to 90%
D-Jamalpur-Sept1	GQ845444.1	7397	4224	647	9.27018	57.1042	12.343	Human papillomavirus type 122, complete genome	765054	Viruses	Cossaviricota	Papovaviricetes	Zurhausenvirales	Papillomaviridae	Betapapillomavirus	Betapapillomavirus 2	Human papillomavirus 122	Human papillomavirus 122	7086416	Run1	DNA	Human	50% to 90%
D-Jamalpur-Sept1	MF588724.1	7272	2519	629	8.98315	34.6397	12.2059	Gammapapillomavirus 15 isolate Gamma15_EV03c104, complete genome	1513260	Viruses	Cossaviricota	Papovaviricetes	Zurhausenvirales	Papillomaviridae	Gammapapillomavirus	Gammapapillomavirus 15	unclassified Gammapapillomavirus 15 subspecies/strain	unclassified Gammapapillomavirus 15 strain	7086416	Run1	DNA	Human	10% to 50%
D-Jamalpur-Sept1	MF588720.1	7142	3073	595	8.87672	43.0272	11.7563	Gammapapillomavirus 12 isolate Gamma12_w34c11a, complete genome	1513257	Viruses	Cossaviricota	Papovaviricetes	Zurhausenvirales	Papillomaviridae	Gammapapillomavirus	Gammapapillomavirus 12	unclassified Gammapapillomavirus 12 subspecies/strain	unclassified Gammapapillomavirus 12 strain	7086416	Run1	DNA	Human	10% to 50%
D-Jamalpur-Sept1	GQ845442.1	7304	3701	582	8.3078	50.6709	11.2444	Human papillomavirus type 120, complete genome	765052	Viruses	Cossaviricota	Papovaviricetes	Zurhausenvirales	Papillomaviridae	Betapapillomavirus	Betapapillomavirus 2	Human papillomavirus 120	Human papillomavirus 120	7086416	Run1	DNA	Human	50% to 90%
D-Jamalpur-Sept1	HM999999.1	7224	2591	565	8.16327	35.8666	11.0368	Human papillomavirus type 147 isolate GH659, complete genome	1070420	Viruses	Cossaviricota	Papovaviricetes	Zurhausenvirales	Papillomaviridae	Gammapapillomavirus	Gammapapillomavirus 8	human papillomavirus 147	human papillomavirus 147	7086416	Run1	DNA	Human	10% to 50%
D-Jamalpur-Sept1	EU410348.1	7423	3270	577	8.1907	44.0523	10.9691	Human papillomavirus type 110, complete genome	518629	Viruses	Cossaviricota	Papovaviricetes	Zurhausenvirales	Papillomaviridae	Betapapillomavirus	Betapapillomavirus 2	Human papillomavirus 110	Human papillomavirus 110	7086416	Run1	DNA	Human	10% to 50%
D-Jamalpur-Sept1	MF588782.1	4152	1860	296	7.32409	44.7977	10.0602	Gammapapillomavirus 22 isolate iGamma22_m090c255 E7 (E7), E1 (E1), E2 (E2), and E4 (E4) genes, complete cds	1961679	Viruses	Cossaviricota	Papovaviricetes	Zurhausenvirales	Papillomaviridae	Gammapapillomavirus	Gammapapillomavirus 22	unclassified Gammapapillomavirus 22 subspecies/strain	unclassified Gammapapillomavirus 22 strain	7086416	Run1	DNA	Human	10% to 50%
D-Jamalpur-Sept1	FM955842.1	7412	3395	489	7.83958	45.8041	9.30994	Human papillomavirus type 113, complete genome	587351	Viruses	Cossaviricota	Papovaviricetes	Zurhausenvirales	Papillomaviridae	Betapapillomavirus	Betapapillomavirus 2	Human papillomavirus 113	Human papillomavirus 113	7086416	Run1	DNA	Human	10% to 50%
D-Jamalpur-Sept1	NC_012729.2	5104	1337	314	6.54966	26.1951	8.68145	Human bocavirus 4 NI strain HBoV4-NI-385, complete genome	1511883	Viruses	Cossaviricota	Quintoviricetes	Piccovirales	Parvoviridae	Bocaparvovirus	Primate bocaparvovirus 2	Human bocavirus 4 NI	Human bocavirus 4 NI	7086416	Run1	DNA	Human	10% to 50%
D-Jamalpur-Sept1	Y15174.1	7549	2861	446	6.34248	37.8991	8.33717	Human papillomavirus type 76 E6, E7, E1, E2, E4, L2, and L1 genes	69985	Viruses	Cossaviricota	Papovaviricetes	Zurhausenvirales	Papillomaviridae	Betapapillomavirus	Betapapillomavirus 3	human papillomavirus 76	human papillomavirus 76	7086416	Run1	DNA	Human	10% to 50%
D-Jamalpur-Sept1	MF588756.1	7230	2222	426	6.16766	30.7331	8.31466	Gammapapillomavirus sp. isolate GammaiDysk6_wg1c05, complete genome	2049444	Viruses	Cossaviricota	Papovaviricetes	Zurhausenvirales	Papillomaviridae	Gammapapillomavirus	Gammapapillomavirus sp.	unclassified Gammapapillomavirus sp. subspecies/strain	unclassified Gammapapillomavirus sp. strain	7086416	Run1	DNA	Human	10% to 50%
D-Jamalpur-Sept1	MF588745.1	7193	2522	418	5.62999	35.0619	8.20049	Gammapapillomavirus 23 isolate Gamma23_m090c10, complete genome	1961680	Viruses	Cossaviricota	Papovaviricetes	Zurhausenvirales	Papillomaviridae	Gammapapillomavirus	Gammapapillomavirus 23	unclassified Gammapapillomavirus 23 subspecies/strain	unclassified Gammapapillomavirus 23 strain	7086416	Run1	DNA	Human	10% to 50%
D-Jamalpur-Sept1	EU410349.1	7384	2934	418	5.97553	39.7346	7.98837	Human papillomavirus type 111, complete genome	518630	Viruses	Cossaviricota	Papovaviricetes	Zurhausenvirales	Papillomaviridae	Betapapillomavirus	Betapapillomavirus 2	Human papillomavirus 111	Human papillomavirus 111	7086416	Run1	DNA	Human	10% to 50%
D-Jamalpur-Sept1	MF588739.1	7260	2525	380	5.61969	34.7796	7.38619	Gammapapillomavirus 22 isolate Gamma22_TVMBSWc141, complete genome	1961679	Viruses	Cossaviricota	Papovaviricetes	Zurhausenvirales	Papillomaviridae	Gammapapillomavirus	Gammapapillomavirus 22	unclassified Gammapapillomavirus 22 subspecies/strain	unclassified Gammapapillomavirus 22 strain	7086416	Run1	DNA	Human	10% to 50%
D-Jamalpur-Sept1	MF588764.1	4433	1871	226	5.06538	42.2062	7.19423	Gammapapillomavirus 9 isolate iGamma09_w27c95a E2 (E2), E4 (E4), and L2 (L2) genes, complete cds	1175851	Viruses	Cossaviricota	Papovaviricetes	Zurhausenvirales	Papillomaviridae	Gammapapillomavirus	Gammapapillomavirus 9	unclassified Gammapapillomavirus 9 subspecies/strain	unclassified Gammapapillomavirus 9 strain	7086416	Run1	DNA	Human	10% to 50%
D-Jamalpur-Sept1	KR816170.1	7416	2171	361	5.21277	29.2745	6.86927	Human papillomavirus type 182 isolate ACS214, complete genome	1851125	Viruses	Cossaviricota	Papovaviricetes	Zurhausenvirales	Papillomaviridae	Betapapillomavirus	Betapapillomavirus 2	Human papillomavirus type 182	Human papillomavirus type 182	7086416	Run1	DNA	Human	10% to 50%
D-Jamalpur-Sept1	M17463.1	7746	2168	374	4.88533	27.9886	6.81346	Human papillomoavirus type 5, complete genome	333923	Viruses	Cossaviricota	Papovaviricetes	Zurhausenvirales	Papillomaviridae	Betapapillomavirus	Betapapillomavirus 1	Human papillomavirus 5	Human papillomavirus 5	7086416	Run1	DNA	Human	10% to 50%
D-Jamalpur-Sept1	HE963025.1	7443	2884	359	5.06554	38.7478	6.80644	Human papillomavirus type 159 complete genome, isolate SIBX8	1209820	Viruses	Cossaviricota	Papovaviricetes	Zurhausenvirales	Papillomaviridae	Betapapillomavirus	Betapapillomavirus 2	Human papillomavirus 159	Human papillomavirus 159	7086416	Run1	DNA	Human	10% to 50%
D-Jamalpur-Sept1	JX444073.1	7143	2316	340	5.09366	32.4234	6.71694	Human papillomavirus KC5, complete genome	1647924	Viruses	Cossaviricota	Papovaviricetes	Zurhausenvirales	Papillomaviridae	Gammapapillomavirus	Human papillomavirus KC5	unclassified Human papillomavirus KC5 subspecies/strain	unclassified Human papillomavirus KC5 strain	7086416	Run1	DNA	Human	10% to 50%
D-Jamalpur-Sept1	MF588729.1	7339	2171	347	4.94227	29.5817	6.67215	Gammapapillomavirus 18 isolate Gamma18_EV03c188, complete genome	1513263	Viruses	Cossaviricota	Papovaviricetes	Zurhausenvirales	Papillomaviridae	Gammapapillomavirus	Gammapapillomavirus 18	unclassified Gammapapillomavirus 18 subspecies/strain	unclassified Gammapapillomavirus 18 strain	7086416	Run1	DNA	Human	10% to 50%
D-Jamalpur-Sept1	JX262162.1	4939	1626	223	4.71518	32.9216	6.37146	Human polyomavirus 10 isolate 10ww, complete genome	1208309	Viruses	Cossaviricota	Papovaviricetes	Sepolyvirales	Polyomaviridae	Deltapolyomavirus	Deltapolyomavirus decihominis	unclassified Deltapolyomavirus decihominis subspecies/strain	unclassified Deltapolyomavirus decihominis strain	7086416	Run1	DNA	Human	10% to 50%
D-Jamalpur-Sept1	GU191019.1	34177	7658	1533	4.70903	22.4069	6.32968	Human adenovirus 18 isolate D.C., complete genome	10528	Viruses	Preplasmiviricota	Tectiliviricetes	Rowavirales	Adenoviridae	Mastadenovirus	Human mastadenovirus A	Human adenovirus 18	Human adenovirus 18	7086416	Run1	DNA	Human	10% to 50%
D-Jamalpur-Sept1	MF588719.1	7110	2722	311	4.62443	38.2841	6.17254	Gammapapillomavirus 12 isolate Gamma12_w23c77, complete genome	1513257	Viruses	Cossaviricota	Papovaviricetes	Zurhausenvirales	Papillomaviridae	Gammapapillomavirus	Gammapapillomavirus 12	unclassified Gammapapillomavirus 12 subspecies/strain	unclassified Gammapapillomavirus 12 strain	7086416	Run1	DNA	Human	10% to 50%
D-Jamalpur-Sept1	GU233853.1	7219	1599	315	4.69798	22.1499	6.15753	Human papillomavirus type 129, complete genome	931210	Viruses	Cossaviricota	Papovaviricetes	Zurhausenvirales	Papillomaviridae	Gammapapillomavirus	Gammapapillomavirus 9	Human papillomavirus type 129	Human papillomavirus type 129	7086416	Run1	DNA	Human	10% to 50%
D-Jamalpur-Sept1	AF085716.1	4642	1617	201	4.75245	34.8341	6.11032	Adeno-associated virus 5 DNA binding trs helicase (Rep22) and capsid protein (VP1) genes, complete cds	82300	Viruses	Cossaviricota	Quintoviricetes	Piccovirales	Parvoviridae	Dependoparvovirus	Adeno-associated dependoparvovirus B	adeno-associated virus 5	adeno-associated virus 5	7086416	Run1	DNA	Human	10% to 50%
D-Jamalpur-Sept1	X74464.1	7434	2148	318	5.12836	28.8943	6.0364	Human papillomavirus type 9 genomic DNA	10621	Viruses	Cossaviricota	Papovaviricetes	Zurhausenvirales	Papillomaviridae	Betapapillomavirus	Betapapillomavirus 2	Human papillomavirus 9	Human papillomavirus 9	7086416	Run1	DNA	Human	10% to 50%
D-Jamalpur-Sept1	MG712775.1	44454	11286	1869	4.40249	25.388	5.93297	Fowl adenovirus 8b isolate SD1356, complete genome	586029	Viruses	Preplasmiviricota	Tectiliviricetes	Rowavirales	Adenoviridae	Aviadenovirus	Fowl aviadenovirus E	Fowl adenovirus 8b	Fowl adenovirus 8b	7086416	Run1	DNA	Animal	10% to 50%
D-Jamalpur-Sept1	U31786.1	7421	2131	309	4.37079	28.7158	5.87583	Human papillomavirus type 37, complete genome	37958	Viruses	Cossaviricota	Papovaviricetes	Zurhausenvirales	Papillomaviridae	Betapapillomavirus	Betapapillomavirus 2	Human papillomavirus 37	Human papillomavirus 37	7086416	Run1	DNA	Human	10% to 50%
D-Jamalpur-Sept1	MT505439.1	34777	8043	1407	4.13582	23.1274	5.7092	Human adenovirus 11 strain HAdV-B2/USA_GA/8348/2019/P11H11F12, complete genome	10541	Viruses	Preplasmiviricota	Tectiliviricetes	Rowavirales	Adenoviridae	Mastadenovirus	Human mastadenovirus B	Human adenovirus 11	Human adenovirus 11	7086416	Run1	DNA	Human	10% to 50%
D-Jamalpur-Sept1	KU569162.1	5154	1327	207	4.07474	25.747	5.6676	Galliform aveparvovirus 1 isolate IPV, complete genome	1511865	Viruses	Cossaviricota	Quintoviricetes	Piccovirales	Parvoviridae	Aveparvovirus	Galliform aveparvovirus 1	unclassified Galliform aveparvovirus 1 subspecies/strain	unclassified Galliform aveparvovirus 1 strain	7086416	Run1	DNA	Animal	10% to 50%
D-Jamalpur-Sept1	KJ913662.1	7184	2209	282	4.21837	30.7489	5.53932	Human papillomavirus type 199 isolate KC82-SLO, complete genome	1545700	Viruses	Cossaviricota	Papovaviricetes	Zurhausenvirales	Papillomaviridae	Gammapapillomavirus	Gammapapillomavirus 12	Human papillomavirus 199	Human papillomavirus 199	7086416	Run1	DNA	Human	10% to 50%
D-Jamalpur-Sept1	AY186198.1	4694	1642	182	4.2544	34.9808	5.47144	Avian adeno-associated virus ATCC VR-865, complete genome	219704	Viruses	Cossaviricota	Quintoviricetes	Piccovirales	Parvoviridae	Dependoparvovirus	Avian dependoparvovirus 1	Avian adeno-associated virus ATCC VR-865	Avian adeno-associated virus ATCC VR-865	7086416	Run1	DNA	Animal	10% to 50%
D-Jamalpur-Sept1	AC_000008.1	35938	7418	1387	3.98941	20.6411	5.44623	Human adenovirus 5, complete genome	28285	Viruses	Preplasmiviricota	Tectiliviricetes	Rowavirales	Adenoviridae	Mastadenovirus	Human mastadenovirus C	Human adenovirus 5	Human adenovirus 5	7086416	Run1	DNA	Human	10% to 50%
D-Jamalpur-Sept1	FN677755.1	7436	1791	284	4.11213	24.0855	5.38955	Human papillomavirus type 150, complete genome, isolate SIBX1	743811	Viruses	Cossaviricota	Papovaviricetes	Zurhausenvirales	Papillomaviridae	Betapapillomavirus	Betapapillomavirus 5	human papillomavirus 150	human papillomavirus 150	7086416	Run1	DNA	Human	10% to 50%
D-Jamalpur-Sept1	MF588737.1	7285	1675	277	4.09054	22.9925	5.36567	Gammapapillomavirus 22 isolate Gamma22_m090c145, complete genome	1961679	Viruses	Cossaviricota	Papovaviricetes	Zurhausenvirales	Papillomaviridae	Gammapapillomavirus	Gammapapillomavirus 22	unclassified Gammapapillomavirus 22 subspecies/strain	unclassified Gammapapillomavirus 22 strain	7086416	Run1	DNA	Human	10% to 50%
D-Jamalpur-Sept1	MF588712.1	7257	1473	273	3.94752	20.2976	5.30859	Gammapapillomavirus 9 isolate Gamma09_w27c39c, complete genome	1175851	Viruses	Cossaviricota	Papovaviricetes	Zurhausenvirales	Papillomaviridae	Gammapapillomavirus	Gammapapillomavirus 9	unclassified Gammapapillomavirus 9 subspecies/strain	unclassified Gammapapillomavirus 9 strain	7086416	Run1	DNA	Human	10% to 50%
D-Jamalpur-Sept1	EF467176.1	7326	1689	268	3.86483	23.0549	5.16228	Human papillomavirus type 88, complete genome	337054	Viruses	Cossaviricota	Papovaviricetes	Zurhausenvirales	Papillomaviridae	Gammapapillomavirus	Gammapapillomavirus 5	Human papillomavirus type 88	Human papillomavirus type 88	7086416	Run1	DNA	Human	10% to 50%
D-Jamalpur-Sept1	GU989205.1	5232	1645	186	3.56887	31.4411	5.01671	Trichodysplasia spinulosa-associated polyomavirus, complete genome	862909	Viruses	Cossaviricota	Papovaviricetes	Sepolyvirales	Polyomaviridae	Alphapolyomavirus	Alphapolyomavirus octihominis	Trichodysplasia spinulosa-associated polyomavirus	Trichodysplasia spinulosa-associated polyomavirus	7086416	Run1	DNA	Human	10% to 50%
D-Jamalpur-Sept1	FM955841.1	7667	2076	269	3.69083	27.0771	4.95108	Human papillomavirus type 105, complete genome	587350	Viruses	Cossaviricota	Papovaviricetes	Zurhausenvirales	Papillomaviridae	Betapapillomavirus	Betapapillomavirus 1	Human papillomavirus 105	Human papillomavirus 105	7086416	Run1	DNA	Human	10% to 50%
D-Jamalpur-Sept1	FN677756.1	7386	1356	249	3.59936	18.3591	4.75733	Human papillomavirus type 151, complete genome, isolate SIBX2	743812	Viruses	Cossaviricota	Papovaviricetes	Zurhausenvirales	Papillomaviridae	Betapapillomavirus	Betapapillomavirus 2	Human papillomavirus 151	Human papillomavirus 151	7086416	Run1	DNA	Human	10% to 50%
D-Jamalpur-Sept1	U31787.1	7400	1819	246	3.52372	24.5811	4.69112	Human papillomavirus type 38, complete genome	37959	Viruses	Cossaviricota	Papovaviricetes	Zurhausenvirales	Papillomaviridae	Betapapillomavirus	Betapapillomavirus 2	Human papillomavirus 38	Human papillomavirus 38	7086416	Run1	DNA	Human	10% to 50%
D-Jamalpur-Sept1	U31780.1	7368	1413	243	3.55749	19.1775	4.65404	Human papillomavirus type 22, complete genome	37954	Viruses	Cossaviricota	Papovaviricetes	Zurhausenvirales	Papillomaviridae	Betapapillomavirus	Betapapillomavirus 2	Human papillomavirus 22	Human papillomavirus 22	7086416	Run1	DNA	Human	10% to 50%
D-Jamalpur-Sept1	MF588735.1	7231	1590	236	3.46448	21.9887	4.60561	Gammapapillomavirus 22 isolate Gamma22_EV03c212, complete genome	1961679	Viruses	Cossaviricota	Papovaviricetes	Zurhausenvirales	Papillomaviridae	Gammapapillomavirus	Gammapapillomavirus 22	unclassified Gammapapillomavirus 22 subspecies/strain	unclassified Gammapapillomavirus 22 strain	7086416	Run1	DNA	Human	10% to 50%
D-Jamalpur-Sept1	HM011560.1	4926	1454	160	3.30905	29.5168	4.58352	Polyomavirus HPyV6 isolate 607a, complete genome	746830	Viruses	Cossaviricota	Papovaviricetes	Sepolyvirales	Polyomaviridae	Deltapolyomavirus	Deltapolyomavirus sextihominis	Human polyomavirus 6	Human polyomavirus 6	7086416	Run1	DNA	Human	10% to 50%
D-Jamalpur-Sept1	GQ368252.1	4684	1473	151	3.58183	31.4475	4.54918	Avian adeno-associated virus isolate YZ-1, complete genome	341671	Viruses	Cossaviricota	Quintoviricetes	Piccovirales	Parvoviridae	Dependoparvovirus	Avian dependoparvovirus 1	Avian adeno-associated virus	Avian adeno-associated virus	7086416	Run1	DNA	Animal	10% to 50%
D-Jamalpur-Sept1	HM999998.1	7265	1339	229	3.41237	18.4308	4.44809	Human papillomavirus type 146 isolate GH1677, complete genome	1070419	Viruses	Cossaviricota	Papovaviricetes	Zurhausenvirales	Papillomaviridae	Gammapapillomavirus	Gammapapillomavirus 15	Human papillomavirus 146	Human papillomavirus 146	7086416	Run1	DNA	Human	10% to 50%
D-Jamalpur-Sept1	M12737.1	7654	1504	240	3.33089	19.6499	4.42483	Human papillomavirus type 8, complete genome	10579	Viruses	Cossaviricota	Papovaviricetes	Zurhausenvirales	Papillomaviridae	Betapapillomavirus	Betapapillomavirus 1	Human papillomavirus type 8	Human papillomavirus type 8	7086416	Run1	DNA	Human	10% to 50%
D-Jamalpur-Sept1	X74480.1	7560	1732	237	3.35304	22.9101	4.42385	Human papillomavirus type 49 genomic DNA	10616	Viruses	Cossaviricota	Papovaviricetes	Zurhausenvirales	Papillomaviridae	Betapapillomavirus	Betapapillomavirus 3	Human papillomavirus type 49	Human papillomavirus type 49	7086416	Run1	DNA	Human	10% to 50%
D-Jamalpur-Sept1	JX413106.1	7233	1230	226	3.11408	17.0054	4.40924	Human papillomavirus type 164 isolate KC4, complete genome	1315261	Viruses	Cossaviricota	Papovaviricetes	Zurhausenvirales	Papillomaviridae	Gammapapillomavirus	Gammapapillomavirus 8	human papillomavirus 164	human papillomavirus 164	7086416	Run1	DNA	Human	10% to 50%
D-Jamalpur-Sept1	NC_001802.1	9181	1321	265	3.02026	14.3884	4.07314	Human immunodeficiency virus 1, complete genome	11676	Viruses	Artverviricota	Revtraviricetes	Ortervirales	Retroviridae	Lentivirus	Human immunodeficiency virus 1	unclassified Human immunodeficiency virus 1 subspecies/strain	unclassified Human immunodeficiency virus 1 strain	7086416	Run1	RNA	Human	10% to 50%
D-Jamalpur-Sept1	MF588706.1	7262	1524	209	2.99578	20.986	4.06128	Gammapapillomavirus 8 isolate Gamma08_TVMBSGc529, complete genome	1175850	Viruses	Cossaviricota	Papovaviricetes	Zurhausenvirales	Papillomaviridae	Gammapapillomavirus	Gammapapillomavirus 8	unclassified Gammapapillomavirus 8 subspecies/strain	unclassified Gammapapillomavirus 8 strain	7086416	Run1	DNA	Human	10% to 50%
D-Jamalpur-Sept1	MF588691.1	7127	1558	205	3.07568	21.8605	4.05901	Gammapapillomavirus sp. isolate Gamma_w27c52c, complete genome	2049444	Viruses	Cossaviricota	Papovaviricetes	Zurhausenvirales	Papillomaviridae	Gammapapillomavirus	Gammapapillomavirus sp.	unclassified Gammapapillomavirus sp. subspecies/strain	unclassified Gammapapillomavirus sp. strain	7086416	Run1	DNA	Human	10% to 50%
D-Jamalpur-Sept1	MF588730.1	7292	1538	209	3.02016	21.0916	4.04458	Gammapapillomavirus 18 isolate Gamma18_EV07c385, complete genome	1513263	Viruses	Cossaviricota	Papovaviricetes	Zurhausenvirales	Papillomaviridae	Gammapapillomavirus	Gammapapillomavirus 18	unclassified Gammapapillomavirus 18 subspecies/strain	unclassified Gammapapillomavirus 18 strain	7086416	Run1	DNA	Human	10% to 50%
D-Jamalpur-Sept1	KR816182.1	7569	1593	211	9.14099	21.0464	3.93385	Human papillomavirus type 195 isolate ACS380, complete genome	1851220	Viruses	Cossaviricota	Papovaviricetes	Zurhausenvirales	Papillomaviridae	Betapapillomavirus	Betapapillomavirus 1	Human papillomavirus type 195	Human papillomavirus type 195	7086416	Run1	DNA	Human	10% to 50%
D-Jamalpur-Sept1	AY629583.1	4682	1559	129	2.81796	33.2977	3.88805	Avian adeno-associated virus strain DA-1, complete genome	281492	Viruses	Cossaviricota	Quintoviricetes	Piccovirales	Parvoviridae	Dependoparvovirus	Avian dependoparvovirus 1	Avian adeno-associated virus strain DA-1	Avian adeno-associated virus strain DA-1	7086416	Run1	DNA	Animal	10% to 50%
D-Jamalpur-Sept1	KU248828.1	7262	1469	199	2.80245	20.2286	3.86696	Papillomavirus JL74, complete genome	1846251	Viruses	Cossaviricota	Papovaviricetes	Zurhausenvirales	Papillomaviridae	Gammapapillomavirus	Gammapapillomavirus 13	Papillomavirus JL74	Papillomavirus JL74	7086416	Run1	DNA	Animal	10% to 50%
D-Jamalpur-Sept1	MF588758.1	7328	1563	197	2.8976	21.3291	3.79362	Gammapapillomavirus sp. isolate Gamma_w27c03a, complete genome	2049444	Viruses	Cossaviricota	Papovaviricetes	Zurhausenvirales	Papillomaviridae	Gammapapillomavirus	Gammapapillomavirus sp.	unclassified Gammapapillomavirus sp. subspecies/strain	unclassified Gammapapillomavirus sp. strain	7086416	Run1	DNA	Human	10% to 50%
D-Jamalpur-Sept1	MF588677.1	7550	1261	188	2.68081	16.702	3.51386	Betapapillomavirus 1 isolate Beta01_HIVGc36, complete genome	337051	Viruses	Cossaviricota	Papovaviricetes	Zurhausenvirales	Papillomaviridae	Betapapillomavirus	Betapapillomavirus 1	unclassified Betapapillomavirus 1 subspecies/strain	unclassified Betapapillomavirus 1 strain	7086416	Run1	DNA	Human	10% to 50%
D-Jamalpur-Sept1	X74469.1	7427	1488	182	2.61468	20.035	3.45805	Human papillomavirus type 17 genomic DNA	10607	Viruses	Cossaviricota	Papovaviricetes	Zurhausenvirales	Papillomaviridae	Betapapillomavirus	Betapapillomavirus 2	Human papillomavirus 17	Human papillomavirus 17	7086416	Run1	DNA	Human	10% to 50%
D-Jamalpur-Sept1	MF588704.1	7227	1493	177	2.63049	20.6586	3.45612	Gammapapillomavirus 8 isolate Gamma08_do1c232, complete genome	1175850	Viruses	Cossaviricota	Papovaviricetes	Zurhausenvirales	Papillomaviridae	Gammapapillomavirus	Gammapapillomavirus 8	unclassified Gammapapillomavirus 8 subspecies/strain	unclassified Gammapapillomavirus 8 strain	7086416	Run1	DNA	Human	10% to 50%
D-Jamalpur-Sept1	KT698166.1	7154	1159	175	2.44517	16.2007	3.45193	Human papillomavirus 157, complete genome	2259331	Viruses	Cossaviricota	Papovaviricetes	Zurhausenvirales	Papillomaviridae	Gammapapillomavirus	Gammapapillomavirus 12	Human papillomavirus 157	Human papillomavirus 157	7086416	Run1	DNA	Human	10% to 50%
D-Jamalpur-Sept1	FM955839.1	7380	1075	174	2.5231	14.5664	3.3271	Human papillomavirus type 100, complete genome	587349	Viruses	Cossaviricota	Papovaviricetes	Zurhausenvirales	Papillomaviridae	Betapapillomavirus	Betapapillomavirus 2	Human papillomavirus 100	Human papillomavirus 100	7086416	Run1	DNA	Human	10% to 50%
D-Jamalpur-Sept1	MF588736.1	7237	1221	170	2.50303	16.8716	3.31485	Gammapapillomavirus 22 isolate Gamma22_EV06c118, complete genome	1961679	Viruses	Cossaviricota	Papovaviricetes	Zurhausenvirales	Papillomaviridae	Gammapapillomavirus	Gammapapillomavirus 22	unclassified Gammapapillomavirus 22 subspecies/strain	unclassified Gammapapillomavirus 22 strain	7086416	Run1	DNA	Human	10% to 50%
D-Jamalpur-Sept1	MF588726.1	7262	1277	169	2.25759	17.5847	3.28401	Gammapapillomavirus 15 isolate Gamma15_w20c10a, complete genome	1513260	Viruses	Cossaviricota	Papovaviricetes	Zurhausenvirales	Papillomaviridae	Gammapapillomavirus	Gammapapillomavirus 15	unclassified Gammapapillomavirus 15 subspecies/strain	unclassified Gammapapillomavirus 15 strain	7086416	Run1	DNA	Human	10% to 50%
D-Jamalpur-Sept1	MF588723.1	7159	1602	165	2.26723	22.3774	3.25241	Gammapapillomavirus 14 isolate Gamma14_EV07c382, complete genome	1513259	Viruses	Cossaviricota	Papovaviricetes	Zurhausenvirales	Papillomaviridae	Gammapapillomavirus	Gammapapillomavirus 14	unclassified Gammapapillomavirus 14 subspecies/strain	unclassified Gammapapillomavirus 14 strain	7086416	Run1	DNA	Human	10% to 50%
D-Jamalpur-Sept1	KR816179.1	7244	1392	157	2.33	19.2159	3.0584	Human papillomavirus 192 isolate ACS142, complete genome	1851217	Viruses	Cossaviricota	Papovaviricetes	Zurhausenvirales	Papillomaviridae	Gammapapillomavirus	Gammapapillomavirus 15	Human papillomavirus 192	Human papillomavirus 192	7086416	Run1	DNA	Human	10% to 50%
D-Jamalpur-Sept1	KR816176.1	7318	1199	153	2.25279	16.3843	2.95034	Human papillomavirus 189 isolate ACS190, complete genome	1851214	Viruses	Cossaviricota	Papovaviricetes	Zurhausenvirales	Papillomaviridae	Gammapapillomavirus	Gammapapillomavirus 7	Human papillomavirus 189	Human papillomavirus 189	7086416	Run1	DNA	Human	10% to 50%
D-Jamalpur-Sept1	MF588731.1	7236	1046	147	1.84632	14.4555	2.86677	Gammapapillomavirus 18 isolate Gamma18_w34c34a, complete genome	1513263	Viruses	Cossaviricota	Papovaviricetes	Zurhausenvirales	Papillomaviridae	Gammapapillomavirus	Gammapapillomavirus 18	unclassified Gammapapillomavirus 18 subspecies/strain	unclassified Gammapapillomavirus 18 strain	7086416	Run1	DNA	Human	10% to 50%
D-Jamalpur-Sept1	Y15173.1	7537	1440	152	2.16164	19.1057	2.84589	Human papillomavirus type 75 E6, E7, E1, E2, E4, L2, and L1 genes	69984	Viruses	Cossaviricota	Papovaviricetes	Zurhausenvirales	Papillomaviridae	Betapapillomavirus	Betapapillomavirus 3	human papillomavirus 75	human papillomavirus 75	7086416	Run1	DNA	Human	10% to 50%
D-Jamalpur-Sept1	MF588734.1	7214	1381	140	1.96645	19.1433	2.73858	Gammapapillomavirus 22 isolate Gamma22_do1c02, complete genome	1961679	Viruses	Cossaviricota	Papovaviricetes	Zurhausenvirales	Papillomaviridae	Gammapapillomavirus	Gammapapillomavirus 22	unclassified Gammapapillomavirus 22 subspecies/strain	unclassified Gammapapillomavirus 22 strain	7086416	Run1	DNA	Human	10% to 50%
D-Jamalpur-Sept1	MF588732.1	7289	1212	136	2.01569	16.6278	2.63296	Gammapapillomavirus 19 isolate Gamma19_TVMBSGc2450, complete genome	1513264	Viruses	Cossaviricota	Papovaviricetes	Zurhausenvirales	Papillomaviridae	Gammapapillomavirus	Gammapapillomavirus 19	unclassified Gammapapillomavirus 19 subspecies/strain	unclassified Gammapapillomavirus 19 strain	7086416	Run1	DNA	Human	10% to 50%
D-Jamalpur-Sept1	HM011570.1	7181	1331	133	1.98478	18.535	2.61361	Gammapapillomavirus HPV127 isolate R3a, complete genome	746832	Viruses	Cossaviricota	Papovaviricetes	Zurhausenvirales	Papillomaviridae	Gammapapillomavirus	Gammapapillomavirus 12	Human papillomavirus 127	Human papillomavirus 127	7086416	Run1	DNA	Human	10% to 50%
D-Jamalpur-Sept1	MF588727.1	7221	1078	129	1.89096	14.9287	2.52096	Gammapapillomavirus 15 isolate Gamma15_wg1c09, complete genome	1513260	Viruses	Cossaviricota	Papovaviricetes	Zurhausenvirales	Papillomaviridae	Gammapapillomavirus	Gammapapillomavirus 15	unclassified Gammapapillomavirus 15 subspecies/strain	unclassified Gammapapillomavirus 15 strain	7086416	Run1	DNA	Human	10% to 50%
D-Jamalpur-Sept1	MF588740.1	7226	1091	129	1.89033	15.0983	2.51921	Gammapapillomavirus 22 isolate Gamma22_w18c07, complete genome	1961679	Viruses	Cossaviricota	Papovaviricetes	Zurhausenvirales	Papillomaviridae	Gammapapillomavirus	Gammapapillomavirus 22	unclassified Gammapapillomavirus 22 subspecies/strain	unclassified Gammapapillomavirus 22 strain	7086416	Run1	DNA	Human	10% to 50%
D-Jamalpur-Sept1	KR816174.1	7268	1307	128	1.87567	17.9829	2.48524	Human papillomavirus 187 isolate ACS447, complete genome	1851130	Viruses	Cossaviricota	Papovaviricetes	Zurhausenvirales	Papillomaviridae	Gammapapillomavirus	Gammapapillomavirus 26	Human papillomavirus 187	Human papillomavirus 187	7086416	Run1	DNA	Human	10% to 50%
D-Jamalpur-Sept1	MF588708.1	7273	1049	122	1.81876	14.4232	2.36712	Gammapapillomavirus 8 isolate Gamma08_w20c01b, complete genome	1175850	Viruses	Cossaviricota	Papovaviricetes	Zurhausenvirales	Papillomaviridae	Gammapapillomavirus	Gammapapillomavirus 8	unclassified Gammapapillomavirus 8 subspecies/strain	unclassified Gammapapillomavirus 8 strain	7086416	Run1	DNA	Human	10% to 50%
D-Jamalpur-Sept1	BK000400.1	33034	3595	518	1.64125	10.8827	2.2128	TPA: Bovine adenovirus 2, complete genome	NA	Viruses	Preplasmiviricota	Tectiliviricetes	Rowavirales	Adenoviridae	Mastadenovirus	Mastadenovirus bovidae	Bovine adenovirus	Bovine adenovirus 2	7086416	Run1	DNA	Animal	10% to 50%
D-Jamalpur-Sept1	HM999994.1	7374	1291	87	1.27104	17.5075	1.66491	Human papillomavirus type 142 isolate GH1302, complete genome	1070415	Viruses	Cossaviricota	Papovaviricetes	Zurhausenvirales	Papillomaviridae	Gammapapillomavirus	Gammapapillomavirus 10	Human papillomavirus 142	Human papillomavirus 142	7086416	Run1	DNA	Human	10% to 50%
D-Jamalpur-Sept2	L19443.1	34214	34214	243766	735.02	100	686.61	Human adenovirus F, complete genome	130309	Viruses	Preplasmiviricota	Tectiliviricetes	Rowavirales	Adenoviridae	Mastadenovirus	Human mastadenovirus F	unclassified Human mastadenovirus F subspecies/strain	unclassified Human mastadenovirus F strain	10376694	Run1	DNA	Human	Over 90%
D-Jamalpur-Sept2	V01108.1	5153	5102	36266	747.784	99.0103	678.235	Human BK virus (strain Dunlop) genome. (Closely related to SV40.)	1891762	Viruses	Cossaviricota	Papovaviricetes	Sepolyvirales	Polyomaviridae	Betapolyomavirus	Betapolyomavirus hominis	unclassified Betapolyomavirus hominis subspecies/strain	unclassified Betapolyomavirus hominis strain	10376694	Run1	DNA	Human	Over 90%
D-Jamalpur-Sept2	J02226.1	5130	5091	19228	398.225	99.2398	361.208	JC virus complete genome	10632	Viruses	Cossaviricota	Papovaviricetes	Sepolyvirales	Polyomaviridae	Betapolyomavirus	Betapolyomavirus secuhominis	JC polyomavirus	JC polyomavirus	10376694	Run1	DNA	Human	Over 90%
D-Jamalpur-Sept2	JQ326209.1	35153	31246	30785	91.1567	88.8857	84.3952	Human adenovirus 19, complete genome	28278	Viruses	Preplasmiviricota	Tectiliviricetes	Rowavirales	Adenoviridae	Mastadenovirus	Human mastadenovirus D	Human adenovirus 19	Human adenovirus 19	10376694	Run1	DNA	Human	50% to 90%
D-Jamalpur-Sept2	AB448776.1	35215	30320	21250	63.0308	86.0997	58.153	Human adenovirus 37 genomic DNA, complete genome, isolate: 1991	52275	Viruses	Preplasmiviricota	Tectiliviricetes	Rowavirales	Adenoviridae	Mastadenovirus	Human mastadenovirus D	Human adenovirus D37	Human adenovirus D37	10376694	Run1	DNA	Human	50% to 90%
D-Jamalpur-Sept2	AF108105.1	35100	28708	20777	61.7117	81.7892	57.0449	Human adenovirus type 17 complete genome	46922	Viruses	Preplasmiviricota	Tectiliviricetes	Rowavirales	Adenoviridae	Mastadenovirus	Human mastadenovirus D	Human adenovirus 17	Human adenovirus 17	10376694	Run1	DNA	Human	50% to 90%
D-Jamalpur-Sept2	KY316160.1	34169	27935	17098	50.4052	81.7554	48.223	Human adenovirus 41 isolate SH/2015/D16, complete genome	10524	Viruses	Preplasmiviricota	Tectiliviricetes	Rowavirales	Adenoviridae	Mastadenovirus	Human mastadenovirus F	Human adenovirus 41	Human adenovirus 41	10376694	Run1	DNA	Human	50% to 90%
D-Jamalpur-Sept2	KY489985.1	5200	2556	2079	42.9721	49.1538	38.5294	Porcine bocavirus 1 isolate JOA_011, complete genome	1048219	Viruses	Cossaviricota	Quintoviricetes	Piccovirales	Parvoviridae	Bocaparvovirus	Ungulate bocaparvovirus 2	Porcine bocavirus 1	Porcine bocavirus 1	10376694	Run1	DNA	Animal	10% to 50%
D-Jamalpur-Sept2	BK000400.1	33034	21293	6337	20.1307	64.4578	18.4869	TPA: Bovine adenovirus 2, complete genome	NA	Viruses	Preplasmiviricota	Tectiliviricetes	Rowavirales	Adenoviridae	Mastadenovirus	Mastadenovirus bovidae	Bovine adenovirus	Bovine adenovirus 2	10376694	Run1	DNA	Animal	50% to 90%
D-Jamalpur-Sept2	X70829.1	7308	4706	933	13.2517	64.3952	12.3034	Human papillomavirus type 65 complete genome	28312	Viruses	Cossaviricota	Papovaviricetes	Zurhausenvirales	Papillomaviridae	Gammapapillomavirus	Gammapapillomavirus 1	Human papillomavirus 65	Human papillomavirus 65	10376694	Run1	DNA	Human	50% to 90%
D-Jamalpur-Sept2	KX868289.2	33676	20620	3959	12.2845	61.2305	11.3294	Human adenovirus 12 isolate GyK010, complete genome	28282	Viruses	Preplasmiviricota	Tectiliviricetes	Rowavirales	Adenoviridae	Mastadenovirus	Human mastadenovirus A	Human adenovirus 12	Human adenovirus 12	10376694	Run1	DNA	Human	50% to 90%
D-Jamalpur-Sept2	KX384958.1	35250	19779	3889	11.3251	56.1106	10.6321	Human adenovirus B3 strain T382/Ft Jackson South Carolina USA/2002, complete genome	45659	Viruses	Preplasmiviricota	Tectiliviricetes	Rowavirales	Adenoviridae	Mastadenovirus	Human mastadenovirus B	Human adenovirus B3	Human adenovirus B3	10376694	Run1	DNA	Human	50% to 90%
D-Jamalpur-Sept2	AB746853.1	34978	12412	3131	8.97356	35.4852	8.62639	Human adenovirus 8 DNA, complete genome, strain: Trim variant	31545	Viruses	Preplasmiviricota	Tectiliviricetes	Rowavirales	Adenoviridae	Mastadenovirus	Human mastadenovirus D	Human adenovirus D8	Human adenovirus D8	10376694	Run1	DNA	Human	10% to 50%
D-Jamalpur-Sept2	M19296.1	5323	1653	386	7.85328	31.0539	6.9883	Canine parvovirus strain CPV-N, complete cds	10788	Viruses	Cossaviricota	Quintoviricetes	Piccovirales	Parvoviridae	Protoparvovirus	Carnivore protoparvovirus 1	Canine parvovirus	Canine parvovirus	10376694	Run1	DNA	Animal	10% to 50%
D-Jamalpur-Sept2	AF083975.2	45063	15932	3082	7.11502	35.3549	6.59103	Fowl adenovirus 9, complete genome	172864	Viruses	Preplasmiviricota	Tectiliviricetes	Rowavirales	Adenoviridae	Aviadenovirus	Fowl aviadenovirus D	Fowl adenovirus 9	Fowl adenovirus 9	10376694	Run1	DNA	Animal	10% to 50%
D-Jamalpur-Sept2	HM011556.1	5387	2280	286	5.78308	42.3241	5.11635	Merkel cell polyomavirus isolate R17b, complete genome	493803	Viruses	Cossaviricota	Papovaviricetes	Sepolyvirales	Polyomaviridae	Alphapolyomavirus	Alphapolyomavirus quintihominis	Merkel cell polyomavirus	Merkel cell polyomavirus	10376694	Run1	DNA	Human	10% to 50%
D-Jamalpur-Sept2	X70828.1	7348	3556	376	5.28869	48.3941	4.93128	Human papillomavirus type 63 complete genome	28311	Viruses	Cossaviricota	Papovaviricetes	Zurhausenvirales	Papillomaviridae	Mupapillomavirus	Mupapillomavirus 2	Human papillomavirus type 63	Human papillomavirus type 63	10376694	Run1	DNA	Human	10% to 50%
D-Jamalpur-Sept2	NC_001356.1	7815	1530	224	3.00809	19.5777	2.76223	Human papillomavirus - 1, complete genome	334203	Viruses	Cossaviricota	Papovaviricetes	Zurhausenvirales	Papillomaviridae	Mupapillomavirus	Mupapillomavirus 1	unclassified Mupapillomavirus 1 subspecies/strain	unclassified Mupapillomavirus 1 strain	10376694	Run1	DNA	Human	10% to 50%
D-Jamalpur-Sept2	AY189948.2	5335	1250	115	2.28602	23.4302	2.07732	Blattella germanica densovirus 1, complete genome	220638	Viruses	Cossaviricota	Quintoviricetes	Piccovirales	Parvoviridae	Blattambidensovirus	Blattodean blattambidensovirus 1	Blattella germanica densovirus 1	Blattella germanica densovirus 1	10376694	Run1	DNA	Insect	10% to 50%
D-Jamalpur-Sept2	GU117631.1	7182	1167	141	2.01991	16.249	1.89197	Human papillomavirus type 131, complete genome	909330	Viruses	Cossaviricota	Papovaviricetes	Zurhausenvirales	Papillomaviridae	Gammapapillomavirus	Gammapapillomavirus 14	Human papillomavirus type 131	Human papillomavirus type 131	10376694	Run1	DNA	Human	10% to 50%
D-Jamalpur-Sept2	Y15176.1	7427	1368	137	1.96647	18.4193	1.77766	Human papillomavirus type 80 E6, E7, E1, E2, E4, L2, and L1 genes	69987	Viruses	Cossaviricota	Papovaviricetes	Zurhausenvirales	Papillomaviridae	Betapapillomavirus	Betapapillomavirus 2	Human papillomavirus 80	Human papillomavirus 80	10376694	Run1	DNA	Human	10% to 50%
D-Jamalpur-Sept2	MF588756.1	7230	1074	131	1.88771	14.8548	1.74612	Gammapapillomavirus sp. isolate GammaiDysk6_wg1c05, complete genome	2049444	Viruses	Cossaviricota	Papovaviricetes	Zurhausenvirales	Papillomaviridae	Gammapapillomavirus	Gammapapillomavirus sp.	unclassified Gammapapillomavirus sp. subspecies/strain	unclassified Gammapapillomavirus sp. strain	10376694	Run1	DNA	Human	10% to 50%
D-Jamalpur-Sept2	AM749299.1	33763	3355	349	1.05992	9.93691	0.996151	Human adenovirus type 31 complete genome, serotype 31	10529	Viruses	Preplasmiviricota	Tectiliviricetes	Rowavirales	Adenoviridae	Mastadenovirus	Human mastadenovirus A	Human adenovirus 31	Human adenovirus 31	10376694	Run1	DNA	Human	LESS
D-Jamalpur-Sept2	MG712775.1	44454	1642	197	0.447747	3.69371	0.427067	Fowl adenovirus 8b isolate SD1356, complete genome	586029	Viruses	Preplasmiviricota	Tectiliviricetes	Rowavirales	Adenoviridae	Aviadenovirus	Fowl aviadenovirus E	Fowl adenovirus 8b	Fowl adenovirus 8b	10376694	Run1	DNA	Animal	LESS
D-Jamalpur-Sept2	AC_000007.1	35937	1551	151	0.429541	4.31589	0.404926	Human adenovirus 2, complete genome	10515	Viruses	Preplasmiviricota	Tectiliviricetes	Rowavirales	Adenoviridae	Mastadenovirus	Human mastadenovirus C	Human adenovirus 2	Human adenovirus 2	10376694	Run1	DNA	Human	LESS
D-Jamalpur-Sept2	AC_000017.1	36001	1410	99	0.280717	3.91656	0.26501	Human adenovirus type 1, complete genome	10533	Viruses	Preplasmiviricota	Tectiliviricetes	Rowavirales	Adenoviridae	Mastadenovirus	Human mastadenovirus C	Human adenovirus 1	Human adenovirus 1	10376694	Run1	DNA	Human	LESS
D-Jaspur-Sept2	J02226.1	5130	4977	2792	58.0143	97.0175	54.4441	JC virus complete genome	10632	Viruses	Cossaviricota	Papovaviricetes	Sepolyvirales	Polyomaviridae	Betapolyomavirus	Betapolyomavirus secuhominis	JC polyomavirus	JC polyomavirus	9996480	Run1	DNA	Human	Over 90%
D-Jaspur-Sept2	L19443.1	34214	33719	18308	55.1567	98.5532	53.5291	Human adenovirus F, complete genome	130309	Viruses	Preplasmiviricota	Tectiliviricetes	Rowavirales	Adenoviridae	Mastadenovirus	Human mastadenovirus F	unclassified Human mastadenovirus F subspecies/strain	unclassified Human mastadenovirus F strain	9996480	Run1	DNA	Human	Over 90%
D-Jaspur-Sept2	KY316160.1	34169	32318	12981	38.9974	94.5828	38.004	Human adenovirus 41 isolate SH/2015/D16, complete genome	10524	Viruses	Preplasmiviricota	Tectiliviricetes	Rowavirales	Adenoviridae	Mastadenovirus	Human mastadenovirus F	Human adenovirus 41	Human adenovirus 41	9996480	Run1	DNA	Human	Over 90%
D-Jaspur-Sept2	V01108.1	5153	4398	870	17.7332	85.3483	16.8893	Human BK virus (strain Dunlop) genome. (Closely related to SV40.)	1891762	Viruses	Cossaviricota	Papovaviricetes	Sepolyvirales	Polyomaviridae	Betapolyomavirus	Betapolyomavirus hominis	unclassified Betapolyomavirus hominis subspecies/strain	unclassified Betapolyomavirus hominis strain	9996480	Run1	DNA	Human	50% to 90%
D-Jaspur-Sept2	JQ326209.1	35153	15835	1284	3.83613	45.0459	3.65389	Human adenovirus 19, complete genome	28278	Viruses	Preplasmiviricota	Tectiliviricetes	Rowavirales	Adenoviridae	Mastadenovirus	Human mastadenovirus D	Human adenovirus 19	Human adenovirus 19	9996480	Run1	DNA	Human	10% to 50%
D-Jaspur-Sept2	AF108105.1	35100	12204	849	2.54043	34.7692	2.41966	Human adenovirus type 17 complete genome	46922	Viruses	Preplasmiviricota	Tectiliviricetes	Rowavirales	Adenoviridae	Mastadenovirus	Human mastadenovirus D	Human adenovirus 17	Human adenovirus 17	9996480	Run1	DNA	Human	10% to 50%
D-Jaspur-Sept2	KX868289.2	33676	3054	211	0.667064	9.06877	0.62678	Human adenovirus 12 isolate GyK010, complete genome	28282	Viruses	Preplasmiviricota	Tectiliviricetes	Rowavirales	Adenoviridae	Mastadenovirus	Human mastadenovirus A	Human adenovirus 12	Human adenovirus 12	9996480	Run1	DNA	Human	LESS
D-Jaspur-Sept2	AB746853.1	34978	3931	203	0.606064	11.2385	0.580569	Human adenovirus 8 DNA, complete genome, strain: Trim variant	31545	Viruses	Preplasmiviricota	Tectiliviricetes	Rowavirales	Adenoviridae	Mastadenovirus	Human mastadenovirus D	Human adenovirus D8	Human adenovirus D8	9996480	Run1	DNA	Human	10% to 50%
D-Jaspur-Sept2	AM749299.1	33763	2563	138	0.397584	7.59115	0.408875	Human adenovirus type 31 complete genome, serotype 31	10529	Viruses	Preplasmiviricota	Tectiliviricetes	Rowavirales	Adenoviridae	Mastadenovirus	Human mastadenovirus A	Human adenovirus 31	Human adenovirus 31	9996480	Run1	DNA	Human	LESS
D-Jaspur-Sept2	KX384958.1	35250	2435	126	0.36641	6.9078	0.357573	Human adenovirus B3 strain T382/Ft Jackson South Carolina USA/2002, complete genome	45659	Viruses	Preplasmiviricota	Tectiliviricetes	Rowavirales	Adenoviridae	Mastadenovirus	Human mastadenovirus B	Human adenovirus B3	Human adenovirus B3	9996480	Run1	DNA	Human	LESS
D-Kudasan-Sept1	V01108.1	5153	5148	545840	11202.5	99.903	8747.59	Human BK virus (strain Dunlop) genome. (Closely related to SV40.)	1891762	Viruses	Cossaviricota	Papovaviricetes	Sepolyvirales	Polyomaviridae	Betapolyomavirus	Betapolyomavirus hominis	unclassified Betapolyomavirus hominis subspecies/strain	unclassified Betapolyomavirus hominis strain	12109236	Run1	DNA	Human	Over 90%
D-Kudasan-Sept1	L19443.1	34214	34214	1511663	4577.99	100	3648.67	Human adenovirus F, complete genome	130309	Viruses	Preplasmiviricota	Tectiliviricetes	Rowavirales	Adenoviridae	Mastadenovirus	Human mastadenovirus F	unclassified Human mastadenovirus F subspecies/strain	unclassified Human mastadenovirus F strain	12109236	Run1	DNA	Human	Over 90%
D-Kudasan-Sept1	J02226.1	5130	5090	209659	4342.05	99.2203	3375.04	JC virus complete genome	10632	Viruses	Cossaviricota	Papovaviricetes	Sepolyvirales	Polyomaviridae	Betapolyomavirus	Betapolyomavirus secuhominis	JC polyomavirus	JC polyomavirus	12109236	Run1	DNA	Human	Over 90%
D-Kudasan-Sept1	KY316160.1	34169	34092	313198	937.513	99.7746	756.955	Human adenovirus 41 isolate SH/2015/D16, complete genome	10524	Viruses	Preplasmiviricota	Tectiliviricetes	Rowavirales	Adenoviridae	Mastadenovirus	Human mastadenovirus F	Human adenovirus 41	Human adenovirus 41	12109236	Run1	DNA	Human	Over 90%
D-Kudasan-Sept1	NC_001356.1	7815	7815	24117	323.227	100	254.846	Human papillomavirus - 1, complete genome	334203	Viruses	Cossaviricota	Papovaviricetes	Zurhausenvirales	Papillomaviridae	Mupapillomavirus	Mupapillomavirus 1	unclassified Mupapillomavirus 1 subspecies/strain	unclassified Mupapillomavirus 1 strain	12109236	Run1	DNA	Human	Over 90%
D-Kudasan-Sept1	FJ973560.1	4958	3716	6955	137.69	74.9496	115.844	Human bocavirus 2b NI strain HBoV2B-NI-213, complete genome	1511881	Viruses	Cossaviricota	Quintoviricetes	Piccovirales	Parvoviridae	Bocaparvovirus	Primate bocaparvovirus 2	Human bocavirus 2b NI	Human bocavirus 2b NI	12109236	Run1	DNA	Human	50% to 90%
D-Kudasan-Sept1	NC_012042.1	5196	3746	7278	141.424	72.0939	115.671	Human bocavirus 2c PK isolate PK-5510, complete genome	1511882	Viruses	Cossaviricota	Quintoviricetes	Piccovirales	Parvoviridae	Bocaparvovirus	Primate bocaparvovirus 2	Human bocavirus 2c PK	Human bocavirus 2c PK	12109236	Run1	DNA	Human	50% to 90%
D-Kudasan-Sept1	HM011556.1	5387	5343	7270	141.619	99.1832	111.448	Merkel cell polyomavirus isolate R17b, complete genome	493803	Viruses	Cossaviricota	Papovaviricetes	Sepolyvirales	Polyomaviridae	Alphapolyomavirus	Alphapolyomavirus quintihominis	Merkel cell polyomavirus	Merkel cell polyomavirus	12109236	Run1	DNA	Human	Over 90%
D-Kudasan-Sept1	X70829.1	7308	7303	6558	93.6164	99.9316	74.1065	Human papillomavirus type 65 complete genome	28312	Viruses	Cossaviricota	Papovaviricetes	Zurhausenvirales	Papillomaviridae	Gammapapillomavirus	Gammapapillomavirus 1	Human papillomavirus 65	Human papillomavirus 65	12109236	Run1	DNA	Human	Over 90%
D-Kudasan-Sept1	NC_012564.1	5242	3923	4625	86.7551	74.8378	72.8615	Human bocavirus 3, complete genome	638313	Viruses	Cossaviricota	Quintoviricetes	Piccovirales	Parvoviridae	Bocaparvovirus	Primate bocaparvovirus 1	Human bocavirus 3	Human bocavirus 3	12109236	Run1	DNA	Human	50% to 90%
D-Kudasan-Sept1	X70828.1	7348	7348	5942	85.2886	100	66.7801	Human papillomavirus type 63 complete genome	28311	Viruses	Cossaviricota	Papovaviricetes	Zurhausenvirales	Papillomaviridae	Mupapillomavirus	Mupapillomavirus 2	Human papillomavirus type 63	Human papillomavirus type 63	12109236	Run1	DNA	Human	Over 90%
D-Kudasan-Sept1	MF118167.1	3925	1943	2247	59.3642	49.5032	47.2766	Human fecal virus Jorvi2, complete genome	2017081	Viruses	Cressdnaviricota	Arfiviricetes	Cirlivirales	Circoviridae	unclassified Circoviridae genus	Human fecal virus Jorvi2	unclassified Human fecal virus Jorvi2 subspecies/strain	unclassified Human fecal virus Jorvi2 strain	12109236	Run1	DNA	Human	10% to 50%
D-Kudasan-Sept1	KX384958.1	35250	32898	16400	48.103	93.3277	38.4209	Human adenovirus B3 strain T382/Ft Jackson South Carolina USA/2002, complete genome	45659	Viruses	Preplasmiviricota	Tectiliviricetes	Rowavirales	Adenoviridae	Mastadenovirus	Human mastadenovirus B	Human adenovirus B3	Human adenovirus B3	12109236	Run1	DNA	Human	Over 90%
D-Kudasan-Sept1	JQ326209.1	35153	25656	16024	47.0173	72.9838	37.6437	Human adenovirus 19, complete genome	28278	Viruses	Preplasmiviricota	Tectiliviricetes	Rowavirales	Adenoviridae	Mastadenovirus	Human mastadenovirus D	Human adenovirus 19	Human adenovirus 19	12109236	Run1	DNA	Human	50% to 90%
D-Kudasan-Sept1	AF043303.1	4679	4045	1994	46.0484	86.4501	35.1929	Adeno-associated virus 2, complete genome	10804	Viruses	Cossaviricota	Quintoviricetes	Piccovirales	Parvoviridae	Dependoparvovirus	Adeno-associated dependoparvovirus A	adeno-associated virus 2	adeno-associated virus 2	12109236	Run1	DNA	Human	50% to 90%
D-Kudasan-Sept1	U31781.1	7324	7100	2178	30.8082	96.9416	24.558	Human papillomavirus type 23, complete genome	37955	Viruses	Cossaviricota	Papovaviricetes	Zurhausenvirales	Papillomaviridae	Betapapillomavirus	Betapapillomavirus 2	Human papillomavirus 23	Human papillomavirus 23	12109236	Run1	DNA	Human	Over 90%
D-Kudasan-Sept1	AB448776.1	35215	24041	9723	28.8297	68.2692	22.8011	Human adenovirus 37 genomic DNA, complete genome, isolate: 1991	52275	Viruses	Preplasmiviricota	Tectiliviricetes	Rowavirales	Adenoviridae	Mastadenovirus	Human mastadenovirus D	Human adenovirus D37	Human adenovirus D37	12109236	Run1	DNA	Human	50% to 90%
D-Kudasan-Sept1	AF108105.1	35100	23544	9361	27.788	67.0769	22.0241	Human adenovirus type 17 complete genome	46922	Viruses	Preplasmiviricota	Tectiliviricetes	Rowavirales	Adenoviridae	Mastadenovirus	Human mastadenovirus D	Human adenovirus 17	Human adenovirus 17	12109236	Run1	DNA	Human	50% to 90%
D-Kudasan-Sept1	S47266.1	5908	1829	1264	19.7942	30.958	17.6681	orf1...orf4 [Junonia coenia densovirus JcDNV, Genomic Complete, 4 genes, 5908 nt]	12524	Viruses	Cossaviricota	Quintoviricetes	Piccovirales	Parvoviridae	Ambidensovirus	Lepidopteran ambidensovirus 1	Junonia coenia densovirus	Junonia coenia densovirus	12109236	Run1	DNA	Insect	10% to 50%
D-Kudasan-Sept1	U31782.1	7452	6574	1443	20.3636	88.2179	15.991	Human papillomavirus type 24, complete genome	37956	Viruses	Cossaviricota	Papovaviricetes	Zurhausenvirales	Papillomaviridae	Betapapillomavirus	Betapapillomavirus 1	human papillomavirus 24	human papillomavirus 24	12109236	Run1	DNA	Human	50% to 90%
D-Kudasan-Sept1	Y15176.1	7427	6744	1309	18.3736	90.8038	14.5549	Human papillomavirus type 80 E6, E7, E1, E2, E4, L2, and L1 genes	69987	Viruses	Cossaviricota	Papovaviricetes	Zurhausenvirales	Papillomaviridae	Betapapillomavirus	Betapapillomavirus 2	Human papillomavirus 80	Human papillomavirus 80	12109236	Run1	DNA	Human	Over 90%
D-Kudasan-Sept1	AM749299.1	33763	26494	5011	15.4217	78.4705	12.2565	Human adenovirus type 31 complete genome, serotype 31	10529	Viruses	Preplasmiviricota	Tectiliviricetes	Rowavirales	Adenoviridae	Mastadenovirus	Human mastadenovirus A	Human adenovirus 31	Human adenovirus 31	12109236	Run1	DNA	Human	50% to 90%
D-Kudasan-Sept1	X74469.1	7427	5847	1070	15.3324	78.7263	11.8974	Human papillomavirus type 17 genomic DNA	10607	Viruses	Cossaviricota	Papovaviricetes	Zurhausenvirales	Papillomaviridae	Betapapillomavirus	Betapapillomavirus 2	Human papillomavirus 17	Human papillomavirus 17	12109236	Run1	DNA	Human	50% to 90%
D-Kudasan-Sept1	MF588745.1	7193	5585	1021	14.9358	77.6449	11.7219	Gammapapillomavirus 23 isolate Gamma23_m090c10, complete genome	1961680	Viruses	Cossaviricota	Papovaviricetes	Zurhausenvirales	Papillomaviridae	Gammapapillomavirus	Gammapapillomavirus 23	unclassified Gammapapillomavirus 23 subspecies/strain	unclassified Gammapapillomavirus 23 strain	12109236	Run1	DNA	Human	50% to 90%
D-Kudasan-Sept1	EU410348.1	7423	5678	1032	14.5608	76.492	11.4811	Human papillomavirus type 110, complete genome	518629	Viruses	Cossaviricota	Papovaviricetes	Zurhausenvirales	Papillomaviridae	Betapapillomavirus	Betapapillomavirus 2	Human papillomavirus 110	Human papillomavirus 110	12109236	Run1	DNA	Human	50% to 90%
D-Kudasan-Sept1	Y15174.1	7549	5716	987	13.655	75.7186	10.7972	Human papillomavirus type 76 E6, E7, E1, E2, E4, L2, and L1 genes	69985	Viruses	Cossaviricota	Papovaviricetes	Zurhausenvirales	Papillomaviridae	Betapapillomavirus	Betapapillomavirus 3	human papillomavirus 76	human papillomavirus 76	12109236	Run1	DNA	Human	50% to 90%
D-Kudasan-Sept1	GQ845444.1	7397	5040	915	12.9775	68.1357	10.2152	Human papillomavirus type 122, complete genome	765054	Viruses	Cossaviricota	Papovaviricetes	Zurhausenvirales	Papillomaviridae	Betapapillomavirus	Betapapillomavirus 2	Human papillomavirus 122	Human papillomavirus 122	12109236	Run1	DNA	Human	50% to 90%
D-Kudasan-Sept1	MF588686.1	7438	2605	898	72.3249	35.0229	9.97019	Betapapillomavirus 4 isolate Beta04_TVMGc2024, complete genome	334208	Viruses	Cossaviricota	Papovaviricetes	Zurhausenvirales	Papillomaviridae	Betapapillomavirus	Betapapillomavirus 4	unclassified Betapapillomavirus 4 subspecies/strain	unclassified Betapapillomavirus 4 strain	12109236	Run1	DNA	Human	10% to 50%
D-Kudasan-Sept1	NC_001802.1	9181	2922	1087	12.4208	31.8266	9.77739	Human immunodeficiency virus 1, complete genome	11676	Viruses	Artverviricota	Revtraviricetes	Ortervirales	Retroviridae	Lentivirus	Human immunodeficiency virus 1	unclassified Human immunodeficiency virus 1 subspecies/strain	unclassified Human immunodeficiency virus 1 strain	12109236	Run1	RNA	Human	10% to 50%
D-Kudasan-Sept1	U31786.1	7421	5637	841	11.5263	75.9601	9.35873	Human papillomavirus type 37, complete genome	37958	Viruses	Cossaviricota	Papovaviricetes	Zurhausenvirales	Papillomaviridae	Betapapillomavirus	Betapapillomavirus 2	Human papillomavirus 37	Human papillomavirus 37	12109236	Run1	DNA	Human	50% to 90%
D-Kudasan-Sept1	JX262162.1	4939	3473	555	11.8286	70.3179	9.27977	Human polyomavirus 10 isolate 10ww, complete genome	1208309	Viruses	Cossaviricota	Papovaviricetes	Sepolyvirales	Polyomaviridae	Deltapolyomavirus	Deltapolyomavirus decihominis	unclassified Deltapolyomavirus decihominis subspecies/strain	unclassified Deltapolyomavirus decihominis strain	12109236	Run1	DNA	Human	50% to 90%
D-Kudasan-Sept1	EU410349.1	7384	5056	819	11.6718	68.4724	9.15958	Human papillomavirus type 111, complete genome	518630	Viruses	Cossaviricota	Papovaviricetes	Zurhausenvirales	Papillomaviridae	Betapapillomavirus	Betapapillomavirus 2	Human papillomavirus 111	Human papillomavirus 111	12109236	Run1	DNA	Human	50% to 90%
D-Kudasan-Sept1	HF930491.1	7359	4841	758	10.9069	65.7834	8.50616	Human papillomavirus type 174 complete genome, isolate V001	1347832	Viruses	Cossaviricota	Papovaviricetes	Zurhausenvirales	Papillomaviridae	Betapapillomavirus	Betapapillomavirus 2	Human papillomavirus 174	Human papillomavirus 174	12109236	Run1	DNA	Human	50% to 90%
D-Kudasan-Sept1	X70827.1	7353	4394	679	9.57795	59.7579	7.62585	Human papillomavirus type 4 complete genome	10617	Viruses	Cossaviricota	Papovaviricetes	Zurhausenvirales	Papillomaviridae	Gammapapillomavirus	Gammapapillomavirus 1	Human papillomavirus 4	Human papillomavirus 4	12109236	Run1	DNA	Human	50% to 90%
D-Kudasan-Sept1	U31787.1	7400	4556	649	9.27338	61.5676	7.24263	Human papillomavirus type 38, complete genome	37959	Viruses	Cossaviricota	Papovaviricetes	Zurhausenvirales	Papillomaviridae	Betapapillomavirus	Betapapillomavirus 2	Human papillomavirus 38	Human papillomavirus 38	12109236	Run1	DNA	Human	50% to 90%
D-Kudasan-Sept1	X74464.1	7434	3575	639	9.44893	48.0899	7.09842	Human papillomavirus type 9 genomic DNA	10621	Viruses	Cossaviricota	Papovaviricetes	Zurhausenvirales	Papillomaviridae	Betapapillomavirus	Betapapillomavirus 2	Human papillomavirus 9	Human papillomavirus 9	12109236	Run1	DNA	Human	10% to 50%
D-Kudasan-Sept1	EF444549.1	5229	2836	449	8.84131	54.236	7.09106	WU Polyomavirus strain B0, complete genome	440266	Viruses	Cossaviricota	Papovaviricetes	Sepolyvirales	Polyomaviridae	Betapolyomavirus	Betapolyomavirus quartihominis	WU Polyomavirus	WU Polyomavirus	12109236	Run1	DNA	Human	50% to 90%
D-Kudasan-Sept1	KX868289.2	33676	18846	2890	8.91049	55.9627	7.08697	Human adenovirus 12 isolate GyK010, complete genome	28282	Viruses	Preplasmiviricota	Tectiliviricetes	Rowavirales	Adenoviridae	Mastadenovirus	Human mastadenovirus A	Human adenovirus 12	Human adenovirus 12	12109236	Run1	DNA	Human	50% to 90%
D-Kudasan-Sept1	U31790.1	7184	4257	616	8.96162	59.2567	7.08105	Human papillomavirus type 50, complete genome	40539	Viruses	Cossaviricota	Papovaviricetes	Zurhausenvirales	Papillomaviridae	Gammapapillomavirus	Gammapapillomavirus 3	Human papillomavirus type 50	Human papillomavirus type 50	12109236	Run1	DNA	Human	50% to 90%
D-Kudasan-Sept1	HM999999.1	7224	3868	610	8.81891	53.5437	6.97325	Human papillomavirus type 147 isolate GH659, complete genome	1070420	Viruses	Cossaviricota	Papovaviricetes	Zurhausenvirales	Papillomaviridae	Gammapapillomavirus	Gammapapillomavirus 8	human papillomavirus 147	human papillomavirus 147	12109236	Run1	DNA	Human	50% to 90%
D-Kudasan-Sept1	U31780.1	7368	4049	531	7.55957	54.9539	5.95152	Human papillomavirus type 22, complete genome	37954	Viruses	Cossaviricota	Papovaviricetes	Zurhausenvirales	Papillomaviridae	Betapapillomavirus	Betapapillomavirus 2	Human papillomavirus 22	Human papillomavirus 22	12109236	Run1	DNA	Human	50% to 90%
D-Kudasan-Sept1	FJ947080.1	7476	4750	535	7.48567	63.5367	5.90973	Human papillomavirus type 115 isolate GC02, complete genome	696746	Viruses	Cossaviricota	Papovaviricetes	Zurhausenvirales	Papillomaviridae	Betapapillomavirus	Betapapillomavirus 3	human papillomavirus 115	human papillomavirus 115	12109236	Run1	DNA	Human	50% to 90%
D-Kudasan-Sept1	L32896.1	6039	1623	429	7.4218	26.8753	5.86645	Galleria mellonella densovirus non-structural protein (NS) and capsid protein (VP1,VP2,VP3,VP4) genes, complete cds	37138	Viruses	Cossaviricota	Quintoviricetes	Piccovirales	Parvoviridae	Protoambidensovirus	Lepidopteran protoambidensovirus 1	Galleria mellonella densovirus	Galleria mellonella densovirus	12109236	Run1	DNA	Insect	10% to 50%
D-Kudasan-Sept1	FM955839.1	7380	3904	523	7.34232	52.8997	5.85233	Human papillomavirus type 100, complete genome	587349	Viruses	Cossaviricota	Papovaviricetes	Zurhausenvirales	Papillomaviridae	Betapapillomavirus	Betapapillomavirus 2	Human papillomavirus 100	Human papillomavirus 100	12109236	Run1	DNA	Human	50% to 90%
D-Kudasan-Sept1	Y15173.1	7537	3571	481	6.70245	47.3796	5.27023	Human papillomavirus type 75 E6, E7, E1, E2, E4, L2, and L1 genes	69984	Viruses	Cossaviricota	Papovaviricetes	Zurhausenvirales	Papillomaviridae	Betapapillomavirus	Betapapillomavirus 3	human papillomavirus 75	human papillomavirus 75	12109236	Run1	DNA	Human	10% to 50%
D-Kudasan-Sept1	MF588729.1	7339	3301	460	6.62373	44.9789	5.17612	Gammapapillomavirus 18 isolate Gamma18_EV03c188, complete genome	1513263	Viruses	Cossaviricota	Papovaviricetes	Zurhausenvirales	Papillomaviridae	Gammapapillomavirus	Gammapapillomavirus 18	unclassified Gammapapillomavirus 18 subspecies/strain	unclassified Gammapapillomavirus 18 strain	12109236	Run1	DNA	Human	10% to 50%
D-Kudasan-Sept1	GQ845442.1	7304	3595	445	6.33925	49.2196	5.03133	Human papillomavirus type 120, complete genome	765052	Viruses	Cossaviricota	Papovaviricetes	Zurhausenvirales	Papillomaviridae	Betapapillomavirus	Betapapillomavirus 2	Human papillomavirus 120	Human papillomavirus 120	12109236	Run1	DNA	Human	10% to 50%
D-Kudasan-Sept1	M32305.1	7726	4230	468	6.48693	54.7502	5.00235	Human papillomavirus type 47 (HPV-47) +-sense strand	10594	Viruses	Cossaviricota	Papovaviricetes	Zurhausenvirales	Papillomaviridae	Betapapillomavirus	Betapapillomavirus 1	human papillomavirus 47	human papillomavirus 47	12109236	Run1	DNA	Human	50% to 90%
D-Kudasan-Sept1	FM955842.1	7412	3678	442	6.45153	49.6222	4.92459	Human papillomavirus type 113, complete genome	587351	Viruses	Cossaviricota	Papovaviricetes	Zurhausenvirales	Papillomaviridae	Betapapillomavirus	Betapapillomavirus 2	Human papillomavirus 113	Human papillomavirus 113	12109236	Run1	DNA	Human	10% to 50%
D-Kudasan-Sept1	MF588708.1	7273	2579	415	5.99509	35.4599	4.71214	Gammapapillomavirus 8 isolate Gamma08_w20c01b, complete genome	1175850	Viruses	Cossaviricota	Papovaviricetes	Zurhausenvirales	Papillomaviridae	Gammapapillomavirus	Gammapapillomavirus 8	unclassified Gammapapillomavirus 8 subspecies/strain	unclassified Gammapapillomavirus 8 strain	12109236	Run1	DNA	Human	10% to 50%
D-Kudasan-Sept1	X01457.1	5176	1242	289	6.00756	23.9954	4.61091	Parvovirus h-1, complete genome	10799	Viruses	Cossaviricota	Quintoviricetes	Piccovirales	Parvoviridae	Protoparvovirus	Rodent protoparvovirus 1	H-1 parvovirus	H-1 parvovirus	12109236	Run1	DNA	Human	10% to 50%
D-Kudasan-Sept1	KU248828.1	7262	3254	382	5.48988	44.8086	4.34401	Papillomavirus JL74, complete genome	1846251	Viruses	Cossaviricota	Papovaviricetes	Zurhausenvirales	Papillomaviridae	Gammapapillomavirus	Gammapapillomavirus 13	Papillomavirus JL74	Papillomavirus JL74	12109236	Run1	DNA	Animal	10% to 50%
D-Kudasan-Sept1	GU989205.1	5232	2642	273	5.43211	50.4969	4.30902	Trichodysplasia spinulosa-associated polyomavirus, complete genome	862909	Viruses	Cossaviricota	Papovaviricetes	Sepolyvirales	Polyomaviridae	Alphapolyomavirus	Alphapolyomavirus octihominis	Trichodysplasia spinulosa-associated polyomavirus	Trichodysplasia spinulosa-associated polyomavirus	12109236	Run1	DNA	Human	50% to 90%
D-Kudasan-Sept1	MF588756.1	7230	3677	376	5.4411	50.8575	4.2947	Gammapapillomavirus sp. isolate GammaiDysk6_wg1c05, complete genome	2049444	Viruses	Cossaviricota	Papovaviricetes	Zurhausenvirales	Papillomaviridae	Gammapapillomavirus	Gammapapillomavirus sp.	unclassified Gammapapillomavirus sp. subspecies/strain	unclassified Gammapapillomavirus sp. strain	12109236	Run1	DNA	Human	50% to 90%
D-Kudasan-Sept1	NC_012729.2	5104	1584	259	3.36476	31.0345	4.19056	Human bocavirus 4 NI strain HBoV4-NI-385, complete genome	1511883	Viruses	Cossaviricota	Quintoviricetes	Piccovirales	Parvoviridae	Bocaparvovirus	Primate bocaparvovirus 2	Human bocavirus 4 NI	Human bocavirus 4 NI	12109236	Run1	DNA	Human	10% to 50%
D-Kudasan-Sept1	KR816170.1	7416	3986	367	5.17892	53.7487	4.08676	Human papillomavirus type 182 isolate ACS214, complete genome	1851125	Viruses	Cossaviricota	Papovaviricetes	Zurhausenvirales	Papillomaviridae	Betapapillomavirus	Betapapillomavirus 2	Human papillomavirus type 182	Human papillomavirus type 182	12109236	Run1	DNA	Human	50% to 90%
D-Kudasan-Sept1	HM999997.1	7375	3102	336	4.63958	42.061	3.76236	Human papillomavirus type 145 isolate CL4112, complete genome	1070418	Viruses	Cossaviricota	Papovaviricetes	Zurhausenvirales	Papillomaviridae	Betapapillomavirus	Betapapillomavirus 2	Human papillomavirus 145	Human papillomavirus 145	12109236	Run1	DNA	Human	10% to 50%
D-Kudasan-Sept1	X74480.1	7560	3174	339	4.73495	41.9841	3.70306	Human papillomavirus type 49 genomic DNA	10616	Viruses	Cossaviricota	Papovaviricetes	Zurhausenvirales	Papillomaviridae	Betapapillomavirus	Betapapillomavirus 3	Human papillomavirus type 49	Human papillomavirus type 49	12109236	Run1	DNA	Human	10% to 50%
D-Kudasan-Sept1	HM011560.1	4926	1759	220	4.67965	35.7085	3.68818	Polyomavirus HPyV6 isolate 607a, complete genome	746830	Viruses	Cossaviricota	Papovaviricetes	Sepolyvirales	Polyomaviridae	Deltapolyomavirus	Deltapolyomavirus sextihominis	Human polyomavirus 6	Human polyomavirus 6	12109236	Run1	DNA	Human	10% to 50%
D-Kudasan-Sept1	GU233853.1	7219	2778	317	4.58481	38.4818	3.62631	Human papillomavirus type 129, complete genome	931210	Viruses	Cossaviricota	Papovaviricetes	Zurhausenvirales	Papillomaviridae	Gammapapillomavirus	Gammapapillomavirus 9	Human papillomavirus type 129	Human papillomavirus type 129	12109236	Run1	DNA	Human	10% to 50%
D-Kudasan-Sept1	JX413105.1	7252	2773	310	4.45438	38.2377	3.5301	Human papillomavirus type 169 isolate KC6, complete genome	1315260	Viruses	Cossaviricota	Papovaviricetes	Zurhausenvirales	Papillomaviridae	Gammapapillomavirus	Gammapapillomavirus 11	Human papillomavirus 169	Human papillomavirus 169	12109236	Run1	DNA	Human	10% to 50%
D-Kudasan-Sept1	AB746853.1	34978	8281	1366	3.96331	23.6749	3.22507	Human adenovirus 8 DNA, complete genome, strain: Trim variant	31545	Viruses	Preplasmiviricota	Tectiliviricetes	Rowavirales	Adenoviridae	Mastadenovirus	Human mastadenovirus D	Human adenovirus D8	Human adenovirus D8	12109236	Run1	DNA	Human	10% to 50%
D-Kudasan-Sept1	KR816179.1	7244	2320	280	3.99803	32.0265	3.192	Human papillomavirus 192 isolate ACS142, complete genome	1851217	Viruses	Cossaviricota	Papovaviricetes	Zurhausenvirales	Papillomaviridae	Gammapapillomavirus	Gammapapillomavirus 15	Human papillomavirus 192	Human papillomavirus 192	12109236	Run1	DNA	Human	10% to 50%
D-Kudasan-Sept1	NC_007455.1	5299	1288	204	4.25422	24.3065	3.17921	Primate bocaparvovirus 1 isolate st2, complete genome	1511871	Viruses	Cossaviricota	Quintoviricetes	Piccovirales	Parvoviridae	Bocaparvovirus	Primate bocaparvovirus 1	unclassified Primate bocaparvovirus 1 subspecies/strain	unclassified Primate bocaparvovirus 1 strain	12109236	Run1	DNA	Animal	10% to 50%
D-Kudasan-Sept1	MF588719.1	7110	2205	262	3.91609	31.0127	3.04309	Gammapapillomavirus 12 isolate Gamma12_w23c77, complete genome	1513257	Viruses	Cossaviricota	Papovaviricetes	Zurhausenvirales	Papillomaviridae	Gammapapillomavirus	Gammapapillomavirus 12	unclassified Gammapapillomavirus 12 subspecies/strain	unclassified Gammapapillomavirus 12 strain	12109236	Run1	DNA	Human	10% to 50%
D-Kudasan-Sept1	EU233812.1	4139	1019	150	3.59263	24.6195	2.99281	Anopheles gambiae densonucleosis virus, complete genome	487311	Viruses	Cossaviricota	Quintoviricetes	Piccovirales	Parvoviridae	Brevihamaparvovirus	Dipteran brevihamaparvovirus 1	Anopheles gambiae densovirus	Anopheles gambiae densovirus	12109236	Run1	DNA	Insect	10% to 50%
D-Kudasan-Sept1	MF588782.1	4152	1140	150	3.96077	27.4566	2.98344	Gammapapillomavirus 22 isolate iGamma22_m090c255 E7 (E7), E1 (E1), E2 (E2), and E4 (E4) genes, complete cds	1961679	Viruses	Cossaviricota	Papovaviricetes	Zurhausenvirales	Papillomaviridae	Gammapapillomavirus	Gammapapillomavirus 22	unclassified Gammapapillomavirus 22 subspecies/strain	unclassified Gammapapillomavirus 22 strain	12109236	Run1	DNA	Human	10% to 50%
D-Kudasan-Sept1	MF588720.1	7142	2527	256	3.79734	35.3822	2.96008	Gammapapillomavirus 12 isolate Gamma12_w34c11a, complete genome	1513257	Viruses	Cossaviricota	Papovaviricetes	Zurhausenvirales	Papillomaviridae	Gammapapillomavirus	Gammapapillomavirus 12	unclassified Gammapapillomavirus 12 subspecies/strain	unclassified Gammapapillomavirus 12 strain	12109236	Run1	DNA	Human	10% to 50%
D-Kudasan-Sept1	X74468.1	7412	2429	261	3.62462	32.7712	2.90796	Human papillomavirus type 15 genomic DNA	10606	Viruses	Cossaviricota	Papovaviricetes	Zurhausenvirales	Papillomaviridae	Betapapillomavirus	Betapapillomavirus 2	Human papillomavirus 15	Human papillomavirus 15	12109236	Run1	DNA	Human	10% to 50%
D-Kudasan-Sept1	JX429973.1	7329	2295	258	3.66249	31.314	2.90709	Human papillomavirus type 156 isolate GC01, complete genome	1248396	Viruses	Cossaviricota	Papovaviricetes	Zurhausenvirales	Papillomaviridae	Gammapapillomavirus	Gammapapillomavirus 18	Human papillomavirus type 156	Human papillomavirus type 156	12109236	Run1	DNA	Human	10% to 50%
D-Kudasan-Sept1	GQ246950.1	7895	1510	270	3.04261	19.126	2.8242	Human papillomavirus type 117 clone K6, complete genome	720708	Viruses	Cossaviricota	Papovaviricetes	Zurhausenvirales	Papillomaviridae	Alphapapillomavirus	Alphapapillomavirus 2	Human papillomavirus 117	Human papillomavirus 117	12109236	Run1	DNA	Human	10% to 50%
D-Kudasan-Sept1	U31789.1	7100	2609	240	3.54863	36.7465	2.79149	Human papillomavirus type 48, complete genome	40538	Viruses	Cossaviricota	Papovaviricetes	Zurhausenvirales	Papillomaviridae	Gammapapillomavirus	Gammapapillomavirus 2	Human papillomavirus type 48	Human papillomavirus type 48	12109236	Run1	DNA	Human	10% to 50%
D-Kudasan-Sept1	HM999987.1	7293	3024	246	3.47851	41.4644	2.78556	Human papillomavirus type 135 isolate NJ3500, complete genome	1070408	Viruses	Cossaviricota	Papovaviricetes	Zurhausenvirales	Papillomaviridae	Gammapapillomavirus	Gammapapillomavirus 15	Human papillomavirus 135	Human papillomavirus 135	12109236	Run1	DNA	Human	10% to 50%
D-Kudasan-Sept1	HE963025.1	7443	2636	246	3.53051	35.4158	2.72942	Human papillomavirus type 159 complete genome, isolate SIBX8	1209820	Viruses	Cossaviricota	Papovaviricetes	Zurhausenvirales	Papillomaviridae	Betapapillomavirus	Betapapillomavirus 2	Human papillomavirus 159	Human papillomavirus 159	12109236	Run1	DNA	Human	10% to 50%
D-Kudasan-Sept1	MF588734.1	7214	2132	233	3.44465	29.5536	2.66725	Gammapapillomavirus 22 isolate Gamma22_do1c02, complete genome	1961679	Viruses	Cossaviricota	Papovaviricetes	Zurhausenvirales	Papillomaviridae	Gammapapillomavirus	Gammapapillomavirus 22	unclassified Gammapapillomavirus 22 subspecies/strain	unclassified Gammapapillomavirus 22 strain	12109236	Run1	DNA	Human	10% to 50%
D-Kudasan-Sept1	FM955837.2	7466	2088	241	3.38286	27.9668	2.66571	Human papillomavirus type 98, complete genome	587347	Viruses	Cossaviricota	Papovaviricetes	Zurhausenvirales	Papillomaviridae	Betapapillomavirus	Betapapillomavirus 1	Human papillomavirus 98	Human papillomavirus 98	12109236	Run1	DNA	Human	10% to 50%
D-Kudasan-Sept1	AY443350.1	15690	1746	487	3.29389	11.1281	2.56324	Canine distemper virus isolate 00-2601, complete genome	11232	Viruses	Negarnaviricota	Monjiviricetes	Mononegavirales	Paramyxoviridae	Morbillivirus	Canine morbillivirus	unclassified Canine morbillivirus subspecies/strain	unclassified Canine morbillivirus strain	12109236	Run1	RNA	Animal	10% to 50%
D-Kudasan-Sept1	FN677755.1	7436	2504	224	3.02251	33.674	2.48766	Human papillomavirus type 150, complete genome, isolate SIBX1	743811	Viruses	Cossaviricota	Papovaviricetes	Zurhausenvirales	Papillomaviridae	Betapapillomavirus	Betapapillomavirus 5	human papillomavirus 150	human papillomavirus 150	12109236	Run1	DNA	Human	10% to 50%
D-Kudasan-Sept1	MF588688.1	7257	1737	214	3.13015	23.9355	2.43523	Gammapapillomavirus sp. isolate Gamma_LCOSOc196, complete genome	2049444	Viruses	Cossaviricota	Papovaviricetes	Zurhausenvirales	Papillomaviridae	Gammapapillomavirus	Gammapapillomavirus sp.	unclassified Gammapapillomavirus sp. subspecies/strain	unclassified Gammapapillomavirus sp. strain	12109236	Run1	DNA	Human	10% to 50%
D-Kudasan-Sept1	MF588718.1	7142	2737	210	2.87972	38.3226	2.42819	Gammapapillomavirus 12 isolate Gamma12_w11c13, complete genome	1513257	Viruses	Cossaviricota	Papovaviricetes	Zurhausenvirales	Papillomaviridae	Gammapapillomavirus	Gammapapillomavirus 12	unclassified Gammapapillomavirus 12 subspecies/strain	unclassified Gammapapillomavirus 12 strain	12109236	Run1	DNA	Human	10% to 50%
D-Kudasan-Sept1	GQ845445.1	7329	1591	213	3.11798	21.7083	2.40004	Human papillomavirus type 123, complete genome	765055	Viruses	Cossaviricota	Papovaviricetes	Zurhausenvirales	Papillomaviridae	Gammapapillomavirus	Gammapapillomavirus 7	Human papillomavirus 123	Human papillomavirus 123	12109236	Run1	DNA	Human	10% to 50%
[truncated: 147,238 more rows]

## Sheet: S3
Table S3. Primers and probes for Rotavirus A validation using dPCR.
Primers	Sequences
RotaA-F	5’-CAGTGGTTGATGCTCAAGATGGA-3’
RotaA-R	5’-TCATTGTAATCATATTGAATACCCA-3’
Probe	5’-/FAM/ACAACTGCAGCTTCAAAAGAAGWGT/BHQ1/-3’

## Sheet: S4
Table S4. Description of Sites and type of station along with geographic coordinates. The area covered in km2 and population as per the census data of 2011.
[truncated: 25 more rows]
