# Supplementary material for: Towards a Comprehensive Wastewater Virome Atlas for Pathogen Monitoring
Source: Research Square preprint supplement (doi:10.21203/rs.3.rs-8093831/v1), 2025-11-17
Supplement: Supplementary file 2 [file fdec87d17eee6a86d2309aec.docx]

**Supplementary Information**

**Towards a Comprehensive Wastewater Virome Atlas for Pathogen Monitoring**

Nitin Shukla1,2, Jinal Thakor1, Priyank Chavda1,Harshal Purohit1, Harshil Patel1, Saurabh Thakar3, Aesha Raval3, Jinal Prajapati3, Jay Solanki3, Deeparati Datta3,Harshita karri3, Abhijeet Mondal3, Niraj Singh1, Snehal Bagatharia1,Chaitanya Joshi1,Madhvi Joshi1*, Chandrashekar Mootapally2*,Varun Shah3*, Ramesh Pandit1*

*1Gujarat Biotechnology Research Centre (GBRC), Department of Science and Technology, Government of Gujarat, Gandhinagar-382010 India.*

*2GTU-School of Applied Sciences and Technology (GTU-SAST), Gujarat Technological University, Ahmedabad, Gujarat, India.*

*3Gujarat Biotechnology University, Nr. Gujarat International Finance Tec-City, Gandhinagar-382355, Gujarat, India.*

**Corresponding authors*

**Dr. Ramesh Pandit**Scientist-B,
Gujarat Biotechnology Research Centre
Department of Science and Technology
Govt. of Gujarat, Gandhinagar, Gujarat-382011, India
Email: [ramesh.scib@gbrc.res.in](mailto:ramesh.scib@gbrc.res.in)

**Dr. Varun Shah**

Assistant Professor,

Gujarat Biotechnology University,

Gandhinagar, Gujarat, India

Email: varun.shah@gbu.edu.in

**Dr. Chandrashekar Mootapally**Assistant Professor,
School of Applied Sciences and Technology (SAST-GTU),
Gujarat Technological University
Ahmedabad-382424, Gujarat, India
Email: chandu.avi@gmail.com

**Dr. Madhvi Joshi**Scientist-D,
Gujarat Biotechnology Research Centre
Department of Science and Technology
Govt. of Gujarat, Gandhinagar, Gujarat-382011, India
Email: madhvimicrobio@gmail.com


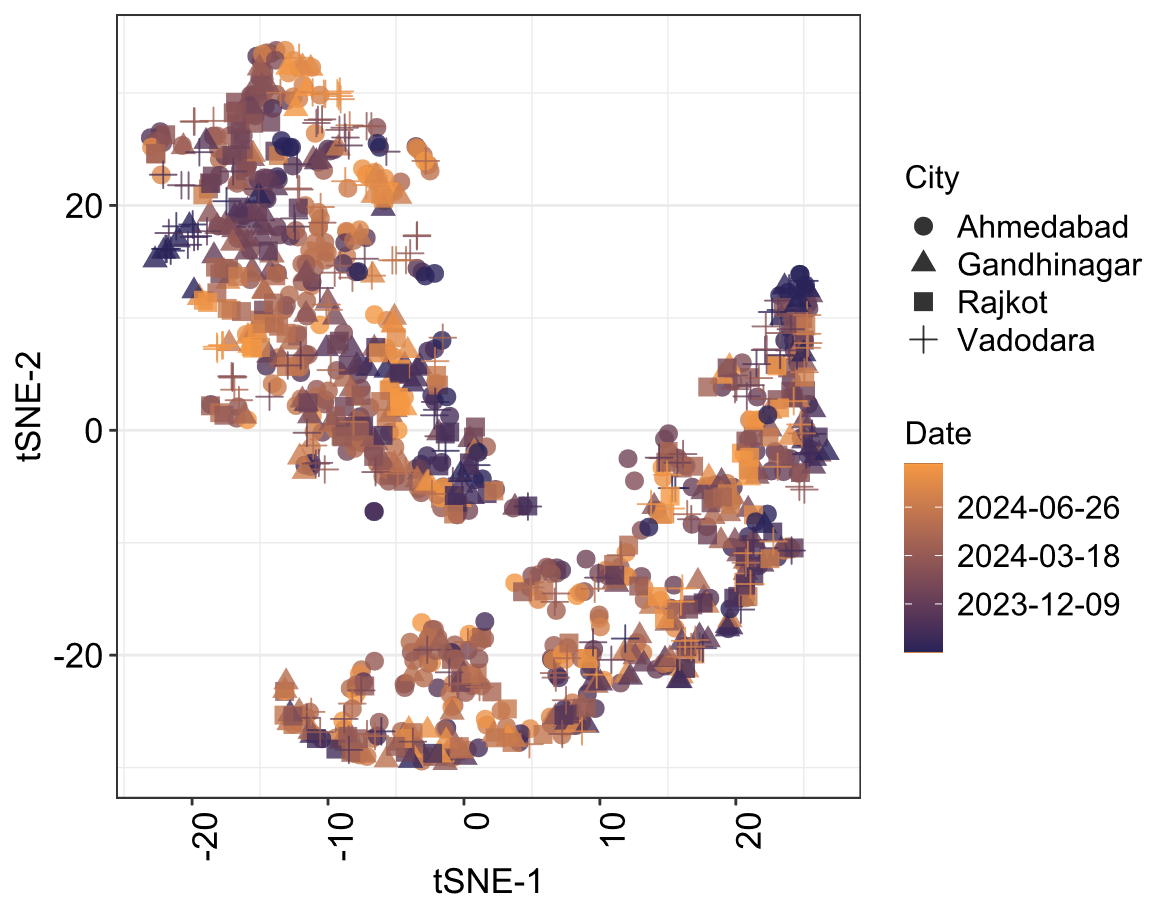

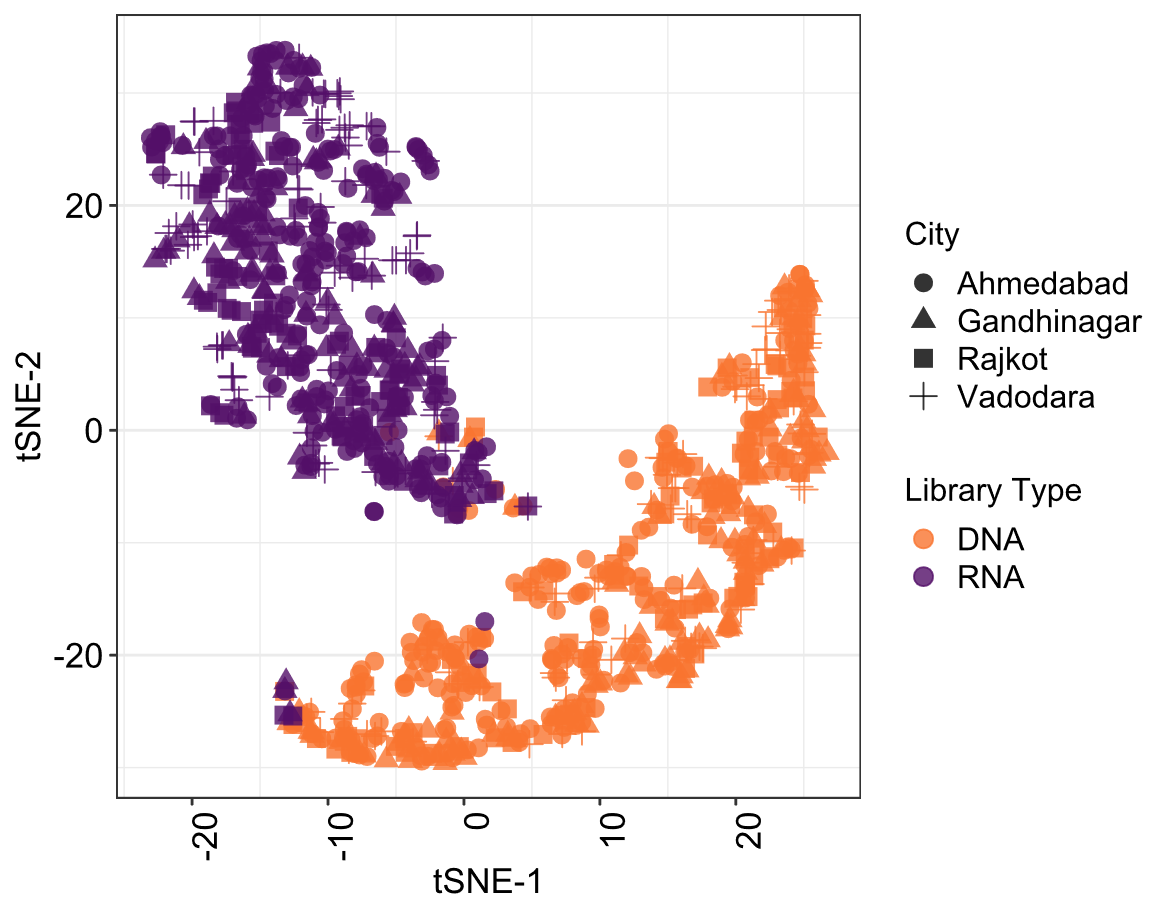


**Figure S1.** t-distributed Stochastic Neighbor Embedding (t-SNE) plots for (A) DNA libraries and (B) RNA libraries, visualized at the city level, and across different time points.


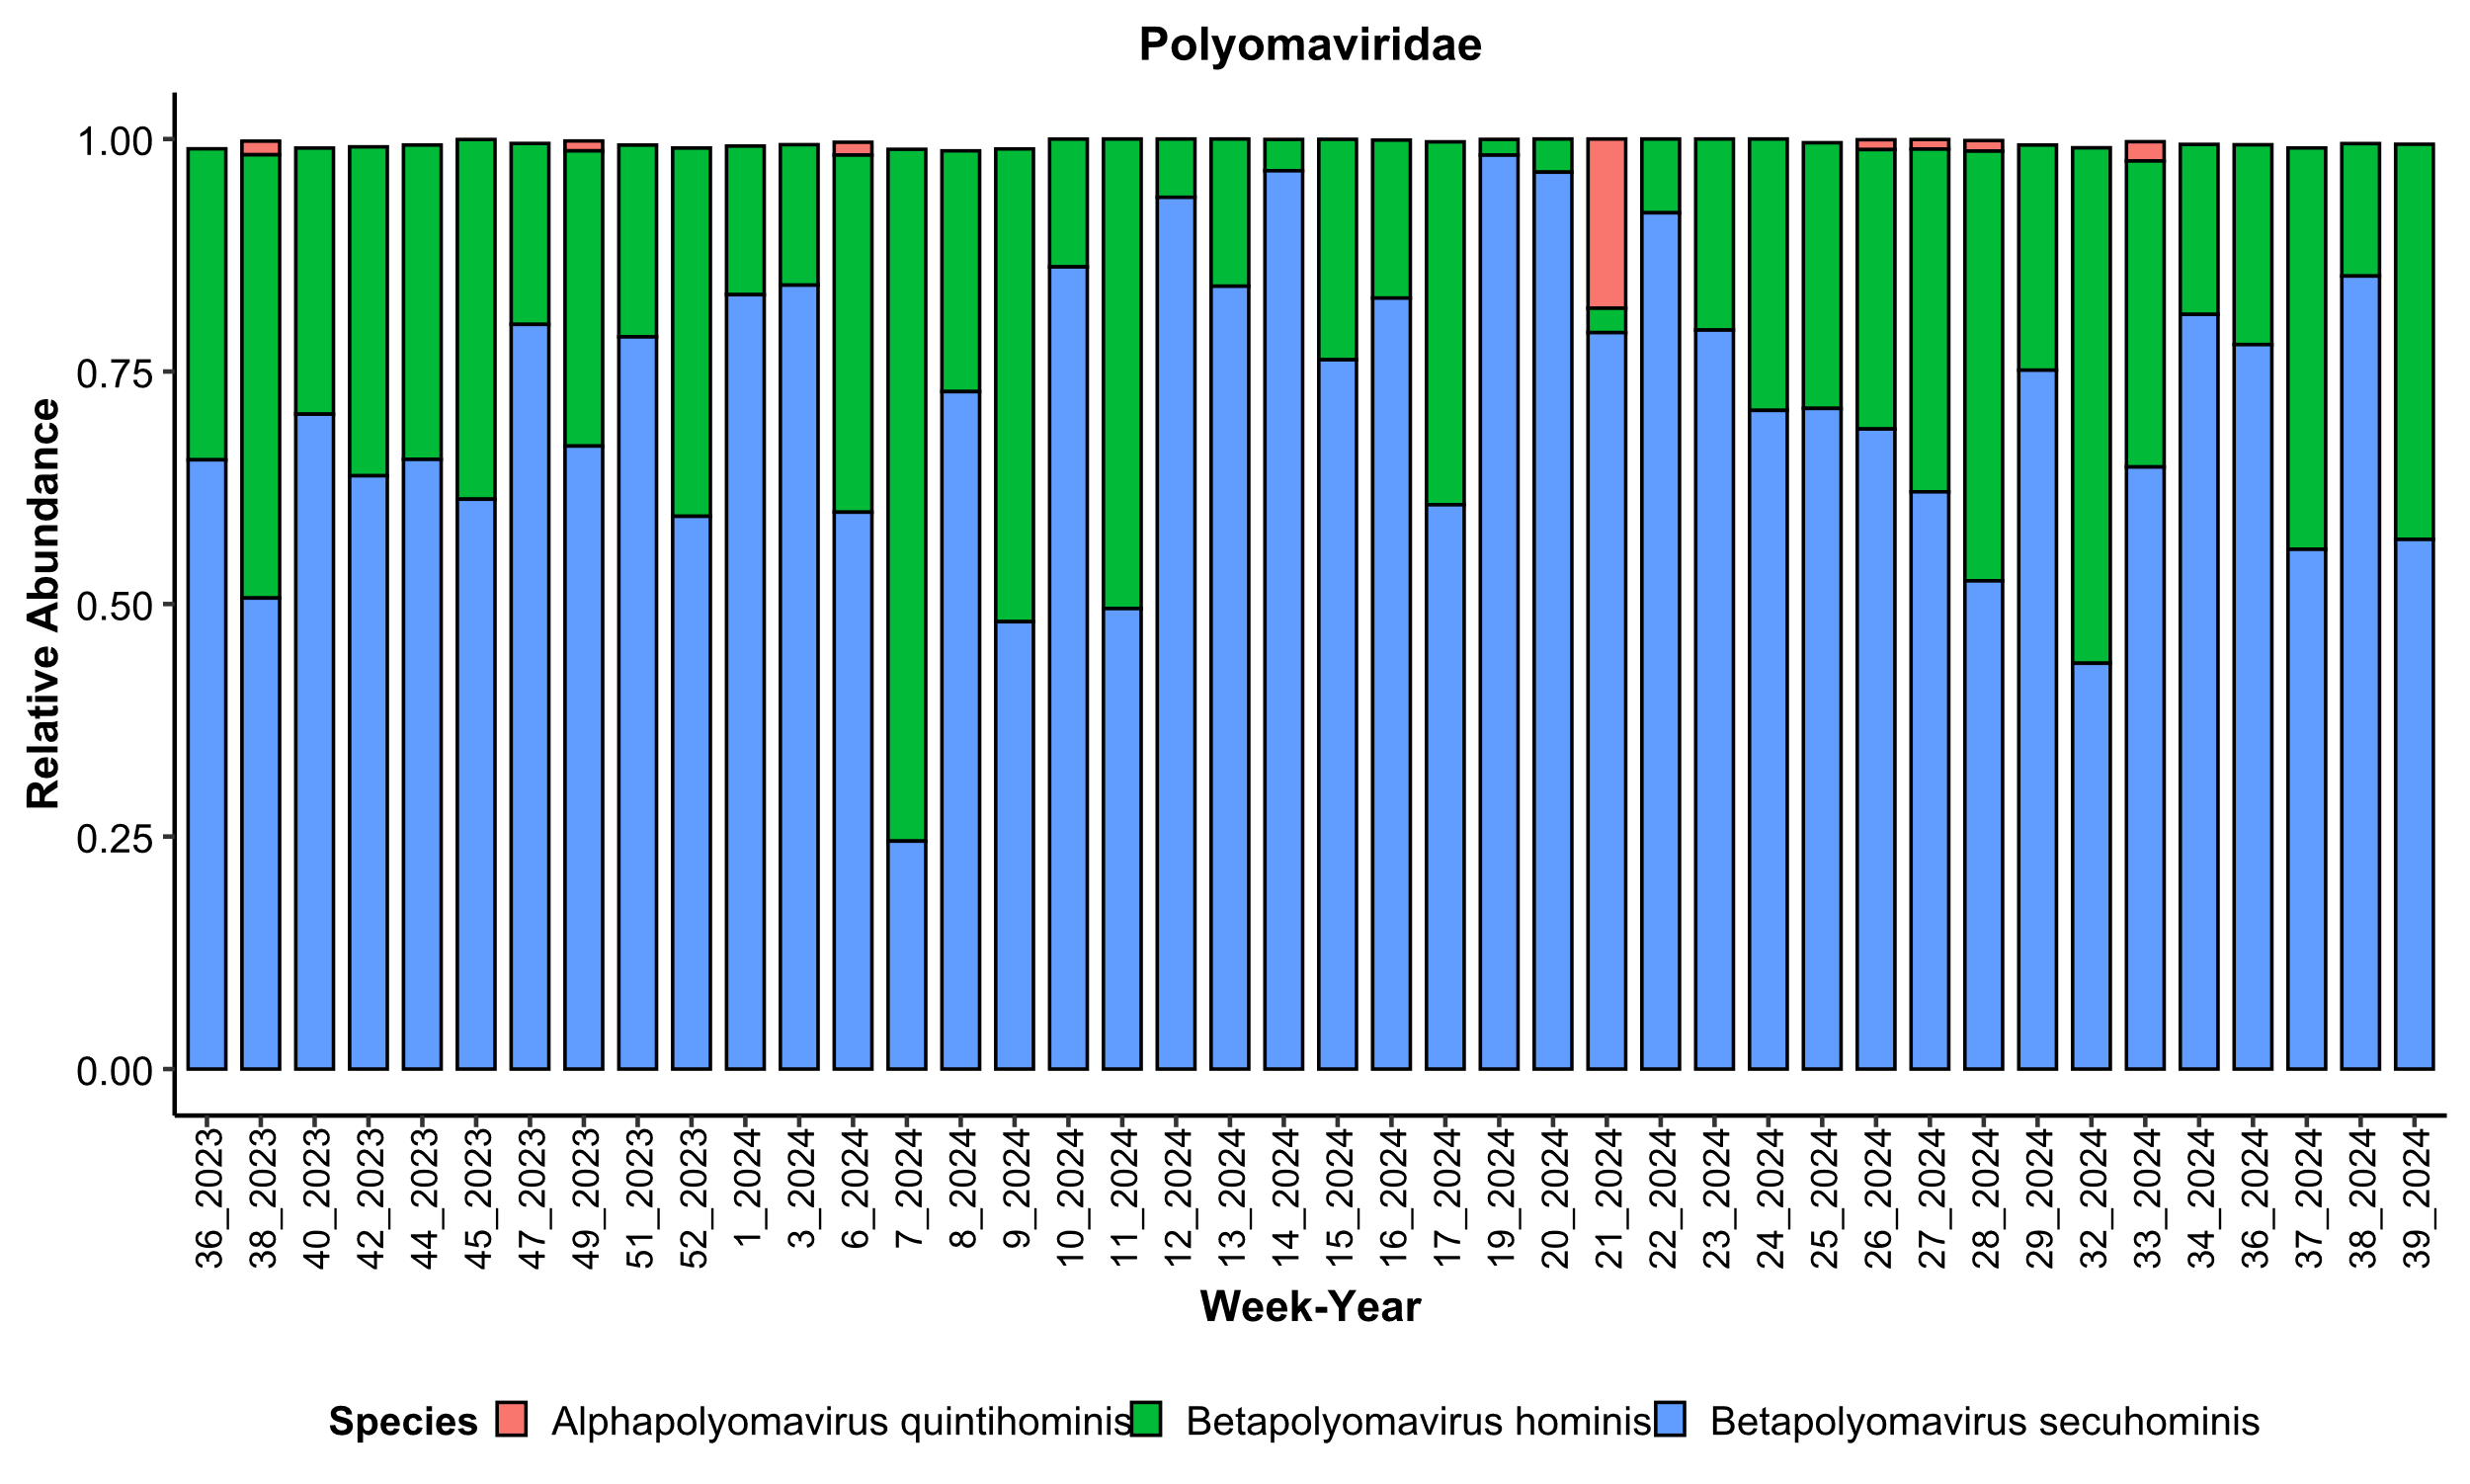

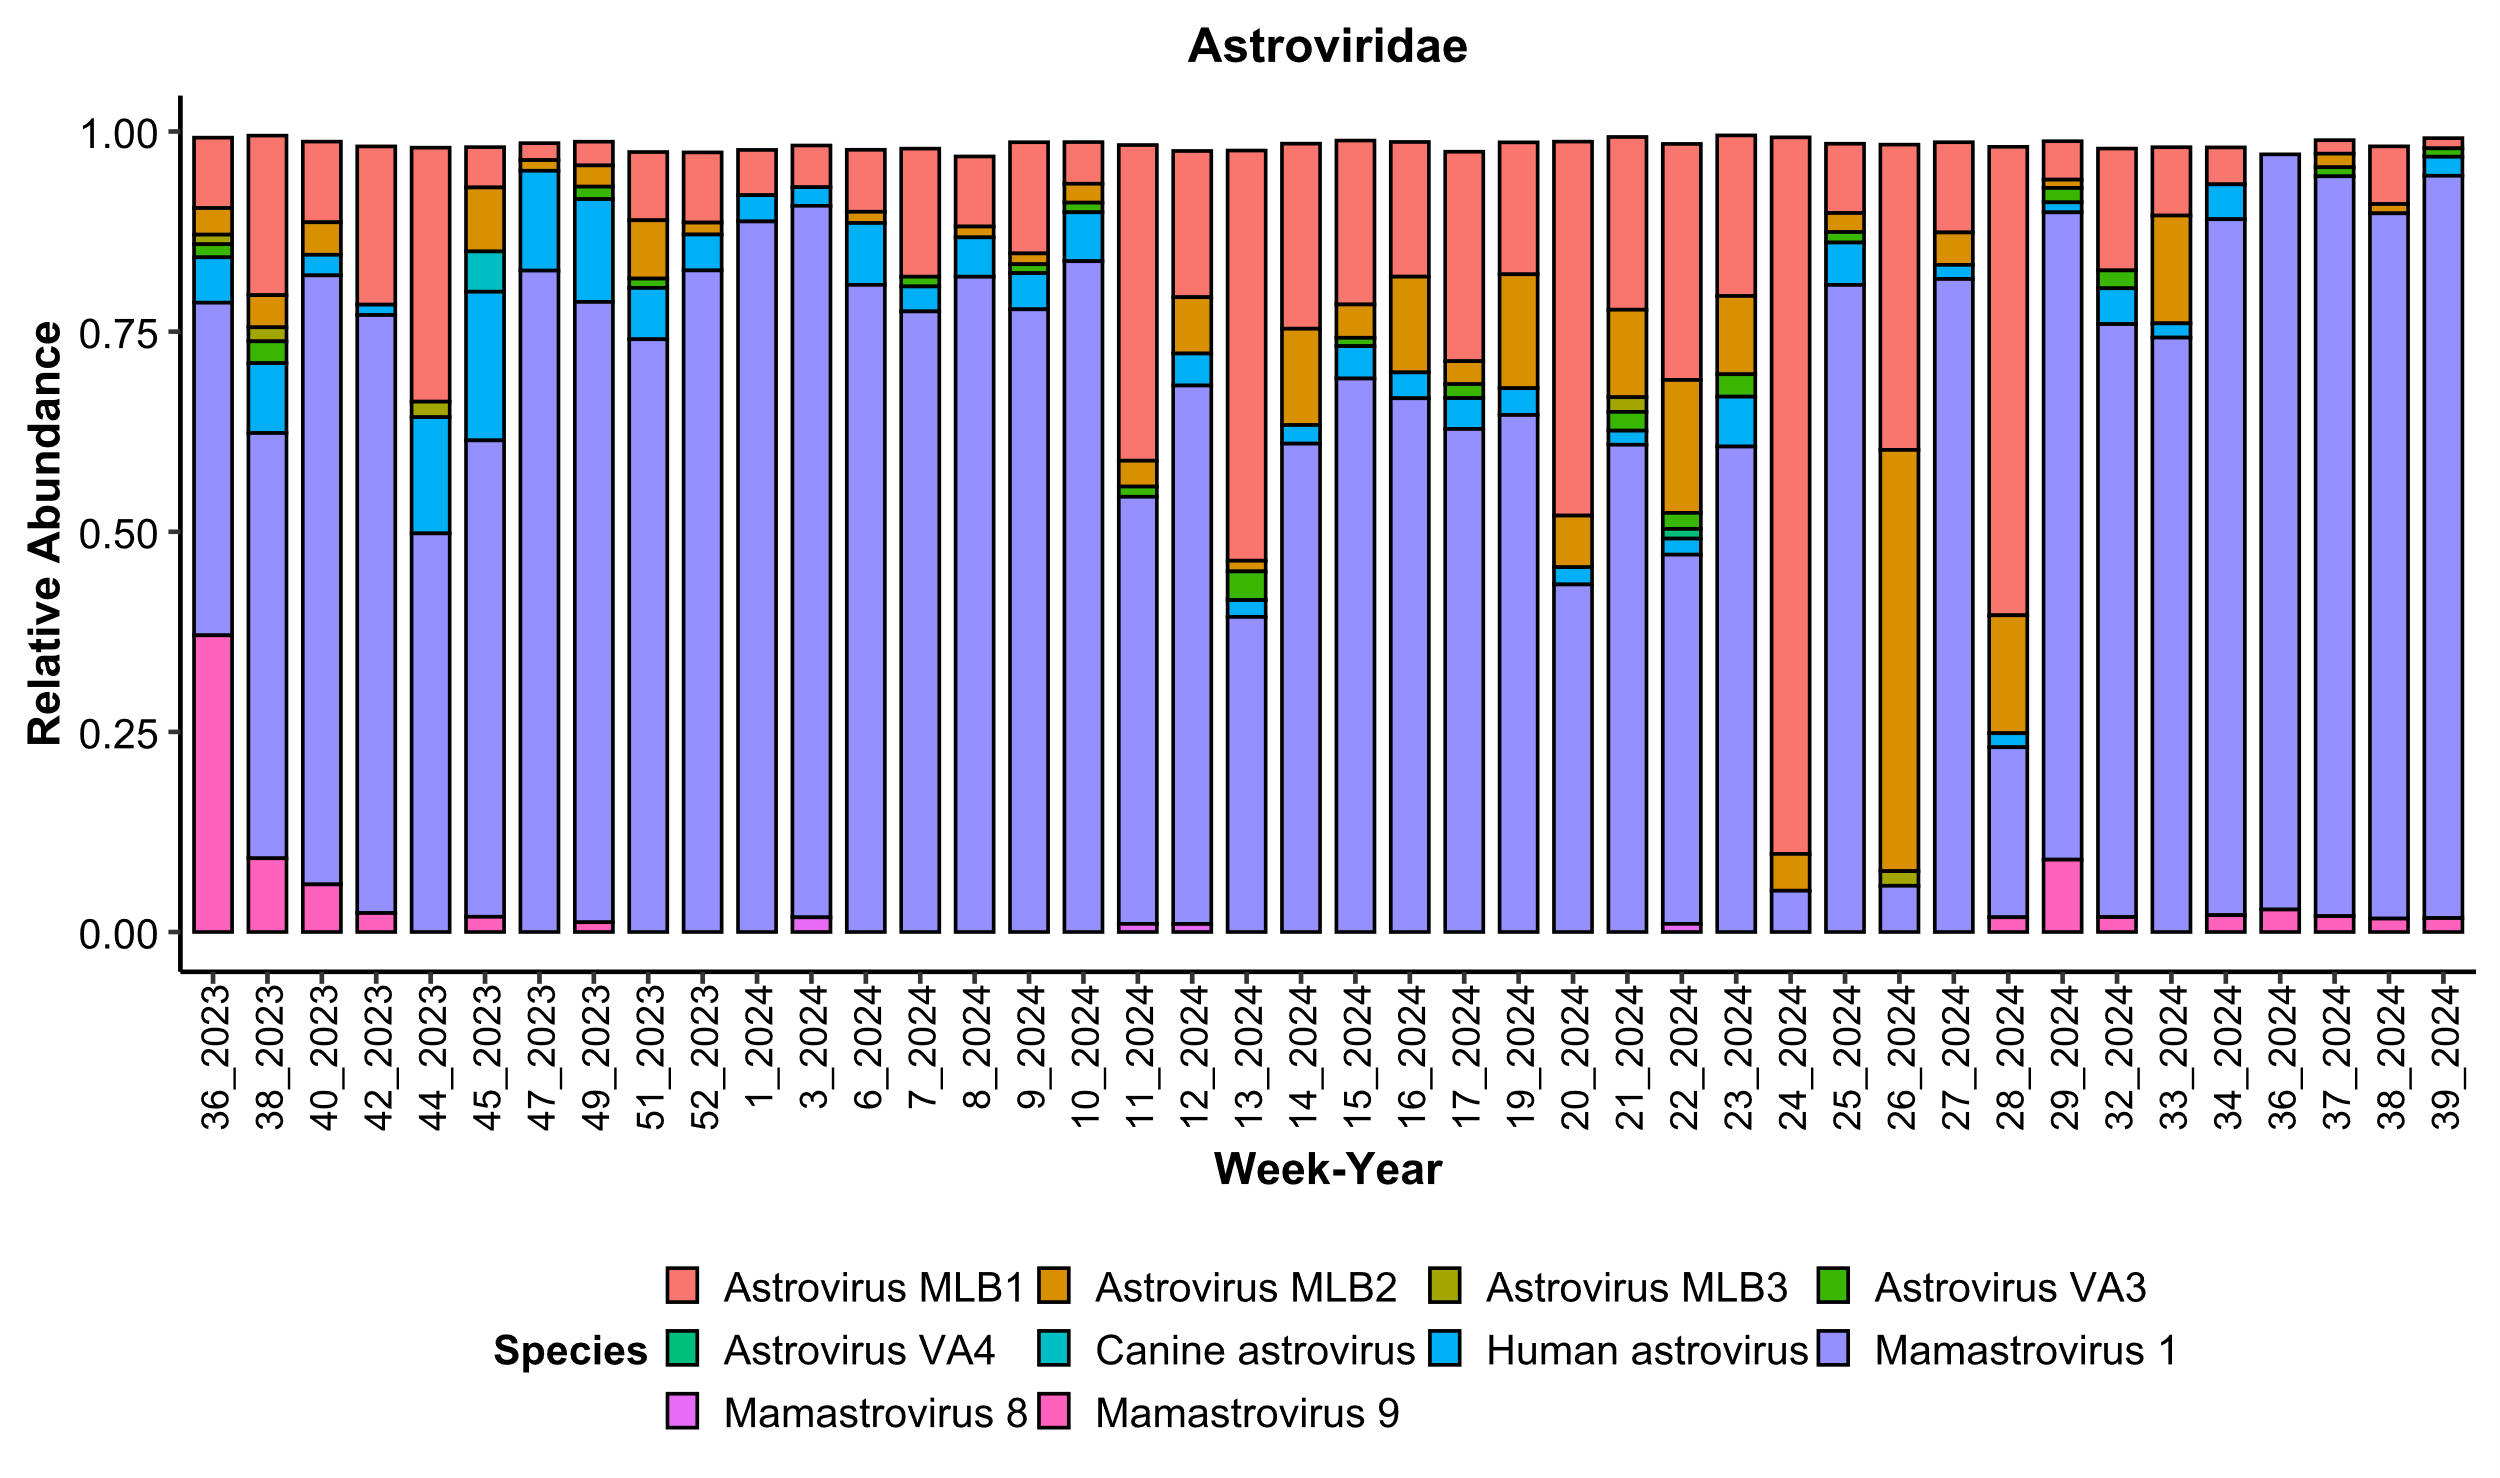

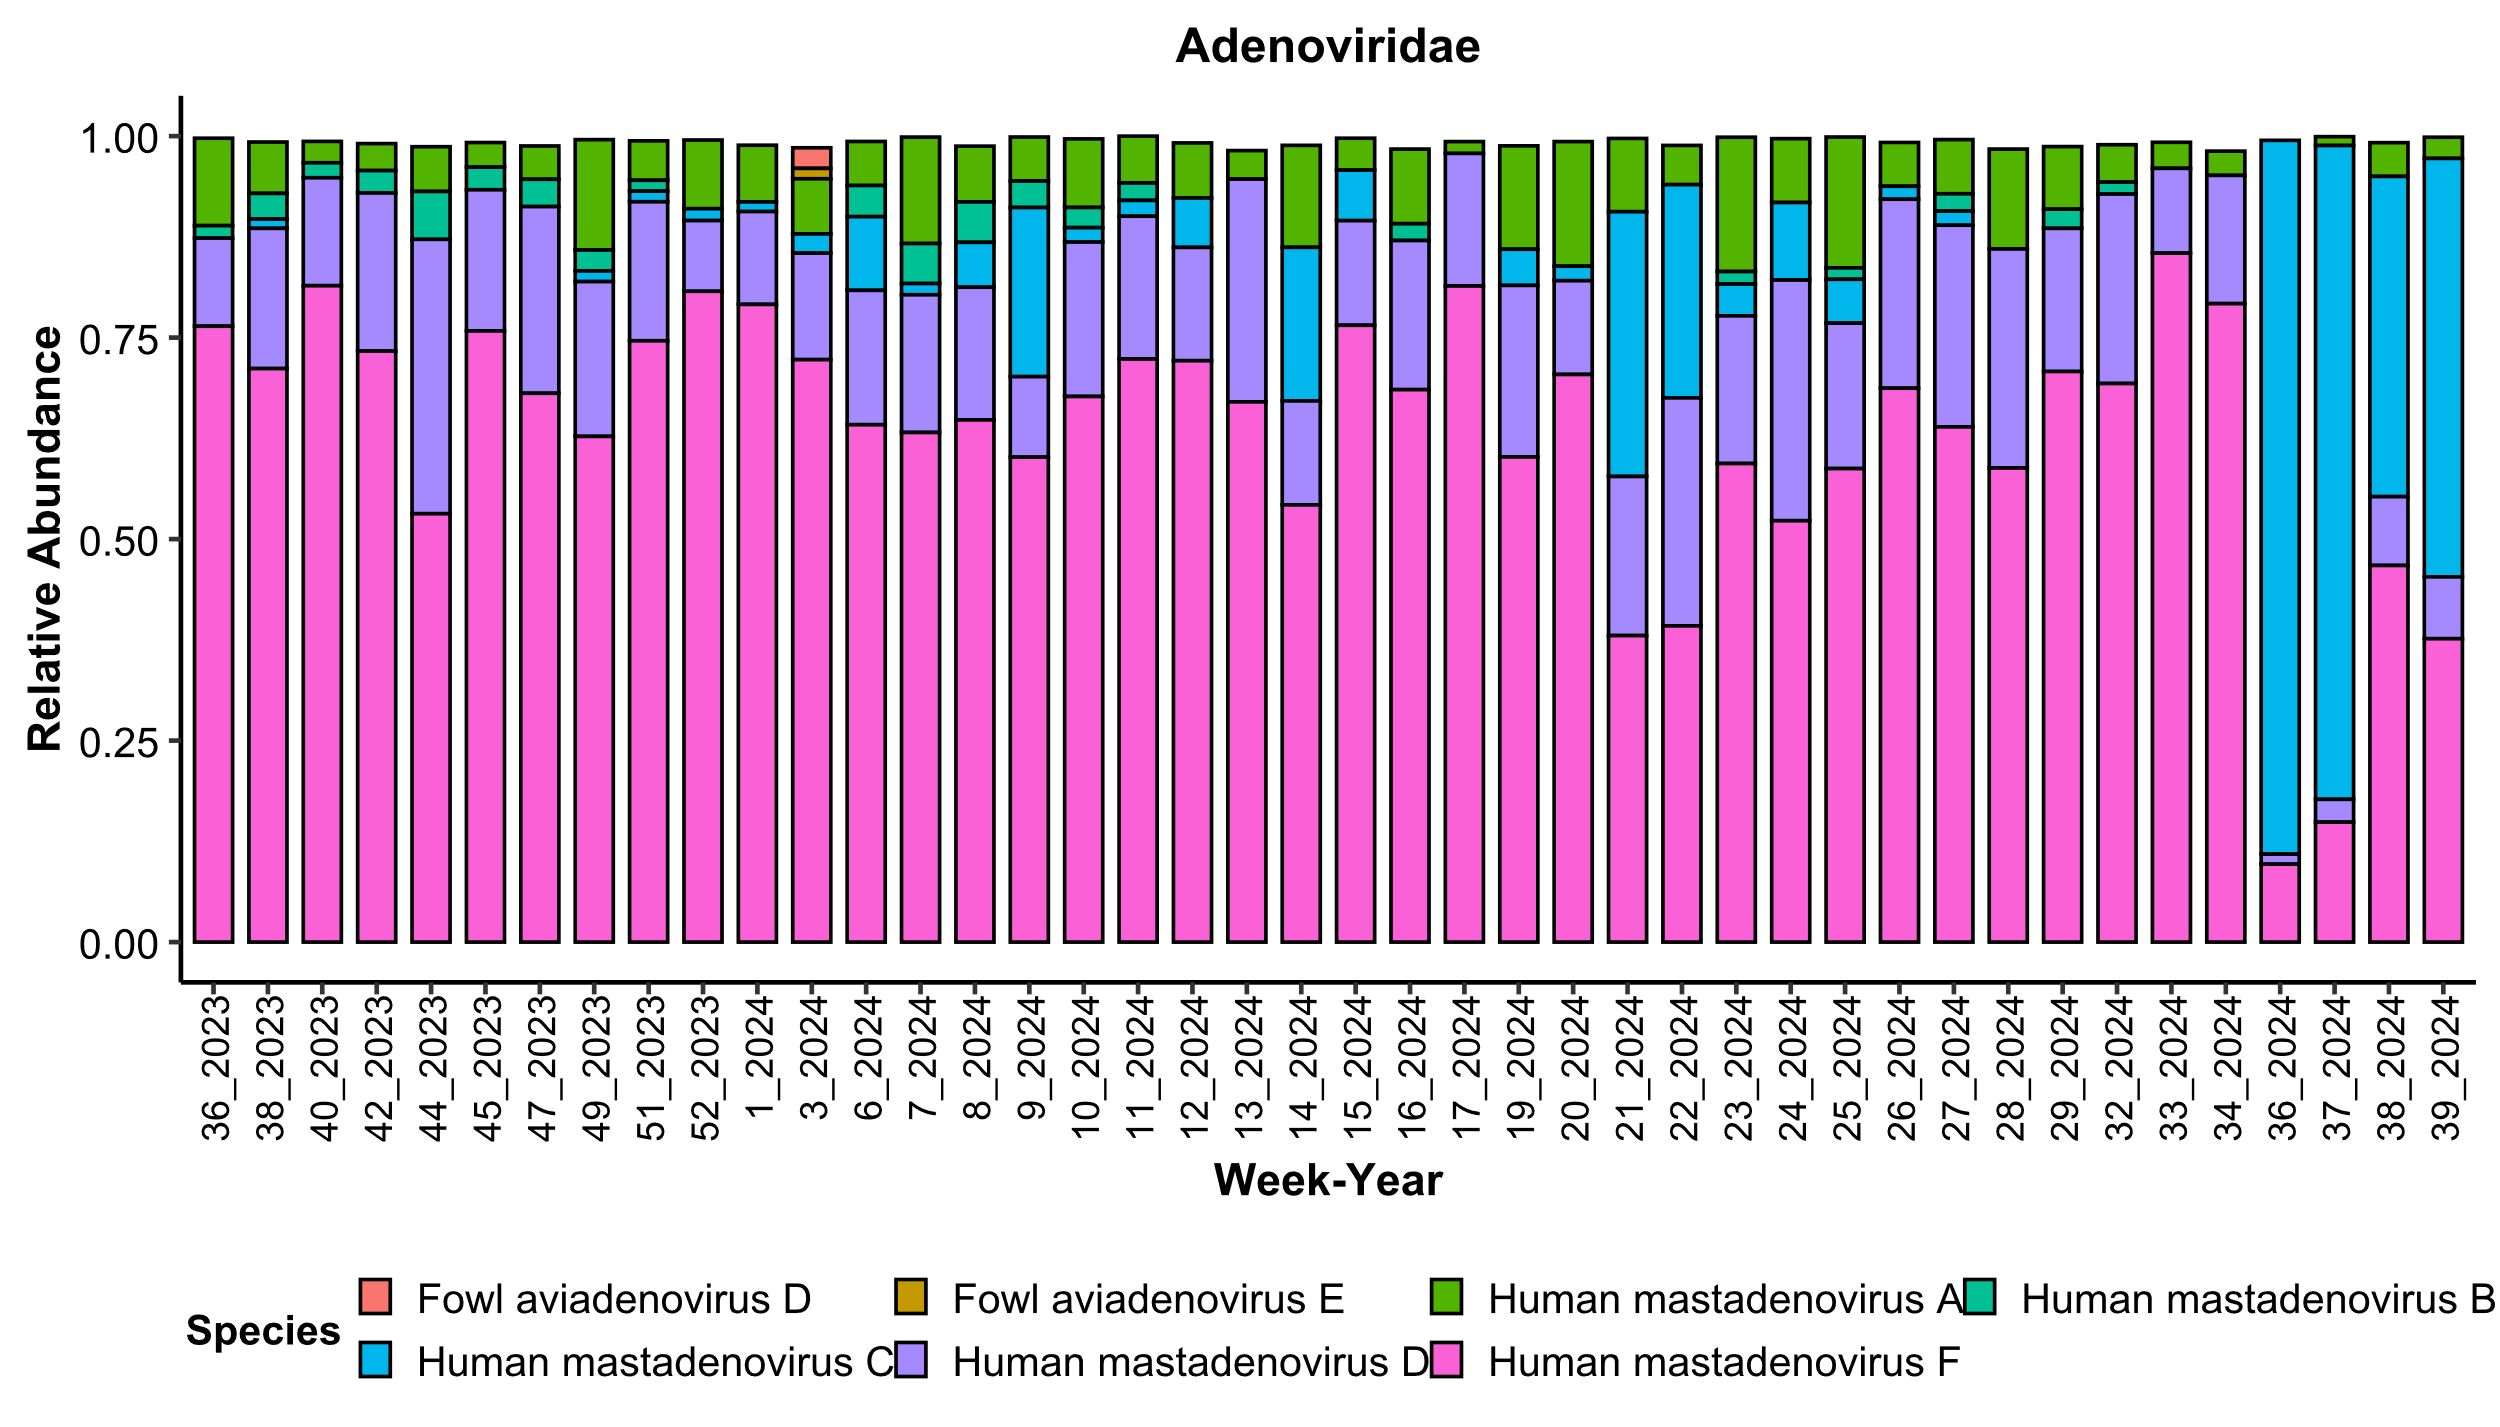

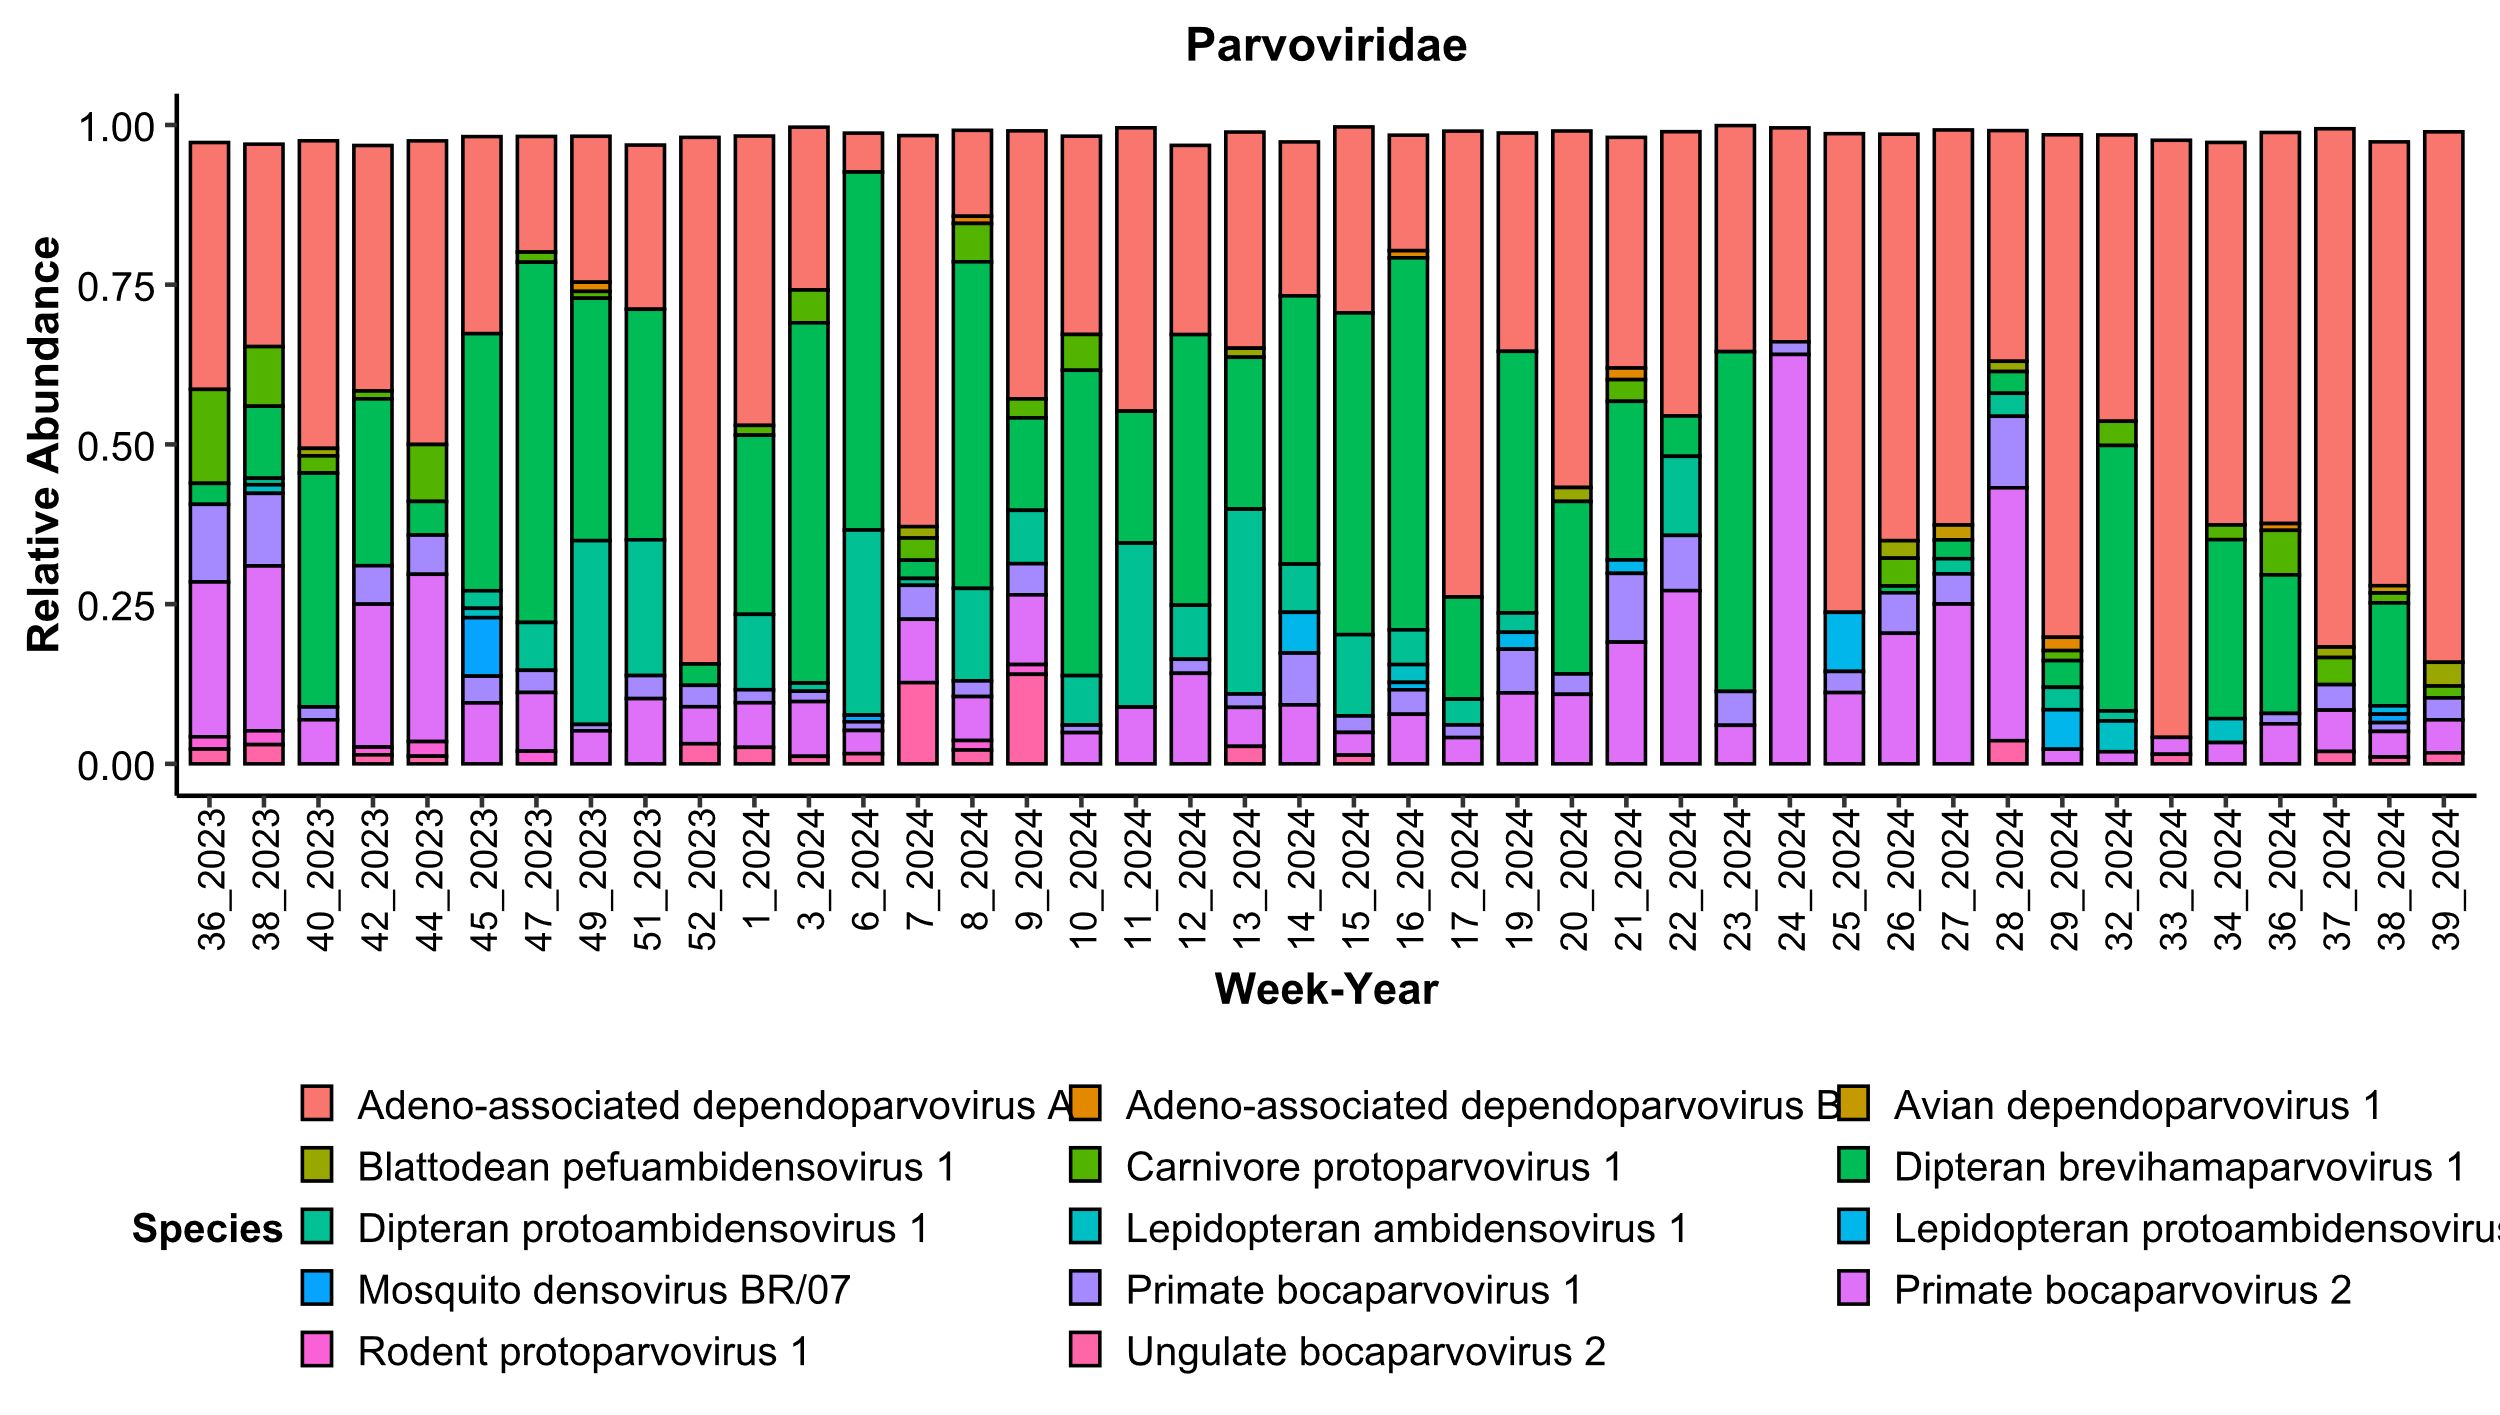


**Figure S2**. Relative abundance of top species of virus with abundance cutoff >1 percent, for different families of viruses over different weeks of the year.


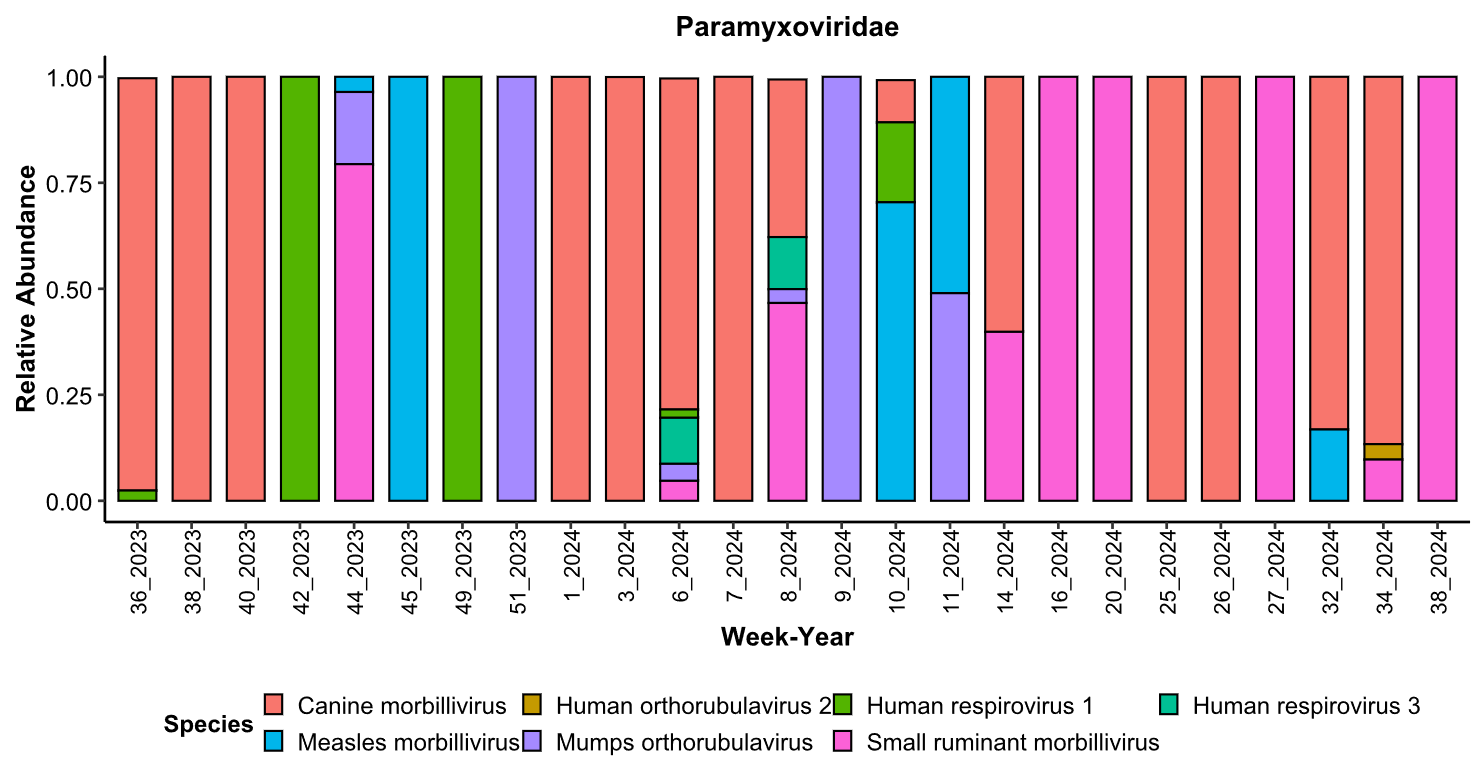

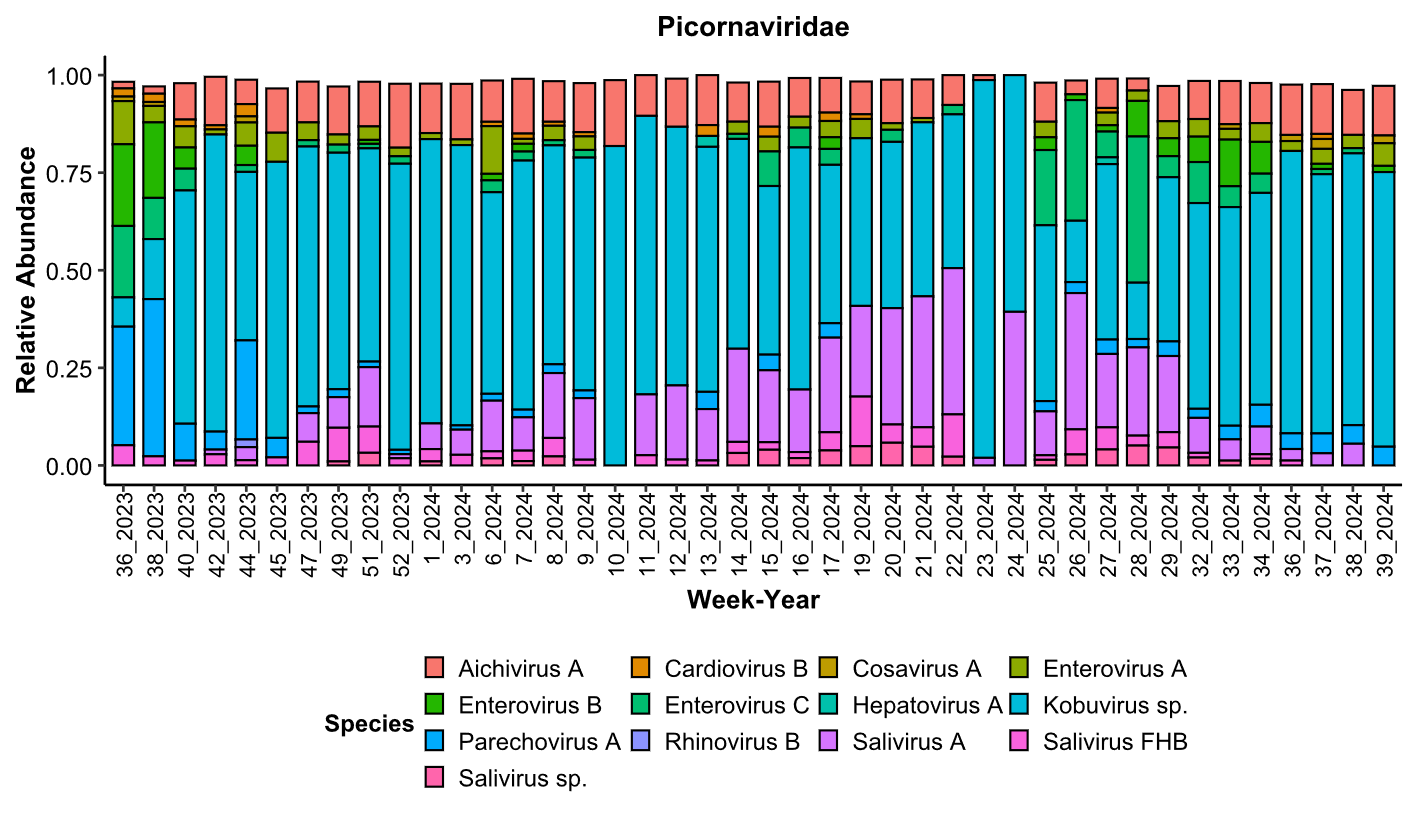

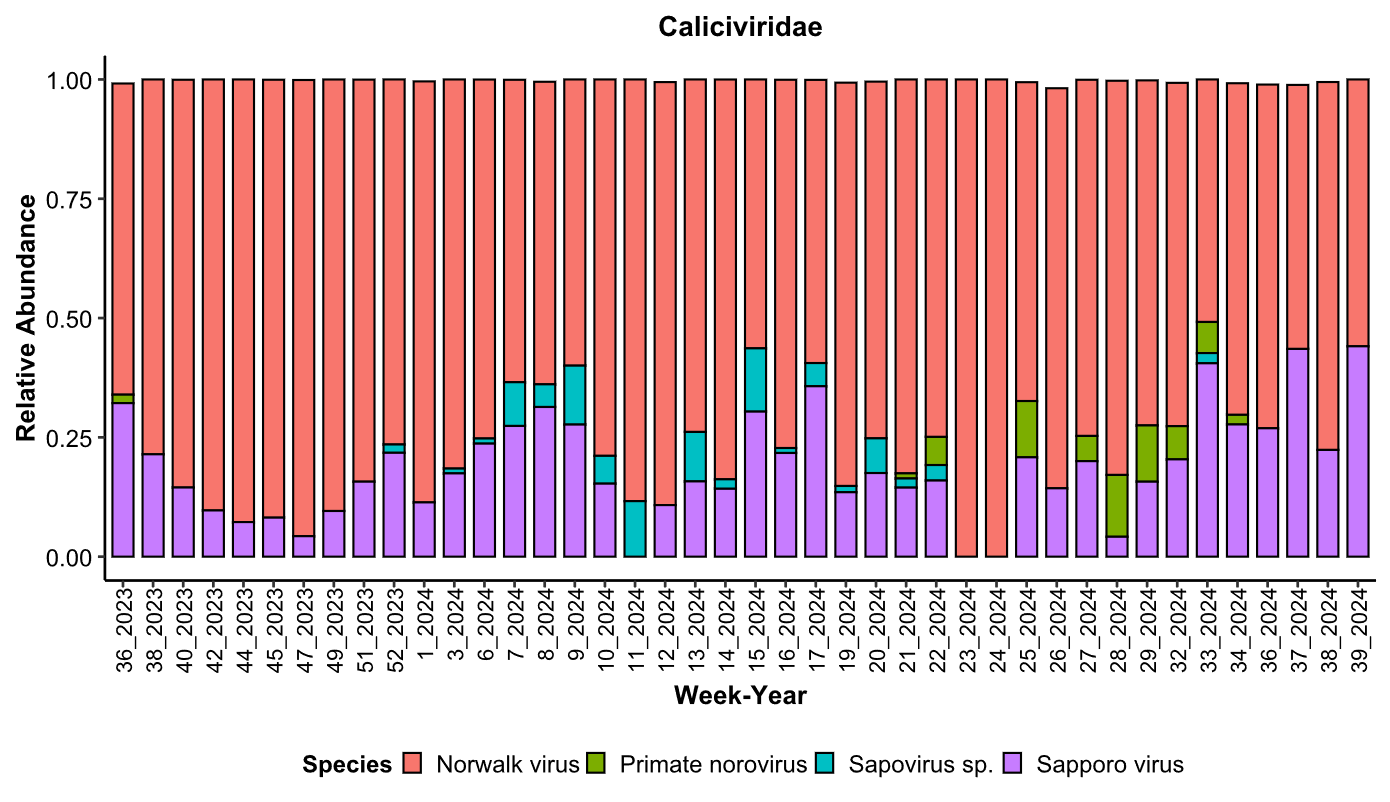

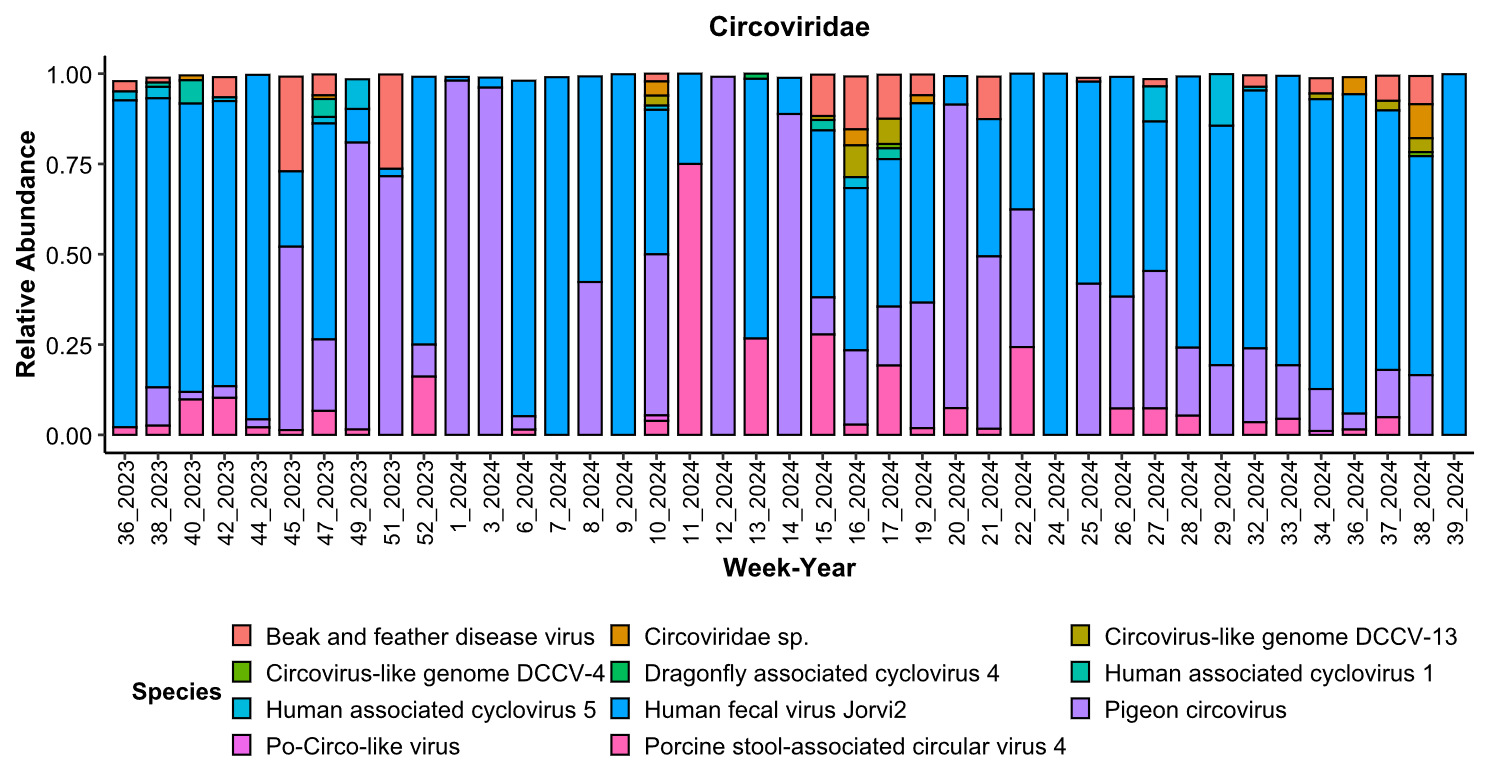


**Figure S3**. Relative abundance of top species of virus with abundance cutoff >1 percent, for different families of viruses over different weeks of the year.


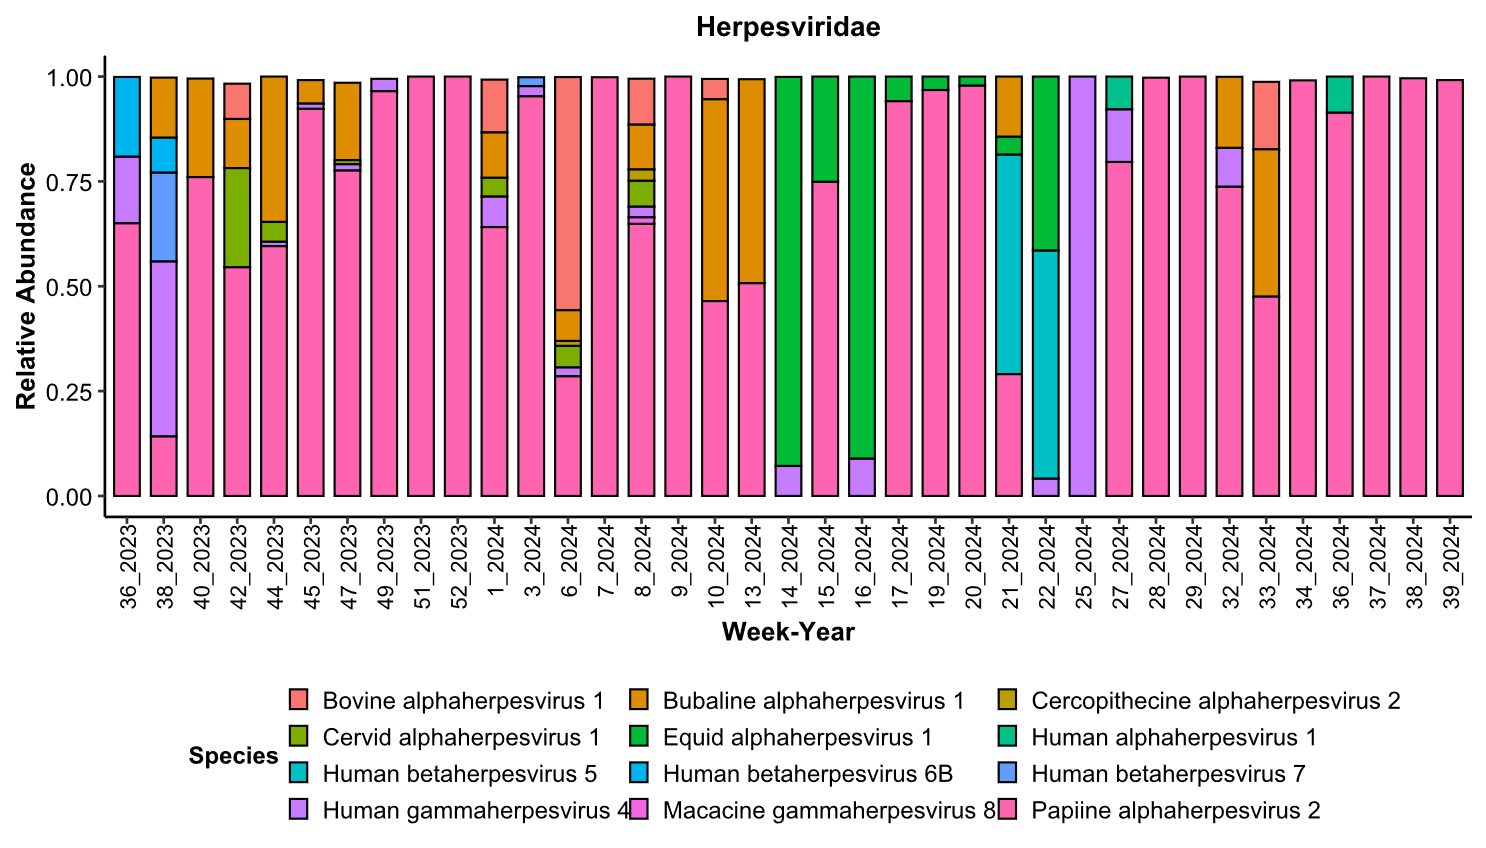

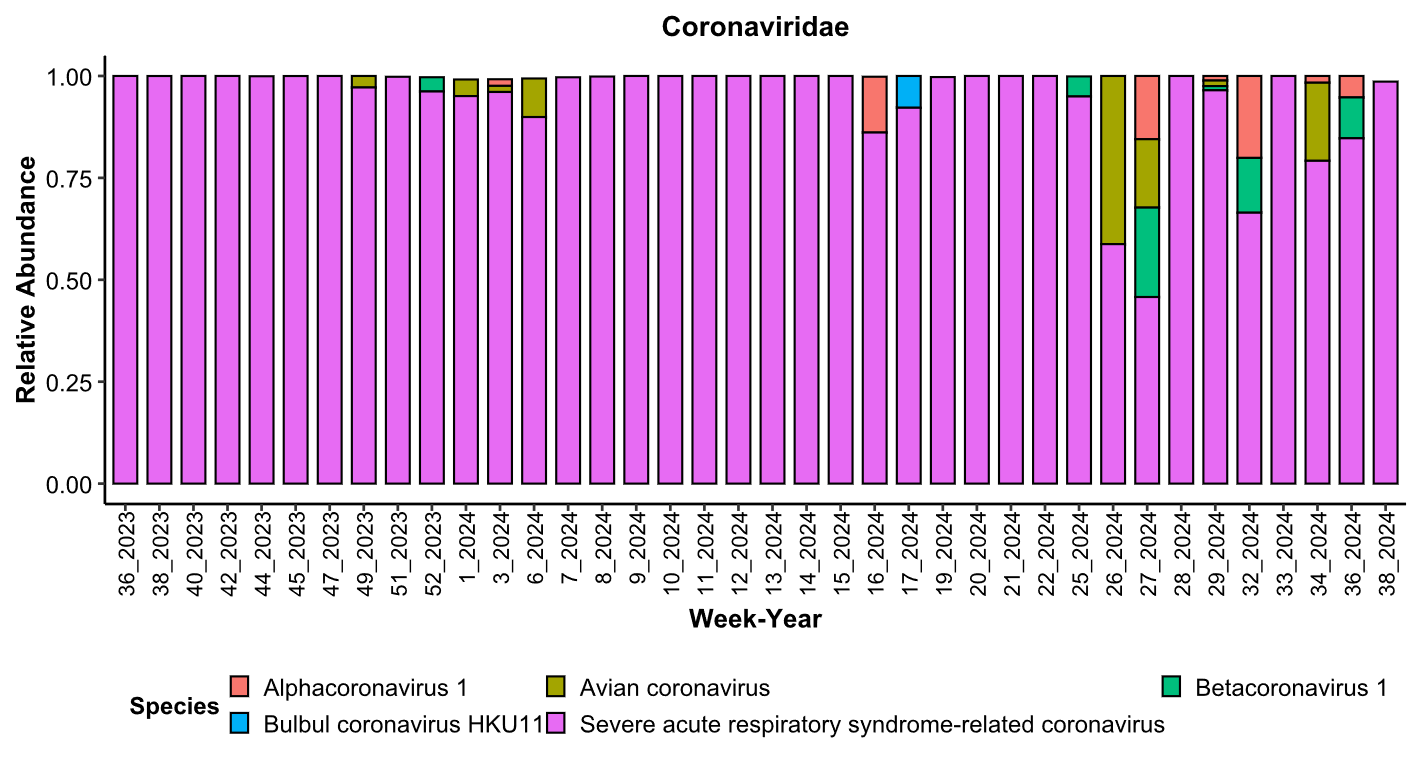

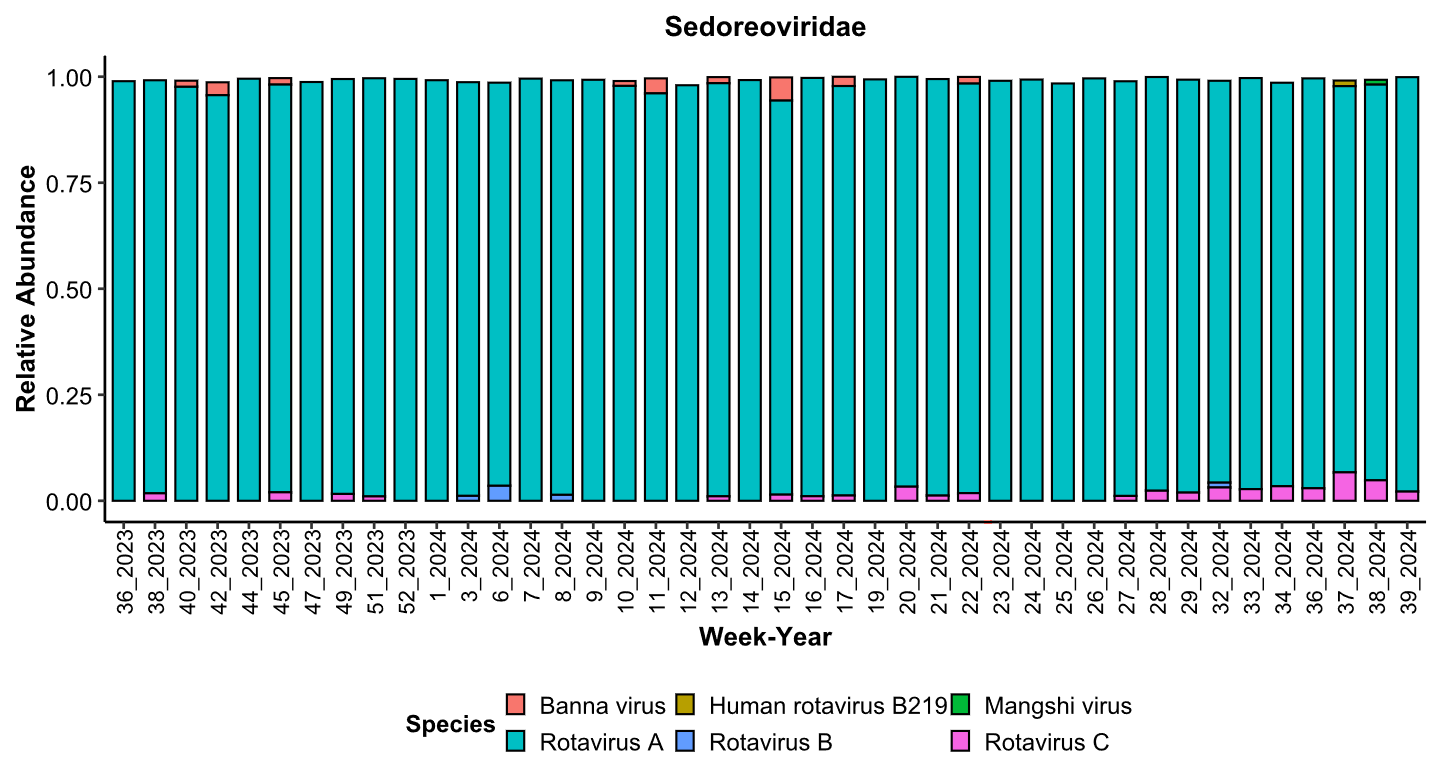

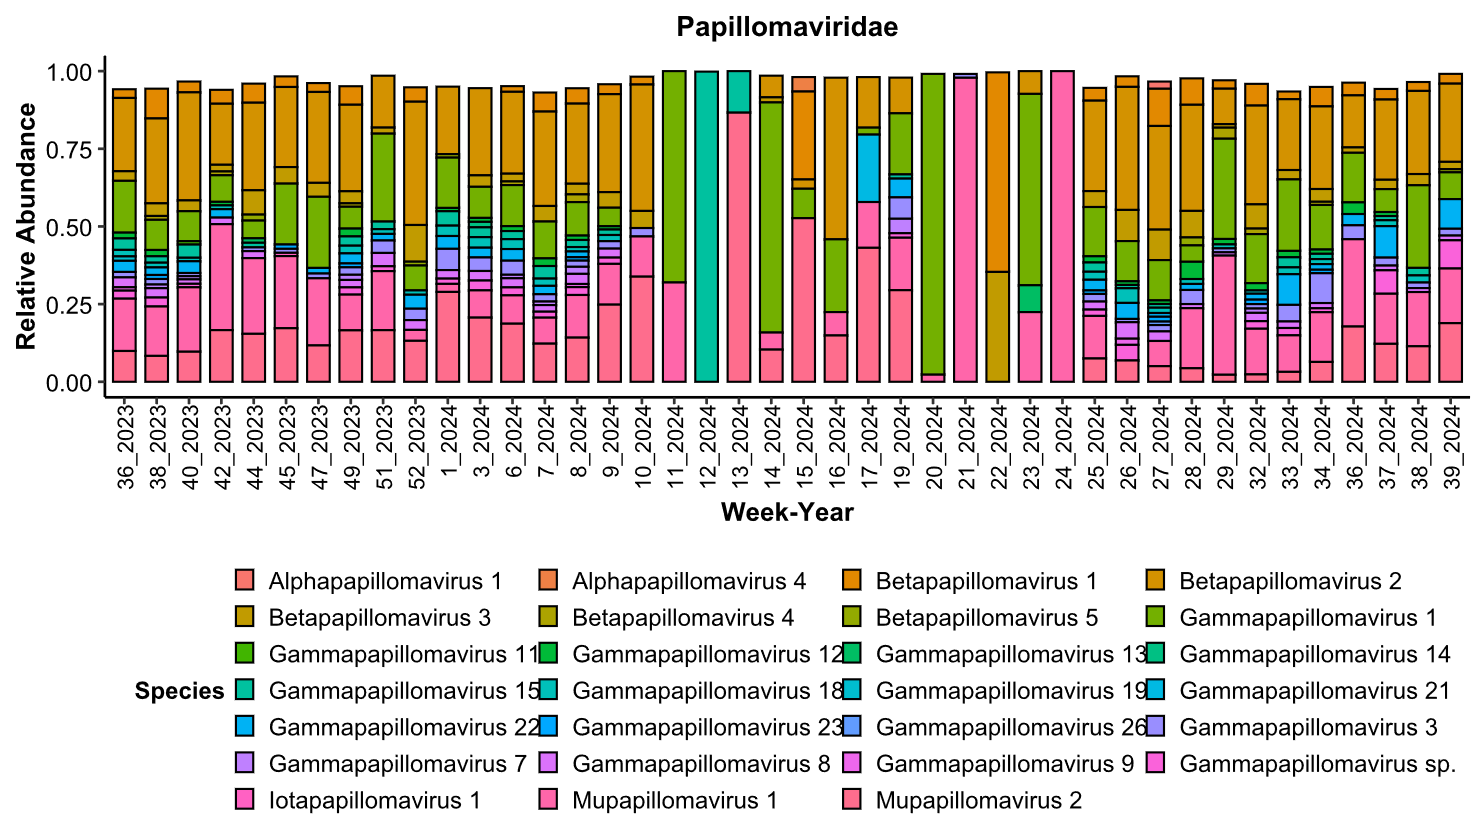


**Figure S4**. Relative abundance of top species of virus with abundance cutoff >1 percent, for different families of viruses over different weeks of the year.


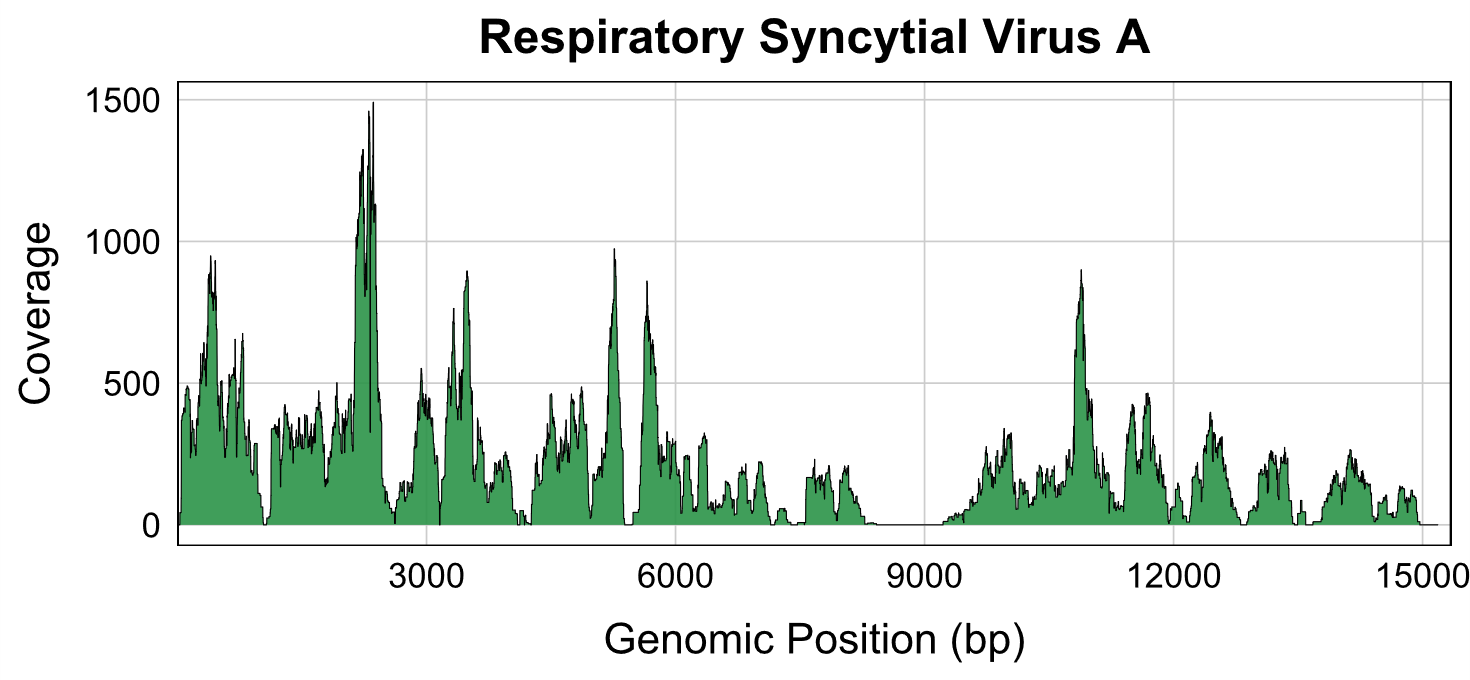

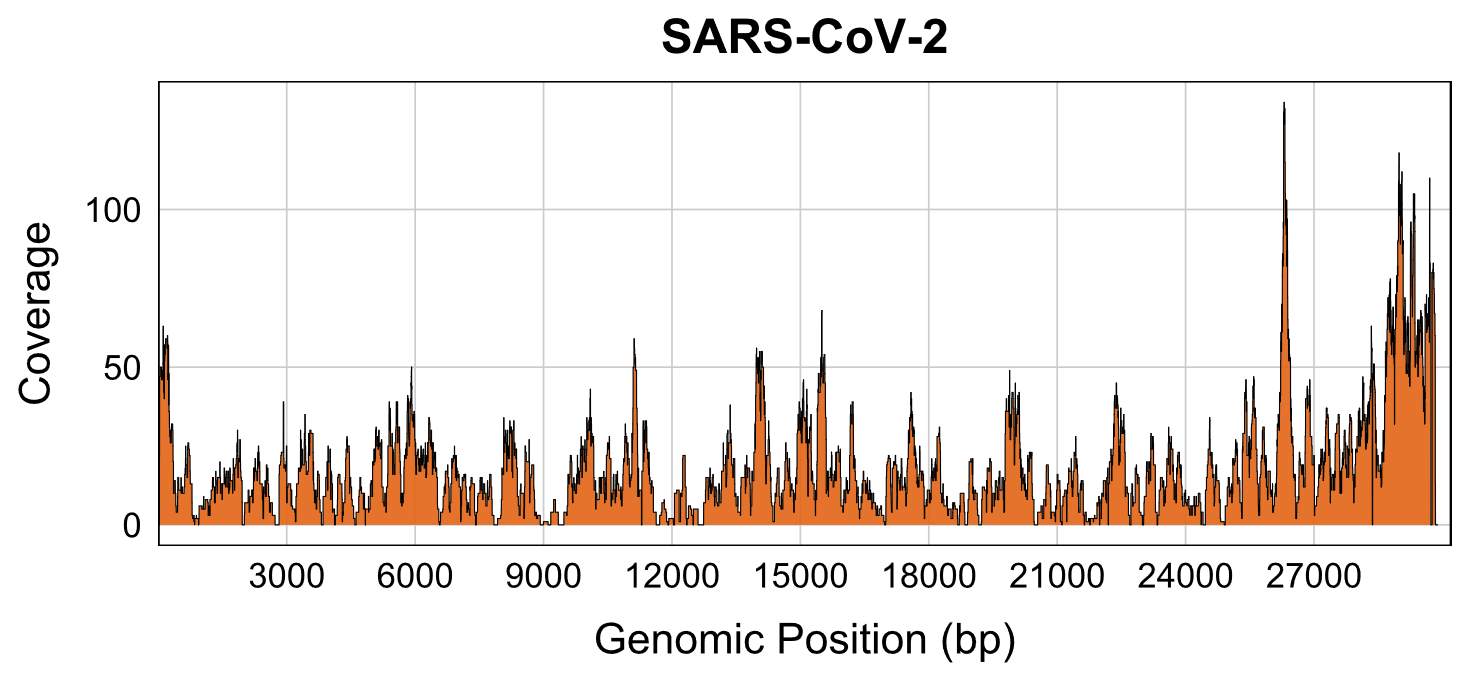

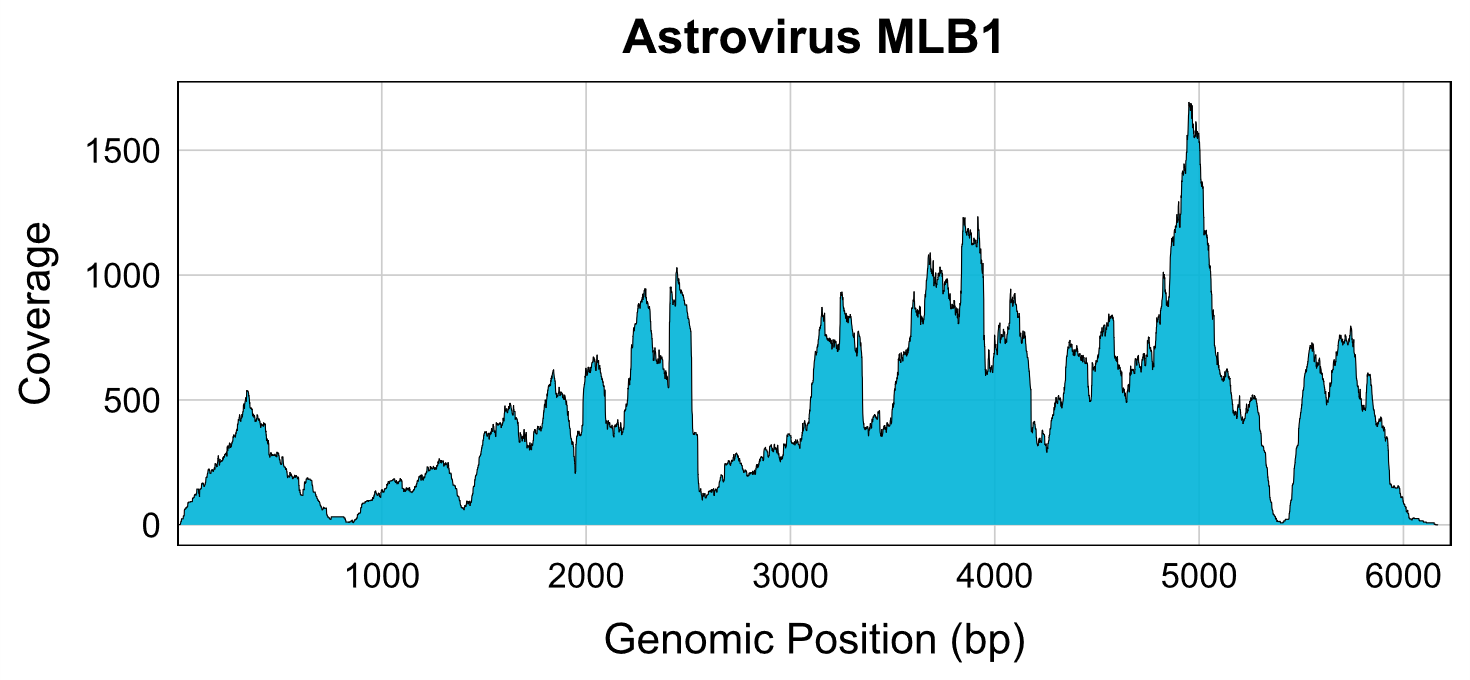

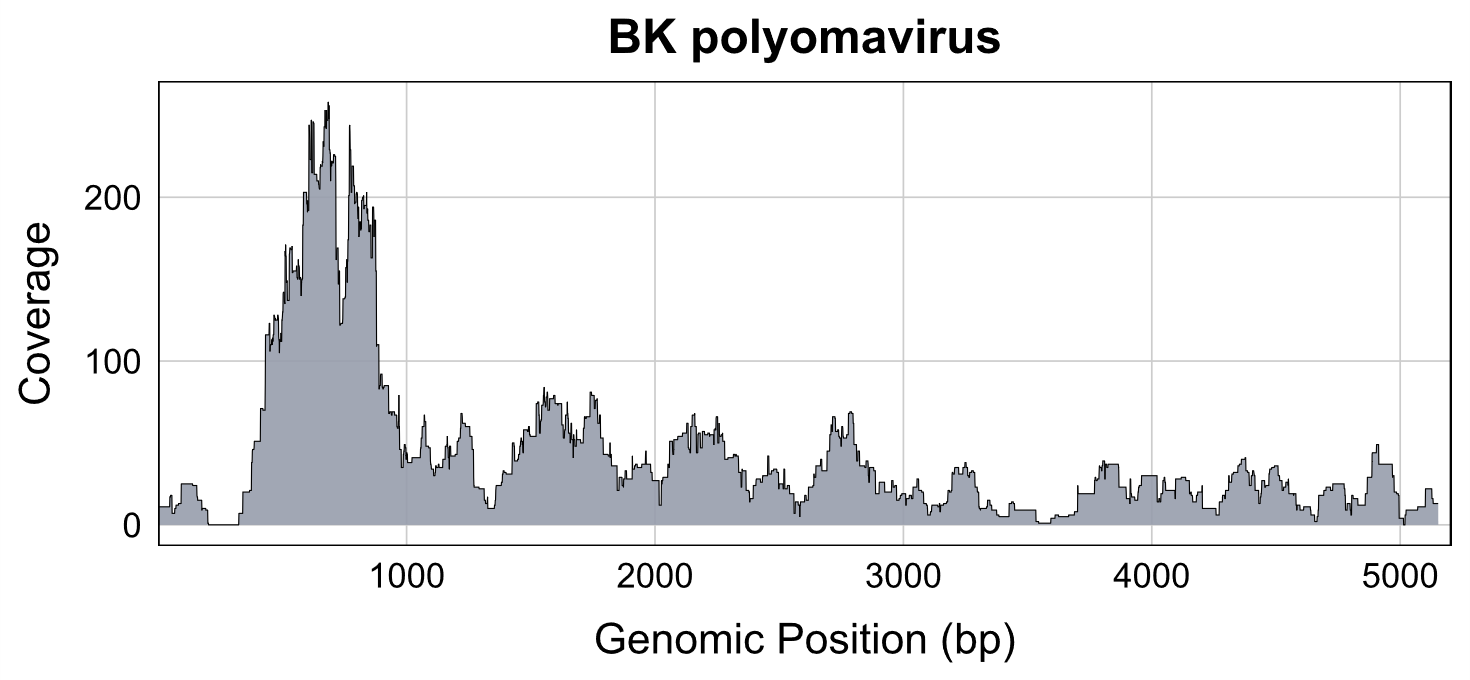

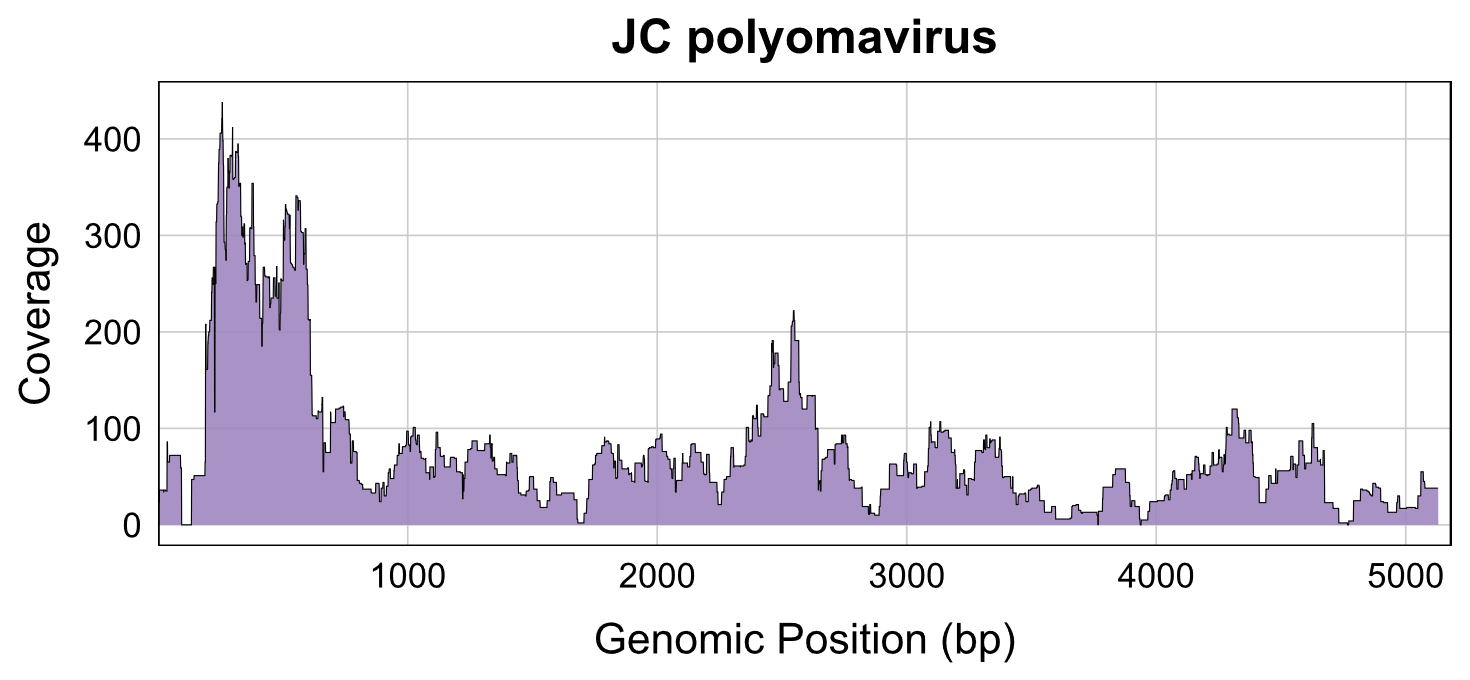

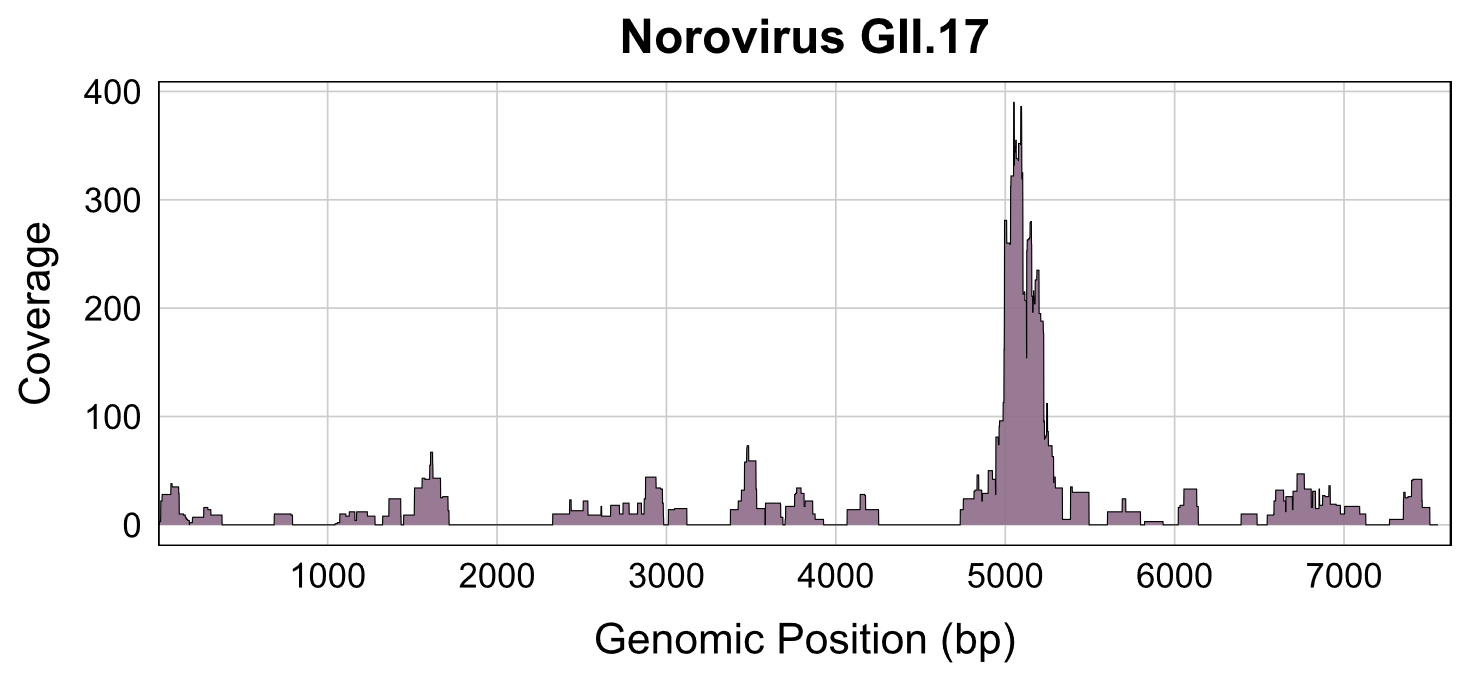

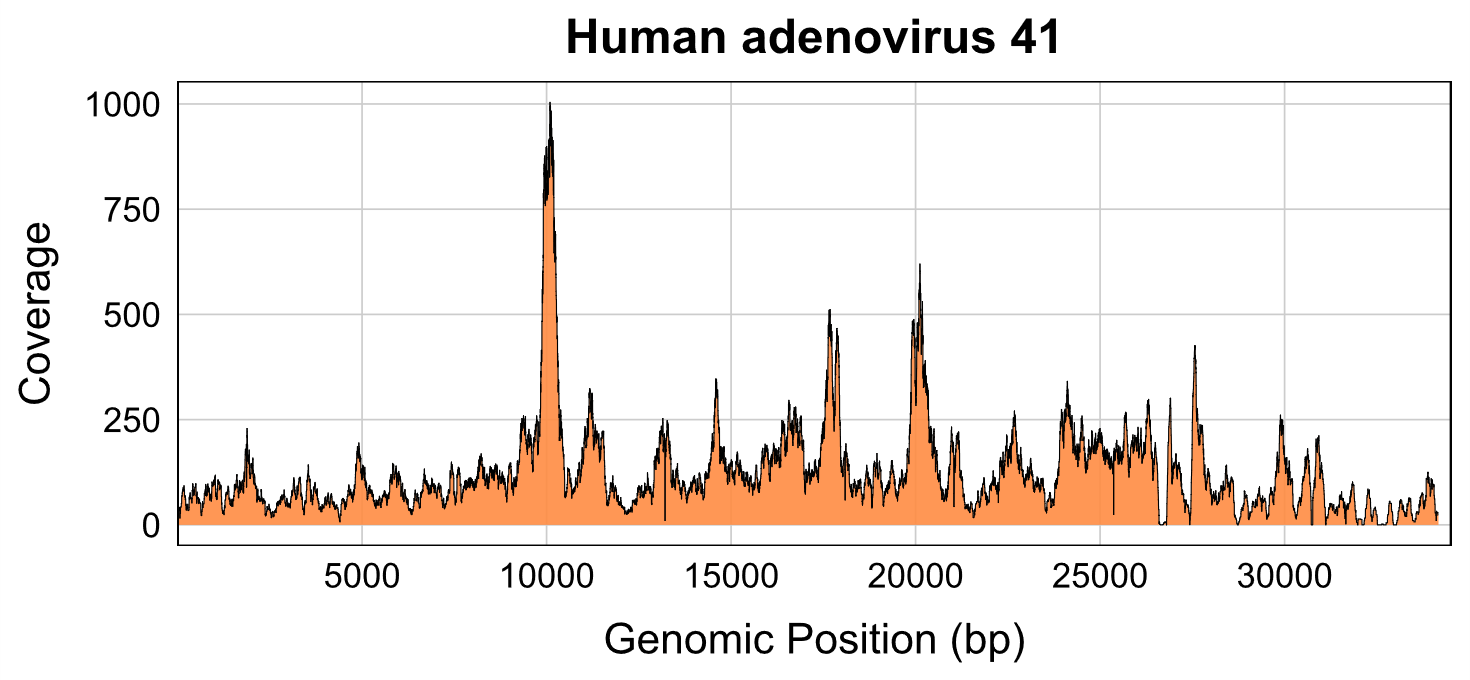

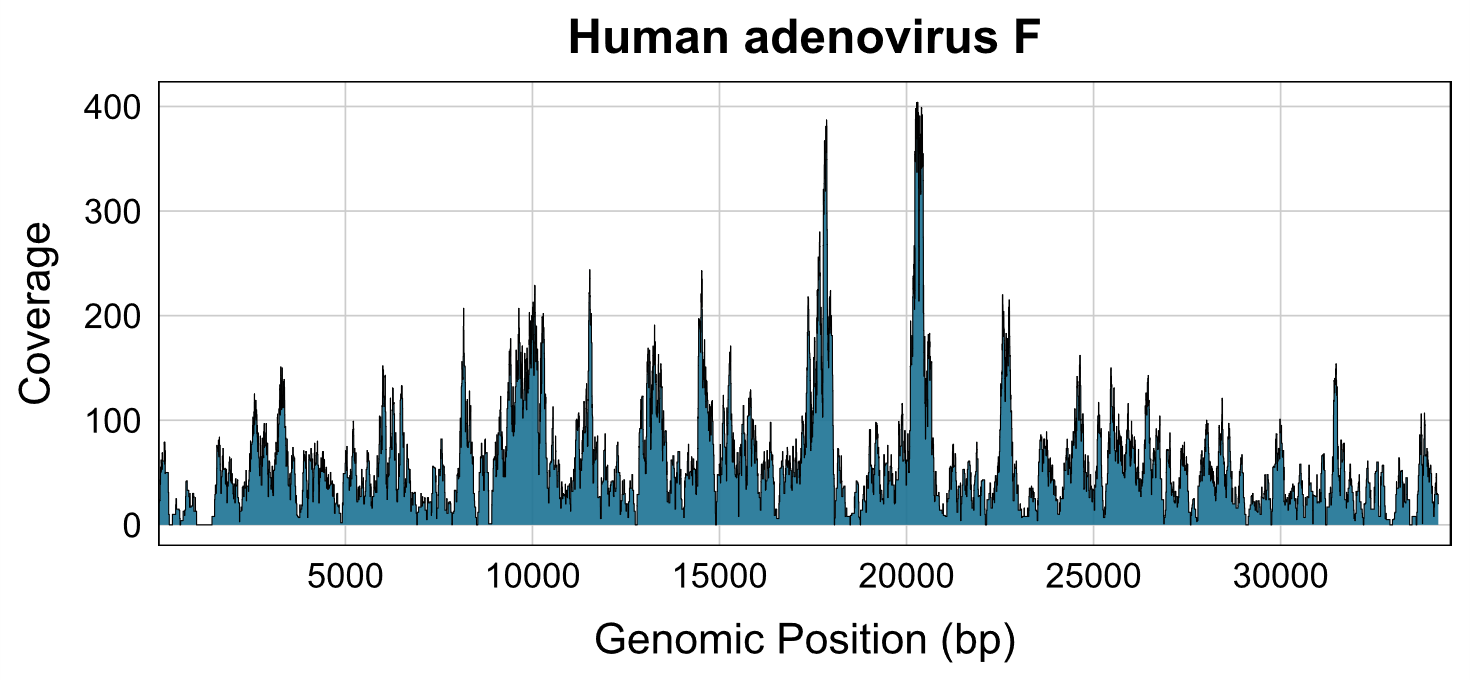


**Figure S5.** Genome coverage plots for selected clinically relevant viruses detected in
wastewater. The x-axis denotes genomic position (bp), and the y-axis shows sequencing coverage depth, demonstrating the extent of genome recovery.


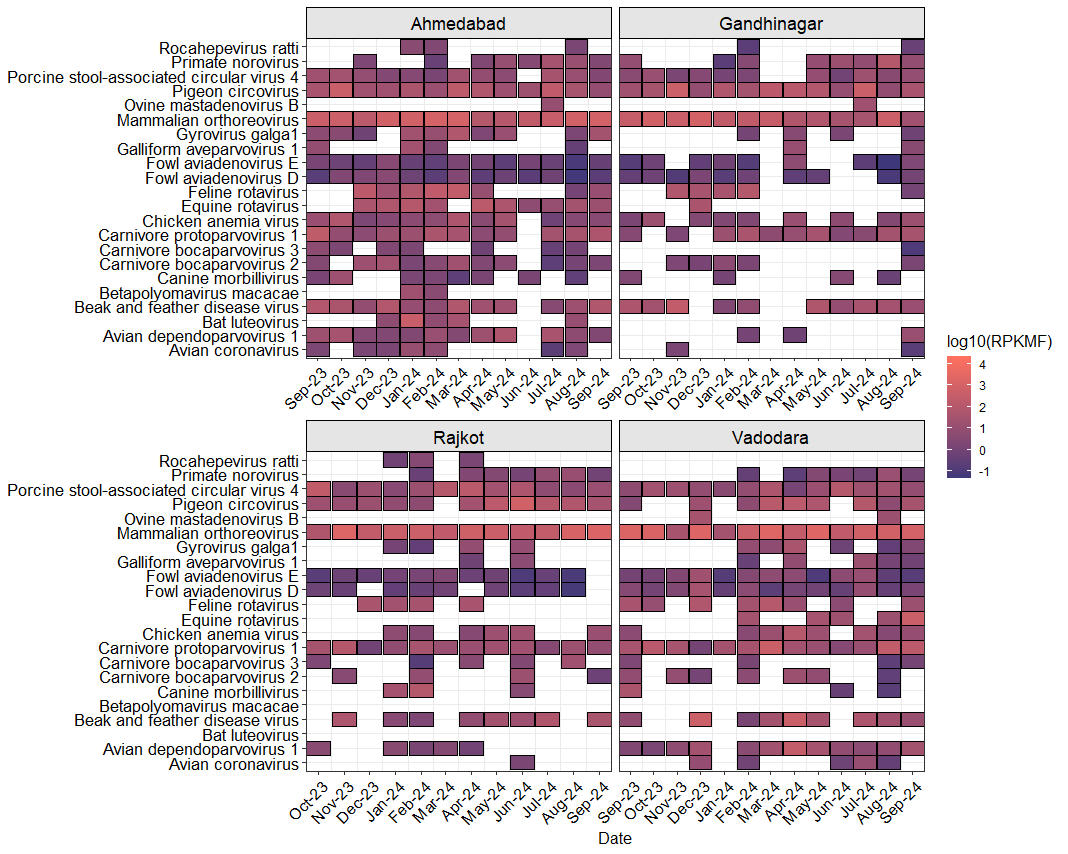


**Figure S6.** Temporal distribution and abundance of animal-associated viruses in wastewater across four cities. Heatmap showing the detection and relative abundance of animal-associated viruses in wastewater samples collected from Ahmedabad, Gandhinagar, Rajkot, and Vadodara between September 2023 and September 2024. Each tile represents a unique virus detected in a given month, with color intensity corresponding to the log-transformed RPKMF values (log₁₀ RPKMF), a proxy for sequencing-based viral abundance. The panel illustrates dynamic temporal variation in the presence of viruses linked to animal hosts, including avian, mammalian, and zoonotic viruses, highlighting city-specific patterns in their prevalence.
